# Supplementary material for: Transcriptome Profiling of Taproot Reveals Complex Regulatory Networks during Taproot Thickening in Radish (Raphanus sativus L.)
Source: Front Plant Sci. 2016 Aug 22;7:1210. doi: 10.3389/fpls.2016.01210 (PMC4992731; doi:10.3389/fpls.2016.01210)
Supplement: Table S3 — The analysis of DEGs with an RPKM value ≥ 100 in at least one of the three comparisons. [file Table3.XLSX]

## Sheet: Sheet1
Table S3 The analysis of DEGs with an RPKM value ≥ 100 in at least one of the three comparisons.
Transcript ID	Length	Transcripts expression level			RPKM			log2 Ratio			Up-Down-Regulation			FDR			KEGG Orthology	GO Component	GO Function	GO Process	Blast nr	Gene ID [Arabidopsis thaliana]	Gene name
		L1	L2	L3	L1	L2	L3	log2 (L2/L1)	log2 (L3/L1)	log2 (L3/L2)	L1 VS L2	L1 VS L3	L2 VS L3	L1 VS L2	L1 VS L3	L2 VS L3
CL10888.Contig2_NAU-YH	946	0	506	628	0.01	156.041	178.454	13.9296	14.1233	0.193621	Up	Up	Up	2.65e-144	6.88e-169	0.0925687	-	-	-	-	-	None
gi|332792342|gb|FY450522.1|FY450522	678	0	178	486	0.01	76.5898	192.692	12.9029	14.234	1.33107	Up	Up	Up	3.94e-50	2.02e-130	5.34e-27	-	-	-	GO:0006950//response to stress	hypothetical protein ARALYDRAFT_477244 [Arabidopsis lyrata subsp. lyrata]	ath:AT1G80130
Unigene16745_NAU-YH	1277	16	2003	3570	3.87279	457.584	751.51	6.88452	7.60027	0.715756	Up	Up	Up	0	0	6.02e-71	K09872|1|1e-155|547|ath:AT2G39010|aquaporin PIP	GO:0031224//intrinsic to membrane	GO:0005372//water transmembrane transporter activity	GO:0006952//defense response;GO:0051707//response to other organism;GO:0006996//organelle organization;GO:0009746;GO:0006091//generation of precursor metabolites and energy;GO:0009696//salicylic acid metabolic process;GO:0006970//response to osmotic stress;GO:0006873//cellular ion homeostasis;GO:0070838//divalent metal ion transport;GO:0042044//fluid transport	water channel protein [Brassica rapa]	ath:AT2G39010	PIP2E
Unigene23034_NAU-YH	1585	4	453	6068	0.780056	83.3776	1029.14	6.73994	10.3656	3.62563	Up	Up	Up	4.34e-121	0	0	K15283|1|0.0|669|aly:ARALYDRAFT_475149|solute carrier family 35, member E1	GO:0031224//intrinsic to membrane;GO:0009536//plastid;GO:0031090//organelle membrane	GO:0015291//secondary active transmembrane transporter activity;GO:0015119;GO:0005342//organic acid transmembrane transporter activity	GO:0009642//response to light intensity;GO:0051707//response to other organism;GO:0006996//organelle organization;GO:0009746;GO:0015712//hexose phosphate transport;GO:0015717//triose phosphate transport;GO:0019953//sexual reproduction;GO:0009555//pollen development;GO:0034285;GO:0015979//photosynthesis;GO:0015718//monocarboxylic acid transport	glucose-6-phosphate/phosphate translocator 2 [Arabidopsis lyrata subsp. lyrata]	ath:AT1G61800	GPT2
CL710.Contig1_NAU-YH	371	0	1	513	0.01	0.786333	110.135	6.29707	13.427	7.12992	Up	Up	Up	0.699254	3.48e-40	6.25e-40	-	-	-	-	hypothetical protein [Arabidopsis thaliana]	ath:AT5G03210
Unigene21708_NAU-YH	382	0	1	7954	0.01	0.76369	5597.31	6.25492	19.0944	12.8395	Up	Up	Up	0.673404	0	0	-	-	-	-	-	None
CL3.Contig2_NAU-YH	1545	18	895	3377	3.60113	168.995	587.57	5.55239	7.35017	1.79778	Up	Up	Up	1.48e-224	0	2.04e-290	K14165|1|3e-17|88.6|cme:CMT465C|dual specificity phosphatase [EC:3.1.3.16 3.1.3.48];K07200|2|2e-06|52.8|vcn:VOLCADRAFT_63727|5'-AMP-activated protein kinase, regulatory gamma subunit	GO:0009532//plastid stroma	GO:0001871;GO:0004721//phosphoprotein phosphatase activity	GO:0005984//disaccharide metabolic process;GO:0005982//starch metabolic process;GO:0006464//cellular protein modification process;GO:0048511//rhythmic process;GO:0044093;GO:0006796//phosphate-containing compound metabolic process;GO:0019758	starch-excess 4 [Arabidopsis lyrata subsp. lyrata]	ath:AT3G52180	SEX4
Unigene23132_NAU-YH	245	1	43	513	1.26162	51.2015	127.277	5.34284	6.65655	1.31371	Up	Up	Up	1.65e-10	8.07e-29	1.23e-06	-	GO:0005576//extracellular region	-	GO:0051716//cellular response to stimulus;GO:0009814//defense response, incompatible interaction	aspartyl protease family protein [Arabidopsis thaliana]	ath:AT5G10760
Unigene30600_NAU-YH	781	1	35	371	0.395771	13.0737	127.697	5.04585	8.33384	3.28799	Up	Up	Up	2.22e-08	4.55e-97	3.68e-64	-	GO:0043231//intracellular membrane-bounded organelle	GO:0001071//nucleic acid binding transcription factor activity;GO:0005515//protein binding	GO:0048506;GO:0009725//response to hormone stimulus;GO:0000902//cell morphogenesis;GO:0009639//response to red or far red light	protein banquo 2 [Arabidopsis thaliana]	ath:AT5G15160	BNQ2
CL12699.Contig1_NAU-YH	957	25	875	1805	8.07464	266.733	507.017	5.04585	5.97249	0.926638	Up	Up	Up	6.44e-210	0	7.68e-56	K10082|1|3e-08|57.8|mtr:MTR_5g031140|lectin, mannose-binding 2	GO:0005618//cell wall;GO:0005576//extracellular region;GO:0009536//plastid	GO:0005488//binding	GO:0009628//response to abiotic stimulus;GO:0010243//response to organic nitrogen;GO:0050832//defense response to fungus	lectin-like protein [Arabidopsis thaliana]	ath:AT5G03350
gi|154180413|gb|EV549753.1|EV549753	845	8	266	338	2.92636	91.8344	107.527	4.97185	5.19945	0.227591	Up	Up	Up	4.61e-63	2.05e-77	0.168462	-	GO:0005911//cell-cell junction;GO:0005618//cell wall	-	GO:0071555//cell wall organization;GO:0009607//response to biotic stimulus;GO:0033205//cell cycle cytokinesis	thaumatin-like cytokinin-binding protein [Brassica oleracea]	ath:AT2G28790
Unigene1147_NAU-YH	368	4	114	513	3.35975	90.3728	110.303	4.74946	5.03697	0.287509	Up	Up	Up	2.72e-26	6.17e-34	0.277231	K01177|1|4e-27|117|ath:AT4G17090|beta-amylase [EC:3.2.1.2]	GO:0009532//plastid stroma	GO:0016160//amylase activity;GO:0043167//ion binding	GO:0005982//starch metabolic process;GO:0000023//maltose metabolic process;GO:0006950//response to stress	beta-amylase 3 [Arabidopsis thaliana]	ath:AT4G17090	CT-BMY
CL1841.Contig1_NAU-YH	1474	11	287	1078	2.30669	56.8022	196.598	4.62205	6.41328	1.79123	Up	Up	Up	2.35e-65	8.86e-269	4.32e-92	K01177|1|0.0|900|ath:AT4G17090|beta-amylase [EC:3.2.1.2]	GO:0009532//plastid stroma	GO:0016160//amylase activity;GO:0043167//ion binding	GO:0005982//starch metabolic process;GO:0000023//maltose metabolic process;GO:0006950//response to stress	beta-amylase 3 [Arabidopsis thaliana]	ath:AT4G17090	CT-BMY
CL2483.Contig2_NAU-YH	2590	33	659	3314	3.9383	74.2277	343.962	4.23631	6.44853	2.21222	Up	Up	Up	2.45e-142	0	0	K08244|1|0.0|1306|ath:AT1G10760|alpha-glucan, water dikinase [EC:2.7.9.4]	GO:0009532//plastid stroma;GO:0009526//plastid envelope	GO:0032550;GO:0016301//kinase activity	GO:0005982//starch metabolic process;GO:0009409//response to cold;GO:0048511//rhythmic process;GO:0009608//response to symbiont;GO:0006796//phosphate-containing compound metabolic process	alpha-glucan water dikinase 1 [Arabidopsis thaliana]	ath:AT1G10760	SEX1
gi|158915725|gb|EX888289.1|EX888289	684	24	472	2934	10.8455	201.31	1153.08	4.21425	6.73226	2.518	Up	Up	Up	1.68e-101	0	0	-	-	-	-	-	None
gi|166118194|gb|FD551864.1|FD551864	481	44	837	1106	28.275	507.646	618.112	4.16622	4.45027	0.284046	Up	Up	Up	8.09e-179	2.65e-233	0.000168582	-	-	-	-	predicted protein [Arabidopsis lyrata subsp. lyrata]	None
CL9427.Contig1_NAU-YH	2730	266	4891	9011	30.1171	522.655	887.294	4.1172	4.88076	0.763552	Up	Up	Up	0	0	1.64e-200	K06617|1|0.0|1450|aly:ARALYDRAFT_907221|raffinose synthase [EC:2.4.1.82]	GO:0005911//cell-cell junction;GO:0044424//intracellular part	GO:0004557//alpha-galactosidase activity;GO:0008378//galactosyltransferase activity	GO:0009313//oligosaccharide catabolic process;GO:0009628//response to abiotic stimulus;GO:0006950//response to stress	putative imbibition protein [Brassica oleracea]	ath:AT3G57520	SIP2
Unigene8275_NAU-YH	616	33	601	693	16.5588	284.626	302.419	4.1034	4.19088	0.0874845	Up	Up	Up	6.23e-127	2.1e-140	0.523764	K01568|1|3e-90|328|ath:AT5G54960|pyruvate decarboxylase [EC:4.1.1.1]	GO:0009536//plastid	GO:0019842//vitamin binding;GO:0046872//metal ion binding;GO:0016831//carboxy-lyase activity	GO:0006996//organelle organization;GO:0051603//proteolysis involved in cellular protein catabolic process;GO:0009627//systemic acquired resistance;GO:0042743//hydrogen peroxide metabolic process;GO:0006006//glucose metabolic process	pyruvate decarboxylase [Arabidopsis thaliana]	ath:AT5G54960	PDC2
CL11450.Contig4_NAU-YH	1092	10	171	766	2.83056	45.6829	188.566	4.0125	6.05784	2.04534	Up	Up	Up	1.9e-35	2.53e-187	4e-78	K00688|1|3e-163|572|ath:AT3G29320|starch phosphorylase [EC:2.4.1.1]	-	GO:0043168;GO:0004645//phosphorylase activity	GO:0044238//primary metabolic process	glycosyl transferase, family 35 protein [Arabidopsis thaliana]	ath:AT3G29320
CL10953.Contig2_NAU-YH	1470	23	342	1029	4.83621	67.8718	188.172	3.81086	5.28203	1.47117	Up	Up	Up	2.83e-68	2.68e-238	2.8e-66	K15283|1|0.0|635|aly:ARALYDRAFT_678848|solute carrier family 35, member E1	GO:0031224//intrinsic to membrane;GO:0009536//plastid;GO:0031090//organelle membrane	GO:0015291//secondary active transmembrane transporter activity;GO:0015119;GO:0005342//organic acid transmembrane transporter activity	GO:0009642//response to light intensity;GO:0051707//response to other organism;GO:0006996//organelle organization;GO:0009746;GO:0015712//hexose phosphate transport;GO:0015717//triose phosphate transport;GO:0019953//sexual reproduction;GO:0009555//pollen development;GO:0034285;GO:0015979//photosynthesis;GO:0015718//monocarboxylic acid transport	glucose 6-Pi/Pi transporter [Eutrema halophilum]	ath:AT1G61800	GPT2
Unigene9637_NAU-YH	289	3	44	513	3.20862	44.4156	140.455	3.79104	5.45201	1.66097	Up	Up	Up	6.82e-09	3.56e-35	8.25e-12	K08244|1|6e-40|160|ath:AT1G10760|alpha-glucan, water dikinase [EC:2.7.9.4]	GO:0009532//plastid stroma;GO:0009526//plastid envelope	GO:0032550;GO:0016301//kinase activity	GO:0005982//starch metabolic process;GO:0009409//response to cold;GO:0048511//rhythmic process;GO:0009608//response to symbiont;GO:0006796//phosphate-containing compound metabolic process	Strong similarity to gb|Y09533 involved in starch metabolism from Solanum tuberosum and contains a PF|01326 Pyruvate phosphate dikinase, PEP/pyruvate binding domain. EST gb|N96757 comes from this gene [Arabidopsis thaliana]	ath:AT1G10760	SEX1
Unigene8094_NAU-YH	692	64	835	953	28.587	352.015	370.206	3.6222	3.6949	0.0726942	Up	Up	Up	2.75e-160	6.44e-176	0.515796	-	-	-	GO:0009725//response to hormone stimulus;GO:0044699;GO:0009628//response to abiotic stimulus;GO:0006950//response to stress	stress responsive protein [Brassica oleracea var. acephala]	ath:AT5G52300	LTI65
Unigene24939_NAU-YH	1430	69	867	2824	14.9145	176.874	530.867	3.56794	5.15357	1.58563	Up	Up	Up	2.38e-164	0	2.86e-203	K00975|1|4e-178|622|aly:ARALYDRAFT_899218|glucose-1-phosphate adenylyltransferase [EC:2.7.7.27]	GO:0009532//plastid stroma;GO:0030929;GO:0005576//extracellular region	GO:0070566//adenylyltransferase activity	GO:0009648//photoperiodism;GO:0005982//starch metabolic process;GO:0005977//glycogen metabolic process	RecName: Full=Glucose-1-phosphate adenylyltransferase small subunit, chloroplasti	ath:AT5G48300	ADG1
Unigene8382_NAU-YH	560	26	295	1110	14.3509	153.679	532.834	3.4207	5.21447	1.79377	Up	Up	Up	7.67e-54	1.47e-255	5.23e-95	-	GO:0005911//cell-cell junction;GO:0016020//membrane;GO:0005618//cell wall	GO:0016787//hydrolase activity;GO:0004857//enzyme inhibitor activity	GO:0043479;GO:0005976//polysaccharide metabolic process;GO:0045229//external encapsulating structure organization;GO:0032535//regulation of cellular component size;GO:0009826//unidimensional cell growth;GO:0048588//developmental cell growth;GO:0000097//sulfur amino acid biosynthetic process;GO:0006950//response to stress;GO:0010073//meristem maintenance;GO:0060918//auxin transport;GO:0019538//pro…	hypothetical protein ARALYDRAFT_484136 [Arabidopsis lyrata subsp. lyrata]	ath:AT2G02100	LCR69
gi|167444003|gb|FD949350.1|FD949350	730	25	278	357	10.5855	111.097	131.463	3.39166	3.63449	0.242833	Up	Up	Up	2.35e-50	6.43e-65	0.123603	K03062|1|2e-72|270|aly:ARALYDRAFT_480455|26S proteasome regulatory subunit T2	-	-	-	hypothetical protein ARALYDRAFT_480455 [Arabidopsis lyrata subsp. lyrata]	ath:AT2G20140
Unigene28147_NAU-YH	236	5	55	513	6.54867	67.9878	124.157	3.376	4.24482	0.868819	Up	Up	Up	4.3e-10	3.11e-22	0.00160767	-	-	-	-	-	None
CL4809.Contig3_NAU-YH	782	9	86	387	3.55738	32.0828	133.034	3.17291	5.22483	2.05192	Up	Up	Up	8.72e-15	6.85e-89	1.25e-39	-	GO:0043231//intracellular membrane-bounded organelle	-	-	CCT motif family protein [Arabidopsis thaliana]	ath:AT4G27900
Unigene18386_NAU-YH	1796	209	1961	2156	35.9695	318.531	322.7	3.14659	3.16535	0.0187618	Up	Up	Up	0	0	0.799046	K15336|1|2e-16|85.9|vvi:100259391|tRNA (cytosine38-C5)-methyltransferase [EC:2.1.1.204]	GO:0043231//intracellular membrane-bounded organelle;GO:0016020//membrane	-	GO:0009414//response to water deprivation;GO:0009725//response to hormone stimulus;GO:0009409//response to cold;GO:0006970//response to osmotic stress	pentatricopeptide repeat-containing protein [Arabidopsis thaliana]	ath:AT2G15980
CL11784.Contig1_NAU-YH	2016	125	1168	1814	19.1652	169.018	241.882	3.14061	3.65774	0.517128	Up	Up	Up	2.3e-197	0	2.42e-20	K08244|1|0.0|1071|ath:AT1G10760|alpha-glucan, water dikinase [EC:2.7.9.4]	GO:0009532//plastid stroma;GO:0009526//plastid envelope	GO:0032550;GO:0004672//protein kinase activity	GO:0005982//starch metabolic process;GO:0009409//response to cold;GO:0048511//rhythmic process;GO:0009608//response to symbiont;GO:0006796//phosphate-containing compound metabolic process	Strong similarity to gb|Y09533 involved in starch metabolism from Solanum tuberosum and contains a PF|01326 Pyruvate phosphate dikinase, PEP/pyruvate binding domain. EST gb|N96757 comes from this gene [Arabidopsis thaliana]	ath:AT1G10760	SEX1
gnl|UG|Rsa#S42049326	1126	18	164	426	4.94116	42.4899	101.702	3.1042	4.36335	1.25915	Up	Up	Up	2.03e-27	1.5e-88	9.06e-22	K09872|1|4e-144|509|aly:ARALYDRAFT_482707|aquaporin PIP	GO:0005911//cell-cell junction;GO:0009536//plastid;GO:0031224//intrinsic to membrane	GO:0044389;GO:0005372//water transmembrane transporter activity	GO:0009414//response to water deprivation;GO:0006007//glucose catabolic process;GO:0006996//organelle organization;GO:0006970//response to osmotic stress;GO:0010038//response to metal ion;GO:0070838//divalent metal ion transport;GO:0009746;GO:0048588//developmental cell growth;GO:0000041//transition metal ion transport;GO:0000097//sulfur amino acid biosynthetic process;GO:0055085//transmembrane t…	Plasma membrane aquaporin (PAQ2) [Raphanus sativus]	ath:AT3G53420	PIP2A
gi|161573946|gb|EY944421.1|EY944421	691	39	352	819	17.4454	148.609	318.613	3.0906	4.19088	1.10028	Up	Up	Up	1.71e-58	5.21e-166	1.17e-33	-	GO:0031224//intrinsic to membrane;GO:0009527//plastid outer membrane	GO:0008320//protein transmembrane transporter activity;GO:0046943//carboxylic acid transmembrane transporter activity	GO:0006952//defense response;GO:0009725//response to hormone stimulus;GO:0009746;GO:0044743;GO:0034285	hypothetical protein ARALYDRAFT_481805 [Arabidopsis lyrata subsp. lyrata]	ath:AT2G28900	OEP16-1
Unigene755_NAU-YH	262	4	34	513	4.71904	37.858	116.966	3.00403	4.63146	1.62742	Up	Up	Up	8.44e-06	1.67e-24	9.1e-09	-	-	-	-	-	None
Unigene5965_NAU-YH	766	46	377	439	18.562	143.58	154.061	2.95143	3.05308	0.101651	Up	Up	Up	7.58e-60	2.72e-68	0.556282	-	-	-	-	-	None
Unigene24646_NAU-YH	828	45	364	423	16.7988	128.248	137.331	2.93251	3.03123	0.0987134	Up	Up	Up	2.04e-57	2.41e-65	0.580379	-	GO:0005911//cell-cell junction;GO:0005856//cytoskeleton;GO:0005618//cell wall;GO:0044444//cytoplasmic part;GO:0016020//membrane	GO:0052689	GO:0006694//steroid biosynthetic process;GO:0006996//organelle organization	Pectinacetylesterase family protein [Arabidopsis thaliana]	ath:AT4G19410
CL1736.Contig2_NAU-YH	879	41	326	1142	14.4175	108.195	349.248	2.90775	4.59836	1.69061	Up	Up	Up	5.61e-51	8.56e-246	5.34e-90	-	GO:0009706//chloroplast inner membrane;GO:0009534//chloroplast thylakoid	-	GO:0009725//response to hormone stimulus;GO:0009414//response to water deprivation;GO:0009409//response to cold;GO:0006972//hyperosmotic response;GO:0006873//cellular ion homeostasis;GO:0030001//metal ion transport	cold regulated 314 thylakoid membrane 2 [Arabidopsis thaliana]	ath:AT1G29390	COR314-TM2
CL2483.Contig1_NAU-YH	1255	38	291	691	9.35911	67.6441	148.01	2.85352	3.98318	1.12966	Up	Up	Up	1.22e-44	4.7e-135	1.17e-29	K08244|1|0.0|777|ath:AT1G10760|alpha-glucan, water dikinase [EC:2.7.9.4]	GO:0009532//plastid stroma;GO:0009526//plastid envelope	GO:0032550;GO:0004672//protein kinase activity	GO:0005982//starch metabolic process;GO:0009409//response to cold;GO:0048511//rhythmic process;GO:0009608//response to symbiont;GO:0006796//phosphate-containing compound metabolic process	F20B24.19 [Arabidopsis thaliana]	ath:AT1G10760	SEX1
Unigene20532_NAU-YH	900	460	3368	4000	157.983	1091.72	1194.74	2.78876	2.91886	0.130102	Up	Up	Up	0	0	0.000971078	-	GO:0016020//membrane	-	-	protein SPIRAL1-like2 [Arabidopsis thaliana]	ath:AT1G69230	SP1L2
CL7197.Contig1_NAU-YH	900	10	73	772	3.43441	23.6625	230.585	2.78447	6.06909	3.28463	Up	Up	Up	3.97e-11	6.56e-189	1.14e-133	-	-	-	-	-	None
Unigene21707_NAU-YH	2550	1	7	27634	0.121215	0.800826	2913.14	2.72393	14.5527	11.8288	Up	Up	Up	0.141239	0	0	-	-	-	-	-	None
CL792.Contig1_NAU-YH	2046	66	433	1328	9.97087	61.7394	174.482	2.6304	4.12921	1.49881	Up	Up	Up	7.74e-61	1.19e-266	6.01e-88	K00688|1|0.0|1065|ath:AT3G29320|starch phosphorylase [EC:2.4.1.1]	-	GO:0043168;GO:0004645//phosphorylase activity	GO:0044238//primary metabolic process	glycosyl transferase, family 35 protein [Arabidopsis thaliana]	ath:AT3G29320
CL11188.Contig2_NAU-YH	319	14	91	208	13.5654	83.2207	175.279	2.61701	3.69165	1.07464	Up	Up	Up	6.38e-13	2.74e-38	1.62e-08	-	GO:0005576//extracellular region	GO:0008233//peptidase activity	GO:0033554//cellular response to stress;GO:0009814//defense response, incompatible interaction;GO:0007243//intracellular protein kinase cascade	nucleoid DNA-binding protein cnd41-like protein [Arabidopsis thaliana]	ath:AT5G10770
gi|332792788|gb|FY451566.1|FY451566	829	76	494	747	28.337	173.841	242.227	2.61701	3.0956	0.478591	Up	Up	Up	5.2e-69	8.14e-118	1.44e-07	K00924|1|2e-12|70.9|aly:ARALYDRAFT_489138|[EC:2.7.1.-]	GO:0005576//extracellular region	GO:0004175//endopeptidase activity	GO:0019538//protein metabolic process;GO:0033554//cellular response to stress;GO:0009814//defense response, incompatible interaction;GO:0007243//intracellular protein kinase cascade	hypothetical protein ARALYDRAFT_325615 [Arabidopsis lyrata subsp. lyrata]	ath:AT5G10770
Unigene30421_NAU-YH	886	68	438	1063	23.723	144.218	322.52	2.6039	3.76503	1.16113	Up	Up	Up	7.53e-61	3.37e-199	1.46e-47	-	-	-	-	-	None
Unigene30473_NAU-YH	282	9	57	513	9.8648	58.9666	125.829	2.57954	3.67304	1.0935	Up	Up	Up	3.96e-08	3.01e-24	9.52e-06	-	-	-	-	-	None
Unigene30458_NAU-YH	334	25	153	513	23.136	133.637	136.018	2.5301	2.55559	0.0254858	Up	Up	Up	1.04e-20	5.82e-22	0.948894	-	GO:0043231//intracellular membrane-bounded organelle	GO:0016741	GO:0008152//metabolic process	dehydration-responsive family protein [Arabidopsis lyrata subsp. lyrata]	ath:AT1G26850
gi|166127525|gb|FD559645.1|FD559645	704	21	126	309	9.22022	52.213	117.989	2.50153	3.67771	1.17618	Up	Up	Up	6.77e-17	1.01e-56	2.59e-14	K03094|1|5e-07|52.8|mtr:MTR_5g022730|S-phase kinase-associated protein 1	-	-	-	PREDICTED: SKP1-like protein 1A-like isoform 2 [Solanum lycopersicum]	None
gi|161578670|gb|EY950155.1|EY950155	643	35	180	257	16.8249	81.6661	107.443	2.27914	2.67491	0.395766	Up	Up	Up	1.52e-21	6.14e-35	0.0242074	K12449|1|8e-97|350|aly:ARALYDRAFT_470881|UDP-apiose/xylose synthase	-	-	-	UDP-D-apioseUDP-D-xylose synthase 2 [Arabidopsis lyrata subsp. lyrata]	ath:AT1G08200	AXS2
CL4025.Contig1_NAU-YH	654	69	341	375	32.6112	152.11	154.138	2.22168	2.24079	0.019113	Up	Up	Up	2.41e-39	1.61e-41	0.93687	-	GO:0043231//intracellular membrane-bounded organelle;GO:0044444//cytoplasmic part	-	-	hypothetical protein [Arabidopsis thaliana]	ath:AT5G40450
CL5373.Contig1_NAU-YH	641	76	360	678	36.648	163.842	284.334	2.1605	2.95578	0.795283	Up	Up	Up	4.11e-40	3.57e-102	2.23e-16	-	-	-	-	hypothetical protein ARALYDRAFT_478694 [Arabidopsis lyrata subsp. lyrata]	ath:AT3G13175
Unigene24458_NAU-YH	382	19	89	513	15.3739	67.9684	100.631	2.14438	2.71051	0.566132	Up	Up	Up	4.17e-10	7.66e-20	0.0185131	-	GO:0005618//cell wall;GO:0005911//cell-cell junction	GO:0005198//structural molecule activity	-	leucine-rich repeat extensin-like protein 5 [Arabidopsis thaliana]	ath:AT3G24480
Unigene29107_NAU-YH	884	47	213	353	16.4339	70.2923	107.344	2.09669	2.7075	0.610809	Up	Up	Up	5.79e-23	1.48e-48	1.03e-05	-	GO:0043231//intracellular membrane-bounded organelle	GO:0003676//nucleic acid binding;GO:0005515//protein binding	GO:0006351//transcription, DNA-dependent	calmodulin-binding transcription activator 5 [Arabidopsis thaliana]	ath:AT4G16150
CL216.Contig1_NAU-YH	1282	203	917	1538	48.9444	208.671	322.497	2.09201	2.72007	0.628056	Up	Up	Up	6.27e-98	1.13e-212	2.12e-24	K08235|1|9e-164|574|ath:AT2G36870|xyloglucan:xyloglucosyl transferase [EC:2.4.1.207]	GO:0005576//extracellular region;GO:0030312//external encapsulating structure	GO:0016798//hydrolase activity, acting on glycosyl bonds;GO:0016758//transferase activity, transferring hexosyl groups	GO:0044042//glucan metabolic process;GO:0044036//cell wall macromolecule metabolic process;GO:0044085	xyloglucan:xyloglucosyl transferase [Arabidopsis thaliana]	ath:AT3G44990	XTR8
Unigene27582_NAU-YH	1228	59	266	2963	14.8508	63.1922	648.62	2.08921	5.44877	3.35955	Up	Up	Up	1.75e-28	0	0	K01188|1|5e-95|346|vvi:100252705|beta-glucosidase [EC:3.2.1.21]	GO:0043231//intracellular membrane-bounded organelle	GO:0004553//hydrolase activity, hydrolyzing O-glycosyl compounds;GO:0043169//cation binding	GO:0044238//primary metabolic process	myrosinase, thioglucoside glucohydrolase [Brassica napus]	ath:AT5G25980	TGG2
Unigene30166_NAU-YH	2026	36	160	1046	5.49235	23.0389	138.787	2.06857	4.65931	2.59073	Up	Up	Up	4.73e-17	7.55e-227	3.8e-142	-	GO:0044424//intracellular part	GO:0003676//nucleic acid binding;GO:0004674//protein serine/threonine kinase activity;GO:0032550	-	ATP binding protein [Arabidopsis lyrata subsp. lyrata]	ath:AT3G48770
gi|166139370|gb|FD570326.1|FD570326	655	34	151	328	16.0447	67.2537	134.614	2.06751	3.06866	1.00114	Up	Up	Up	4.17e-16	2.81e-51	8.71e-12	K13680|1|2e-84|308|aly:ARALYDRAFT_489123|beta-mannan synthase [EC:2.4.1.32]	GO:0043231//intracellular membrane-bounded organelle	GO:0019187//beta-1,4-mannosyltransferase activity;GO:0016759//cellulose synthase activity	-	hypothetical protein ARALYDRAFT_489123 [Arabidopsis lyrata subsp. lyrata]	ath:AT5G22740	CSLA02
CL43.Contig4_NAU-YH	1347	210	891	982	48.1888	192.97	195.975	2.00161	2.0239	0.0222918	Up	Up	Up	7.23e-90	1.75e-95	0.839078	K03257|1|0.0|743|aly:ARALYDRAFT_672248|translation initiation factor 4A	GO:0030312//external encapsulating structure;GO:0031981//nuclear lumen;GO:0005911//cell-cell junction;GO:0044444//cytoplasmic part;GO:0031090//organelle membrane;GO:0005576//extracellular region	GO:0032550;GO:0042623//ATPase activity, coupled;GO:0008135//translation factor activity, nucleic acid binding	GO:0006007//glucose catabolic process;GO:0006412//translation;GO:0010038//response to metal ion;GO:0006970//response to osmotic stress	predicted protein [Arabidopsis lyrata subsp. lyrata]	ath:AT3G13920	EIF4A1
CL6177.Contig1_NAU-YH	2762	322	1347	2226	36.0352	142.274	216.65	1.98119	2.58789	0.606698	Up	Up	Up	5.02e-134	1.65e-291	4.24e-33	K00696|1|0.0|1442|aly:ARALYDRAFT_488935|sucrose-phosphate synthase [EC:2.4.1.14]	GO:0005911//cell-cell junction;GO:0044444//cytoplasmic part;GO:0016020//membrane	GO:0035251//UDP-glucosyltransferase activity	GO:0005984//disaccharide metabolic process	sucrose phosphate synthase 1F [Arabidopsis lyrata subsp. lyrata]	ath:AT5G20280	SPS1F
Unigene23338_NAU-YH	2809	97	401	1866	10.6737	41.646	178.574	1.96412	4.06439	2.10027	Up	Up	Up	1.59e-39	0	3.54e-197	K00700|1|0.0|1544|ath:AT2G36390|1,4-alpha-glucan branching enzyme [EC:2.4.1.18]	GO:0009532//plastid stroma	GO:0016758//transferase activity, transferring hexosyl groups;GO:0016798//hydrolase activity, acting on glycosyl bonds;GO:0043167//ion binding	GO:0006007//glucose catabolic process;GO:0006090//pyruvate metabolic process;GO:0005984//disaccharide metabolic process;GO:0005977//glycogen metabolic process;GO:0009059//macromolecule biosynthetic process;GO:0005982//starch metabolic process;GO:0044093;GO:0019757;GO:0071555//cell wall organization	1,4-alpha-glucan branching enzyme [Arabidopsis thaliana]	ath:AT2G36390	SBE2.1
Unigene178_NAU-YH	1127	96	391	994	26.3295	101.212	237.093	1.94263	3.17071	1.22807	Up	Up	Up	5.4e-38	1.78e-160	1.37e-48	-	-	-	-	-	None
CL10345.Contig3_NAU-YH	933	382	1554	2249	126.554	485.903	647.985	1.94091	2.35621	0.415291	Up	Up	Up	1.77e-150	2.78e-264	6.27e-17	-	-	-	-	-	None
gi|158664162|gb|EX774053.1|EX774053	567	41	166	267	22.3509	85.4094	126.586	1.93406	2.50171	0.567651	Up	Up	Up	3.13e-16	1.03e-33	0.00053678	K00134|1|4e-71|265|aly:ARALYDRAFT_471499|glyceraldehyde 3-phosphate dehydrogenase [EC:1.2.1.12]	GO:0031981//nuclear lumen;GO:0005911//cell-cell junction;GO:0009536//plastid;GO:0005576//extracellular region;GO:0031090//organelle membrane;GO:0030312//external encapsulating structure;GO:0031967	GO:0046914//transition metal ion binding;GO:0016620//oxidoreductase activity, acting on the aldehyde or oxo group of donors, NAD or NADP as acceptor;GO:0000166//nucleotide binding	GO:0051603//proteolysis involved in cellular protein catabolic process;GO:0034285;GO:0006007//glucose catabolic process;GO:0006090//pyruvate metabolic process;GO:0009791//post-embryonic development;GO:0000302//response to reactive oxygen species;GO:0048608//reproductive structure development;GO:0006996//organelle organization;GO:0006970//response to osmotic stress;GO:0019758;GO:0045333//cellular …	glyceraldehyde 3-phosphate dehydrogenase [Arabidopsis thaliana]	ath:AT3G04120	GAPC1
Unigene17677_NAU-YH	498	76	303	853	47.1714	177.498	460.444	1.91182	3.28704	1.37522	Up	Up	Up	6.86e-29	2.33e-142	1.16e-49	K03539|1|5e-12|68.6|bdi:100830772|ribonuclease P/MRP protein subunit RPP1 [EC:3.1.26.5];K12135|3|9e-08|54.3|aly:ARALYDRAFT_488429|zinc finger protein CONSTANS;K12129|4|6e-07|51.6|zma:100280240|pseudo-response regulator 7	GO:0043231//intracellular membrane-bounded organelle	-	-	CCT motif family protein [Arabidopsis thaliana]	ath:AT5G53420
Unigene30404_NAU-YH	743	49	194	680	20.3846	76.1717	246.024	1.90177	3.59325	1.69147	Up	Up	Up	1.73e-18	1.28e-122	1.29e-53	-	GO:0009536//plastid	-	GO:0009725//response to hormone stimulus;GO:0007275//multicellular organismal development;GO:0006950//response to stress	protein DROUGHT-INDUCED 21 [Arabidopsis thaliana]	ath:AT4G15910	DI21
CL4945.Contig1_NAU-YH	2674	138	535	1182	15.9519	58.3677	118.826	1.87144	2.89706	1.02561	Up	Up	Up	2.16e-49	1.28e-174	2.76e-43	K05666|1|1e-90|333|olu:OSTLU_35503|ATP-binding cassette, subfamily C (CFTR/MRP), member 2;K05658|3|4e-31|135|aly:ARALYDRAFT_472995|ATP-binding cassette, subfamily B (MDR/TAP), member 1	GO:0005773//vacuole;GO:0031224//intrinsic to membrane	GO:0032550;GO:0017111//nucleoside-triphosphatase activity;GO:0015405	GO:0006810//transport;GO:0044763;GO:0050896//response to stimulus;GO:0009154//purine ribonucleotide catabolic process	ATMRP10 [Arabidopsis lyrata subsp. lyrata]	ath:AT3G62700	MRP10
Unigene27954_NAU-YH	406	16	62	513	12.1812	44.5498	120.504	1.87077	3.30636	1.43559	Up	Up	Up	3.96e-06	1.5e-30	1.57e-11	-	-	GO:0017111//nucleoside-triphosphatase activity	-	ABC transporter C family member 14 [Arabidopsis thaliana]	ath:AT3G62700	MRP10
Unigene7502_NAU-YH	1175	119	459	645	31.3043	113.961	147.564	1.8641	2.2369	0.372799	Up	Up	Up	3.57e-42	3.62e-71	0.000215798	K03260|1|2e-123|440|aly:ARALYDRAFT_495887|translation initiation factor 4G	GO:0043231//intracellular membrane-bounded organelle;GO:0044444//cytoplasmic part	GO:0008135//translation factor activity, nucleic acid binding	GO:0006412//translation	eukaryotic initiation factor 4, eIF4-like protein [Arabidopsis thaliana]	ath:AT5G57870	eIFiso4G1
CL9678.Contig1_NAU-YH	1641	195	745	1868	36.73	132.443	306.003	1.85034	3.05851	1.20818	Up	Up	Up	1.13e-67	1.71e-291	5.53e-89	K10999|1|0.0|711|aly:ARALYDRAFT_491486|cellulose synthase A [EC:2.4.1.12]	GO:0043231//intracellular membrane-bounded organelle;GO:0031224//intrinsic to membrane	GO:0046914//transition metal ion binding;GO:0016759//cellulose synthase activity	GO:0032989;GO:0030243//cellulose metabolic process;GO:0006007//glucose catabolic process;GO:0006972//hyperosmotic response;GO:0006996//organelle organization;GO:0016192//vesicle-mediated transport;GO:0010038//response to metal ion;GO:0070838//divalent metal ion transport;GO:0009746;GO:0048588//developmental cell growth;GO:0009832//plant-type cell wall biogenesis;GO:0042044//fluid transport;GO:007…	cellulose synthase 1.2 catalytic subunit [Brassica napus]	ath:AT4G32410	CESA1
CL5033.Contig1_NAU-YH	2150	462	1765	2958	66.4199	239.49	369.843	1.85028	2.47722	0.626948	Up	Up	Up	2.92e-160	0	1.45e-46	K04646|1|0.0|1377|aly:ARALYDRAFT_478454|clathrin heavy chain	GO:0012510//trans-Golgi network transport vesicle membrane;GO:0009536//plastid;GO:0005905//coated pit;GO:0005911//cell-cell junction	GO:0005488//binding	GO:0016192//vesicle-mediated transport;GO:0015031//protein transport	hypothetical protein ARALYDRAFT_478454 [Arabidopsis lyrata subsp. lyrata]	ath:AT3G11130
CL12046.Contig1_NAU-YH	2046	112	427	785	16.9203	60.8839	103.139	1.84731	2.60776	0.760451	Up	Up	Up	8.94e-39	1.31e-103	1.6e-17	K03347|1|0.0|1194|aly:ARALYDRAFT_911957|cullin 1	GO:0015630//microtubule cytoskeleton;GO:0000151//ubiquitin ligase complex;GO:0000228//nuclear chromosome;GO:0009526//plastid envelope	GO:0044389	GO:0006865//amino acid transport;GO:0009888//tissue development;GO:0009793//embryo development ending in seed dormancy;GO:0010467//gene expression;GO:0048827//phyllome development;GO:0009755//hormone-mediated signaling pathway;GO:0016482//cytoplasmic transport;GO:0044702;GO:0051726//regulation of cell cycle;GO:0007059//chromosome segregation;GO:0006498//N-terminal protein lipidation;GO:0030154//c…	ATCUL1 [Arabidopsis lyrata subsp. lyrata]	ath:AT4G02570	CUL1
gi|332787910|gb|FY445312.1|FY445312	428	87	327	508	62.8305	222.887	319.063	1.82678	2.34431	0.517532	Up	Up	Up	2.56e-29	2.48e-59	4.57e-06	K01115|1|5e-71|263|ath:AT3G15730|phospholipase D [EC:3.1.4.4]	-	-	-	RecName: Full=Phospholipase D alpha 1; Short=PLD 1; Choline phosphatase 1; Phosphatidylcholine-hydrolyzing phospholipase D 1; Flags: Precursor	ath:AT3G15730	PLDALPHA1
Unigene6063_NAU-YH	736	52	195	300	21.8384	77.2925	109.572	1.82346	2.32695	0.503483	Up	Up	Up	1.4e-17	8.41e-35	0.00110429	-	GO:0016020//membrane	GO:0032550;GO:0004672//protein kinase activity	GO:0010243//response to organic nitrogen;GO:0009267//cellular response to starvation;GO:0042742//defense response to bacterium;GO:0006464//cellular protein modification process;GO:0006984//ER-nucleus signaling pathway	putative cysteine-rich receptor-like protein kinase 35 [Arabidopsis thaliana]	ath:AT4G11530	CRK34
Unigene15929_NAU-YH	866	82	307	453	29.2678	103.419	140.617	1.82111	2.26438	0.443267	Up	Up	Up	2e-27	9.26e-51	0.000285034	-	-	-	-	-	None
Unigene30162_NAU-YH	1193	59	220	595	15.2864	53.7976	134.071	1.81529	3.13267	1.31738	Up	Up	Up	1.15e-19	6.55e-95	1.74e-32	-	-	GO:0016740//transferase activity;GO:1901363;GO:0097159//organic cyclic compound binding	-	ATP binding protein [Arabidopsis lyrata subsp. lyrata]	ath:AT3G48770
gi|158659596|gb|EX769487.1|EX769487	782	191	704	971	75.4956	262.631	333.787	1.79857	2.14446	0.34589	Up	Up	Up	1.59e-61	1.19e-101	1.47e-05	-	-	-	GO:0060918//auxin transport;GO:0000097//sulfur amino acid biosynthetic process;GO:0043479;GO:0032535//regulation of cellular component size;GO:0045229//external encapsulating structure organization;GO:0048588//developmental cell growth;GO:0005976//polysaccharide metabolic process;GO:0009826//unidimensional cell growth;GO:0007275//multicellular organismal development	extensin-like protein [Arabidopsis thaliana]	ath:AT1G12090	ELP
Unigene29840_NAU-YH	1879	368	1344	2402	60.5363	208.667	343.64	1.78533	2.50502	0.719697	Up	Up	Up	3.44e-116	2.57e-303	3.22e-48	K10999|1|0.0|1146|ath:AT5G05170|cellulose synthase A [EC:2.4.1.12]	GO:0005911//cell-cell junction;GO:0043231//intracellular membrane-bounded organelle;GO:0031224//intrinsic to membrane	GO:0046914//transition metal ion binding;GO:0016759//cellulose synthase activity	GO:0043479;GO:0007275//multicellular organismal development;GO:0030243//cellulose metabolic process;GO:0045229//external encapsulating structure organization;GO:0006007//glucose catabolic process;GO:0006694//steroid biosynthetic process;GO:0032535//regulation of cellular component size;GO:0009826//unidimensional cell growth;GO:0006996//organelle organization;GO:0006970//response to osmotic stress…	cellulose synthase 3.1 catalytic subunit [Brassica napus]	ath:AT5G05170	CEV1
Unigene12985_NAU-YH	1725	122	444	1090	21.8608	75.0887	169.861	1.78025	2.95794	1.17769	Up	Up	Up	2.49e-38	1.88e-164	7.12e-50	K02083|1|4e-48|191|ppp:PHYPADRAFT_111019|allantoate deiminase [EC:3.5.3.9]	GO:0043231//intracellular membrane-bounded organelle	GO:0070011//peptidase activity, acting on L-amino acid peptides;GO:0016813//hydrolase activity, acting on carbon-nitrogen (but not peptide) bonds, in linear amidines	GO:0000097//sulfur amino acid biosynthetic process;GO:0008380//RNA splicing;GO:0019538//protein metabolic process;GO:0000255//allantoin metabolic process	ureidoglycolate amidohydrolase [Arabidopsis thaliana]	ath:AT5G43600	UAH
Unigene30469_NAU-YH	1066	77	280	690	22.3269	76.6269	174	1.77907	2.96223	1.18316	Up	Up	Up	2.93e-24	3.3e-104	7.37e-32	-	GO:0043231//intracellular membrane-bounded organelle;GO:0016020//membrane	-	GO:0048764;GO:0044085	Remorin family protein [Arabidopsis thaliana]	ath:AT5G23750
gi|332769764|gb|FY429856.1|FY429856	285	31	112	228	33.6211	114.645	215.054	1.76973	2.67726	0.907529	Up	Up	Up	6.69e-10	4.67e-31	3.7e-07	K03234|1|1e-38|155|mtr:MTR_2g069310|elongation factor 2	-	-	-	elongation factor EF-2 [Arabidopsis thaliana]	ath:AT1G56070	LOS
CL3650.Contig1_NAU-YH	6897	395	1403	2893	17.7024	59.3442	112.757	1.74516	2.67121	0.926045	Up	Up	Up	1.63e-117	0	2.22e-89	K12856|1|0.0|3323|ath:AT1G80070|pre-mRNA-processing factor 8	GO:0009536//plastid;GO:0005618//cell wall;GO:0030529//ribonucleoprotein complex	GO:0035251//UDP-glucosyltransferase activity	GO:0007010//cytoskeleton organization;GO:0006073//cellular glucan metabolic process;GO:0009791//post-embryonic development;GO:0030422//production of siRNA involved in RNA interference;GO:0006342//chromatin silencing;GO:0044702;GO:0007154//cell communication;GO:0009933//meristem structural organization;GO:0005985//sucrose metabolic process;GO:0006498//N-terminal protein lipidation;GO:0009606//trop…	Pre-mRNA-processing-splicing factor [Arabidopsis thaliana]	ath:AT1G80070	SUS2
Unigene24503_NAU-YH	1648	41	142	887	7.68991	25.1369	144.685	1.70877	4.2338	2.52504	Up	Up	Up	7.39e-12	4.54e-181	4.85e-117	K00827|1|0.0|889|aly:ARALYDRAFT_903067|alanine-glyoxylate transaminase / (R)-3-amino-2-methylpropionate-pyruvate transaminase [EC:2.6.1.44 2.6.1.40]	GO:0043231//intracellular membrane-bounded organelle	GO:0043168;GO:0008483//transaminase activity	-	alanine:glyoxylate aminotransferase 3 [Arabidopsis thaliana]	ath:AT2G38400	AGT3
Unigene30623_NAU-YH	258	10	34	513	11.9805	38.445	139.618	1.68211	3.54273	1.86062	Up	Up	Up	0.00303997	6.58e-24	3.05e-12	-	-	-	-	-	None
gi|154259095|gb|EV570116.1|EV570116	829	82	271	405	30.5741	95.3664	131.328	1.64117	2.10279	0.461623	Up	Up	Up	5.12e-21	1.97e-41	0.000384837	K00134|1|1e-101|322|gmx:100810217|glyceraldehyde 3-phosphate dehydrogenase [EC:1.2.1.12]	GO:0031981//nuclear lumen;GO:0005911//cell-cell junction;GO:0009536//plastid;GO:0005576//extracellular region;GO:0031090//organelle membrane;GO:0030312//external encapsulating structure;GO:0031967	GO:0046914//transition metal ion binding;GO:0016620//oxidoreductase activity, acting on the aldehyde or oxo group of donors, NAD or NADP as acceptor;GO:0000166//nucleotide binding	GO:0051603//proteolysis involved in cellular protein catabolic process;GO:0034285;GO:0006007//glucose catabolic process;GO:0006090//pyruvate metabolic process;GO:0009791//post-embryonic development;GO:0000302//response to reactive oxygen species;GO:0048608//reproductive structure development;GO:0006996//organelle organization;GO:0006970//response to osmotic stress;GO:0019758;GO:0045333//cellular …	RecName: Full=Glyceraldehyde-3-phosphate dehydrogenase, cytosolic	ath:AT3G04120	GAPC1
CL14025.Contig1_NAU-YH	2222	143	469	1116	19.8924	61.5757	135.014	1.63014	2.76282	1.13267	Up	Up	Up	8.64e-36	6.97e-157	5.42e-48	K01681|1|0.0|1271|rcu:RCOM_0782740|aconitate hydratase 1 [EC:4.2.1.3]	GO:0005911//cell-cell junction;GO:0005576//extracellular region;GO:0009532//plastid stroma;GO:0031090//organelle membrane;GO:0030312//external encapsulating structure	GO:0046914//transition metal ion binding;GO:0032550;GO:0051536//iron-sulfur cluster binding;GO:0016705//oxidoreductase activity, acting on paired donors, with incorporation or reduction of molecular oxygen;GO:0016641//oxidoreductase activity, acting on the CH-NH2 group of donors, oxygen as acceptor;GO:0003994//aconitate hydratase activity;GO:0003729//mRNA binding	GO:0034614//cellular response to reactive oxygen species;GO:0055080//cation homeostasis;GO:0072350//tricarboxylic acid metabolic process;GO:0006007//glucose catabolic process;GO:0035966//response to topologically incorrect protein;GO:0043094;GO:0070542//response to fatty acid;GO:0010039//response to iron ion;GO:0009692;GO:0006996//organelle organization;GO:0006970//response to osmotic stress;GO:0…	aconitate hydratase 1 [Arabidopsis thaliana]	ath:AT2G05710	ACO3
Unigene30370_NAU-YH	1198	600	1959	4449	154.807	477.044	998.304	1.62365	2.68901	1.06536	Up	Up	Up	3.83e-148	0	2.34e-173	K09872|1|2e-155|546|ath:AT4G00430|aquaporin PIP	GO:0005911//cell-cell junction;GO:0031224//intrinsic to membrane;GO:0009526//plastid envelope	GO:0005372//water transmembrane transporter activity;GO:0005488//binding	GO:0006007//glucose catabolic process;GO:0006996//organelle organization;GO:0006970//response to osmotic stress;GO:0006637//acyl-CoA metabolic process;GO:0016129;GO:0010038//response to metal ion;GO:0070838//divalent metal ion transport;GO:0009746;GO:0000041//transition metal ion transport;GO:0009267//cellular response to starvation;GO:0042044//fluid transport	plasma membrane intrinsic protein 1;4 [Arabidopsis thaliana]	ath:AT4G00430	PIP1;4
Unigene27955_NAU-YH	257	12	39	513	14.4325	44.2702	117.15	1.61701	3.02096	1.40395	Up	Up	Up	0.00181699	2.13e-17	4.77e-07	-	GO:0005773//vacuole;GO:0031224//intrinsic to membrane	GO:0032550;GO:0017111//nucleoside-triphosphatase activity;GO:0016491//oxidoreductase activity;GO:0015405	GO:0044763;GO:0044765;GO:0009154//purine ribonucleotide catabolic process;GO:0006950//response to stress	ATMRP10 [Arabidopsis lyrata subsp. lyrata]	ath:AT3G62700	MRP10
gi|166145543|gb|FD577271.1|FD577271	688	55	177	257	24.7098	75.0525	100.416	1.60282	2.02283	0.420013	Up	Up	Up	1.95e-13	3.81e-25	0.0155496	K03234|1|3e-111|399|aly:ARALYDRAFT_892631|elongation factor 2	GO:0031981//nuclear lumen;GO:0005911//cell-cell junction;GO:0009536//plastid;GO:0005576//extracellular region;GO:0031090//organelle membrane	GO:0046914//transition metal ion binding;GO:0032550;GO:0017111//nucleoside-triphosphatase activity;GO:0008135//translation factor activity, nucleic acid binding	GO:0006412//translation;GO:0009154//purine ribonucleotide catabolic process;GO:0006950//response to stress	elongation factor EF-2-like protein LOS1 [Arabidopsis thaliana]	ath:AT1G56070	LOS1
Unigene16232_NAU-YH	396	31	98	368	24.197	72.1957	249.81	1.57709	3.36793	1.79085	Up	Up	Up	1.65e-07	1.01e-62	1.86e-31	-	GO:0043231//intracellular membrane-bounded organelle	-	-	hypothetical protein [Arabidopsis thaliana]	ath:AT3G13980
CL1788.Contig5_NAU-YH	463	35	108	513	23.3659	68.0492	102.766	1.54218	2.13689	0.594712	Up	Up	Up	5.59e-08	1.13e-18	0.00449925	K11000|1|3e-85|311|aly:ARALYDRAFT_482124|callose synthase [EC:2.4.1.-]	GO:0043234//protein complex;GO:0005911//cell-cell junction;GO:0044444//cytoplasmic part;GO:0016020//membrane	GO:0035251//UDP-glucosyltransferase activity	GO:0052386//cell wall thickening;GO:0006074//(1->3)-beta-D-glucan metabolic process;GO:0016044//cellular membrane organization;GO:0009555//pollen development;GO:0042743//hydrogen peroxide metabolic process;GO:0003006//developmental process involved in reproduction;GO:0070646//protein modification by small protein removal	callose synthase [Arabidopsis thaliana]	ath:AT1G05570	CALS1
Unigene17980_NAU-YH	593	378	1159	1826	197.03	570.176	827.758	1.53299	2.07079	0.5378	Up	Up	Up	1.17e-80	7.13e-183	5.87e-22	-	-	-	-	-	None
CL3519.Contig2_NAU-YH	1794	135	411	901	23.2598	66.8344	135.008	1.52275	2.53713	1.01438	Up	Up	Up	1.76e-28	2.58e-115	1.9e-32	K01590|1|0.0|874|ath:AT1G43710|histidine decarboxylase [EC:4.1.1.22]	GO:0044444//cytoplasmic part;GO:0016020//membrane	GO:0016831//carboxy-lyase activity;GO:0043168	GO:0042439//ethanolamine-containing compound metabolic process;GO:0003006//developmental process involved in reproduction;GO:0019752//carboxylic acid metabolic process	serine decarboxylase [Arabidopsis thaliana]	ath:AT1G43710	emb1075
CL11188.Contig1_NAU-YH	201	5	15	513	7.68898	21.7709	132.403	1.50153	4.10599	2.60446	Up	Up	Up	0.114454	9.14e-20	1.3e-13	-	GO:0005576//extracellular region	GO:0004175//endopeptidase activity	GO:0019538//protein metabolic process;GO:0033554//cellular response to stress;GO:0009814//defense response, incompatible interaction;GO:0007243//intracellular protein kinase cascade	hypothetical protein ARALYDRAFT_325615 [Arabidopsis lyrata subsp. lyrata]	ath:AT5G10770
CL8182.Contig1_NAU-YH	955	104	311	654	33.6608	95.003	184.091	1.4969	2.45127	0.95437	Up	Up	Up	4.18e-21	1.81e-80	2.19e-21	K10082|1|4e-09|60.5|mtr:MTR_5g031140|lectin, mannose-binding 2	GO:0005618//cell wall;GO:0009536//plastid;GO:0005576//extracellular region	GO:0005488//binding;GO:0016301//kinase activity	GO:0010243//response to organic nitrogen;GO:0009628//response to abiotic stimulus;GO:0050832//defense response to fungus	legume lectin family protein [Arabidopsis lyrata subsp. lyrata]	ath:AT1G53070
Unigene29296_NAU-YH	416	31	92	513	23.0337	64.5171	105.33	1.48594	2.1931	0.70716	Up	Up	Up	1.49e-06	8.88e-18	0.00114335	K12860|1|2e-49|191|aly:ARALYDRAFT_471078|pre-mRNA-splicing factor CDC5/CEF1	GO:0009536//plastid	GO:0003676//nucleic acid binding;GO:0001071//nucleic acid binding transcription factor activity	GO:0007049//cell cycle;GO:0002218//activation of innate immune response;GO:0006351//transcription, DNA-dependent	cell division cycle 5-like protein [Arabidopsis thaliana]	ath:AT1G09770	CDC5
CL6039.Contig1_NAU-YH	2012	1084	3216	5528	166.531	466.303	738.579	1.48547	2.14896	0.663484	Up	Up	Up	1.37e-213	0	3.89e-96	K01580|1|0.0|915|ath:AT1G65960|glutamate decarboxylase [EC:4.1.1.15]	GO:0044444//cytoplasmic part	GO:0005515//protein binding;GO:0043168;GO:0016831//carboxy-lyase activity	GO:0009813//flavonoid biosynthetic process;GO:0030001//metal ion transport;GO:0015698//inorganic anion transport;GO:0006605//protein targeting;GO:0032412//regulation of ion transmembrane transporter activity;GO:0009064//glutamine family amino acid metabolic process;GO:0006970//response to osmotic stress;GO:0010038//response to metal ion;GO:0009746;GO:0048588//developmental cell growth;GO:0009626/…	glutamate decarboxylase 2 [Brassica juncea]	ath:AT1G65960	GAD2
CL12108.Contig1_NAU-YH	302	21	62	513	21.4935	59.8915	118.386	1.47845	2.46153	0.98308	Up	Up	Up	0.000136604	1.16e-16	5.82e-05	-	GO:0055028//cortical microtubule;GO:0016020//membrane	GO:0015631//tubulin binding	GO:0007127//meiosis I;GO:0003006//developmental process involved in reproduction;GO:0006310//DNA recombination;GO:0042546//cell wall biogenesis;GO:0006342//chromatin silencing;GO:0003002//regionalization;GO:0006468//protein phosphorylation;GO:0007015//actin filament organization;GO:0007059//chromosome segregation;GO:0043623//cellular protein complex assembly;GO:0034968//histone lysine methylation…	atmap70-1 [Arabidopsis lyrata subsp. lyrata]	ath:AT1G68060	MAP70-1
Unigene1079_NAU-YH	1544	122	357	945	24.4235	67.453	164.529	1.46561	2.752	1.28638	Up	Up	Up	1.95e-23	2.87e-132	1.16e-49	-	GO:0009536//plastid	GO:0016855//racemase and epimerase activity, acting on amino acids and derivatives	GO:0008152//metabolic process	aspartate-glutamate racemase-like protein [Arabidopsis thaliana]	ath:AT1G15410
Unigene1426_NAU-YH	921	83	238	762	27.8557	75.3872	222.409	1.43635	2.99717	1.56082	Up	Up	Up	2.58e-15	1.93e-116	1.51e-53	K01915|1|1e-154|543|ath:AT5G16570|glutamine synthetase [EC:6.3.1.2]	GO:0005840//ribosome;GO:0030312//external encapsulating structure;GO:0005911//cell-cell junction;GO:0016020//membrane	GO:0032550;GO:0046914//transition metal ion binding;GO:0016211	GO:0009746;GO:0006541//glutamine metabolic process;GO:0042126//nitrate metabolic process;GO:0034285;GO:0010260//organ senescence	glutamine synthetase cytosolic isozyme 1-4 [Arabidopsis thaliana]	ath:AT5G16570	GLN1;4
CL6686.Contig2_NAU-YH	2048	486	1377	2258	73.3502	196.148	296.382	1.41907	2.01458	0.595511	Up	Up	Up	1.98e-85	2.97e-218	1.75e-32	K00695|1|0.0|845|aly:ARALYDRAFT_910122|sucrose synthase [EC:2.4.1.13]	GO:0043231//intracellular membrane-bounded organelle;GO:0005911//cell-cell junction;GO:0044444//cytoplasmic part;GO:0016020//membrane	GO:0035251//UDP-glucosyltransferase activity	GO:0005984//disaccharide metabolic process;GO:0010038//response to metal ion;GO:0009746;GO:0009627//systemic acquired resistance;GO:0034285;GO:0042743//hydrogen peroxide metabolic process;GO:0009247//glycolipid biosynthetic process	Sucrose synthase 1 [Arabidopsis thaliana]	ath:AT5G20830	SUS1
gi|167478453|gb|FD963858.1|FD963858	523	5	14	200	2.95504	7.8092	102.798	1.402	5.12049	3.7185	Up	Up	Up	0.155755	2.36e-45	2.4e-38	K08288|1|1e-17|87.4|aly:ARALYDRAFT_918782|protein kinase C substrate 80K-H	GO:0043231//intracellular membrane-bounded organelle	GO:0016772//transferase activity, transferring phosphorus-containing groups;GO:0005515//protein binding	GO:0016192//vesicle-mediated transport;GO:0006952//defense response;GO:0000097//sulfur amino acid biosynthetic process;GO:0030243//cellulose metabolic process;GO:0008380//RNA splicing;GO:0006796//phosphate-containing compound metabolic process;GO:0006487//protein N-linked glycosylation	calmodulin-binding protein [Arabidopsis lyrata subsp. lyrata]	ath:AT5G56360	PSL4
CL6377.Contig2_NAU-YH	2715	471	1317	2898	53.6224	141.513	286.936	1.40003	2.41982	1.0198	Up	Up	Up	4.59e-80	0	4.54e-105	-	GO:0071944//cell periphery;GO:0016020//membrane	GO:0003779//actin binding	GO:0009908//flower development;GO:0048519//negative regulation of biological process;GO:0009886//post-embryonic morphogenesis;GO:0030833//regulation of actin filament polymerization;GO:0009933//meristem structural organization;GO:0009943//adaxial/abaxial axis specification;GO:0009887//organ morphogenesis;GO:0043170;GO:0016049//cell growth;GO:0009799//specification of symmetry	formin-like protein 10 [Arabidopsis thaliana]	ath:AT3G07540
CL12940.Contig1_NAU-YH	2436	260	704	1614	32.9907	84.3094	178.108	1.35364	2.43262	1.07899	Up	Up	Up	9.31e-41	7.06e-197	3.63e-64	K16055|1|0.0|1393|ath:AT4G17770|trehalose 6-phosphate synthase/phosphatase [EC:2.4.1.15 3.1.3.12]	-	GO:0035251//UDP-glucosyltransferase activity;GO:0019203//carbohydrate phosphatase activity	GO:0005991//trehalose metabolic process;GO:0005982//starch metabolic process;GO:0044093	trehalose-6-phosphate synthase, putative [Brassica oleracea]	ath:AT4G17770	TPS5
CL2644.Contig1_NAU-YH	1040	102	275	1438	30.3153	77.14	371.692	1.34743	3.61599	2.26855	Up	Up	Up	4.77e-16	5.85e-261	2.72e-167	K08912|1|4e-150|528|ath:AT2G34430|light-harvesting complex II chlorophyll a/b binding protein 1	GO:0043234//protein complex;GO:0009526//plastid envelope;GO:0009534//chloroplast thylakoid;GO:0009570//chloroplast stroma;GO:0034357;GO:0005576//extracellular region	GO:0043169//cation binding;GO:0046906//tetrapyrrole binding	GO:0009746;GO:0009765//photosynthesis, light harvesting;GO:0009639//response to red or far red light	RecName: Full=Chlorophyll a-b binding protein 1, chloroplastic; LHCII	ath:AT2G34430	LHB1B1
CL94.Contig1_NAU-YH	1577	482	1277	2301	94.4735	236.233	392.231	1.32223	2.05372	0.731497	Up	Up	Up	3.7e-71	5.05e-228	1.59e-47	K10999|1|0.0|1061|ath:AT4G32410|cellulose synthase A [EC:2.4.1.12]	GO:0043231//intracellular membrane-bounded organelle;GO:0031224//intrinsic to membrane	GO:0046914//transition metal ion binding;GO:0016759//cellulose synthase activity	GO:0032989;GO:0030243//cellulose metabolic process;GO:0006007//glucose catabolic process;GO:0006972//hyperosmotic response;GO:0006996//organelle organization;GO:0016192//vesicle-mediated transport;GO:0010038//response to metal ion;GO:0070838//divalent metal ion transport;GO:0009746;GO:0048588//developmental cell growth;GO:0009832//plant-type cell wall biogenesis;GO:0042044//fluid transport;GO:007…	cellulose synthase 1.1 catalytic subunit [Brassica napus]	ath:AT4G32410	CESA1
Unigene30412_NAU-YH	2772	476	1254	2307	53.0773	131.973	223.723	1.31408	2.07555	0.761475	Up	Up	Up	3.19e-69	9.73e-232	4.44e-51	-	-	-	-	subtilase family protein [Arabidopsis thaliana]	ath:AT5G45650
Unigene17343_NAU-YH	414	21	55	513	15.6788	38.7563	127.266	1.30561	3.02096	1.71534	Up	Up	Up	0.00146046	3.08e-30	6.53e-16	K01681|1|1e-06|50.1|aly:ARALYDRAFT_480186|aconitate hydratase 1 [EC:4.2.1.3]	-	-	-	-	None
Unigene30258_NAU-YH	933	212	555	1190	70.2343	173.537	342.864	1.305	2.28739	0.982396	Up	Up	Up	1.83e-30	6.74e-135	1.32e-40	K03234|1|3e-175|612|aly:ARALYDRAFT_892631|elongation factor 2	GO:0031981//nuclear lumen;GO:0005911//cell-cell junction;GO:0009536//plastid;GO:0005576//extracellular region;GO:0031090//organelle membrane	GO:0046914//transition metal ion binding;GO:0032550;GO:0017111//nucleoside-triphosphatase activity;GO:0008135//translation factor activity, nucleic acid binding	GO:0006412//translation;GO:0009154//purine ribonucleotide catabolic process;GO:0006950//response to stress	elongation factor EF-2-like protein LOS1 [Arabidopsis thaliana]	ath:AT1G56070	LOS1
Unigene23754_NAU-YH	1871	177	456	1118	29.2411	71.1003	160.629	1.28186	2.45766	1.17581	Up	Up	Up	2.07e-24	5.56e-138	5.06e-51	K00281|1|0.0|936|aly:ARALYDRAFT_491390|glycine dehydrogenase [EC:1.4.4.2]	GO:0031976;GO:0005576//extracellular region;GO:0009532//plastid stroma;GO:0043234//protein complex;GO:0009526//plastid envelope	GO:0032550;GO:0016642;GO:0043168;GO:0016628//oxidoreductase activity, acting on the CH-CH group of donors, NAD or NADP as acceptor	GO:0006351//transcription, DNA-dependent;GO:0044257//cellular protein catabolic process;GO:0006732//coenzyme metabolic process;GO:0006779//porphyrin-containing compound biosynthetic process;GO:0006007//glucose catabolic process;GO:0006090//pyruvate metabolic process;GO:0005984//disaccharide metabolic process;GO:0006546//glycine catabolic process;GO:0006753//nucleoside phosphate metabolic process;…	hypothetical protein ARALYDRAFT_491390 [Arabidopsis lyrata subsp. lyrata]	ath:AT4G33010	GLDP1
CL3987.Contig3_NAU-YH	1366	2	5	513	0.452558	1.06782	100.954	1.2385	7.80138	6.56288	Up	Up	Up	0.542868	2.77e-133	1.02e-133	K15360|1|3e-17|88.2|vvi:100253596|centromere protein X;K03655|2|4e-11|67.8|gmx:100806552|ATP-dependent DNA helicase RecG [EC:3.6.4.12]	-	-	-	F5M15.26 [Arabidopsis thaliana]	ath:ArthMp075
gi|156168888|gb|EW729034.1|EW729034	857	47	112	354	16.9516	38.1257	111.04	1.16934	2.71158	1.54224	Up	Up	Up	1.24e-05	8.97e-49	1.56e-24	-	-	-	-	hypothetical protein ARALYDRAFT_485571 [Arabidopsis lyrata subsp. lyrata]	ath:AT3G52110
CL11889.Contig2_NAU-YH	2053	239	563	1321	35.9835	80.0018	172.97	1.1527	2.26511	1.11242	Up	Up	Up	1.73e-25	5.6e-148	3.56e-55	K12823|1|3e-62|238|zma:100381784|ATP-dependent RNA helicase DDX5/DBP2 [EC:3.6.4.13]	GO:0031981//nuclear lumen	GO:0032550;GO:0003676//nucleic acid binding;GO:0042623//ATPase activity, coupled;GO:0019899//enzyme binding	GO:0009451//RNA modification;GO:0010467//gene expression	hypothetical protein ARALYDRAFT_496396 [Arabidopsis lyrata subsp. lyrata]	ath:AT5G62190	PRH75
gi|158916024|gb|EX889032.1|EX889032	815	35	82	344	13.2741	29.3519	113.464	1.14484	3.09555	1.95071	Up	Up	Up	0.000346503	3.07e-54	5.47e-33	K03283|1|6e-122|434|aly:ARALYDRAFT_487029|heat shock 70kDa protein 1/8	GO:0005911//cell-cell junction;GO:0009536//plastid;GO:0034399//nuclear periphery;GO:0005840//ribosome;GO:0005576//extracellular region;GO:0031090//organelle membrane;GO:0030312//external encapsulating structure	GO:0032550;GO:0004672//protein kinase activity;GO:0019899//enzyme binding;GO:0016628//oxidoreductase activity, acting on the CH-CH group of donors, NAD or NADP as acceptor	GO:0009642//response to light intensity;GO:0051707//response to other organism;GO:0006007//glucose catabolic process;GO:0010118//stomatal movement;GO:0000302//response to reactive oxygen species;GO:0006970//response to osmotic stress;GO:0044710;GO:0010038//response to metal ion;GO:0009845//seed germination;GO:0006464//cellular protein modification process;GO:0006952//defense response	heat shock 70kDa protein 18 [Arabidopsis thaliana]	ath:AT5G02490
CL7140.Contig1_NAU-YH	2831	507	1172	2473	55.3558	120.773	234.823	1.12549	2.08477	0.959284	Up	Up	Up	9.59e-51	7.85e-250	4.85e-81	K13525|1|0.0|1488|ath:AT3G09840|transitional endoplasmic reticulum ATPase	GO:0031981//nuclear lumen;GO:0005911//cell-cell junction;GO:0016020//membrane;GO:0005840//ribosome;GO:0015630//microtubule cytoskeleton;GO:0005576//extracellular region;GO:0030312//external encapsulating structure;GO:0012505//endomembrane system	GO:0032550;GO:0005515//protein binding;GO:0042623//ATPase activity, coupled	GO:0009856//pollination;GO:0006796//phosphate-containing compound metabolic process;GO:0000904//cell morphogenesis involved in differentiation;GO:0010038//response to metal ion;GO:0006464//cellular protein modification process;GO:0006952//defense response	cell division control protein 48-A [Arabidopsis thaliana]	ath:AT3G09840	CDC48
CL1899.Contig2_NAU-YH	1825	77	172	697	13.0414	27.4945	102.666	1.07605	2.97679	1.90074	Up	Up	Up	2.32e-07	8.83e-106	1.55e-64	-	GO:0031225//anchored to membrane;GO:0005576//extracellular region;GO:0009536//plastid	GO:0046914//transition metal ion binding	GO:0019758	hypothetical protein ARALYDRAFT_913787 [Arabidopsis lyrata subsp. lyrata]	ath:AT4G27520	ENODL2
Unigene20772_NAU-YH	991	227	490	1695	70.8022	144.246	459.783	1.02666	2.69909	1.67243	Up	Up	Up	1.65e-18	1.93e-232	1.29e-131	-	-	-	-	RNA-dependent RNA polymerase [Pyrus pyrifolia]	None
CL3416.Contig1_NAU-YH	1041	104	223	729	30.88	62.4935	188.25	1.01703	2.6079	1.59087	Up	Up	Up	1.35e-08	3.18e-96	1.16e-52	K01955|1|9e-34|142|vvi:100262205|carbamoyl-phosphate synthase large subunit [EC:6.3.5.5];K13944|2|6e-30|129|ath:AT2G42430|LOB domain-containing protein 16	-	-	GO:0010160//formation of organ boundary	LOB domain-containing protein 25 [Arabidopsis lyrata subsp. lyrata]	ath:AT3G27650	LBD25
gi|166126308|gb|FD556043.1|FD556043	735	103	217	942	43.3156	86.1297	344.525	0.991623	2.99165	2.00003	Up	Up	Up	4.62e-08	1.05e-143	2.52e-93	K03283|1|7e-116|408|aly:ARALYDRAFT_487029|heat shock 70kDa protein 1/8	GO:0031981//nuclear lumen;GO:0005911//cell-cell junction;GO:0009536//plastid;GO:0005840//ribosome;GO:0005576//extracellular region;GO:0031090//organelle membrane;GO:0030312//external encapsulating structure	GO:0032550;GO:0019899//enzyme binding;GO:0016628//oxidoreductase activity, acting on the CH-CH group of donors, NAD or NADP as acceptor	GO:0051707//response to other organism;GO:0006007//glucose catabolic process;GO:0010118//stomatal movement;GO:0044267//cellular protein metabolic process;GO:0006970//response to osmotic stress;GO:0044710;GO:0010038//response to metal ion;GO:0009845//seed germination;GO:0006952//defense response	HSC70-1 [Arabidopsis lyrata subsp. lyrata]	ath:AT3G12580	HSP70
Unigene24086_NAU-YH	567	57	120	634	31.0732	61.7417	300.582	0.990572	3.27402	2.28344	Up	Up	Up	9.61e-05	2.13e-105	3.04e-74	K03283|1|5e-99|357|gmx:100787543|heat shock 70kDa protein 1/8	GO:0031981//nuclear lumen;GO:0005911//cell-cell junction;GO:0005840//ribosome;GO:0005576//extracellular region;GO:0031090//organelle membrane;GO:0030312//external encapsulating structure;GO:0009526//plastid envelope	GO:0032550;GO:0019899//enzyme binding;GO:0016628//oxidoreductase activity, acting on the CH-CH group of donors, NAD or NADP as acceptor	GO:0051707//response to other organism;GO:0006007//glucose catabolic process;GO:0010118//stomatal movement;GO:0044267//cellular protein metabolic process;GO:0006970//response to osmotic stress;GO:0044710;GO:0010038//response to metal ion;GO:0009845//seed germination;GO:0006952//defense response	heat shock cognate protein 70 [Eutrema halophilum]	ath:AT5G02500	HSC70-1
CL1737.Contig2_NAU-YH	4418	643	1341	513	44.9863	88.549	101.065	0.97699	1.16773	0.190737	Up	Up	Up	4.16e-46	1.19e-72	0.00234783	K12616|1|0.0|1786|ath:AT3G13300|enhancer of mRNA-decapping protein 4	GO:0043231//intracellular membrane-bounded organelle;GO:0035770//ribonucleoprotein granule;GO:0044444//cytoplasmic part	GO:0042802//identical protein binding	GO:0031086//nuclear-transcribed mRNA catabolic process, deadenylation-independent decay;GO:0009887//organ morphogenesis;GO:0009733//response to auxin stimulus;GO:0003006//developmental process involved in reproduction	enhancer of mRNA-decapping protein 4 [Arabidopsis thaliana]	ath:AT3G13300	VCS
gi|167486358|gb|FD970593.1|FD970593	778	89	185	488	35.3594	69.3701	168.615	0.97222	2.25357	1.28135	Up	Up	Up	9.19e-07	2.32e-54	1.4e-25	K14963|1|6e-07|52.8|bdi:100832822|COMPASS component SWD3;K14855|3|4e-06|50.1|ppp:PHYPADRAFT_160972|ribosome assembly protein 4;K12662|5|5e-06|49.7|ota:Ot14g00400|U4/U6 small nuclear ribonucleoprotein PRP4	GO:0031234//extrinsic to internal side of plasma membrane;GO:0031461//cullin-RING ubiquitin ligase complex	-	GO:0006402//mRNA catabolic process	WD-40 repeat family protein [Arabidopsis lyrata subsp. lyrata]	ath:AT1G55680
CL13624.Contig1_NAU-YH	1072	15	31	730	4.32505	8.43621	183.057	0.963878	5.40343	4.43955	Up	Up	Up	0.0987968	1.15e-170	8.61e-160	K00975|1|0.0|667|ath:AT4G39210|glucose-1-phosphate adenylyltransferase [EC:2.7.7.27]	GO:0043234//protein complex;GO:0009536//plastid	GO:0070566//adenylyltransferase activity	GO:0005982//starch metabolic process;GO:0043094;GO:0005977//glycogen metabolic process	glucose-1-phosphate adenylyltransferase large subunit 3 [Arabidopsis thaliana]	ath:AT4G39210	APL3
gi|158914031|gb|EX887801.1|EX887801	711	24	49	316	10.4337	20.1051	119.474	0.946319	3.51738	2.57107	Up	Up	Up	0.030061	6.47e-56	1.73e-42	K00975|1|9e-111|376|aly:ARALYDRAFT_490693|glucose-1-phosphate adenylyltransferase [EC:2.7.7.27]	GO:0043234//protein complex;GO:0009536//plastid	GO:0070566//adenylyltransferase activity	GO:0005982//starch metabolic process;GO:0043094;GO:0005977//glycogen metabolic process	hypothetical protein ARALYDRAFT_490693 [Arabidopsis lyrata subsp. lyrata]	ath:AT4G39210	APL3
gi|161553142|gb|EY924995.1|EY924995	604	17	34	234	8.69975	16.4219	104.144	0.916572	3.58147	2.6649	Up	Up	Up	0.0962575	5.02e-42	9.77e-33	-	-	-	-	-	None
Unigene23690_NAU-YH	414	28	54	513	20.9051	38.0517	107.137	0.864104	2.35753	1.49343	Up	Up	Up	0.036067	1.38e-19	4.27e-11	-	-	-	-	-	None
Unigene30281_NAU-YH	944	65	122	353	21.2832	37.7023	100.522	0.824941	2.23972	1.41478	Up	Up	Up	0.00100082	4.51e-39	1.46e-21	K08064|1|8e-34|142|sbi:SORBI_01g045500|nuclear transcription factor Y, alpha	GO:0005667//transcription factor complex	GO:0003676//nucleic acid binding;GO:0001071//nucleic acid binding transcription factor activity	GO:0006351//transcription, DNA-dependent	nuclear transcription factor Y subunit A-3 [Arabidopsis thaliana]	ath:AT1G72830	NF-YA3
CL4666.Contig3_NAU-YH	1127	61	114	502	16.7302	29.5095	119.739	0.818725	2.83937	2.02065	Up	Up	Up	0.00171139	1.35e-72	2.23e-50	-	-	-	-	hypothetical protein [Arabidopsis thaliana]	ath:AT2G40480
CL3921.Contig2_NAU-YH	1430	375	695	1865	81.0569	141.785	350.59	0.806694	2.11278	1.30608	Up	Up	Up	1.53e-17	1.32e-191	2.54e-100	-	GO:0043231//intracellular membrane-bounded organelle;GO:0005911//cell-cell junction;GO:0044444//cytoplasmic part;GO:0016020//membrane	-	GO:0006007//glucose catabolic process;GO:0016192//vesicle-mediated transport;GO:0000097//sulfur amino acid biosynthetic process;GO:0010038//response to metal ion;GO:0009414//response to water deprivation;GO:0040007//growth;GO:0032989;GO:0006970//response to osmotic stress;GO:0003006//developmental process involved in reproduction	Late embryogenesis abundant protein, group 2 [Arabidopsis thaliana]	ath:AT2G44060
gi|161544132|gb|EY915849.1|EY915849	289	56	100	327	59.8942	100.944	304.163	0.753073	2.34436	1.59128	Up	Up	Up	0.00778866	3e-38	1.02e-23	K02991|1|3e-33|137|osa:4333016|small subunit ribosomal protein S6e	-	-	-	117M18_18 [Brassica rapa]	ath:AT5G10360	EMB3010
CL9167.Contig1_NAU-YH	3640	947	1649	8553	80.4162	132.16	631.647	0.716727	2.97356	2.25683	Up	Up	Up	1.62e-33	0	0	-	GO:0043231//intracellular membrane-bounded organelle	GO:0036094//small molecule binding;GO:0034062//RNA polymerase activity;GO:0097159//organic cyclic compound binding	GO:0006351//transcription, DNA-dependent;GO:0007243//intracellular protein kinase cascade;GO:0009755//hormone-mediated signaling pathway;GO:0042743//hydrogen peroxide metabolic process;GO:0006605//protein targeting;GO:0006633//fatty acid biosynthetic process;GO:0016441//posttranscriptional gene silencing;GO:0014070//response to organic cyclic compound;GO:0009626//plant-type hypersensitive respons…	RNA-dependent RNA polymerase 1 [Arabidopsis thaliana]	ath:AT1G14790	RDR1
Unigene29459_NAU-YH	695	25	43	285	11.1186	18.0495	110.234	0.69898	3.30953	2.61055	Up	Up	Up	0.151989	8.17e-48	5.63e-39	-	-	-	-	-	None
Unigene21633_NAU-YH	1433	400	679	3777	86.2797	138.231	708.53	0.679983	3.03773	2.35775	Up	Up	Up	7.05e-13	0	0	K03146|1|4e-169|592|aly:ARALYDRAFT_918614|thiamine biosynthetic enzyme	GO:0009532//plastid stroma;GO:0009526//plastid envelope	GO:0046914//transition metal ion binding;GO:0042802//identical protein binding	GO:0006772//thiamine metabolic process;GO:0015992//proton transport;GO:0018130;GO:0005984//disaccharide metabolic process;GO:0005982//starch metabolic process;GO:0006468//protein phosphorylation;GO:0044093;GO:0009416//response to light stimulus;GO:0033554//cellular response to stress;GO:0006952//defense response	hypothetical protein ARALYDRAFT_918614 [Arabidopsis lyrata subsp. lyrata]	ath:AT5G54770	THI1
gi|158921790|gb|EX894708.1|EX894708	615	47	78	265	23.622	36.9998	115.832	0.647385	2.29383	1.64644	Up	Up	Up	0.0529367	2.93e-30	3.21e-20	K03283|1|1e-91|333|aly:ARALYDRAFT_487029|heat shock 70kDa protein 1/8	GO:0031981//nuclear lumen;GO:0005911//cell-cell junction;GO:0009536//plastid;GO:0005840//ribosome;GO:0005576//extracellular region;GO:0031090//organelle membrane;GO:0030312//external encapsulating structure	GO:0032550;GO:0019899//enzyme binding	GO:0051707//response to other organism;GO:0006007//glucose catabolic process;GO:0010118//stomatal movement;GO:0044267//cellular protein metabolic process;GO:0006970//response to osmotic stress;GO:0010038//response to metal ion;GO:0009845//seed germination;GO:0006952//defense response	HSC70-1 [Arabidopsis lyrata subsp. lyrata]	ath:AT3G12580	HSP70
gi|332780641|gb|FY443224.1|FY443224	837	85	141	916	31.3898	49.1444	294.19	0.646732	3.22838	2.58165	Up	Up	Up	0.00527397	2.21e-150	5.91e-124	-	-	-	-	ST225 [Eutrema halophilum]	ath:AT1G19530
CL5541.Contig1_NAU-YH	2661	212	347	1191	24.6255	38.0422	120.316	0.627443	2.2886	1.66116	Up	Up	Up	4.74e-06	4.27e-135	1.48e-91	K10661|1|0.0|1400|aly:ARALYDRAFT_328336|E3 ubiquitin-protein ligase MARCH6 [EC:6.3.2.19]	-	GO:0003824//catalytic activity;GO:0046914//transition metal ion binding	-	protein binding protein [Arabidopsis lyrata subsp. lyrata]	ath:AT4G34100
gi|158637333|gb|EX747224.1|EX747224	647	129	209	1205	61.6283	94.2372	500.657	0.612704	3.02216	2.40945	Up	Up	Up	0.00086228	9.46e-186	1.17e-150	-	-	-	-	-	None
Unigene5866_NAU-YH	2086	243	379	1295	36.007	53.0036	166.883	0.557813	2.21249	1.65468	Up	Up	Up	1.97e-05	6.22e-141	5.35e-99	K06694|1|2e-17|89.4|cre:CHLREDRAFT_140415|26S proteasome non-ATPase regulatory subunit 10	GO:0043231//intracellular membrane-bounded organelle	-	-	ankyrin like protein [Arabidopsis thaliana]	ath:AT5G02620	ANK1
gi|161538819|gb|EY911100.1|EY911100	762	203	299	1598	82.3447	114.471	563.74	0.475238	2.77528	2.30004	Up	Up	Up	0.00169394	8.78e-226	4.4e-189	-	-	-	-	-	None
Unigene22463_NAU-YH	1197	142	203	988	36.6682	49.4746	221.881	0.432161	2.59719	2.16503	Up	Up	Up	0.0254688	7.85e-130	2.19e-108	K00852|1|1e-142|504|aly:ARALYDRAFT_312683|ribokinase [EC:2.7.1.15]	GO:0009532//plastid stroma	GO:0016773//phosphotransferase activity, alcohol group as acceptor	GO:0019321//pentose metabolic process;GO:0006796//phosphate-containing compound metabolic process	ribokinase [Arabidopsis thaliana]	ath:AT1G17160
CL630.Contig1_NAU-YH	1690	14	20	676	2.56057	3.45242	107.527	0.431145	5.39209	4.96095	Up	Up	Up	0.62735	7.47e-158	8.85e-158	K00799|1|3e-36|135|gmx:547936|glutathione S-transferase [EC:2.5.1.18]	GO:0044424//intracellular part	GO:0016846//carbon-sulfur lyase activity;GO:0072341//modified amino acid binding	GO:0006511//ubiquitin-dependent protein catabolic process;GO:0043248//proteasome assembly;GO:0009062//fatty acid catabolic process;GO:0014070//response to organic cyclic compound;GO:0009404//toxin metabolic process;GO:0035966//response to topologically incorrect protein	glutathione S-transferase TAU 24 [Arabidopsis thaliana]	ath:AT1G17170	GSTU24
Unigene26354_NAU-YH	880	57	81	334	20.0211	26.8524	102.028	0.423532	2.34938	1.92585	Up	Up	Up	0.224662	3.69e-39	1.69e-31	K11971|1|4e-64|243|ath:AT1G32340|E3 ubiquitin-protein ligase RNF14 [EC:6.3.2.19]	-	-	GO:0006498//N-terminal protein lipidation;GO:0009608//response to symbiont;GO:0006486//protein glycosylation	ubiquitin-protein ligase RNF14 [Arabidopsis thaliana]	ath:AT1G32340	NHL8
Unigene20992_NAU-YH	1351	105	137	1274	24.0231	29.5832	253.496	0.300358	3.39947	3.09911	Up	Up	Up	0.262747	2.87e-219	5.05e-209	K01369|1|0.0|634|aly:ARALYDRAFT_491400|legumain [EC:3.4.22.34]	GO:0005773//vacuole	GO:0004175//endopeptidase activity	GO:0016044//cellular membrane organization;GO:0016485//protein processing;GO:0016192//vesicle-mediated transport	vacuolar-processing enzyme gamma [Arabidopsis thaliana]	ath:AT4G32940	GAMMA-VPE
Unigene29032_NAU-YH	994	50	63	508	15.5481	18.4899	137.383	0.249996	3.14339	2.8934	Up	Up	Up	0.579821	2.77e-81	1.23e-77	K01535|1|6e-172|601|aly:ARALYDRAFT_480836|H+-transporting ATPase [EC:3.6.3.6]	GO:0005911//cell-cell junction;GO:0043231//intracellular membrane-bounded organelle;GO:0031224//intrinsic to membrane;GO:0031090//organelle membrane;GO:0044444//cytoplasmic part	GO:0032550;GO:0019829//cation-transporting ATPase activity;GO:0046872//metal ion binding	GO:0006865//amino acid transport;GO:0015988//energy coupled proton transmembrane transport, against electrochemical gradient;GO:0009664//plant-type cell wall organization;GO:0009152//purine ribonucleotide biosynthetic process;GO:0016482//cytoplasmic transport;GO:0015698//inorganic anion transport;GO:0010118//stomatal movement;GO:0019758;GO:0006464//cellular protein modification process;GO:0010035…	H(+)-ATPase 1 [Arabidopsis thaliana]	ath:AT2G18960	HA1
Unigene18380_NAU-YH	400	13	15	513	10.0457	10.9399	113.575	0.123023	3.49901	3.37598	Up	Up	Up	0.899555	8.37e-30	7.17e-30	K00517|1|1e-14|76.6|osa:4348172|[EC:1.14.-.-];K13029|5|1e-10|62.8|sbi:SORBI_01g001180|4-hydroxyphenylacetaldehyde oxime monooxygenase [EC:1.14.13.68]	GO:0043231//intracellular membrane-bounded organelle	GO:0046906//tetrapyrrole binding;GO:0046914//transition metal ion binding;GO:0016491//oxidoreductase activity	GO:0009683;GO:0009414//response to water deprivation;GO:0009267//cellular response to starvation;GO:0006568//tryptophan metabolic process;GO:0009247//glycolipid biosynthetic process	predicted protein [Arabidopsis lyrata subsp. lyrata]	ath:AT2G45560	CYP76C1
Unigene21706_NAU-YH	382	7	8	16576	5.66408	6.10952	11664.7	0.109217	11.008	10.8988	Up	Up	Up	0.956726	0	0	-	-	-	-	hypothetical protein [Plantago major]	None
CL3211.Contig2_NAU-YH	3886	452	509	2081	35.9526	38.2116	143.955	0.0879148	2.00145	1.91353	Up	Up	Up	0.558106	2.01e-199	1.12e-194	K15535|1|0.0|1952|aly:ARALYDRAFT_489476|phosphoglucan, water dikinase [EC:2.7.9.5]	GO:0009536//plastid	GO:0032550;GO:0030247//polysaccharide binding;GO:0016301//kinase activity	GO:0005975//carbohydrate metabolic process;GO:0016310//phosphorylation	hypothetical protein ARALYDRAFT_489476 [Arabidopsis lyrata subsp. lyrata]	ath:AT5G26570	ATGWD3
Unigene29298_NAU-YH	873	14	15	955	4.95688	5.01254	294.067	0.0161076	5.89057	5.87446	Up	Up	Up	0.983912	2.16e-231	8.62e-241	-	-	-	-	-	None
Unigene24063_NAU-YH	303	0	547	2	0.01	526.654	1.77437	15.6846	7.47116	-8.2134	Up	Up	Down	4.24e-156	0.497892	5.23e-168	-	-	-	-	-	None
gi|161574921|gb|EY946279.1|EY946279	704	0	808	30	0.01	334.826	11.4553	15.0311	10.1618	-4.86933	Up	Up	Down	3.32e-231	8.91e-08	3.26e-209	K01184|1|9e-23|105|rcu:RCOM_1063390|polygalacturonase [EC:3.2.1.15]	-	GO:0004553//hydrolase activity, hydrolyzing O-glycosyl compounds	GO:0009451//RNA modification	F20B24.8 [Arabidopsis thaliana]	ath:AT1G10640
CL11110.Contig1_NAU-YH	468	0	465	180	0.01	289.86	103.391	14.8231	13.3358	-1.48724	Up	Up	Down	1.62e-132	1.03e-47	1.53e-33	-	-	-	-	BN28a [Brassica napus]	None
CL4026.Contig3_NAU-YH	359	0	330	1	0.01	268.164	0.748795	14.7108	6.2265	-8.48433	Up	Up	Down	1.02e-93	0.718651	2.34e-101	-	-	-	-	hypothetical protein ARALYDRAFT_493374 [Arabidopsis lyrata subsp. lyrata]	None
Unigene20229_NAU-YH	319	0	273	22	0.01	249.662	18.5391	14.6077	10.8564	-3.75133	Up	Up	Down	2.38e-77	9.88e-06	6.51e-59	-	GO:0005576//extracellular region;GO:0044424//intracellular part	GO:0046914//transition metal ion binding;GO:0016623;GO:0048037//cofactor binding	GO:0009226//nucleotide-sugar biosynthetic process;GO:0015833//peptide transport	RecName: Full=Germin-like protein subfamily 1 member 13; Flags: Precursor	ath:AT5G39110
Unigene9362_NAU-YH	801	0	612	7	0.01	222.895	2.34921	14.4441	7.87603	-6.56804	Up	Up	Down	8.28e-175	0.0453354	1.8e-179	-	-	GO:0005488//binding	GO:0044238//primary metabolic process;GO:0009626//plant-type hypersensitive response;GO:0009813//flavonoid biosynthetic process;GO:0006605//protein targeting;GO:0010876//lipid localization	bifunctional inhibitor/lipid-transfer protein/seed storage 2S albumin-like protein [Arabidopsis thaliana]	ath:AT1G73780
Unigene18201_NAU-YH	562	0	261	11	0.01	135.483	5.26155	13.7258	9.03934	-4.68648	Up	Up	Down	6.55e-74	0.00523408	8.62e-66	-	-	-	-	PREDICTED: uncharacterized protein LOC100853134 [Vitis vinifera]	None
gi|161559494|gb|EY931303.1|EY931303	566	0	222	162	0.01	114.424	76.9406	13.4821	12.9095	-0.572572	Up	Up	Down	9.86e-63	7.27e-43	0.000957201	-	-	-	-	BN28a [Brassica napus]	ath:AT5G15970	KIN2
Unigene30480_NAU-YH	1348	0	521	322	0.01	112.753	64.213	13.4609	12.6487	-0.812229	Up	Up	Down	1.3e-148	4.75e-86	2.49e-14	-	-	-	-	-	None
Unigene15964_NAU-YH	362	0	135	513	0.01	108.794	3.71295	13.4093	8.53642	-4.87289	Up	Up	Down	7.55e-38	0.123908	1.19e-34	-	-	-	-	hypothetical protein 24.t00017 [Brassica oleracea]	None
gi|161545919|gb|EY917829.1|EY917829	265	0	94	513	0.01	103.481	47.677	13.3371	12.2191	-1.11801	Up	Up	Down	3.52e-26	3.33e-12	8.87e-05	-	-	-	-	-	None
CL8759.Contig1_NAU-YH	995	1	743	25	0.31065	217.844	6.7542	9.45379	4.44242	-5.01137	Up	Up	Down	5.92e-210	1.88e-05	2.25e-195	K12843|1|1e-41|168|vvi:100248403|U4/U6 small nuclear ribonucleoprotein PRP3;K05681|2|3e-28|124|cme:CMS467C|ATP-binding cassette, subfamily G (WHITE), member 2;K05643|4|3e-19|94.4|ppp:PHYPADRAFT_221752|ATP-binding cassette, subfamily A (ABC1), member 3	-	GO:0017111//nucleoside-triphosphatase activity;GO:0032550	GO:0009154//purine ribonucleotide catabolic process	abc transporter family protein [Arabidopsis lyrata subsp. lyrata]	ath:AT5G52860
gi|332769684|gb|FY429023.1|FY429023	423	3	1551	712	2.19218	1069.68	452.477	8.93059	7.68934	-1.24126	Up	Up	Down	0	7.13e-185	1.27e-84	-	-	-	-	cell wall-plasma membrane linker protein [Brassica napus]	ath:AT3G22120	CWLP
Unigene79_NAU-YH	870	6	2231	215	2.1317	748.102	66.4319	8.45508	4.9618	-3.49329	Up	Up	Down	0	5.18e-48	0	-	GO:0000502//proteasome complex	GO:0005488//binding;GO:0004175//endopeptidase activity	GO:0052386//cell wall thickening;GO:0016044//cellular membrane organization;GO:0006508//proteolysis;GO:0009555//pollen development;GO:0010876//lipid localization	hypothetical protein ARALYDRAFT_493374 [Arabidopsis lyrata subsp. lyrata]	ath:AT4G15160
gi|167441807|gb|FD949069.1|FD949069	603	3	1097	4	1.5378	530.725	1.7832	8.43096	0.213604	-8.21735	Up	Up	Down	0	0.923721	0	-	-	-	-	-	None
gi|167449717|gb|FD955072.1|FD955072	791	11	3299	2163	4.29844	1216.71	735.084	8.14495	7.41795	-0.727001	Up	Up	Down	0	0	1.26e-73	-	-	-	-	cell wall-plasma membrane linker protein [Brassica napus]	ath:AT3G22120	CWLP
gi|161568499|gb|EY939462.1|EY939462	784	1	280	51	0.394256	104.189	17.4868	8.04585	5.47099	-2.57486	Up	Up	Down	3.1e-77	6.69e-12	7.87e-42	-	GO:0009534//chloroplast thylakoid	GO:0036094//small molecule binding;GO:0097159//organic cyclic compound binding	GO:0019684//photosynthesis, light reaction;GO:0043479;GO:0007275//multicellular organismal development;GO:0005976//polysaccharide metabolic process;GO:0045229//external encapsulating structure organization;GO:0006007//glucose catabolic process;GO:0006090//pyruvate metabolic process;GO:0032535//regulation of cellular component size;GO:0009826//unidimensional cell growth;GO:0048588//developmental c…	hypothetical protein ARALYDRAFT_488130 [Arabidopsis lyrata subsp. lyrata]	ath:AT5G13140
Unigene22073_NAU-YH	342	1	275	17	0.903792	234.578	13.3623	8.01986	3.88603	-4.13383	Up	Up	Down	8.25e-76	0.00135436	6.7e-64	-	-	-	-	bifunctional inhibitor/lipid-transfer protein/seed storage 2S albumin-like protein [Arabidopsis tha	ath:AT4G15160
gi|167444678|gb|FD951186.1|FD951186	703	3	755	396	1.31905	313.308	151.425	7.89194	6.84296	-1.04898	Up	Up	Down	4.61e-209	4.66e-100	1.69e-31	-	-	GO:0005488//binding	GO:0052386//cell wall thickening;GO:0016044//cellular membrane organization;GO:0009555//pollen development;GO:0010876//lipid localization	cell wall-plasma membrane linker protein [Brassica napus]	ath:AT3G22120	CWLP
CL1422.Contig3_NAU-YH	606	1	208	4	0.510061	100.132	1.77437	7.61701	1.79857	-5.81845	Up	Up	Down	9.93e-57	0.490378	3.81e-58	K09955|1|4e-93|338|aly:ARALYDRAFT_488069|hypothetical protein	GO:0005618//cell wall;GO:0043231//intracellular membrane-bounded organelle	GO:0003824//catalytic activity	GO:0008152//metabolic process	hypothetical protein ARALYDRAFT_488069 [Arabidopsis lyrata subsp. lyrata]	ath:AT5G12950
Unigene30403_NAU-YH	546	2	391	238	1.13222	208.913	117.177	7.5276	6.69338	-0.834213	Up	Up	Down	5.37e-107	1.4e-59	2.37e-11	-	GO:0005576//extracellular region	GO:0060089	GO:0048764;GO:0007154//cell communication	protein ralf-like 27 [Arabidopsis thaliana]	ath:AT3G29780	RALFL27
CL4801.Contig1_NAU-YH	592	2	378	28	1.04425	186.273	12.7143	7.47881	3.60592	-3.87289	Up	Up	Down	2.73e-103	2.35e-05	9.28e-84	-	GO:0005576//extracellular region;GO:0044424//intracellular part	GO:0046914//transition metal ion binding;GO:0016623;GO:0048037//cofactor binding	GO:0009226//nucleotide-sugar biosynthetic process;GO:0015833//peptide transport	germin-like protein subfamily 1 member 14 [Arabidopsis thaliana]	ath:AT5G39150
CL6152.Contig2_NAU-YH	1064	6	1095	22	1.74303	300.229	5.55825	7.42832	1.67304	-5.75529	Up	Up	Down	2.03e-300	0.0273801	0	-	-	GO:0046906//tetrapyrrole binding	GO:0009411//response to UV;GO:0009813//flavonoid biosynthetic process;GO:0015995//chlorophyll biosynthetic process;GO:0034285;GO:0009639//response to red or far red light;GO:0006950//response to stress	ELIP [Brassica rapa subsp. pekinensis]	ath:AT3G22840	ELIP1
CL2865.Contig2_NAU-YH	2016	24	3603	84	3.67973	521.38	11.2007	7.14659	1.60592	-5.54067	Up	Up	Down	0	1.99e-06	0	K01184|1|2e-153|541|rcu:RCOM_1063390|polygalacturonase [EC:3.2.1.15]	-	GO:0004553//hydrolase activity, hydrolyzing O-glycosyl compounds	GO:0009451//RNA modification	Pectin lyase-like protein [Arabidopsis thaliana]	ath:AT1G10640
CL2121.Contig4_NAU-YH	220	2	262	34	2.80997	347.423	41.5445	6.94999	3.88603	-3.06397	Up	Up	Down	2.66e-70	9.78e-07	4.13e-47	-	GO:0043231//intracellular membrane-bounded organelle	GO:0016787//hydrolase activity	-	hypothetical protein 24.t00017 [Brassica oleracea]	ath:AT2G13770
gi|332769832|gb|FY429924.1|FY429924	727	6	703	134	2.55101	282.099	49.5482	6.78899	4.27969	-2.5093	Up	Up	Down	1.15e-188	1.86e-27	4.95e-102	-	-	-	-	cell wall-plasma membrane linker protein homolog [Arabidopsis thaliana]	ath:AT3G22142
CL7645.Contig4_NAU-YH	1451	6	649	574	1.27814	130.484	106.341	6.67368	6.37851	-0.295174	Up	Up	Down	2.46e-173	1.5e-142	0.00263135	K00430|1|1e-153|541|aly:ARALYDRAFT_321537|peroxidase [EC:1.11.1.7]	GO:0005618//cell wall;GO:0043231//intracellular membrane-bounded organelle;GO:0044444//cytoplasmic part;GO:0031090//organelle membrane;GO:0005576//extracellular region	GO:0043169//cation binding;GO:0046906//tetrapyrrole binding;GO:0016209//antioxidant activity;GO:0003824//catalytic activity	GO:0009314//response to radiation;GO:0010038//response to metal ion;GO:0044710;GO:0052166;GO:0000902//cell morphogenesis;GO:0006970//response to osmotic stress;GO:0044237//cellular metabolic process	peroxidase precursor [Raphanus sativus var. niger]	ath:AT2G38390
Unigene2744_NAU-YH	250	1	106	513	1.23639	123.693	23.6559	6.64449	4.258	-2.38649	Up	Up	Down	6.8e-28	9.65e-05	1.26e-14	-	-	-	-	-	None
CL8963.Contig3_NAU-YH	1263	5	506	295	1.22366	116.877	62.7879	6.57764	5.68121	-0.896428	Up	Up	Down	1.93e-134	3.73e-70	2.08e-16	-	GO:0043231//intracellular membrane-bounded organelle	-	GO:0000902//cell morphogenesis;GO:0009639//response to red or far red light	hypothetical protein [Arabidopsis thaliana]	ath:AT3G04510	LSH2
CL2121.Contig1_NAU-YH	1222	15	1467	283	3.79415	350.219	62.2547	6.52833	4.03633	-2.492	Up	Up	Down	0	9.72e-56	1.76e-211	-	GO:0030529//ribonucleoprotein complex	GO:0016787//hydrolase activity	-	hypothetical protein [Arabidopsis thaliana]	ath:AT2G13770
gi|154092706|gb|EV525679.1|EV525679	830	5	437	24	1.86203	153.597	7.77303	6.36613	2.0616	-4.30453	Up	Up	Down	6.32e-115	0.00592934	1.27e-104	K01184|1|7e-108|388|rcu:RCOM_1063390|polygalacturonase [EC:3.2.1.15]	-	-	-	hypothetical protein ARALYDRAFT_471186 [Arabidopsis lyrata subsp. lyrata]	ath:AT1G10640
Unigene23713_NAU-YH	321	6	403	39	5.77751	366.252	32.66	5.98625	2.49901	-3.48724	Up	Up	Down	8.22e-104	2.5e-05	6.97e-82	-	-	-	-	ORF-c [Brassica rapa]	None
Unigene30418_NAU-YH	923	19	1229	508	6.36278	388.446	147.951	5.93191	4.53932	-1.39259	Up	Up	Down	0	2.81e-108	3.73e-80	-	-	-	-	-	None
CL7645.Contig2_NAU-YH	661	8	467	492	3.74096	206.108	200.088	5.78385	5.74108	-0.0427701	Up	Up	Down	7.45e-119	8.94e-118	0.772392	K00430|1|3e-95|345|ath:AT2G38380|peroxidase [EC:1.11.1.7]	GO:0005618//cell wall;GO:0043231//intracellular membrane-bounded organelle	GO:0046906//tetrapyrrole binding;GO:0016209//antioxidant activity;GO:0043169//cation binding;GO:0003824//catalytic activity	GO:0006970//response to osmotic stress;GO:0044710;GO:0010038//response to metal ion	peroxidase 22 [Arabidopsis thaliana]	ath:AT2G38380
CL14016.Contig1_NAU-YH	692	7	408	41	3.1267	172.002	15.927	5.78164	2.34876	-3.43288	Up	Up	Down	9.2e-104	3.08e-05	9.33e-82	-	GO:0043231//intracellular membrane-bounded organelle	-	-	hypothetical protein 24.t00017 [Brassica oleracea]	ath:AT2G13770
CL4124.Contig1_NAU-YH	1929	26	1489	57	4.16616	225.187	7.94328	5.75626	0.931016	-4.82524	Up	Up	Down	0	0.0208022	0	K01184|1|2e-22|106|aly:ARALYDRAFT_479028|polygalacturonase [EC:3.2.1.15]	-	GO:0004553//hydrolase activity, hydrolyzing O-glycosyl compounds	GO:0044238//primary metabolic process	glycoside hydrolase family 28 protein [Arabidopsis lyrata subsp. lyrata]	ath:AT3G61490
Unigene8218_NAU-YH	691	7	396	10	3.13123	167.185	3.89026	5.73857	0.313139	-5.42543	Up	Up	Down	2.11e-100	0.780849	5.62e-108	-	-	-	-	-	None
CL5475.Contig1_NAU-YH	1930	26	1402	60	4.164	211.92	8.35701	5.6694	1.00502	-4.66439	Up	Up	Down	0	0.0100261	0	K00318|1|0.0|821|ath:AT3G30775|proline dehydrogenase [EC:1.5.99.8]	GO:0043231//intracellular membrane-bounded organelle	GO:0016645//oxidoreductase activity, acting on the CH-NH group of donors	GO:0051707//response to other organism;GO:0009755//hormone-mediated signaling pathway;GO:0006605//protein targeting;GO:0014070//response to organic cyclic compound;GO:0009404//toxin metabolic process;GO:0009626//plant-type hypersensitive response;GO:0006536//glutamate metabolic process;GO:0006560//proline metabolic process;GO:0009694//jasmonic acid metabolic process	proline dehydrogenase [Brassica napus]	ath:AT3G30775	ERD5
Unigene30532_NAU-YH	481	5	217	25	3.21307	131.612	13.9718	5.3562	2.12049	-3.2357	Up	Up	Down	2.8e-53	0.00395485	4.03e-41	-	-	-	-	-	None
CL12654.Contig3_NAU-YH	1009	9	384	195	2.75706	111.025	51.9518	5.33161	4.23597	-1.09564	Up	Up	Down	2.34e-94	1.13e-39	2.41e-17	K13420|1|2e-18|91.7|vvi:100253808|LRR receptor-like serine/threonine-protein kinase FLS2 [EC:2.7.11.1]	GO:0005911//cell-cell junction;GO:0043231//intracellular membrane-bounded organelle;GO:0005618//cell wall;GO:0044444//cytoplasmic part	GO:0004857//enzyme inhibitor activity	GO:0006351//transcription, DNA-dependent;GO:0006984//ER-nucleus signaling pathway;GO:0007243//intracellular protein kinase cascade;GO:0009755//hormone-mediated signaling pathway;GO:0042743//hydrogen peroxide metabolic process;GO:0006605//protein targeting;GO:0046942//carboxylic acid transport;GO:0032787//monocarboxylic acid metabolic process;GO:0009626//plant-type hypersensitive response;GO:00064…	polygalacturonase inhibitor protein 9 [Brassica napus]	ath:AT5G06860	PGIP1
CL11190.Contig1_NAU-YH	1742	147	5886	1853	26.0834	985.718	285.946	5.23997	3.45454	-1.78543	Up	Up	Down	0	0	0	K00001|1|0.0|697|aly:ARALYDRAFT_895598|alcohol dehydrogenase [EC:1.1.1.1]	-	GO:0046914//transition metal ion binding;GO:0036094//small molecule binding;GO:0003824//catalytic activity	GO:0044710	alcohol dehydrogenase 1 [Brassica rapa]	ath:AT1G77120	ADH1
Unigene20499_NAU-YH	1543	189	7181	2608	37.8609	1357.69	454.359	5.1643	3.58505	-1.57925	Up	Up	Down	0	0	0	-	-	-	-	Pollen Ole e 1 allergen and extensin family protein [Arabidopsis thaliana]	ath:AT5G15780
Unigene30013_NAU-YH	217	3	112	513	4.27323	150.57	102.82	5.13896	4.58864	-0.550321	Up	Up	Down	6.84e-27	8.99e-18	0.0387068	K03283|1|7e-13|70.1|aly:ARALYDRAFT_487029|heat shock 70kDa protein 1/8	-	-	-	heat shock protein HSP70-1, partial [Arabidopsis thaliana]	ath:AT5G02500	HSC70-1
CL3772.Contig3_NAU-YH	1039	42	1559	735	12.4948	437.735	190.164	5.13066	3.92785	-1.20281	Up	Up	Down	0	3.49e-142	6.22e-81	-	-	GO:0003824//catalytic activity	GO:0060918//auxin transport;GO:0000097//sulfur amino acid biosynthetic process;GO:0043479;GO:0032535//regulation of cellular component size;GO:0045229//external encapsulating structure organization;GO:0048588//developmental cell growth;GO:0005976//polysaccharide metabolic process;GO:0009826//unidimensional cell growth;GO:0007275//multicellular organismal development	hypothetical protein ARALYDRAFT_488130 [Arabidopsis lyrata subsp. lyrata]	ath:AT5G13140
CL13965.Contig1_NAU-YH	209	2	72	513	2.95787	100.5	55.3069	5.0865	4.22483	-0.861666	Up	Up	Down	3.48e-17	6.99e-09	0.0101265	K00688|1|2e-06|48.9|aly:ARALYDRAFT_323006|starch phosphorylase [EC:2.4.1.1]	-	-	-	-	None
CL4829.Contig1_NAU-YH	892	33	1129	1057	11.4352	369.241	318.542	5.01301	4.79993	-0.213076	Up	Up	Down	4.18e-270	3.85e-233	0.0039691	-	GO:0005618//cell wall	-	GO:0048646//anatomical structure formation involved in morphogenesis;GO:0044260;GO:0000902//cell morphogenesis;GO:0009827//plant-type cell wall modification;GO:0010118//stomatal movement;GO:0010087//phloem or xylem histogenesis;GO:0009639//response to red or far red light	putative expansin [Arabidopsis thaliana]	ath:AT2G03090	EXPA15
Unigene8819_NAU-YH	316	4	123	513	3.91262	113.553	77.4126	4.85909	4.30636	-0.552726	Up	Up	Down	1e-28	9.39e-19	0.0276124	-	-	-	-	-	None
gi|332773150|gb|FY433333.1|FY433333	890	13	399	58	4.5149	130.787	17.5184	4.85638	1.95611	-2.90027	Up	Up	Down	1.43e-93	7.47e-06	6.95e-68	K13418|1|4e-45|179|rcu:RCOM_0186340|somatic embryogenesis receptor kinase 1 [EC:2.7.10.1 2.7.11.1];K13416|5|1e-44|178|ath:AT4G33430|brassinosteroid insensitive 1-associated receptor kinase 1 [EC:2.7.10.1 2.7.11.1]	-	-	-	hypothetical protein ARALYDRAFT_484589 [Arabidopsis lyrata subsp. lyrata]	ath:AT3G28040
Unigene30382_NAU-YH	648	42	1283	232	20.0341	577.607	96.2432	4.84956	2.26423	-2.58533	Up	Up	Down	1.18e-301	4.04e-26	5.89e-193	-	-	-	-	bifunctional inhibitor/lipid-transfer protein/seed storage 2S albumin superfamily protein [Arabidopsis thaliana]	ath:AT5G56480
CL10678.Contig2_NAU-YH	310	6	174	513	5.98252	163.745	13.0073	4.77455	1.12049	-3.65406	Up	Up	Down	2.74e-40	0.232991	1.05e-36	-	GO:0005576//extracellular region;GO:0005618//cell wall;GO:0009536//plastid	GO:0004175//endopeptidase activity	GO:0019538//protein metabolic process	aspartyl protease family protein [Arabidopsis thaliana]	ath:AT5G07030
gi|166144198|gb|FD577016.1|FD577016	717	12	338	75	5.17317	137.524	28.119	4.73249	2.44242	-2.29007	Up	Up	Down	4.47e-78	1.63e-09	5.92e-44	-	-	-	-	periaxin-like protein [Arabidopsis thaliana]	ath:AT5G09530
Unigene8918_NAU-YH	474	8	217	102	5.21683	133.556	57.8468	4.67812	3.47099	-1.20713	Up	Up	Down	1.04e-49	5.96e-18	1.38e-11	-	-	-	-	hypothetical protein [Arabidopsis thaliana]	ath:AT3G03341
Unigene6175_NAU-YH	734	60	1608	988	25.2668	639.102	361.841	4.66073	3.84004	-0.82069	Up	Up	Down	0	5.48e-188	2.53e-44	-	-	-	-	predicted protein [Arabidopsis lyrata subsp. lyrata]	None
CL3416.Contig2_NAU-YH	586	10	264	186	5.27469	131.428	85.3243	4.63904	4.0158	-0.623241	Up	Up	Down	3.14e-60	1.75e-36	6.16e-05	K01955|1|3e-24|109|vvi:100262205|carbamoyl-phosphate synthase large subunit [EC:6.3.5.5];K13944|2|6e-21|98.6|aly:ARALYDRAFT_903598|LOB domain-containing protein 16	-	-	GO:0010160//formation of organ boundary	LOB domain-containing protein 25 [Arabidopsis thaliana]	ath:AT3G27650	LBD25
Unigene24608_NAU-YH	744	56	1385	465	23.2654	543.072	168.011	4.54489	2.8523	-1.69259	Up	Up	Down	0	1.46e-67	1.63e-120	-	-	-	-	unnamed protein product [Vitis vinifera]	None
CL60.Contig2_NAU-YH	1260	29	703	91	7.11414	162.767	19.4146	4.51597	1.44838	-3.06759	Up	Up	Down	2.63e-158	4.81e-06	8.02e-127	K05933|1|7e-159|558|aly:ARALYDRAFT_678892|aminocyclopropanecarboxylate oxidase [EC:1.14.17.4]	GO:0005911//cell-cell junction;GO:0009536//plastid;GO:0016020//membrane;GO:0030312//external encapsulating structure	GO:0046914//transition metal ion binding;GO:0051536//iron-sulfur cluster binding;GO:0016705//oxidoreductase activity, acting on paired donors, with incorporation or reduction of molecular oxygen;GO:0016641//oxidoreductase activity, acting on the CH-NH2 group of donors, oxygen as acceptor;GO:0016836//hydro-lyase activity	GO:0051603//proteolysis involved in cellular protein catabolic process;GO:0034614//cellular response to reactive oxygen species;GO:0009720//detection of hormone stimulus;GO:0072350//tricarboxylic acid metabolic process;GO:0051707//response to other organism;GO:0006007//glucose catabolic process;GO:0015698//inorganic anion transport;GO:0070542//response to fatty acid;GO:0010039//response to iron i…	ACC oxidase [Brassica rapa subsp. rapa]	ath:AT1G12010
Unigene24449_NAU-YH	919	14	330	330	4.70877	104.756	96.5285	4.47554	4.35753	-0.118006	Up	Up	Down	9.91e-74	1.76e-68	0.522248	K08286|1|1e-25|115|ath:AT4G28490|protein-serine/threonine kinase [EC:2.7.11.-]	-	-	GO:0044237//cellular metabolic process;GO:0007165//signal transduction;GO:0006952//defense response	receptor like protein 46 [Arabidopsis thaliana]	ath:AT4G04220	RLP46
CL9328.Contig1_NAU-YH	450	8	186	513	5.49506	120.582	11.9474	4.45573	1.12049	-3.33524	Up	Up	Down	2.3e-41	0.152843	3.04e-36	-	-	GO:0016740//transferase activity	-	O-fucosyltransferase family protein [Arabidopsis thaliana]	ath:AT5G65470
Unigene15820_NAU-YH	320	7	155	513	6.7615	141.307	112.567	4.38534	4.0573	-0.328041	Up	Up	Down	4.07e-34	1.71e-26	0.167677	-	-	-	-	-	None
CL2019.Contig3_NAU-YH	1842	77	1651	116	12.921	261.48	16.9288	4.33891	0.389761	-3.94915	Up	Up	Down	0	0.165953	0	K01177|1|3e-128|457|rcu:RCOM_1615230|beta-amylase [EC:3.2.1.2]	GO:0009536//plastid	GO:0016160//amylase activity;GO:0043167//ion binding	GO:0005982//starch metabolic process;GO:0051707//response to other organism	beta-amylase [Raphanus sativus]	ath:AT4G15210	BAM5
CL3735.Contig1_NAU-YH	1655	153	3124	3081	28.5751	550.673	500.439	4.26836	4.13036	-0.138002	Up	Up	Down	0	0	0.00135186	-	-	-	GO:0009628//response to abiotic stimulus;GO:0006950//response to stress;GO:1901700	stress responsive protein [Brassica oleracea var. acephala]	ath:AT5G52310	LTI78
Unigene21362_NAU-YH	551	11	194	513	6.17072	102.714	92.6956	4.05705	3.90899	-0.148063	Up	Up	Down	1.55e-40	1.52e-36	0.553879	-	-	-	-	-	None
Unigene8256_NAU-YH	821	83	1362	102	31.2485	483.966	33.3975	3.95304	0.095952	-3.85709	Up	Up	Down	2.16e-280	0.753218	4.18e-302	-	GO:0031224//intrinsic to membrane	-	GO:0009628//response to abiotic stimulus	hypothetical protein ARALYDRAFT_904270 [Arabidopsis lyrata subsp. lyrata]	ath:AT2G47930	AGP26
CL7420.Contig1_NAU-YH	974	30	460	171	9.52044	137.778	47.1948	3.85517	2.30953	-1.54564	Up	Up	Down	1.02e-92	8.37e-20	3.97e-35	K14488|1|1e-52|205|ath:AT2G16580|SAUR family protein	GO:0043231//intracellular membrane-bounded organelle	GO:0005515//protein binding	GO:0009755//hormone-mediated signaling pathway	SAUR-like auxin-responsive protein [Arabidopsis thaliana]	ath:AT2G16580
Unigene12972_NAU-YH	436	22	315	307	15.5966	210.768	189.282	3.75635	3.60123	-0.155119	Up	Up	Down	3.62e-62	2.12e-55	0.400475	-	GO:0043231//intracellular membrane-bounded organelle	-	-	hypothetical protein [Arabidopsis thaliana]	ath:AT3G04510	LSH2
CL10105.Contig1_NAU-YH	1652	82	1139	765	15.3426	201.138	124.483	3.71257	3.02033	-0.692242	Up	Up	Down	3.29e-223	8.6e-118	1.84e-23	-	GO:0009536//plastid	-	-	hypothetical protein [Arabidopsis thaliana]	ath:AT1G65900
Unigene12980_NAU-YH	614	31	423	79	15.6059	200.98	34.5872	3.68689	1.14815	-2.53874	Up	Up	Down	2.75e-82	0.000581429	3.42e-62	-	GO:0043231//intracellular membrane-bounded organelle	-	-	hypothetical protein ARALYDRAFT_919160 [Arabidopsis lyrata subsp. lyrata]	ath:AT5G59305
CL1496.Contig2_NAU-YH	354	14	188	513	12.2242	154.93	101.756	3.66381	3.0573	-0.606505	Up	Up	Down	2.34e-36	5.46e-21	0.00146818	-	GO:0016020//membrane	GO:0032550;GO:0004672//protein kinase activity	GO:0006351//transcription, DNA-dependent;GO:0009696//salicylic acid metabolic process;GO:0007243//intracellular protein kinase cascade;GO:0016044//cellular membrane organization;GO:0009755//hormone-mediated signaling pathway;GO:0042743//hydrogen peroxide metabolic process;GO:0006605//protein targeting;GO:0007167//enzyme linked receptor protein signaling pathway;GO:0014070//response to organic cyc…	concanavalin A-like lectin kinase-like protein [Arabidopsis thaliana]	ath:AT4G02420
Unigene30649_NAU-YH	935	27	354	114	8.9258	110.452	32.7756	3.62929	1.87657	-1.75272	Up	Up	Down	5.82e-68	2.13e-10	2.14e-32	-	-	-	-	-	None
Unigene8274_NAU-YH	1573	139	1814	1703	27.3137	336.426	291.034	3.62259	3.41349	-0.209102	Up	Up	Down	0	2.8e-294	0.00017918	K01568|1|0.0|867|aly:ARALYDRAFT_495579|pyruvate decarboxylase [EC:4.1.1.1]	GO:0044444//cytoplasmic part	GO:0019842//vitamin binding;GO:0046872//metal ion binding;GO:0016831//carboxy-lyase activity	GO:0006996//organelle organization;GO:0051603//proteolysis involved in cellular protein catabolic process;GO:0006006//glucose metabolic process;GO:0006950//response to stress	pyruvate decarboxylase-2 [Arabidopsis lyrata subsp. lyrata]	ath:AT5G54960	PDC2
Unigene20077_NAU-YH	923	26	334	35	8.70696	105.566	10.1935	3.59984	0.227409	-3.37243	Up	Up	Down	1.1e-63	0.703806	7.99e-66	-	GO:0043231//intracellular membrane-bounded organelle;GO:0005576//extracellular region;GO:0030312//external encapsulating structure	-	GO:0006351//transcription, DNA-dependent;GO:0009696//salicylic acid metabolic process;GO:0007243//intracellular protein kinase cascade;GO:0010243//response to organic nitrogen;GO:0016044//cellular membrane organization;GO:0009718//anthocyanin-containing compound biosynthetic process;GO:0009755//hormone-mediated signaling pathway;GO:0042743//hydrogen peroxide metabolic process;GO:0006605//protein …	hypothetical protein ARALYDRAFT_316436 [Arabidopsis lyrata subsp. lyrata]	ath:AT1G75050
CL5175.Contig3_NAU-YH	659	358	4509	987	167.916	1996.07	402.614	3.57135	1.26166	-2.30969	Up	Up	Down	0	8.18e-49	0	-	-	GO:0046914//transition metal ion binding	GO:0030003//cellular cation homeostasis;GO:0006950//response to stress;GO:0006006//glucose metabolic process;GO:0010038//response to metal ion	metallothionein-like protein [Brassica rapa]	ath:AT3G09390	MT2A
CL837.Contig2_NAU-YH	644	168	2106	2117	80.634	954.01	883.674	3.56454	3.45405	-0.11049	Up	Up	Down	0	0	0.0554881	-	-	-	-	AT1G62480 [Arabidopsis thaliana]	None
CL1164.Contig3_NAU-YH	1659	59	732	388	10.9926	128.72	62.8699	3.54963	2.51584	-1.03379	Up	Up	Down	4.07e-138	3.3e-49	7.88e-30	-	-	GO:0016740//transferase activity	-	O-fucosyltransferase family protein [Arabidopsis thaliana]	ath:AT5G65470
Unigene5945_NAU-YH	651	94	1129	298	44.6315	505.933	123.053	3.50281	1.46315	-2.03967	Up	Up	Down	9.26e-211	1.04e-18	7.87e-127	-	-	-	-	arabinogalactan protein 27 [Arabidopsis thaliana]	ath:AT3G06360	AGP27
gi|158940971|gb|EX903303.1|EX903303	790	27	322	178	10.5641	118.908	60.569	3.4926	2.51941	-0.973189	Up	Up	Down	7.67e-60	9.5e-23	4.25e-12	K14945|1|6e-63|154|gmx:100789866|protein quaking	-	-	-	RNA-binding KH domain-containing protein [Arabidopsis thaliana]	ath:AT5G56140
Unigene24448_NAU-YH	525	18	211	114	10.5976	117.248	58.3718	3.46775	2.46153	-1.00622	Up	Up	Down	5.73e-39	2.45e-14	1.61e-08	-	-	GO:0003824//catalytic activity	GO:0006351//transcription, DNA-dependent;GO:0007243//intracellular protein kinase cascade;GO:0009755//hormone-mediated signaling pathway;GO:0042743//hydrogen peroxide metabolic process;GO:0006605//protein targeting;GO:0009626//plant-type hypersensitive response;GO:0006470//protein dephosphorylation;GO:0009627//systemic acquired resistance	hypothetical protein ARALYDRAFT_490081 [Arabidopsis lyrata subsp. lyrata]	ath:AT4G04220	RLP46
CL1835.Contig1_NAU-YH	1100	511	5975	2953	143.59	1584.62	721.652	3.46412	2.32935	-1.13476	Up	Up	Down	0	0	7.54e-283	-	-	GO:0005488//binding	GO:0052386//cell wall thickening;GO:0016044//cellular membrane organization;GO:0009555//pollen development;GO:0010876//lipid localization	protease inhibitor/seed storage/LTP family protein [Arabidopsis thaliana]	ath:AT3G22142
Unigene13200_NAU-YH	1392	47	530	67	10.4365	111.075	12.9388	3.41183	0.310066	-3.10177	Up	Up	Down	1.41e-96	0.452069	1.36e-96	-	-	-	-	hypothetical protein ARALYDRAFT_339371 [Arabidopsis lyrata subsp. lyrata]	ath:AT1G71360
gi|166117822|gb|FD547817.1|FD547817	487	15	168	513	9.52044	100.638	45.2629	3.402	2.24923	-1.15277	Up	Up	Down	1.53e-30	1.87e-09	1.83e-08	K08235|1|3e-44|175|aly:ARALYDRAFT_482667|xyloglucan:xyloglucosyl transferase [EC:2.4.1.207]	-	-	-	xyloglucan:xyloglucosyl transferase [Arabidopsis thaliana]	ath:AT3G44990	XTR8
Unigene9476_NAU-YH	1344	42	469	175	9.65928	101.801	35.0022	3.3977	1.85746	-1.54024	Up	Up	Down	3.93e-85	1.78e-15	1.26e-35	-	-	-	-	-	None
CL8963.Contig1_NAU-YH	257	13	144	513	15.6353	163.459	143.299	3.38606	3.19616	-0.189899	Up	Up	Down	4.4e-26	2.34e-22	0.512238	-	GO:0043231//intracellular membrane-bounded organelle	-	GO:0000902//cell morphogenesis;GO:0009639//response to red or far red light	light-dependent short hypocotyls 1 [Arabidopsis lyrata subsp. lyrata]	ath:AT5G28490	LSH1
gnl|UG|Rsa#S42049329	1011	2105	22415	20684	643.57	6467.97	5499.72	3.32914	3.09519	-0.233955	Up	Up	Down	0	0	2.48e-61	K12818|1|3e-06|51.2|sbi:SORBI_01g044300|ATP-dependent RNA helicase DHX8/PRP22 [EC:3.6.4.13]	-	-	-	AT1G62480 [Arabidopsis thaliana]	None
CL8702.Contig1_NAU-YH	1138	61	634	303	16.5685	162.528	71.5744	3.29417	2.111	-1.18317	Up	Up	Down	5.87e-112	3.18e-31	3.93e-32	K00759|1|2e-88|323|aly:ARALYDRAFT_895993|adenine phosphoribosyltransferase [EC:2.4.2.7]	GO:0043231//intracellular membrane-bounded organelle;GO:0044444//cytoplasmic part;GO:0016020//membrane	GO:0015103//inorganic anion transmembrane transporter activity;GO:0016763//transferase activity, transferring pentosyl groups	GO:0043096//purine nucleobase salvage	hypothetical protein ARALYDRAFT_895993 [Arabidopsis lyrata subsp. lyrata]	ath:AT1G80050	APT2
Unigene13300_NAU-YH	823	48	490	101	18.0275	173.691	32.9897	3.26825	0.871815	-2.39643	Up	Up	Down	7.13e-86	0.00224556	2.54e-67	K01047|1|6e-67|252|ath:AT2G06925|phospholipase A2 [EC:3.1.1.4]	GO:0043231//intracellular membrane-bounded organelle	GO:0004620//phospholipase activity	GO:0006629//lipid metabolic process;GO:0006796//phosphate-containing compound metabolic process	Phospholipase A2-like protein [Arabidopsis thaliana]	ath:AT2G06925	PLA2-ALPHA
CL13027.Contig2_NAU-YH	2484	119	1150	519	14.8078	135.06	56.1659	3.18917	1.92334	-1.26583	Up	Up	Down	3.42e-197	2.92e-47	1.02e-64	K06694|1|4e-09|62.0|ath:AT2G03430|26S proteasome non-ATPase regulatory subunit 10	-	-	-	ankyrin repeat-containing protein [Arabidopsis thaliana]	ath:AT3G01750
gi|161574369|gb|EY945774.1|EY945774	738	52	494	146	21.7792	195.277	53.1807	3.1645	1.28795	-1.87655	Up	Up	Down	5.41e-84	6.57e-08	1.29e-49	-	-	GO:0016787//hydrolase activity;GO:0005488//binding	GO:0019538//protein metabolic process;GO:0051234//establishment of localization;GO:0010876//lipid localization	protease inhibitor/seed storage/lipid transfer protein family protein [Arabidopsis lyrata subsp. lyrata]	ath:AT2G18370
CL5115.Contig3_NAU-YH	1390	63	584	251	14.0094	122.568	48.5418	3.12912	1.79283	-1.33629	Up	Up	Down	3.01e-98	5.47e-21	8.33e-36	K13424|1|6e-23|107|sbi:SORBI_09g023270|WRKY transcription factor 33	-	GO:0003677//DNA binding;GO:0001071//nucleic acid binding transcription factor activity	GO:0006351//transcription, DNA-dependent	hypothetical protein ARALYDRAFT_490719 [Arabidopsis lyrata subsp. lyrata]	ath:AT4G39410	WRKY13
Unigene26682_NAU-YH	1454	58	528	149	12.3299	105.938	27.5473	3.10299	1.15975	-1.94323	Up	Up	Down	4.19e-88	6.08e-07	1.36e-55	K15401|1|0.0|867|aly:ARALYDRAFT_497374|cytochrome P450, family 86, subfamily A, polypeptide 1 (fatty acid omega-hydroxylase) [EC:1.14.-.-]	GO:0043231//intracellular membrane-bounded organelle	GO:0046906//tetrapyrrole binding;GO:0046914//transition metal ion binding;GO:0016713;GO:0016712//oxidoreductase activity, acting on paired donors, with incorporation or reduction of molecular oxygen, reduced flavin or flavoprotein as one donor, and incorporation of one atom of oxygen	GO:0032787//monocarboxylic acid metabolic process;GO:0009059//macromolecule biosynthetic process;GO:0030001//metal ion transport	cytochrome P450 [Arabidopsis lyrata subsp. lyrata]	ath:AT5G58860	CYP86A1
CL550.Contig2_NAU-YH	2021	148	1309	527	22.6355	188.953	70.0973	3.06137	1.63077	-1.4306	Up	Up	Down	8.94e-216	2.77e-38	6.16e-89	-	-	-	-	-	None
CL1867.Contig1_NAU-YH	1608	67	586	101	12.879	106.314	16.8847	3.04524	0.390688	-2.65455	Up	Up	Down	5.2e-96	0.205552	1.14e-90	K15400|1|0.0|818|ath:AT5G41040|omega-hydroxypalmitate O-feruloyl transferase [EC:2.3.1.188]	-	GO:0016747//transferase activity, transferring acyl groups other than amino-acyl groups	GO:0009059//macromolecule biosynthetic process;GO:0009832//plant-type cell wall biogenesis	omega-hydroxypalmitate O-feruloyl transferase [Arabidopsis thaliana]	ath:AT5G41040
gi|158940851|gb|EX903183.1|EX903183	726	48	395	160	20.4362	158.723	59.2435	2.95732	1.53553	-1.42179	Up	Up	Down	7.79e-63	5.22e-11	1.11e-26	K02925|1|8e-109|389|aly:ARALYDRAFT_473757|large subunit ribosomal protein L3e	-	-	-	60S ribosomal protein L3-1 [Arabidopsis thaliana]	ath:AT1G43170	RP1
Unigene5942_NAU-YH	1684	168	1327	313	30.8363	229.884	49.9643	2.89821	0.696267	-2.20194	Up	Up	Down	5.39e-207	2.71e-06	1.46e-164	K13420|1|6e-34|144|vvi:100253808|LRR receptor-like serine/threonine-protein kinase FLS2 [EC:2.7.11.1]	GO:0005911//cell-cell junction;GO:0005618//cell wall	GO:0016628//oxidoreductase activity, acting on the CH-CH group of donors, NAD or NADP as acceptor;GO:0005198//structural molecule activity	GO:0048588//developmental cell growth;GO:0000902//cell morphogenesis;GO:0048764;GO:0044710;GO:0048528//post-embryonic root development	hypothetical protein ARALYDRAFT_475099 [Arabidopsis lyrata subsp. lyrata]	ath:AT1G62440	LRX2
CL8209.Contig1_NAU-YH	788	58	435	176	22.7508	161.044	60.0404	2.82346	1.40002	-1.42345	Up	Up	Down	5.72e-66	1.36e-10	2.08e-29	-	GO:0009536//plastid	-	-	Sterile alpha motif (SAM) domain-containing protein [Arabidopsis thaliana]	ath:AT1G80520
Unigene13013_NAU-YH	686	239	1747	1861	107.688	742.932	729.255	2.78637	2.75956	-0.0268074	Up	Up	Down	1.43e-261	2.15e-261	0.71374	-	-	-	-	-	None
CL11677.Contig2_NAU-YH	1638	85	612	368	16.0398	108.998	60.3936	2.76457	1.91274	-0.851832	Up	Up	Down	8.81e-91	2.38e-33	3.72e-18	-	-	GO:0016741;GO:0046914//transition metal ion binding	GO:0008152//metabolic process	RecName: Full=Probable methyltransferase PMT8	ath:AT1G04430
gi|158920731|gb|EX893822.1|EX893822	805	53	381	184	20.3505	138.073	61.4439	2.7623	1.59421	-1.16809	Up	Up	Down	1.81e-56	3.04e-13	4.87e-19	K14488|1|3e-53|206|aly:ARALYDRAFT_912336|SAUR family protein	GO:0043231//intracellular membrane-bounded organelle	GO:0005515//protein binding	GO:0009755//hormone-mediated signaling pathway	SAUR-like auxin-responsive protein [Arabidopsis thaliana]	ath:AT4G38860
CL3001.Contig2_NAU-YH	928	56	402	281	18.6524	126.374	81.3983	2.76027	2.12564	-0.634631	Up	Up	Down	1.6e-59	3.14e-29	2.02e-07	-	GO:0043231//intracellular membrane-bounded organelle	-	GO:0006950//response to stress;GO:0045333//cellular respiration	hypothetical protein [Arabidopsis thaliana]	ath:AT3G10020
Unigene12973_NAU-YH	227	28	201	122	38.1265	258.316	144.474	2.76027	1.92195	-0.83832	Up	Up	Down	7.89e-30	1.99e-11	3.84e-06	-	GO:0043231//intracellular membrane-bounded organelle	-	GO:0000902//cell morphogenesis;GO:0009639//response to red or far red light	hypothetical protein [Arabidopsis thaliana]	ath:AT3G04510	LSH2
gi|166123938|gb|FD558641.1|FD558641	484	177	1267	997	113.038	763.681	553.741	2.75617	2.29241	-0.463757	Up	Up	Down	1.96e-187	2.62e-113	7.43e-13	-	-	-	-	-	None
Unigene30364_NAU-YH	578	103	727	661	55.0813	366.933	307.419	2.73588	2.48057	-0.255311	Up	Up	Down	1.21e-106	1.88e-82	0.00647246	-	GO:0031224//intrinsic to membrane	-	GO:0009414//response to water deprivation;GO:0006325//chromatin organization;GO:0006952//defense response;GO:0006972//hyperosmotic response	salt and low temperature response protein [Brassica rapa subsp. pekinensis]	ath:AT4G30650
CL12010.Contig1_NAU-YH	684	52	367	159	23.4986	156.527	62.4882	2.73577	1.41101	-1.32476	Up	Up	Down	7.84e-54	9.87e-10	2.7e-22	-	-	-	-	light-dependent short hypocotyls 1 [Arabidopsis lyrata subsp. lyrata]	None
CL1396.Contig3_NAU-YH	1690	114	788	342	20.8503	136.025	54.3997	2.70573	1.38353	-1.32221	Up	Up	Down	3.22e-114	1.02e-19	1.78e-47	K14454|1|0.0|746|ath:AT5G19550|aspartate aminotransferase, cytoplasmic [EC:2.6.1.1]	GO:0005911//cell-cell junction;GO:0031090//organelle membrane;GO:0043231//intracellular membrane-bounded organelle;GO:0044444//cytoplasmic part;GO:0030312//external encapsulating structure	GO:0046914//transition metal ion binding;GO:0070546;GO:0043168	GO:0019752//carboxylic acid metabolic process;GO:0009692	aspartate aminotransferase [Arabidopsis thaliana]	ath:AT5G19550	ASP2
CL1521.Contig1_NAU-YH	1253	92	625	419	22.6951	145.516	89.8918	2.68072	1.98581	-0.694912	Up	Up	Down	1.14e-89	7.85e-40	3.85e-13	K12309|1|5e-77|286|ath:AT3G52840|beta-galactosidase [EC:3.2.1.23]	GO:0030312//external encapsulating structure	GO:0043167//ion binding;GO:0015925	GO:0044238//primary metabolic process	beta-galactosidase [Raphanus sativus]	ath:AT2G28470	BGAL8
CL8592.Contig2_NAU-YH	2748	189	1273	850	21.2589	135.143	83.1494	2.66835	1.96764	-0.700704	Up	Up	Down	8.3e-182	1.13e-79	9.56e-27	-	-	-	-	F15O4.11 [Arabidopsis thaliana]	ath:AT1G35660
CL3215.Contig3_NAU-YH	1972	109	727	513	17.085	107.549	69.9307	2.6542	2.0332	-0.621002	Up	Up	Down	3.59e-103	3.16e-50	1.53e-12	K13418|1|3e-59|228|aly:ARALYDRAFT_895025|somatic embryogenesis receptor kinase 1 [EC:2.7.10.1 2.7.11.1];K04733|3|5e-59|227|smo:SELMODRAFT_159261|interleukin-1 receptor-associated kinase 4 [EC:2.7.11.1];K13416|4|5e-59|227|rcu:RCOM_1534760|brassinosteroid insensitive 1-associated receptor kinase 1 [EC:2.7.10.1 2.7.11.1]	GO:0016020//membrane	GO:0032550;GO:0004672//protein kinase activity	GO:0006351//transcription, DNA-dependent;GO:0009696//salicylic acid metabolic process;GO:0007243//intracellular protein kinase cascade;GO:0016044//cellular membrane organization;GO:0009755//hormone-mediated signaling pathway;GO:0042743//hydrogen peroxide metabolic process;GO:0006605//protein targeting;GO:0007167//enzyme linked receptor protein signaling pathway;GO:0014070//response to organic cyc…	hypothetical protein ARALYDRAFT_482773 [Arabidopsis lyrata subsp. lyrata]	ath:AT2G37710	RLK
Unigene30390_NAU-YH	653	103	684	232	48.755	305.579	95.5063	2.64792	0.970047	-1.67788	Up	Up	Down	8.21e-97	5.41e-08	9.3e-59	-	GO:0043231//intracellular membrane-bounded organelle	-	-	hypothetical protein ARALYDRAFT_910661 [Arabidopsis lyrata subsp. lyrata]	ath:AT5G25940
gi|158923208|gb|EX896050.1|EX896050	816	143	945	680	54.1677	337.849	224.014	2.64087	2.04809	-0.592785	Up	Up	Down	2.19e-133	3.64e-67	6.55e-15	-	-	-	-	-	None
gi|158637686|gb|EX747577.1|EX747577	707	53	328	78	23.1713	135.343	29.6574	2.5462	0.356048	-2.19016	Up	Up	Down	1.85e-44	0.330921	2.34e-40	K15920|1|2e-101|366|aly:ARALYDRAFT_496670|beta-D-xylosidase 4 [EC:3.2.1.37]	GO:0005576//extracellular region;GO:0030312//external encapsulating structure	GO:0004553//hydrolase activity, hydrolyzing O-glycosyl compounds	GO:0000272//polysaccharide catabolic process	alpha-L-arabinofuranosidase [Raphanus sativus]	ath:AT5G64570	XYL4
Unigene18208_NAU-YH	1331	121	744	302	28.0997	163.07	60.9939	2.53687	1.11811	-1.41876	Up	Up	Down	2.31e-100	1.05e-12	6.34e-50	K00666|1|9e-101|365|sbi:SORBI_10g012080|fatty-acyl-CoA synthase [EC:6.2.1.-];K14760|2|4e-22|104|zma:100275595|acyl-activating enzyme 14 [EC:6.2.1.26];K01904|4|1e-19|96.3|smo:SELMODRAFT_115483|4-coumarate--CoA ligase [EC:6.2.1.12]	GO:0042579//microbody	GO:0016405//CoA-ligase activity;GO:0016878//acid-thiol ligase activity;GO:0032550	GO:0046459//short-chain fatty acid metabolic process;GO:0044262//cellular carbohydrate metabolic process	acyl-activating enzyme 7 [Arabidopsis thaliana]	ath:AT3G16910	AAE7
Unigene26256_NAU-YH	1314	100	610	318	23.5234	135.43	65.0562	2.52538	1.46759	-1.05779	Up	Up	Down	7.35e-82	5.15e-20	7.52e-26	-	GO:0043231//intracellular membrane-bounded organelle	GO:0046914//transition metal ion binding;GO:0097159//organic cyclic compound binding;GO:0001071//nucleic acid binding transcription factor activity	GO:0006952//defense response;GO:0051707//response to other organism;GO:0006625//protein targeting to peroxisome;GO:0009062//fatty acid catabolic process;GO:0006351//transcription, DNA-dependent	protein indeterminate(ID)-domain 11 [Arabidopsis thaliana]	ath:AT1G55110	IDD7
gi|156162738|gb|EW722884.1|EW722884	767	52	317	199	20.9557	120.571	69.7453	2.52447	1.73475	-0.78972	Up	Up	Down	1.49e-42	5.14e-16	1.68e-08	K02896|1|2e-61|233|ath:AT3G53020|large subunit ribosomal protein L24e	GO:0031981//nuclear lumen;GO:0009536//plastid;GO:0015934//large ribosomal subunit;GO:0016020//membrane	GO:0005198//structural molecule activity	GO:0009451//RNA modification;GO:0022613//ribonucleoprotein complex biogenesis;GO:0009755//hormone-mediated signaling pathway;GO:0048438//floral whorl development;GO:0010467//gene expression	60S ribosomal protein L24-2 [Arabidopsis thaliana]	ath:AT3G53020	STV1
CL626.Contig1_NAU-YH	312	29	174	513	28.7302	162.695	85.2978	2.50153	1.56994	-0.931593	Up	Up	Down	3.26e-23	3.01e-07	2.47e-06	K01568|1|4e-13|70.9|aly:ARALYDRAFT_486945|pyruvate decarboxylase [EC:4.1.1.1]	-	-	-	hypothetical protein ARALYDRAFT_486945 [Arabidopsis lyrata subsp. lyrata]	ath:AT5G01330	PDC3
Unigene5930_NAU-YH	782	418	2498	1063	165.221	931.893	365.413	2.49577	1.14513	-1.35064	Up	Up	Down	0	3.72e-45	1.56e-155	-	GO:0030312//external encapsulating structure	GO:0004857//enzyme inhibitor activity;GO:0052689	GO:0044092//negative regulation of molecular function	hypothetical protein ARALYDRAFT_891603 [Arabidopsis lyrata subsp. lyrata]	ath:AT1G47960	C/VIF1
Unigene18589_NAU-YH	920	186	1095	1005	62.4914	347.222	293.654	2.47413	2.23239	-0.241741	Up	Up	Down	1.5e-143	1.39e-110	0.00104913	K07213|1|4e-09|60.5|bdi:100823139|copper chaperone	GO:0005911//cell-cell junction;GO:0016020//membrane	GO:0043169//cation binding	GO:0006812//cation transport;GO:0009408//response to heat	farnesylated protein 6 [Arabidopsis thaliana]	ath:AT4G38580	FP6
gi|156170899|gb|EW731045.1|EW731045	736	304	1760	408	127.671	697.614	149.018	2.45	0.223064	-2.22694	Up	Up	Down	3.52e-228	0.115915	1.93e-221	-	-	-	-	-	None
Unigene22043_NAU-YH	579	47	263	180	25.0908	132.513	83.5701	2.4009	1.73583	-0.665072	Up	Up	Down	2.35e-33	1.51e-14	1.9e-05	-	-	-	GO:0031047//gene silencing by RNA;GO:0048438//floral whorl development;GO:0048444//floral organ morphogenesis;GO:0016569//covalent chromatin modification;GO:0006342//chromatin silencing;GO:0003002//regionalization;GO:0048507//meristem development	hypothetical protein ARALYDRAFT_915472 [Arabidopsis lyrata subsp. lyrata]	ath:AT4G14200
Unigene29857_NAU-YH	581	53	292	146	28.1965	146.618	67.5513	2.37848	1.26047	-1.11801	Up	Up	Down	1.32e-36	1.14e-07	1.03e-13	K10775|1|2e-68|256|aly:ARALYDRAFT_482690|phenylalanine ammonia-lyase [EC:4.3.1.24]	GO:0044424//intracellular part	GO:0016841//ammonia-lyase activity	GO:0009411//response to UV;GO:0006575//cellular modified amino acid metabolic process;GO:0006558//L-phenylalanine metabolic process;GO:0009813//flavonoid biosynthetic process;GO:0009414//response to water deprivation;GO:0048229//gametophyte development;GO:0009696//salicylic acid metabolic process;GO:0009808//lignin metabolic process;GO:0006595//polyamine metabolic process	phenylalanine ammonia-lyase, partial [Brassica rapa subsp. chinensis]	ath:AT2G37040	PAL1
CL1523.Contig1_NAU-YH	1504	577	3082	695	118.583	597.813	124.221	2.3338	0.0670077	-2.26679	Up	Up	Down	0	0.617962	0	-	GO:0031090//organelle membrane;GO:0031225//anchored to membrane	-	GO:0006996//organelle organization;GO:0016129;GO:0006637//acyl-CoA metabolic process;GO:0048588//developmental cell growth;GO:0006970//response to osmotic stress;GO:0070838//divalent metal ion transport	hypothetical protein ARALYDRAFT_497154 [Arabidopsis lyrata subsp. lyrata]	ath:AT4G12730	FLA2
gi|332782261|gb|FY440880.1|FY440880	771	63	334	224	25.257	126.378	78.1	2.323	1.62864	-0.694355	Up	Up	Down	1.11e-40	1.74e-16	3.05e-07	-	GO:0043231//intracellular membrane-bounded organelle;GO:0016020//membrane	-	GO:0045491//xylan metabolic process	protein IQ-DOMAIN 14 [Arabidopsis thaliana]	ath:AT2G43680	IQD14
CL11916.Contig2_NAU-YH	1015	558	2953	3060	169.927	848.746	810.424	2.32042	2.25376	-0.0666555	Up	Up	Down	0	0	0.21679	-	-	-	-	-	None
CL11833.Contig1_NAU-YH	983	179	945	311	56.2852	280.452	85.048	2.31693	0.595521	-1.72141	Up	Up	Down	1.32e-114	6.31e-05	3.44e-84	-	-	-	-	-	None
gi|166145084|gb|FD577782.1|FD577782	670	420	2201	615	193.762	958.353	246.75	2.30627	0.348763	-1.95751	Up	Up	Down	1.37e-265	0.00074307	2.52e-234	-	-	-	-	-	None
CL8787.Contig2_NAU-YH	2282	163	850	192	22.0784	108.664	22.6174	2.29916	0.0348004	-2.26436	Up	Up	Down	4e-102	0.891017	4.47e-109	-	GO:0009536//plastid	-	-	hypothetical protein [Arabidopsis thaliana]	ath:AT3G06150
CL3236.Contig2_NAU-YH	1473	546	2819	1938	114.574	558.307	353.678	2.28478	1.62616	-0.658621	Up	Up	Down	0	9.26e-140	7.14e-53	K08235|1|2e-156|550|aly:ARALYDRAFT_490240|xyloglucan:xyloglucosyl transferase [EC:2.4.1.207]	GO:0005576//extracellular region;GO:0030312//external encapsulating structure	GO:0016798//hydrolase activity, acting on glycosyl bonds;GO:0016758//transferase activity, transferring hexosyl groups	GO:0044042//glucan metabolic process;GO:0010073//meristem maintenance	xyloglucan endotransglycosylasehydrolase [Brassica rapa subsp. campestris]	ath:AT4G03210	XTH9
Unigene15912_NAU-YH	1372	315	1619	535	70.9662	344.249	104.823	2.27825	0.562753	-1.7155	Up	Up	Down	2.01e-192	2.95e-07	1.29e-143	K01376|1|1e-130|464|ath:AT3G43960|[EC:3.4.22.-]	GO:0031224//intrinsic to membrane;GO:0044444//cytoplasmic part	GO:0070011//peptidase activity, acting on L-amino acid peptides;GO:0016491//oxidoreductase activity	GO:0000097//sulfur amino acid biosynthetic process;GO:0016129;GO:0048588//developmental cell growth;GO:0019538//protein metabolic process;GO:0030001//metal ion transport	RecName: Full=Probable cysteine proteinase At3g43960; Flags: Precursor	ath:AT3G43960
gi|161555292|gb|EY927242.1|EY927242	665	142	707	167	66.0027	310.155	67.5075	2.23239	0.0325232	-2.19987	Up	Up	Down	6.18e-82	0.910025	1.73e-87	-	-	-	-	-	None
CL13349.Contig1_NAU-YH	941	79	388	376	25.9497	120.288	107.413	2.2127	2.04937	-0.16333	Up	Up	Down	1.6e-44	3.01e-37	0.295915	-	GO:0009941//chloroplast envelope;GO:0016020//membrane	GO:0046872//metal ion binding;GO:0016705//oxidoreductase activity, acting on paired donors, with incorporation or reduction of molecular oxygen;GO:0016702//oxidoreductase activity, acting on single donors with incorporation of molecular oxygen, incorporation of two atoms of oxygen;GO:0004497//monooxygenase activity	GO:0051707//response to other organism;GO:0006631//fatty acid metabolic process;GO:0044763;GO:0009725//response to hormone stimulus;GO:0009414//response to water deprivation;GO:0014070//response to organic cyclic compound;GO:0006972//hyperosmotic response	caleosin CLO3-2 [Brassica napus]	ath:AT2G33380	RD20
Unigene24693_NAU-YH	1094	96	467	456	27.1237	124.532	112.048	2.19889	2.04649	-0.152395	Up	Up	Down	3.8e-53	4.83e-45	0.277323	-	GO:0031225//anchored to membrane	GO:0043167//ion binding;GO:0008422//beta-glucosidase activity	GO:0044238//primary metabolic process	glycosyl hydrolase family 17 protein [Arabidopsis lyrata subsp. lyrata]	ath:AT1G32860
CL9419.Contig1_NAU-YH	880	93	442	123	32.6659	146.528	37.5733	2.16532	0.201922	-1.96339	Up	Up	Down	2.36e-49	0.494551	3.44e-47	-	GO:0016020//membrane	GO:0005488//binding	GO:0030001//metal ion transport	hypothetical protein [Arabidopsis thaliana]	ath:AT5G44550
CL3061.Contig6_NAU-YH	211	16	76	513	23.4386	105.078	99.3732	2.1645	2.08397	-0.0805311	Up	Up	Down	8.51e-09	2.9e-08	0.82638	K02930|1|7e-22|100|ath:AT5G02870|large subunit ribosomal protein L4e	GO:0030312//external encapsulating structure;GO:0031981//nuclear lumen;GO:0009536//plastid;GO:0015934//large ribosomal subunit;GO:0005911//cell-cell junction;GO:0031090//organelle membrane	GO:0005198//structural molecule activity	GO:0009451//RNA modification;GO:0071555//cell wall organization;GO:0006221//pyrimidine nucleotide biosynthetic process;GO:0010467//gene expression	putative 60S ribosomal protein [Arabidopsis thaliana]	ath:AT5G02870
gi|158916784|gb|EX889326.1|EX889326	716	53	249	116	22.8801	101.453	43.5514	2.14865	0.928627	-1.22003	Up	Up	Down	1.24e-27	0.000423849	1.88e-13	-	-	-	-	RecName: Full=Probable methyltransferase PMT21; AltName: Full=Protein EARLY-RESPONSIVE TO DEHYDRATION 3	ath:AT4G19120	ERD3
CL3323.Contig1_NAU-YH	838	119	559	472	43.8933	194.602	151.41	2.14846	1.78639	-0.362067	Up	Up	Down	8.98e-62	6.03e-39	0.000534322	K07374|1|1e-114|410|aly:ARALYDRAFT_488871|tubulin alpha	GO:0005911//cell-cell junction;GO:0016020//membrane;GO:0015630//microtubule cytoskeleton;GO:0043234//protein complex;GO:0030312//external encapsulating structure;GO:0044444//cytoplasmic part	GO:0005198//structural molecule activity;GO:0032550;GO:0017111//nucleoside-triphosphatase activity	GO:0006928//cellular component movement;GO:0009629//response to gravity;GO:0010038//response to metal ion;GO:0043623//cellular protein complex assembly;GO:0009154//purine ribonucleotide catabolic process	tubulin alpha-3alpha-5 chain [Arabidopsis thaliana]	ath:AT5G19780	TUA5
CL709.Contig3_NAU-YH	1468	114	532	344	24.0034	105.722	62.9926	2.13896	1.39194	-0.747024	Up	Up	Down	1.8e-58	5.22e-20	1.04e-12	-	GO:0043231//intracellular membrane-bounded organelle	-	-	RecName: Full=Probable methyltransferase PMT25	ath:AT2G34300
Unigene22168_NAU-YH	594	123	573	544	64.0049	281.416	246.19	2.13645	1.94351	-0.192934	Up	Up	Down	7.12e-63	3.25e-50	0.0954262	-	-	-	-	conserved peptide upstream open reading frame 43 [Arabidopsis thaliana]	ath:AT5G09461	CPuORF43
gi|158921337|gb|EX894105.1|EX894105	876	92	412	385	32.4622	137.206	118.145	2.07951	1.86372	-0.215792	Up	Up	Down	1.02e-43	1.07e-33	0.12226	-	-	-	-	hypothetical protein [Arabidopsis thaliana]	ath:AT5G40450
CL5301.Contig1_NAU-YH	1627	641	2840	1365	121.777	509.227	225.529	2.06407	0.889071	-1.175	Up	Up	Down	2.9e-298	2.52e-38	4.38e-142	-	GO:0005618//cell wall;GO:0031225//anchored to membrane;GO:0005576//extracellular region	-	GO:0071555//cell wall organization;GO:0009653//anatomical structure morphogenesis;GO:0007275//multicellular organismal development;GO:0042546//cell wall biogenesis;GO:0060918//auxin transport;GO:0032535//regulation of cellular component size	endosperm-specific protein-like protein [Arabidopsis thaliana]	ath:AT2G45470	FLA8
gi|161567634|gb|EY939201.1|EY939201	624	66	292	284	32.693	136.514	122.346	2.062	1.90392	-0.158083	Up	Up	Down	9.95e-31	1.17e-25	0.411762	-	-	-	-	hypothetical protein [Arabidopsis thaliana]	ath:AT5G40450
CL11188.Contig4_NAU-YH	1650	371	1641	1380	69.5	290.138	224.829	2.06166	1.69374	-0.367913	Up	Up	Down	5.14e-172	1.88e-105	6.73e-11	K00924|1|6e-23|107|ath:AT5G22850|[EC:2.7.1.-]	GO:0005576//extracellular region	GO:0004175//endopeptidase activity	GO:0019538//protein metabolic process;GO:0033554//cellular response to stress;GO:0009814//defense response, incompatible interaction;GO:0007243//intracellular protein kinase cascade	hypothetical protein ARALYDRAFT_325615 [Arabidopsis lyrata subsp. lyrata]	ath:AT5G10770
CL10957.Contig1_NAU-YH	1851	621	2686	808	103.7	423.331	117.344	2.02937	0.178328	-1.85104	Up	Up	Down	6.35e-276	0.0642081	3.8e-265	K01904|1|5e-46|184|aly:ARALYDRAFT_490166|4-coumarate--CoA ligase [EC:6.2.1.12]	GO:0005576//extracellular region;GO:0009536//plastid	GO:0016405//CoA-ligase activity	GO:0010038//response to metal ion	AMP-dependent synthetase and ligase family protein [Arabidopsis lyrata subsp. lyrata]	ath:AT3G48990
CL12933.Contig1_NAU-YH	1560	6707	28793	21914	1328.92	5384.47	3776.19	2.01855	1.50668	-0.511871	Up	Up	Down	0	0	0	K00514|1|5e-21|100|rcu:RCOM_1428040|zeta-carotene desaturase [EC:1.3.5.6];K01206|2|7e-17|87.0|ath:AT1G67830|alpha-L-fucosidase [EC:3.2.1.51]	GO:0005911//cell-cell junction;GO:0005840//ribosome;GO:0042579//microbody;GO:0005576//extracellular region;GO:0031090//organelle membrane;GO:0009526//plastid envelope	GO:0016787//hydrolase activity	GO:0051707//response to other organism;GO:0006007//glucose catabolic process;GO:0006090//pyruvate metabolic process;GO:0019758;GO:0005982//starch metabolic process;GO:0019759;GO:0006952//defense response	epithiospecifier modifier [Brassica rapa subsp. pekinensis]	ath:AT3G14210	ESM1
Unigene24695_NAU-YH	487	77	328	175	48.8716	196.483	96.5976	2.00734	0.982991	-1.02435	Up	Up	Down	2.62e-33	2.58e-06	2.28e-13	-	GO:0031225//anchored to membrane	GO:0004553//hydrolase activity, hydrolyzing O-glycosyl compounds;GO:0043167//ion binding	GO:0044238//primary metabolic process	glycosyl hydrolase family 17 protein [Arabidopsis lyrata subsp. lyrata]	ath:AT1G32860
Unigene8764_NAU-YH	830	0	564	513	0.01	198.236	0.01	14.2749	0	-14.2749	Up	unchanged	Down	5.49e-161		5.22e-178	-	-	-	-	-	None
Unigene5970_NAU-YH	939	0	456	513	0.01	141.671	0.01	13.7903	0	-13.7903	Up	unchanged	Down	6.28e-130		1.21e-143	-	-	-	-	-	None
gi|167432251|gb|FD939549.1|FD939549	617	0	215	513	0.01	101.656	0.01	13.3114	0	-13.3114	Up	unchanged	Down	1e-60		4.26e-67	-	-	-	-	hypothetical protein 24.t00017 [Brassica oleracea]	ath:AT2G13770
Unigene24635_NAU-YH	1133	1	1098	0	0.272813	282.718	0.01	10.0172	-4.76984	-14.7871	Up	Down	Down	0	0.601625	0	-	-	-	-	-	None
gi|167482132|gb|FD969504.1|FD969504	335	1	323	1	0.922678	281.28	0.80244	8.25196	-0.201434	-8.4534	Up	Down	Down	1.59e-89	0.930089	3.83e-99	-	-	-	-	-	None
Unigene30509_NAU-YH	944	2	645	0	0.654867	199.328	0.01	8.24973	-6.03313	-14.2829	Up	Down	Down	1.27e-179	0.381287	8.98e-204	-	-	-	-	-	None
Unigene5931_NAU-YH	905	160	7297	126	54.647	2352.21	37.4265	5.42773	-0.546082	-5.97381	Up	Down	Down	0	0.00658134	0	-	-	-	GO:0044699	hypothetical protein ARALYDRAFT_914370 [Arabidopsis lyrata subsp. lyrata]	ath:AT4G22460
Unigene13145_NAU-YH	693	20	796	14	8.92055	335.089	5.43065	5.23127	-0.716007	-5.94728	Up	Down	Down	2.33e-194	0.315958	4e-226	-	-	-	-	-	None
gi|167447119|gb|FD952443.1|FD952443	759	40	1282	26	16.2897	492.75	9.2085	4.91882	-0.822922	-5.74175	Up	Down	Down	9.04e-304	0.0686932	0	-	-	-	-	bifunctional inhibitor/lipid-transfer protein/seed storage 2S albumin-like protein [Arabidopsis thaliana]	ath:AT1G62500
gi|158653695|gb|EX763586.1|EX763586	628	67	1974	32	32.9769	916.997	13.6977	4.79739	-1.26752	-6.06491	Up	Down	Down	0	0.00016438	0	-	-	-	-	bifunctional inhibitorlipid-transfer proteinseed storage 2S albumin-like prote	ath:AT1G62500
Unigene5892_NAU-YH	1026	16	457	0	4.82023	129.942	0.01	4.75262	-8.91296	-13.6656	Up	Down	Down	6.04e-106	3.56e-05	5.82e-144	-	-	-	-	-	None
gi|167449410|gb|FD954975.1|FD954975	548	18	410	9	10.1528	218.265	4.41488	4.42613	-1.20143	-5.62756	Up	Down	Down	4.88e-91	0.107164	1.27e-113	-	-	-	-	-	None
CL3457.Contig3_NAU-YH	703	19	404	6	8.35397	167.651	2.29432	4.32686	-1.8644	-6.19125	Up	Down	Down	2.16e-88	0.0133278	4.73e-116	-	-	-	-	-	None
CL4453.Contig4_NAU-YH	640	104	1850	97	50.2283	843.281	40.7426	4.06944	-0.301961	-4.3714	Up	Down	Down	0	0.288985	0	-	-	GO:0046914//transition metal ion binding;GO:0008289//lipid binding	GO:0009627//systemic acquired resistance	bifunctional inhibitor/lipid-transfer protein/seed storage 2S albumin-like protein [Arabidopsis thaliana]	ath:AT5G48485	DIR1
Unigene20230_NAU-YH	321	28	498	17	26.9617	452.59	14.2364	4.06922	-0.921326	-4.99054	Up	Down	Down	1.65e-104	0.10323	1.83e-130	-	-	GO:0016623	-	predicted protein [Arabidopsis lyrata subsp. lyrata]	ath:AT5G39110
Unigene25665_NAU-YH	1523	55	875	0	11.1624	167.606	0.01	3.90835	-10.1244	-14.0328	Up	Down	Down	1.86e-178	1.31e-17	5.04e-277	-	-	-	-	-	None
CL12324.Contig2_NAU-YH	1944	265	3883	206	42.1351	582.709	28.4858	3.78968	-0.564782	-4.35446	Up	Down	Down	0	0.000159761	0	K11778|1|2e-16|86.3|ath:AT5G58784|ditrans,polycis-polyprenyl diphosphate synthase [EC:2.5.1.87]	-	GO:0004659//prenyltransferase activity	GO:0016094	dehydrodolichyl diphosphate synthase 5 [Arabidopsis thaliana]	ath:AT5G58784
gi|156159932|gb|EW720078.1|EW720078	766	32	467	2	12.9127	177.856	0.701873	3.78385	-4.20143	-7.98528	Up	Down	Down	8.96e-93	4.71e-08	1.09e-142	-	-	-	-	extensin-like protein [Arabidopsis thaliana]	ath:AT1G12090	ELP
gi|158919099|gb|EX892100.1|EX892100	773	29	399	0	11.5961	150.582	0.01	3.69884	-10.1794	-13.8783	Up	Down	Down	8.31e-78	2.98e-09	1.59e-125	K06890|1|2e-91|333|aly:ARALYDRAFT_493344|	GO:0031224//intrinsic to membrane	-	GO:0044765;GO:0000902//cell morphogenesis;GO:0016044//cellular membrane organization;GO:0043401//steroid hormone mediated signaling pathway;GO:0016192//vesicle-mediated transport	hypothetical protein ARALYDRAFT_493344 [Arabidopsis lyrata subsp. lyrata]	ath:AT4G15470
Unigene12984_NAU-YH	275	20	271	16	22.4798	287.486	15.6403	3.67679	-0.523362	-4.20015	Up	Down	Down	1.44e-52	0.475555	1.12e-63	-	-	-	-	-	None
Unigene30366_NAU-YH	791	139	1777	129	54.3167	655.377	43.84	3.59286	-0.309148	-3.90201	Up	Down	Down	0	0.193878	0	K02605|1|3e-06|45.8|smo:SELMODRAFT_418877|origin recognition complex subunit 3	-	GO:0046914//transition metal ion binding;GO:0008289//lipid binding;GO:0022892;GO:0016787//hydrolase activity	GO:0009627//systemic acquired resistance;GO:0010876//lipid localization;GO:0019538//protein metabolic process	bifunctional inhibitor/lipid-transfer protein/seed storage 2S albumin superfamily protein [Arabidopsis thaliana]	ath:AT5G48490
Unigene13173_NAU-YH	733	37	417	36	15.6024	165.963	13.2025	3.41102	-0.240962	-3.65198	Up	Down	Down	6.12e-76	0.622328	3.73e-88	-	-	-	GO:0010087//phloem or xylem histogenesis;GO:0044260	hypothetical protein ARALYDRAFT_473282 [Arabidopsis lyrata subsp. lyrata]	ath:AT1G30515
gnl|UG|Rsa#S42049268	2444	233	2461	108	29.4679	293.759	11.879	3.31741	-1.31073	-4.62815	Up	Down	Down	0	1.08e-14	0	K15920|1|0.0|1429|aly:ARALYDRAFT_496670|beta-D-xylosidase 4 [EC:3.2.1.37]	GO:0005576//extracellular region;GO:0030312//external encapsulating structure	GO:0015926//glucosidase activity	GO:0000272//polysaccharide catabolic process	alpha-L-arabinofuranosidase [Raphanus sativus]	ath:AT5G64570	XYL4
CL12452.Contig3_NAU-YH	705	60	627	4	26.3061	259.453	1.5252	3.302	-4.10832	-7.41033	Up	Down	Down	5.85e-111	1.38e-14	2.17e-189	-	-	-	-	-	None
gi|167500979|gb|FD986062.1|FD986062	827	39	402	9	14.5765	141.808	2.92546	3.28222	-2.31691	-5.59913	Up	Down	Down	1.04e-70	8.22e-06	3.75e-111	K13449|1|1e-38|158|rcu:RCOM_1381930|pathogenesis-related protein 1	GO:0043231//intracellular membrane-bounded organelle	-	-	hypothetical protein ARALYDRAFT_492242 [Arabidopsis lyrata subsp. lyrata]	ath:AT4G25780
CL3728.Contig1_NAU-YH	1643	497	4982	529	93.5004	884.599	86.5516	3.24198	-0.111412	-3.35339	Up	Down	Down	0	0.38454	0	K00924|1|4e-26|117|aly:ARALYDRAFT_489138|[EC:2.7.1.-]	GO:0005618//cell wall;GO:0005576//extracellular region;GO:0009536//plastid	GO:0004175//endopeptidase activity	GO:0019538//protein metabolic process;GO:0000097//sulfur amino acid biosynthetic process	aspartyl protease family protein [Arabidopsis thaliana]	ath:AT3G54400
CL869.Contig3_NAU-YH	1155	72	685	0	19.2684	173.017	0.01	3.16661	-10.912	-14.0786	Up	Down	Down	1.4e-116	3.95e-23	1.7e-216	K13195|1|3e-16|84.3|pop:POPTR_712972|cold-inducible RNA-binding protein;K13201|3|4e-07|54.3|aly:ARALYDRAFT_478823|nucleolysin TIA-1/TIAR	GO:0031981//nuclear lumen;GO:0005911//cell-cell junction;GO:0009536//plastid;GO:0016020//membrane;GO:0042579//microbody;GO:0005576//extracellular region;GO:0030312//external encapsulating structure	GO:0048037//cofactor binding;GO:0032550;GO:0016620//oxidoreductase activity, acting on the aldehyde or oxo group of donors, NAD or NADP as acceptor;GO:0004672//protein kinase activity;GO:0003676//nucleic acid binding;GO:0042802//identical protein binding	GO:0010243//response to organic nitrogen;GO:0006605//protein targeting;GO:0006970//response to osmotic stress;GO:0006631//fatty acid metabolic process;GO:0016129;GO:0010038//response to metal ion;GO:0006464//cellular protein modification process;GO:0009699//phenylpropanoid biosynthetic process;GO:0000398//mRNA splicing, via spliceosome;GO:0009725//response to hormone stimulus;GO:0006952//defense …	glycine-rich RNA-binding protein 8 [Arabidopsis thaliana]	ath:AT4G39260	CCR1
CL2104.Contig4_NAU-YH	617	29	255	30	14.5281	120.569	13.0705	3.05294	-0.152524	-3.20547	Up	Down	Down	7.01e-42	0.775356	6.65e-48	-	GO:0043231//intracellular membrane-bounded organelle	GO:0046914//transition metal ion binding;GO:0001071//nucleic acid binding transcription factor activity	GO:0006625//protein targeting to peroxisome;GO:0009062//fatty acid catabolic process;GO:0006351//transcription, DNA-dependent	hypothetical protein ARALYDRAFT_478784 [Arabidopsis lyrata subsp. lyrata]	ath:AT3G13810	IDD11
gi|332782371|gb|FY443390.1|FY443390	868	79	687	0	28.1321	230.897	0.01	3.03696	-11.458	-14.495	Up	Down	Down	2.87e-112	2.05e-25	3.94e-217	-	-	-	-	hypothetical protein ARALYDRAFT_487770 [Arabidopsis lyrata subsp. lyrata]	ath:AT5G09530
gi|167504379|gb|FD986615.1|FD986615	504	34	287	0	20.8518	166.124	0.01	2.99402	-11.026	-14.02	Up	Down	Down	3.15e-46	7.63e-11	6.11e-90	K02694|1|8e-49|190|aly:ARALYDRAFT_473640|photosystem I subunit III	-	-	-	photosystem I reaction center subunit III [Arabidopsis thaliana]	ath:AT1G31330	PSAF
gi|167439350|gb|FD945454.1|FD945454	912	87	728	75	29.4862	232.872	22.1067	2.98142	-0.415559	-3.39698	Up	Down	Down	8.45e-117	0.167751	1.01e-144	K01757|1|8e-23|105|ath:AT1G74000|strictosidine synthase [EC:4.3.3.2]	GO:0005618//cell wall;GO:0009536//plastid;GO:0005911//cell-cell junction;GO:0016020//membrane	GO:0016843	GO:0009411//response to UV;GO:0016129;GO:0009699//phenylpropanoid biosynthetic process;GO:0034285;GO:0009820//alkaloid metabolic process	strictosidine synthase family protein [Arabidopsis thaliana]	ath:AT3G57010
gi|166101623|gb|FD536349.1|FD536349	648	184	1409	165	87.7683	634.332	68.4488	2.85347	-0.358674	-3.21214	Up	Down	Down	2.93e-216	0.0651274	2.87e-266	-	-	-	-	-	None
Unigene5776_NAU-YH	978	56	398	0	17.6988	118.72	0.01	2.74584	-10.7894	-13.5353	Up	Down	Down	1.32e-58	6.23e-18	3.3e-125	-	-	-	-	-	None
CL12301.Contig1_NAU-YH	385	123	788	47	98.7505	597.098	32.8167	2.59611	-1.58936	-4.18547	Up	Down	Down	4.13e-109	1.53e-10	2e-185	-	-	-	-	-	None
Unigene5946_NAU-YH	835	447	2842	249	165.469	992.929	80.1623	2.58513	-1.04556	-3.63069	Up	Down	Down	0	1.91e-19	0	-	-	-	-	hypothetical protein VITISV_036363 [Vitis vinifera]	None
CL4966.Contig3_NAU-YH	1776	99	629	65	17.2301	103.321	9.83847	2.58413	-0.808423	-3.39255	Up	Down	Down	1.24e-86	0.00206851	7.37e-125	K09553|1|5e-15|81.3|cre:CHLREDRAFT_136069|stress-induced-phosphoprotein 1	-	-	-	tetratricopeptide repeat-containing protein [Arabidopsis lyrata subsp. lyrata]	ath:AT1G78120
CL3051.Contig1_NAU-YH	946	262	1622	98	85.6062	500.196	27.8479	2.54671	-1.62015	-4.16685	Up	Down	Down	7.01e-220	2e-22	0	-	-	-	-	-	None
CL3855.Contig1_NAU-YH	999	189	1114	43	58.4778	325.312	11.5707	2.47586	-2.33741	-4.81327	Up	Down	Down	3.73e-146	2.47e-26	7.5e-287	K00924|1|1e-07|55.8|ath:AT5G22850|[EC:2.7.1.-]	-	-	-	aspartyl protease family protein [Arabidopsis thaliana]	ath:AT5G07030
Unigene23133_NAU-YH	1432	149	876	95	32.1616	178.46	17.8335	2.47219	-0.850747	-3.32294	Up	Down	Down	1.01e-114	4.14e-05	9.26e-171	K13420|1|7e-30|130|sbi:SORBI_06g028760|LRR receptor-like serine/threonine-protein kinase FLS2 [EC:2.7.11.1]	-	GO:0016491//oxidoreductase activity	GO:0007154//cell communication;GO:0008152//metabolic process	leucine-rich repeat family protein [Arabidopsis lyrata subsp. lyrata]	ath:AT2G15320	LRR
gi|156168599|gb|EW728745.1|EW728745	734	45	262	50	18.9501	104.132	18.3118	2.45814	-0.0494309	-2.50757	Up	Down	Down	3.79e-34	0.916463	5.63e-38	K14488|1|5e-06|49.7|ppp:PHYPADRAFT_26859|SAUR family protein	GO:0043231//intracellular membrane-bounded organelle	-	GO:0006694//steroid biosynthetic process;GO:0009725//response to hormone stimulus	SAUR-like auxin-responsive protein family [Arabidopsis thaliana]	ath:AT1G72430
Unigene22809_NAU-YH	1142	68	393	60	18.4051	100.394	14.1235	2.44749	-0.382006	-2.8295	Up	Down	Down	6.89e-51	0.283388	3.75e-65	-	-	-	-	hypothetical protein ARALYDRAFT_334421 [Arabidopsis lyrata subsp. lyrata]	None
CL12614.Contig1_NAU-YH	1618	175	989	183	33.4314	178.319	30.4039	2.41519	-0.136945	-2.55213	Up	Down	Down	4.91e-126	0.566677	1.78e-146	K06694|1|2e-09|62.8|mtr:MTR_5g043640|26S proteasome non-ATPase regulatory subunit 10	GO:0016020//membrane;GO:0009536//plastid	GO:0017111//nucleoside-triphosphatase activity;GO:0032550	GO:0043170	AAA-type ATPase family protein ankyrin repeat family protein [Arabidopsis thaliana]	ath:AT3G24530
CL3860.Contig1_NAU-YH	841	428	2413	184	157.305	837.031	58.8138	2.41172	-1.41934	-3.83106	Up	Down	Down	0	6.05e-30	0	-	-	-	-	-	None
CL13436.Contig1_NAU-YH	396	84	459	82	65.566	338.141	55.6642	2.3666	-0.236199	-2.6028	Up	Down	Down	4.03e-57	0.490257	1.97e-69	-	-	-	-	-	None
Unigene20545_NAU-YH	561	43	230	15	23.6919	119.604	7.18763	2.3358	-1.72081	-4.05661	Up	Down	Down	2.84e-28	0.000154624	1.14e-52	-	-	-	-	-	None
gi|332782770|gb|FY443789.1|FY443789	776	189	1010	209	75.2827	379.7	72.4005	2.33447	-0.0563172	-2.39079	Up	Down	Down	1.33e-123	0.790758	1.54e-138	K14709|1|2e-07|54.7|vcn:VOLCADRAFT_104214|solute carrier family 39 (zinc transporter), member 1/2/3;K01115|4|4e-07|53.5|vcn:VOLCADRAFT_99471|phospholipase D [EC:3.1.4.4]	-	-	-	hypothetical protein ARALYDRAFT_487770 [Arabidopsis lyrata subsp. lyrata]	ath:AT5G09530
CL869.Contig4_NAU-YH	831	140	707	91	52.0741	248.198	29.4373	2.25286	-0.822922	-3.07578	Up	Down	Down	7.36e-83	0.00012863	6.94e-128	K13195|1|1e-34|145|pop:POPTR_712972|cold-inducible RNA-binding protein;K11294|2|2e-13|74.7|zma:100273020|nucleolin;K13044|4|3e-13|73.9|zma:100382653|heterogeneous nuclear ribonucleoprotein A/B/D;K13107|5|4e-13|73.6|vvi:100246760|RNA-binding motif protein, X-linked 2	GO:0031981//nuclear lumen;GO:0005911//cell-cell junction;GO:0009536//plastid;GO:0016020//membrane;GO:0042579//microbody;GO:0005576//extracellular region;GO:0030312//external encapsulating structure	GO:0048037//cofactor binding;GO:0032550;GO:0016620//oxidoreductase activity, acting on the aldehyde or oxo group of donors, NAD or NADP as acceptor;GO:0004672//protein kinase activity;GO:0042802//identical protein binding;GO:0043566//structure-specific DNA binding	GO:0048511//rhythmic process;GO:0003006//developmental process involved in reproduction;GO:0006605//protein targeting;GO:0010118//stomatal movement;GO:0006970//response to osmotic stress;GO:0006631//fatty acid metabolic process;GO:0010038//response to metal ion;GO:0006464//cellular protein modification process;GO:0009699//phenylpropanoid biosynthetic process;GO:0000398//mRNA splicing, via spliceo…	glycine-rich RNA-binding protein 8 [Arabidopsis thaliana]	ath:AT4G39260	CCR1
CL92.Contig2_NAU-YH	973	100	501	0	31.7674	150.212	0.01	2.24138	-11.6333	-13.8747	Up	Down	Down	2.25e-58	2.77e-32	5.79e-158	-	GO:0005911//cell-cell junction;GO:0031225//anchored to membrane;GO:0044464//cell part	GO:0005198//structural molecule activity	GO:0043062//extracellular structure organization;GO:0010101;GO:0009725//response to hormone stimulus;GO:0006006//glucose metabolic process	CIL1 [Brassica carinata]	ath:AT3G07390	AIR12
gi|161571885|gb|EY942597.1|EY942597	809	59	284	17	22.5423	102.412	5.64882	2.18368	-1.99661	-4.18029	Up	Down	Down	4.03e-32	3.83e-07	1.63e-66	-	-	-	-	dehydration-responsive protein-related [Brassica rapa]	ath:AT1G78240	TSD2
Unigene24917_NAU-YH	1658	143	683	36	26.6592	120.176	5.8368	2.17244	-2.19138	-4.36382	Up	Down	Down	1.62e-76	1.58e-18	2.57e-165	-	GO:0043231//intracellular membrane-bounded organelle;GO:0005618//cell wall	-	-	hypothetical protein ARALYDRAFT_913577 [Arabidopsis lyrata subsp. lyrata]	ath:AT4G29310
gi|158640756|gb|EX750647.1|EX750647	764	113	527	72	45.7172	201.232	25.3336	2.13805	-0.851688	-2.98974	Up	Down	Down	6.82e-58	0.000461011	1.43e-92	-	GO:0031090//organelle membrane;GO:0031225//anchored to membrane	-	GO:0006996//organelle organization;GO:0016129;GO:0006637//acyl-CoA metabolic process;GO:0048588//developmental cell growth;GO:0006970//response to osmotic stress;GO:0070838//divalent metal ion transport	hypothetical protein ARALYDRAFT_497154 [Arabidopsis lyrata subsp. lyrata]	ath:AT4G12730	FLA2
CL6377.Contig3_NAU-YH	623	63	290	0	31.257	135.797	0.01	2.1192	-11.61	-13.7292	Up	Down	Down	1.36e-31	3.35e-20	6.85e-91	-	GO:0015630//microtubule cytoskeleton;GO:0030312//external encapsulating structure;GO:0031981//nuclear lumen;GO:0044444//cytoplasmic part;GO:0016020//membrane	GO:0008092//cytoskeletal protein binding	GO:0009933//meristem structural organization;GO:0007010//cytoskeleton organization;GO:0009943//adaxial/abaxial axis specification;GO:0009799//specification of symmetry;GO:0003006//developmental process involved in reproduction	hypothetical protein ARALYDRAFT_478076 [Arabidopsis lyrata subsp. lyrata]	ath:AT3G07540
Unigene21292_NAU-YH	1991	172	782	62	26.7025	114.582	8.37101	2.10133	-1.6735	-3.77483	Up	Down	Down	5.41e-84	1.39e-15	3.4e-170	K14638|1|2e-114|411|ppp:PHYPADRAFT_189464|solute carrier family 15 (peptide/histidine transporter), member 3/4	GO:0016020//membrane	-	GO:0015833//peptide transport	nitrate transporter [Arabidopsis lyrata subsp. lyrata]	ath:AT3G21670
CL8220.Contig1_NAU-YH	1104	98	435	97	27.438	114.948	23.6189	2.06673	-0.216231	-2.28296	Up	Down	Down	8.64e-46	0.490806	2.36e-56	-	GO:0044444//cytoplasmic part	-	GO:0010035//response to inorganic substance;GO:0044699;GO:0009266//response to temperature stimulus;GO:1901700;GO:0006950//response to stress	dehydrin [Brassica napus]	ath:AT1G20450	ERD10
CL5958.Contig2_NAU-YH	1662	162	709	4	30.1286	124.45	0.646973	2.04636	-5.54128	-7.58765	Up	Down	Down	1.32e-73	2.65e-46	2.89e-215	K09338|1|4e-60|230|ath:AT2G22430|homeobox-leucine zipper protein	GO:0043231//intracellular membrane-bounded organelle	GO:0001071//nucleic acid binding transcription factor activity;GO:0044212//transcription regulatory region DNA binding;GO:0042802//identical protein binding	GO:0006351//transcription, DNA-dependent;GO:0009414//response to water deprivation;GO:0009648//photoperiodism;GO:0048506;GO:0009738//abscisic acid mediated signaling pathway;GO:0016049//cell growth	homeobox-leucine zipper protein ATHB-5 [Arabidopsis thaliana]	ath:AT5G65310	HB5
CL2219.Contig1_NAU-YH	1964	315	1349	350	49.5751	200.378	47.9053	2.01504	-0.0494309	-2.06447	Up	Down	Down	3.03e-137	0.751499	5.29e-154	K00924|1|4e-17|88.2|ath:AT5G22850|[EC:2.7.1.-]	GO:0005618//cell wall;GO:0044444//cytoplasmic part	GO:0004175//endopeptidase activity	GO:0019538//protein metabolic process;GO:0005976//polysaccharide metabolic process;GO:0006544//glycine metabolic process	aspartyl protease family protein [Arabidopsis lyrata subsp. lyrata]	ath:AT3G52500
Unigene5925_NAU-YH	929	181	775	76	60.2224	243.37	21.9915	2.01478	-1.45335	-3.46813	Up	Down	Down	7.72e-79	2.03e-13	5.42e-157	-	-	-	-	hypothetical protein ARALYDRAFT_914862 [Arabidopsis lyrata subsp. lyrata]	ath:AT4G18280
gi|158941560|gb|EX903892.1|EX903892	775	71	300	65	28.3173	112.928	22.546	1.99564	-0.328813	-2.32446	Up	Down	Down	2.9e-30	0.353941	9.85e-40	-	-	-	-	glycine-rich protein [Arabidopsis thaliana]	ath:AT1G55990
Unigene8580_NAU-YH	603	289	1195	213	148.141	578.137	94.9554	1.96444	-0.64165	-2.60609	Up	Down	Down	1.43e-117	6.46e-06	2.44e-181	-	GO:0043231//intracellular membrane-bounded organelle	-	-	hypothetical protein ARALYDRAFT_487770 [Arabidopsis lyrata subsp. lyrata]	ath:AT5G09530
Unigene18677_NAU-YH	1046	161	658	74	47.5761	183.516	19.0177	1.9476	-1.3229	-3.2705	Up	Down	Down	4.9e-64	1.76e-10	2.77e-126	K14496|1|3e-94|343|ath:AT2G38310|abscisic acid receptor PYR/PYL family	-	GO:0005488//binding	GO:0009755//hormone-mediated signaling pathway	abscisic acid receptor PYL4 [Arabidopsis thaliana]	ath:AT2G38310	PYL4
Unigene2240_NAU-YH	943	88	359	83	28.8447	111.061	23.6605	1.94498	-0.285826	-2.23081	Up	Down	Down	5.85e-35	0.372788	3.4e-45	-	-	-	-	hypothetical protein [Arabidopsis thaliana]	ath:AT2G17300
Unigene25026_NAU-YH	1413	276	1114	265	60.3756	229.998	50.4151	1.92958	-0.26011	-2.18969	Up	Down	Down	4.96e-107	0.103914	3.95e-137	-	GO:0031981//nuclear lumen;GO:0009536//plastid	-	GO:0006351//transcription, DNA-dependent	DNA-binding storekeeper protein-related transcriptional regulator [Arabidopsis thaliana]	ath:AT1G61730
CL8467.Contig2_NAU-YH	557	94	374	16	52.1636	195.883	7.72186	1.90888	-2.75602	-4.6649	Up	Down	Down	1.61e-35	5.51e-16	3.52e-94	K14503|1|1e-22|104|vvi:100249673|brassinosteroid resistant 1/2	-	-	GO:0006351//transcription, DNA-dependent	hypothetical protein ARALYDRAFT_912686 [Arabidopsis lyrata subsp. lyrata]	ath:AT4G36780	BEH2
Unigene22878_NAU-YH	1605	155	607	160	29.8505	110.33	26.798	1.886	-0.15563	-2.04163	Up	Down	Down	1.32e-56	0.528618	3.17e-68	K01728|1|0.0|753|ath:AT4G24780|pectate lyase [EC:4.2.2.2]	-	GO:0016837	GO:0048646//anatomical structure formation involved in morphogenesis	RecName: Full=Probable pectate lyase 18; AltName: Full=Pectate lyase A10; Flags: Precursor	ath:AT4G24780
Unigene18280_NAU-YH	1554	269	1025	201	53.5052	192.421	34.7698	1.84652	-0.621845	-2.46836	Up	Down	Down	8.09e-93	2.68e-05	4.92e-146	K00924|1|6e-35|147|aly:ARALYDRAFT_489138|[EC:2.7.1.-]	-	GO:0004175//endopeptidase activity	GO:0019538//protein metabolic process	aspartyl protease family protein [Arabidopsis thaliana]	ath:AT3G25700
Unigene16746_NAU-YH	1012	1637	6099	1245	499.992	1758.16	330.709	1.81409	-0.596343	-2.41043	Up	Down	Down	0	8.66e-27	0	-	GO:0005618//cell wall;GO:0043231//intracellular membrane-bounded organelle;GO:0005911//cell-cell junction;GO:0031225//anchored to membrane	-	GO:0010053//root epidermal cell differentiation;GO:0016129	fasciclin-like arabinogalactan protein 13 [Arabidopsis thaliana]	ath:AT5G44130	FLA13
gi|161573069|gb|EY945256.1|EY945256	862	90	320	80	32.2723	108.299	24.9482	1.74665	-0.371359	-2.11801	Up	Down	Down	5.38e-27	0.216791	9.6e-38	-	-	-	-	hypothetical protein ARALYDRAFT_482567 [Arabidopsis lyrata subsp. lyrata]	ath:AT2G35960	NHL12
Unigene20897_NAU-YH	1223	326	1155	239	82.3922	275.509	52.5326	1.74152	-0.649295	-2.39082	Up	Down	Down	1.79e-96	1.05e-06	1.81e-158	K14489|1|3e-14|78.2|vvi:100263145|arabidopsis histidine kinase 2/3/4 (cytokinin receptor) [EC:2.7.13.3]	GO:0005911//cell-cell junction;GO:0031224//intrinsic to membrane	GO:0030247//polysaccharide binding	-	plasmodesmata callose-binding protein 4 [Arabidopsis thaliana]	ath:AT1G69295	PDCB4
Unigene22716_NAU-YH	1511	164	559	100	33.5486	107.926	17.7907	1.68572	-0.91513	-2.60085	Up	Down	Down	1.12e-44	3.55e-06	1.62e-84	K00924|1|3e-103|374|ath:AT1G30270|[EC:2.7.1.-];K07198|3|2e-53|208|pop:POPTR_818055|5'-AMP-activated protein kinase, catalytic alpha subunit [EC:2.7.11.11]	GO:0044424//intracellular part;GO:0016020//membrane	GO:0032550;GO:0004672//protein kinase activity	GO:0006464//cellular protein modification process;GO:0006796//phosphate-containing compound metabolic process;GO:0009738//abscisic acid mediated signaling pathway	CBL-interacting serinethreonine-protein kinase 15 [Arabidopsis thaliana]	ath:AT5G01810	CIPK15
CL9843.Contig2_NAU-YH	865	92	313	4	32.8751	105.562	1.24309	1.68303	-4.725	-6.40802	Up	Down	Down	4.34e-25	2.74e-24	9.67e-91	K00799|1|1e-98|357|aly:ARALYDRAFT_481860|glutathione S-transferase [EC:2.5.1.18]	GO:0005911//cell-cell junction;GO:0044444//cytoplasmic part;GO:0016020//membrane	GO:0072341//modified amino acid binding;GO:0016765//transferase activity, transferring alkyl or aryl (other than methyl) groups	GO:0009725//response to hormone stimulus;GO:0009072//aromatic amino acid family metabolic process;GO:0032787//monocarboxylic acid metabolic process;GO:0006950//response to stress;GO:0009404//toxin metabolic process;GO:0014070//response to organic cyclic compound	glutathione-s-transferase 5 [Arabidopsis lyrata subsp. lyrata]	ath:AT2G29450	GSTU5
gi|161554534|gb|EY926508.1|EY926508	808	90	287	40	34.4291	103.622	13.3078	1.58963	-1.37136	-2.96098	Up	Down	Down	2.94e-21	1.84e-06	7.37e-50	K13420|1|3e-37|153|rcu:RCOM_0633880|LRR receptor-like serine/threonine-protein kinase FLS2 [EC:2.7.11.1]	GO:0009536//plastid	GO:0036094//small molecule binding;GO:0016628//oxidoreductase activity, acting on the CH-CH group of donors, NAD or NADP as acceptor;GO:0016772//transferase activity, transferring phosphorus-containing groups	GO:0006796//phosphate-containing compound metabolic process;GO:0042221//response to chemical stimulus;GO:0044710;GO:0007154//cell communication;GO:0009411//response to UV	DNA-damage-repair/toleration protein DRT100 [Arabidopsis thaliana]	ath:AT3G12610	DRT100
Unigene8482_NAU-YH	598	75	236	5	38.7664	115.131	2.24764	1.5704	-4.10832	-5.67872	Up	Down	Down	2.96e-17	3.61e-18	2.07e-65	-	-	GO:0005488//binding	-	proline-rich family protein [Arabidopsis thaliana]	ath:AT5G12880
Unigene20711_NAU-YH	2511	344	1068	29	42.3454	124.081	3.10462	1.551	-3.76972	-5.32072	Up	Down	Down	1.31e-75	1.16e-77	9.58e-290	K03255|1|3e-06|52.8|mtr:MTR_3g027610|protein TIF31;K15296|2|3e-06|52.8|bdi:100843580|alpha-soluble NSF attachment protein;K09667|5|6e-06|51.6|rcu:RCOM_0611050|polypeptide N-acetylglucosaminyltransferase [EC:2.4.1.-]	-	-	-	tetratricopeptide repeat domain-containing protein [Arabidopsis thaliana]	ath:AT3G27960
CL6187.Contig2_NAU-YH	821	154	469	54	57.9792	166.652	17.681	1.52323	-1.71333	-3.23656	Up	Down	Down	1.82e-32	1.82e-14	4.76e-89	-	GO:0031224//intrinsic to membrane	GO:0005488//binding	GO:0010035//response to inorganic substance;GO:0010876//lipid localization;GO:0015698//inorganic anion transport	bifunctional inhibitorlipid-transfer proteinseed storage 2S albumin-like protein [Arabidopsis thaliana]	ath:AT3G22600
CL3146.Contig2_NAU-YH	554	220	665	84	122.746	350.181	40.7593	1.51242	-1.59048	-3.1029	Up	Down	Down	1.92e-45	2.02e-18	2.52e-121	-	-	-	-	unknown [Brassica rapa]	None
Unigene8311_NAU-YH	234	299	889	206	394.957	1108.32	236.651	1.48861	-0.738935	-2.22754	Up	Down	Down	2.79e-59	1.29e-07	8.68e-112	-	-	GO:0005198//structural molecule activity	GO:0006511//ubiquitin-dependent protein catabolic process;GO:0009725//response to hormone stimulus;GO:0071555//cell wall organization;GO:0048588//developmental cell growth;GO:0043623//cellular protein complex assembly;GO:0014070//response to organic cyclic compound;GO:0046942//carboxylic acid transport;GO:0035966//response to topologically incorrect protein	extensin 3 [Arabidopsis thaliana]	ath:AT1G21310	EXT3
CL13669.Contig2_NAU-YH	1167	225	662	52	59.5945	165.488	11.9781	1.47348	-2.31478	-3.78825	Up	Down	Down	1.55e-43	6.38e-31	2.07e-144	-	-	-	GO:0006952//defense response;GO:0006575//cellular modified amino acid metabolic process;GO:0071310//cellular response to organic substance;GO:0006595//polyamine metabolic process;GO:0007165//signal transduction;GO:0006725//cellular aromatic compound metabolic process	hypothetical protein [Arabidopsis thaliana]	ath:AT1G68440
gi|167483916|gb|FD967923.1|FD967923	198	57	166	513	88.9825	244.581	31.2262	1.45872	-1.51076	-2.96948	Up	Down	Down	4.49e-11	6.38e-05	6.29e-29	-	-	-	-	-	None
Unigene27746_NAU-YH	1353	223	649	154	50.945	139.935	30.5971	1.45775	-0.735547	-2.19329	Up	Down	Down	5.19e-42	8.07e-06	5.3e-80	-	GO:0016020//membrane;GO:0044444//cytoplasmic part	-	GO:0050896//response to stimulus	heat shock protein binding protein [Arabidopsis lyrata subsp. lyrata]	ath:AT1G21660
CL11348.Contig1_NAU-YH	547	178	502	67	100.584	267.73	32.9264	1.41238	-1.61108	-3.02346	Up	Down	Down	4.46e-31	2.79e-15	3.5e-89	-	-	-	-	-	None
CL4206.Contig2_NAU-YH	1773	483	1346	293	84.2041	221.471	44.4238	1.39516	-0.922556	-2.31771	Up	Down	Down	2.12e-81	3.96e-17	6.8e-178	K00924|1|1e-23|110|ath:AT5G22850|[EC:2.7.1.-]	GO:0005911//cell-cell junction;GO:0005618//cell wall	GO:0004175//endopeptidase activity	GO:0019538//protein metabolic process;GO:0071555//cell wall organization;GO:0009628//response to abiotic stimulus	aspartyl protease [Arabidopsis thaliana]	ath:AT3G61820
CL2351.Contig2_NAU-YH	940	420	1161	163	138.107	360.317	46.6141	1.38348	-1.56695	-2.95043	Up	Down	Down	2.45e-69	5.25e-34	1.52e-201	-	GO:0043231//intracellular membrane-bounded organelle	-	-	hypothetical protein ARALYDRAFT_490769 [Arabidopsis lyrata subsp. lyrata]	ath:AT4G39840
gi|156167732|gb|EW727878.1|EW727878	912	129	356	49	43.721	113.877	14.443	1.38108	-1.59795	-2.97903	Up	Down	Down	2.06e-21	4.14e-11	2.92e-62	K08235|1|4e-112|402|aly:ARALYDRAFT_471290|xyloglucan:xyloglucosyl transferase [EC:2.4.1.207]	GO:0043231//intracellular membrane-bounded organelle;GO:0005576//extracellular region;GO:0030312//external encapsulating structure	GO:0016798//hydrolase activity, acting on glycosyl bonds;GO:0016758//transferase activity, transferring hexosyl groups	GO:0044042//glucan metabolic process	xyloglucan:xyloglucosyl transferase [Arabidopsis thaliana]	ath:AT1G11545	XTH8
gi|167501408|gb|FD984991.1|FD984991	803	690	1878	498	265.6	682.277	166.714	1.3611	-0.671885	-2.03299	Up	Down	Down	2.41e-109	3.08e-14	3.34e-210	-	GO:0031224//intrinsic to membrane	GO:0004674//protein serine/threonine kinase activity;GO:0032550	GO:0006464//cellular protein modification process	hypothetical protein ARALYDRAFT_475074 [Arabidopsis lyrata subsp. lyrata]	ath:AT1G62790
gi|161572925|gb|EY944340.1|EY944340	661	97	248	66	45.3592	109.454	26.8411	1.27086	-0.756953	-2.02781	Up	Down	Down	2.59e-13	0.00442963	1.1e-27	-	-	-	-	hypothetical protein [Arabidopsis thaliana]	ath:AT4G24275
Unigene18339_NAU-YH	1018	168	429	109	51.0101	122.939	28.783	1.26909	-0.825567	-2.09466	Up	Down	Down	1.22e-22	2.04e-05	7.45e-50	K01897|1|4e-179|625|aly:ARALYDRAFT_474909|long-chain acyl-CoA synthetase [EC:6.2.1.3]	GO:0043231//intracellular membrane-bounded organelle;GO:0044444//cytoplasmic part;GO:0016020//membrane	GO:0015645//fatty acid ligase activity	GO:0006952//defense response;GO:0006631//fatty acid metabolic process;GO:0009699//phenylpropanoid biosynthetic process	hypothetical protein ARALYDRAFT_474909 [Arabidopsis lyrata subsp. lyrata]	ath:AT1G64400	LACS3
CL14026.Contig1_NAU-YH	2954	1317	3313	273	137.807	327.184	24.8433	1.24745	-2.47172	-3.71917	Up	Down	Down	1.44e-168	6.58e-195	0	K00360|1|0.0|1017|ppp:PHYPADRAFT_184973|nitrate reductase (NADH) [EC:1.7.1.1];K00387|4|5e-109|394|olu:OSTLU_3554|sulfite oxidase [EC:1.8.3.1]	GO:0043231//intracellular membrane-bounded organelle;GO:0044444//cytoplasmic part;GO:0016020//membrane	GO:0046906//tetrapyrrole binding;GO:0046914//transition metal ion binding;GO:0008940//nitrate reductase activity;GO:0000166//nucleotide binding;GO:0050662//coenzyme binding	GO:0009314//response to radiation;GO:0016042//lipid catabolic process;GO:0048588//developmental cell growth;GO:0042126//nitrate metabolic process;GO:0009608//response to symbiont;GO:0044271//cellular nitrogen compound biosynthetic process	RecName: Full=Nitrate reductase [NADH], clone PBNBR1405; Short=NR	ath:AT1G77760	NIA1
CL10463.Contig1_NAU-YH	1056	224	541	513	65.566	149.456	28.7655	1.1887	-1.18861	-2.37731	Up	Down	Down	1.02e-25	3.23e-12	1.22e-73	-	GO:0043231//intracellular membrane-bounded organelle	-	-	hypothetical protein [Arabidopsis thaliana]	ath:AT3G07470
Unigene13672_NAU-YH	1797	322	758	39	55.3863	123.056	5.8341	1.15171	-3.24695	-4.39866	Up	Down	Down	3.81e-34	9.25e-64	1.73e-184	K13263|1|9e-91|332|gmx:100101902|isoflavone 7-O-glucosyltransferase [EC:2.4.1.170];K08237|2|3e-70|264|aly:ARALYDRAFT_490463|hydroquinone glucosyltransferase [EC:2.4.1.218]	GO:0044444//cytoplasmic part	GO:0035251//UDP-glucosyltransferase activity	-	hypothetical protein ARALYDRAFT_479115 [Arabidopsis lyrata subsp. lyrata]	ath:AT3G16520	UGT88A1
gi|332778349|gb|FY442756.1|FY442756	880	152	351	27	53.3895	116.36	8.2478	1.12397	-2.69447	-3.81845	Up	Down	Down	1.93e-15	5.44e-25	6.71e-77	K00430|1|1e-145|513|aly:ARALYDRAFT_323056|peroxidase [EC:1.11.1.7]	GO:0005618//cell wall;GO:0043231//intracellular membrane-bounded organelle;GO:0044444//cytoplasmic part;GO:0031090//organelle membrane;GO:0005576//extracellular region	GO:0043169//cation binding;GO:0046906//tetrapyrrole binding;GO:0016209//antioxidant activity;GO:0003824//catalytic activity	GO:0009314//response to radiation;GO:0044710;GO:0052166;GO:0000902//cell morphogenesis;GO:0042743//hydrogen peroxide metabolic process	peroxidase 32 [Eutrema halophilum]	ath:AT3G32980
CL10350.Contig1_NAU-YH	932	231	520	121	76.611	162.768	34.9001	1.08719	-1.13432	-2.22151	Up	Down	Down	1.72e-21	1.02e-11	3.96e-65	-	GO:0043231//intracellular membrane-bounded organelle;GO:0016020//membrane	-	GO:0015698//inorganic anion transport;GO:0010035//response to inorganic substance;GO:0046942//carboxylic acid transport;GO:0009404//toxin metabolic process;GO:0014070//response to organic cyclic compound	hypothetical protein [Arabidopsis thaliana]	ath:AT3G06390
CL8265.Contig2_NAU-YH	1006	600	1338	293	184.352	388.006	78.2937	1.07362	-1.2355	-2.30911	Up	Down	Down	1.14e-53	8.42e-34	4.85e-176	-	-	-	-	-	None
CL11631.Contig4_NAU-YH	974	159	348	59	50.4583	104.232	16.2836	1.04663	-1.63167	-2.67831	Up	Down	Down	1.06e-13	5.95e-14	2.45e-54	K14496|1|3e-96|349|aly:ARALYDRAFT_914915|abscisic acid receptor PYR/PYL family	-	GO:0019840//isoprenoid binding;GO:0042802//identical protein binding	GO:0006568//tryptophan metabolic process;GO:0009755//hormone-mediated signaling pathway;GO:0019758;GO:0009845//seed germination;GO:0009683;GO:0043666//regulation of phosphoprotein phosphatase activity	Streptomyces cyclasedehydrase family protein [Brassica oleracea]	ath:AT4G17870	PYR1
gi|158947011|gb|EX909167.1|EX909167	775	134	292	74	53.4439	109.916	25.6677	1.04031	-1.05807	-2.09838	Up	Down	Down	1.8e-11	2.14e-06	4.88e-34	K13430|1|1e-20|98.6|zma:100283091|serine/threonine-protein kinase PBS1 [EC:2.7.11.1]	GO:0031224//intrinsic to membrane;GO:0043231//intracellular membrane-bounded organelle;GO:0044444//cytoplasmic part	GO:0032550;GO:0004674//protein serine/threonine kinase activity	GO:0007167//enzyme linked receptor protein signaling pathway;GO:0006464//cellular protein modification process;GO:0006796//phosphate-containing compound metabolic process	STRUBBELIG-receptor family 7 protein [Arabidopsis thaliana]	ath:AT3G14350	SRF7
Unigene6124_NAU-YH	683	110	239	30	49.7814	102.084	11.8075	1.03608	-2.0759	-3.11198	Up	Down	Down	1.98e-09	1.91e-13	1.25e-43	-	GO:0031224//intrinsic to membrane	GO:0005488//binding	GO:0015698//inorganic anion transport;GO:0010876//lipid localization;GO:0010035//response to inorganic substance;GO:0000041//transition metal ion transport;GO:0009267//cellular response to starvation	hypothetical protein ARALYDRAFT_322456 [Arabidopsis lyrata subsp. lyrata]	ath:AT2G48130
CL2512.Contig1_NAU-YH	841	350	759	179	128.637	263.285	57.2156	1.03332	-1.16883	-2.20215	Up	Down	Down	9.5e-29	2.8e-18	4.8e-94	K07375|1|1e-162|570|gmx:100788253|tubulin beta	GO:0043231//intracellular membrane-bounded organelle;GO:0015630//microtubule cytoskeleton;GO:0043234//protein complex	GO:0005198//structural molecule activity;GO:0032550;GO:0017111//nucleoside-triphosphatase activity	GO:0051603//proteolysis involved in cellular protein catabolic process;GO:0006928//cellular component movement;GO:0006996//organelle organization;GO:0006970//response to osmotic stress;GO:0006006//glucose metabolic process;GO:0043623//cellular protein complex assembly;GO:0009154//purine ribonucleotide catabolic process	PREDICTED: tubulin beta-1 chain-like isoform 1 [Fragaria vesca subsp. vesca]	ath:AT5G23860	TUB8
Unigene8830_NAU-YH	815	166	353	75	62.9572	126.356	24.7378	1.00506	-1.34765	-2.35271	Up	Down	Down	4.95e-13	4.41e-11	1.95e-47	K01897|1|7e-110|394|aly:ARALYDRAFT_474909|long-chain acyl-CoA synthetase [EC:6.2.1.3]	GO:0043231//intracellular membrane-bounded organelle;GO:0044444//cytoplasmic part;GO:0016020//membrane	GO:0015645//fatty acid ligase activity	GO:0006952//defense response;GO:0006631//fatty acid metabolic process;GO:0009699//phenylpropanoid biosynthetic process	hypothetical protein ARALYDRAFT_474909 [Arabidopsis lyrata subsp. lyrata]	ath:AT1G64400	LACS3
Unigene18958_NAU-YH	1098	616	1285	266	173.41	341.414	65.1233	0.977338	-1.41294	-2.39028	Up	Down	Down	3.22e-44	1.25e-42	2.68e-176	-	-	-	-	protein exordium like 5 [Arabidopsis thaliana]	ath:AT2G17230	EXL5
gi|156178301|gb|EW738447.1|EW738447	831	173	355	30	64.3487	124.626	9.70459	0.953619	-2.72917	-3.68279	Up	Down	Down	4.66e-12	8.49e-29	1.56e-75	-	-	-	-	unknown [Brassica rapa]	None
Unigene23628_NAU-YH	804	350	714	17	134.557	259.073	5.68395	0.945141	-4.56518	-5.51032	Up	Down	Down	2.1e-23	1.3e-90	1.43e-196	-	-	-	-	-	None
gi|166115015|gb|FD546225.1|FD546225	813	233	462	88	88.585	165.78	29.0971	0.904135	-1.60619	-2.51032	Up	Down	Down	2.98e-14	9.48e-20	4.82e-67	-	-	-	-	LORELEI-LIKE-GPI-ANCHORED PROTEIN 1 [Arabidopsis thaliana]	ath:AT5G56170	LLG1
CL399.Contig1_NAU-YH	904	297	583	29	101.551	188.14	8.62356	0.889605	-3.55777	-4.44738	Up	Down	Down	2.2e-17	7.04e-64	8.65e-143	-	GO:0005622//intracellular	-	GO:0006351//transcription, DNA-dependent	zinc finger-related protein [Arabidopsis thaliana]	ath:AT1G68360
Unigene8866_NAU-YH	1260	1300	2454	1	318.91	568.178	0.213347	0.833196	-10.5457	-11.3789	Up	Down	Down	1.92e-64	0	0	-	-	-	-	-	None
CL892.Contig2_NAU-YH	668	138	259	40	63.8554	113.111	16.0968	0.824856	-1.98803	-2.81289	Up	Down	Down	3.81e-07	7.68e-16	1.19e-42	-	-	GO:0031406//carboxylic acid binding	GO:0009725//response to hormone stimulus	ACT domain repeat 8 protein [Arabidopsis thaliana]	ath:AT1G12420	ACR8
Unigene19870_NAU-YH	1096	696	1283	264	196.288	341.505	64.7516	0.798934	-1.59998	-2.39892	Up	Down	Down	1.65e-31	6.92e-58	8.73e-177	-	-	-	-	-	None
gi|332780261|gb|FY440237.1|FY440237	421	2208	4029	817	1621.11	2791.87	521.672	0.784254	-1.63577	-2.42002	Up	Down	Down	2.79e-95	2.62e-189	0	-	-	-	-	extensin 3 [Arabidopsis thaliana]	ath:AT1G21310	EXT3
Unigene25705_NAU-YH	763	259	428	0	104.923	163.644	0.01	0.641231	-13.357	-13.9983	Up	Down	Down	1.42e-07	1.07e-84	9.78e-135	-	GO:0031090//organelle membrane;GO:0043231//intracellular membrane-bounded organelle	GO:0004527//exonuclease activity;GO:0097159//organic cyclic compound binding	GO:0006725//cellular aromatic compound metabolic process	DnaQ-like exonuclease domain-containing protein [Arabidopsis thaliana]	ath:AT5G06450
Unigene18759_NAU-YH	1007	605	975	164	185.704	282.459	43.7796	0.605039	-2.08467	-2.68971	Up	Down	Down	6.07e-15	1.65e-72	3.08e-153	-	GO:0043231//intracellular membrane-bounded organelle	GO:0001948//glycoprotein binding	GO:0051707//response to other organism;GO:0009626//plant-type hypersensitive response;GO:0009813//flavonoid biosynthetic process;GO:0009746;GO:0006605//protein targeting;GO:0006970//response to osmotic stress;GO:0042044//fluid transport	protein PHLOEM protein 2-LIKE A1 [Arabidopsis thaliana]	ath:AT4G19840	PP2-A1
Unigene21238_NAU-YH	1096	258	406	2	72.7619	108.068	0.490542	0.570681	-7.21266	-7.78334	Up	Down	Down	5.47e-06	2.12e-80	2.04e-123	-	-	-	-	80A08_24 [Brassica rapa subsp. pekinensis]	None
CL5299.Contig1_NAU-YH	1299	353	542	99	83.9963	121.722	20.4872	0.535197	-2.0356	-2.5708	Up	Down	Down	5.41e-07	4.26e-41	7.17e-81	K00430|1|4e-166|582|ath:AT4G37520|peroxidase [EC:1.11.1.7]	GO:0044424//intracellular part	GO:0046906//tetrapyrrole binding;GO:0016209//antioxidant activity;GO:0043169//cation binding;GO:0003824//catalytic activity	GO:0006970//response to osmotic stress;GO:0010053//root epidermal cell differentiation;GO:0044710	peroxidase 50 [Arabidopsis thaliana]	ath:AT4G37520
gi|161570779|gb|EY942074.1|EY942074	697	213	326	13	94.4586	136.447	5.01381	0.53059	-4.2357	-4.76629	Up	Down	Down	0.00020094	1.89e-52	4.32e-83	K07375|1|3e-74|176|aly:ARALYDRAFT_489245|tubulin beta	-	-	-	beta-8 tubulin [Arabidopsis thaliana]	ath:AT5G23860	TUB8
CL1872.Contig1_NAU-YH	968	452	688	63	144.33	207.345	17.4953	0.522658	-3.04433	-3.56699	Up	Down	Down	2.29e-08	4.86e-84	8.79e-143	K00588|1|5e-138|488|aly:ARALYDRAFT_912997|caffeoyl-CoA O-methyltransferase [EC:2.1.1.104]	GO:0044444//cytoplasmic part	GO:0043169//cation binding;GO:0008171//O-methyltransferase activity	GO:0006575//cellular modified amino acid metabolic process;GO:0000097//sulfur amino acid biosynthetic process;GO:0010038//response to metal ion;GO:0009813//flavonoid biosynthetic process;GO:0006595//polyamine metabolic process;GO:0006950//response to stress	caffeoyl-CoA 3-O-methyltransferase [Brassica rapa subsp. pekinensis]	ath:AT4G34050	CCoAOMT1
gi|167446122|gb|FD952076.1|FD952076	812	252	372	53	95.9267	133.65	17.546	0.478451	-2.45079	-2.92924	Up	Down	Down	0.000320856	5.04e-37	5.97e-64	K01251|1|2e-96|350|ath:AT3G23810|adenosylhomocysteinase [EC:3.3.1.1]	GO:0016020//membrane;GO:0043231//intracellular membrane-bounded organelle;GO:0044444//cytoplasmic part	GO:0046914//transition metal ion binding;GO:0016802;GO:0036094//small molecule binding	GO:0006342//chromatin silencing;GO:0006996//organelle organization;GO:0006970//response to osmotic stress;GO:0070838//divalent metal ion transport;GO:0010608//posttranscriptional regulation of gene expression;GO:0000097//sulfur amino acid biosynthetic process	AT3g23810/MYM9_15 [Arabidopsis thaliana]	ath:AT3G23810	SAHH2
CL3292.Contig2_NAU-YH	1116	434	604	17	120.204	157.889	4.09489	0.393425	-4.87552	-5.26895	Up	Down	Down	0.000110716	7.28e-117	8.65e-163	K08235|1|4e-139|492|ath:AT4G30270|xyloglucan:xyloglucosyl transferase [EC:2.4.1.207];K14504|3|7e-125|445|aly:ARALYDRAFT_918931|xyloglucan:xyloglucosyl transferase TCH4 [EC:2.4.1.207]	GO:0005618//cell wall;GO:0009536//plastid;GO:0005576//extracellular region;GO:0016020//membrane	GO:0016798//hydrolase activity, acting on glycosyl bonds;GO:0016758//transferase activity, transferring hexosyl groups	GO:0044042//glucan metabolic process;GO:0010243//response to organic nitrogen;GO:0044767;GO:0010476//gibberellin mediated signaling pathway;GO:0009827//plant-type cell wall modification;GO:0006950//response to stress;GO:0009605//response to external stimulus	xyloglucosyl transferase 2, partial [Brassica juncea]	ath:AT4G30270	XTH24
CL1010.Contig1_NAU-YH	221	79	108	513	110.492	142.565	0.01	0.367679	-13.4317	-13.7993	Up	Down	Down	0.215425	2.06e-25	2.8e-33	-	-	-	-	-	None
CL1126.Contig1_NAU-YH	1020	2078	2799	719	629.709	800.54	189.49	0.346288	-1.73257	-2.07885	Up	Down	Down	2.24e-15	1.84e-193	0	K00799|1|3e-98|356|ath:AT2G02930|glutathione S-transferase [EC:2.5.1.18]	GO:0009532//plastid stroma;GO:0005911//cell-cell junction;GO:0005576//extracellular region;GO:0016020//membrane	GO:0097159//organic cyclic compound binding;GO:0016765//transferase activity, transferring alkyl or aryl (other than methyl) groups;GO:0072341//modified amino acid binding	GO:0006952//defense response;GO:0010038//response to metal ion;GO:0006970//response to osmotic stress;GO:0009404//toxin metabolic process	glutathione S-transferase 2 [Brassica juncea]	ath:AT2G02930	GSTF3
Unigene16889_NAU-YH	351	122	163	513	107.435	135.476	0.01	0.334563	-13.3912	-13.7257	Up	Down	Down	0.151778	1.7e-39	1.23e-50	-	-	-	-	-	None
gi|158667927|gb|EX777818.1|EX777818	302	175	230	0	179.113	222.178	0.01	0.310851	-14.1286	-14.4394	Up	Down	Down	0.0998657	5.92e-57	7.34e-72	K03232|1|2e-09|58.9|aly:ARALYDRAFT_488844|elongation factor 1-beta	-	-	-	Elongation factor 1-beta 2 [Arabidopsis thaliana]	ath:AT5G19510
Unigene987_NAU-YH	209	144	188	513	212.966	262.417	14.1483	0.301236	-3.91193	-4.21316	Up	Down	Down	0.162334	1.74e-33	3.45e-44	-	-	-	-	-	None
gi|166118938|gb|FD550568.1|FD550568	653	231	299	78	109.344	133.579	32.1099	0.288825	-1.76778	-2.05661	Up	Down	Down	0.076012	2.18e-22	5.86e-34	-	-	-	-	-	None
gi|167450346|gb|FD955791.1|FD955791	599	302	382	92	155.839	186.045	41.2875	0.255596	-1.91628	-2.17187	Up	Down	Down	0.0733788	1.65e-32	1.69e-46	-	-	-	-	RecName: Full=Metallothionein-like protein type 2, MT2-28	ath:AT5G02380	MT2B
Unigene6725_NAU-YH	883	278	351	7	97.3148	115.965	2.13105	0.252958	-5.51302	-5.76598	Up	Down	Down	0.0930794	1.77e-79	3.9e-98	-	-	-	-	-	None
Unigene30615_NAU-YH	734	240	300	1	101.067	119.236	0.366236	0.2385	-8.10832	-8.34682	Up	Down	Down	0.156093	2.55e-76	6.99e-92	-	-	-	-	-	None
gi|166110845|gb|FD541120.1|FD541120	791	776	964	84	303.236	355.534	28.547	0.229548	-3.40903	-3.63858	Up	Down	Down	0.00522542	7.84e-161	1.24e-203	-	-	-	-	disease resistance response protein [Brassica rapa]	ath:AT4G23690
Unigene21870_NAU-YH	725	325	396	66	138.561	159.345	24.4716	0.201633	-2.50134	-2.70297	Up	Down	Down	0.168408	7.87e-49	1.77e-62	-	-	-	-	-	None
gi|158648338|gb|EX758229.1|EX758229	602	329	382	53	168.925	185.117	23.6666	0.132057	-2.83546	-2.96751	Up	Down	Down	0.438708	7.61e-57	1.52e-66	-	-	-	-	-	None
Unigene5904_NAU-YH	722	323	374	0	138.28	151.118	0.01	0.128076	-13.7553	-13.8834	Up	Down	Down	0.446848	7.27e-106	1.41e-117	-	-	-	-	-	None
CL5093.Contig1_NAU-YH	1526	466	533	513	94.3901	101.895	46.3296	0.110377	-1.0267	-1.13708	Up	Down	Down	0.4459	1.15e-19	2.1e-25	-	GO:0043231//intracellular membrane-bounded organelle;GO:0016020//membrane	-	GO:0048588//developmental cell growth	hypothetical protein ARALYDRAFT_473858 [Arabidopsis lyrata subsp. lyrata]	ath:AT1G45688
CL7164.Contig2_NAU-YH	858	1855	2113	469	668.269	718.444	146.941	0.104445	-2.18519	-2.28964	Up	Down	Down	0.0783064	4.67e-236	2.71e-275	-	-	-	-	-	None
CL2250.Contig1_NAU-YH	1495	1720	1951	154	355.617	380.712	27.6909	0.0983771	-3.68284	-3.78122	Up	Down	Down	0.118761	0	0	-	-	-	-	-	None
Unigene16936_NAU-YH	1408	438	493	45	96.1538	102.147	8.59146	0.0872287	-3.48437	-3.5716	Up	Down	Down	0.573296	1.59e-92	2.56e-102	-	GO:0005618//cell wall;GO:0043231//intracellular membrane-bounded organelle;GO:0044444//cytoplasmic part	-	GO:0006694//steroid biosynthetic process;GO:0009725//response to hormone stimulus	hypothetical protein ARALYDRAFT_489716 [Arabidopsis lyrata subsp. lyrata]	ath:AT4G08950	EXO
CL6483.Contig1_NAU-YH	1629	2116	2353	59	401.504	421.387	9.73617	0.0697336	-5.36591	-5.43565	Up	Down	Down	0.261387	0	0	-	GO:0005618//cell wall;GO:0031090//organelle membrane;GO:0043231//intracellular membrane-bounded organelle;GO:0044444//cytoplasmic part;GO:0005576//extracellular region	GO:0005488//binding	-	hypothetical protein ARALYDRAFT_895785 [Arabidopsis lyrata subsp. lyrata]	ath:AT1G78850
gi|158940367|gb|EX902725.1|EX902725	287	3762	4082	1031	4051.65	4149.27	965.682	0.0343482	-2.06889	-2.10324	Up	Down	Down	0.494458	0	0	-	-	-	-	-	None
gi|156173396|gb|EW733542.1|EW733542	582	1809	1941	432	960.75	972.933	199.534	0.0181796	-2.26752	-2.2857	Up	Down	Down	0.791355	3.63e-241	2.67e-252	-	-	-	-	-	None
Unigene9491_NAU-YH	999	0	0	513	0.01	0.01	213.385	0	14.3812	14.3812	unchanged	Up	Up		1.36e-213	9.72e-223	-	-	-	-	-	None
CL7197.Contig2_NAU-YH	289	0	0	513	0.01	0.01	207.426	0	14.3403	14.3403	unchanged	Up	Up		2.62e-59	9.65e-62	-	-	-	-	-	None
CL10055.Contig2_NAU-YH	852	0	0	513	0.01	0.01	200.982	0	14.2948	14.2948	unchanged	Up	Up		2.51e-171	1.22e-178	-	-	-	-	-	None
CL6250.Contig2_NAU-YH	1428	0	0	513	0.01	0.01	144.198	0	13.8158	13.8158	unchanged	Up	Up		2.82e-206	4.06e-215	-	-	-	-	-	None
Unigene24043_NAU-YH	836	0	0	513	0.01	0.01	134.73	0	13.7178	13.7178	unchanged	Up	Up		2.8e-112	4.98e-117	-	-	-	-	-	None
Unigene30777_NAU-YH	999	0	0	513	0.01	0.01	105.482	0	13.3647	13.3647	unchanged	Up	Up		5.58e-105	2.15e-109	-	-	-	-	-	None
Unigene27866_NAU-YH	1254	0	0	513	0.01	0.01	102.039	0	13.3168	13.3168	unchanged	Up	Up		1.03e-127	3.98e-133	-	-	-	-	F5M15.26 [Arabidopsis thaliana]	None
CL13542.Contig1_NAU-YH	1364	50	52	733	11.3305	11.1217	144.46	-0.0268446	3.67238	3.69922	Down	Up	Up	0.974383	1.41e-134	1.19e-140	-	-	GO:0005488//binding	-	hypothetical protein ARALYDRAFT_485209 [Arabidopsis lyrata subsp. lyrata]	ath:AT3G48510
Unigene6711_NAU-YH	724	81	84	601	34.5813	33.8471	223.148	-0.0309607	2.68994	2.7209	Down	Up	Up	0.951022	4.59e-82	4.21e-86	K13993|1|9e-60|228|aly:ARALYDRAFT_481866|HSP20 family protein	GO:0044424//intracellular part	-	GO:0006461//protein complex assembly;GO:0033554//cellular response to stress;GO:0009642//response to light intensity;GO:0006970//response to osmotic stress;GO:0044267//cellular protein metabolic process;GO:0009408//response to heat;GO:0000302//response to reactive oxygen species	17.6 kDa class I small heat shock protein [Arabidopsis lyrata subsp. lyrata]	ath:AT2G29500
Unigene2469_NAU-YH	613	76	77	347	38.322	36.6447	152.169	-0.0645691	1.98943	2.054	Down	Up	Up	0.856882	4.06e-33	1.37e-35	K01535|1|2e-97|352|ath:AT2G18960|H+-transporting ATPase [EC:3.6.3.6]	GO:0005911//cell-cell junction;GO:0043231//intracellular membrane-bounded organelle;GO:0031224//intrinsic to membrane;GO:0031090//organelle membrane;GO:0044444//cytoplasmic part	GO:0032550;GO:0019829//cation-transporting ATPase activity;GO:0046872//metal ion binding	GO:0006865//amino acid transport;GO:0015988//energy coupled proton transmembrane transport, against electrochemical gradient;GO:0009664//plant-type cell wall organization;GO:0009152//purine ribonucleotide biosynthetic process;GO:0016482//cytoplasmic transport;GO:0015698//inorganic anion transport;GO:0010118//stomatal movement;GO:0006464//cellular protein modification process;GO:0010035//response …	plasma membrane proton pump H+ ATPase [Arabidopsis thaliana]	ath:AT2G18960	HA1
Unigene21704_NAU-YH	237	1	1	18648	1.30421	1.23093	21151.5	-0.0834281	13.9853	14.0687	Down	Up	Up	0.978153	0	0	-	-	-	-	coat protein [Carica papaya]	None
Unigene27867_NAU-YH	790	1	1	304	0.391262	0.369278	103.444	-0.0834281	8.04649	8.12992	Down	Up	Up	0.964468	4.81e-79	2.06e-82	-	-	-	-	F5M15.26 [Arabidopsis thaliana]	None
CL10372.Contig1_NAU-YH	313	1	1	513	0.98753	0.932043	166.615	-0.0834281	7.39848	7.48191	Down	Up	Up	0.961622	1.54e-49	1.3e-51	-	-	-	-	-	None
CL7054.Contig2_NAU-YH	1792	586	568	2633	101.077	92.4679	394.975	-0.128438	1.9663	2.09474	Down	Up	Up	0.295603	1.47e-246	1.95e-277	K00818|1|2e-42|172|vcn:VOLCADRAFT_127260|acetylornithine aminotransferase [EC:2.6.1.11];K00819|5|5e-41|167|osa:4333554|ornithine--oxo-acid transaminase [EC:2.6.1.13]	GO:0009536//plastid;GO:0031090//organelle membrane	GO:0046914//transition metal ion binding;GO:0043168;GO:0003867//4-aminobutyrate transaminase activity	GO:0009875//pollen-pistil interaction;GO:0009062//fatty acid catabolic process;GO:0035966//response to topologically incorrect protein;GO:0005984//disaccharide metabolic process;GO:0009063//cellular amino acid catabolic process;GO:0006105//succinate metabolic process;GO:0048868//pollen tube development;GO:0022622//root system development;GO:0006511//ubiquitin-dependent protein catabolic process;G…	gamma-aminobutyrate transaminase subunit precursor [Arabidopsis lyrata subsp. lyrata]	ath:AT3G22200	POP2
Unigene30454_NAU-YH	389	89	86	673	70.7189	64.4955	465.075	-0.132897	2.7173	2.85019	Down	Up	Up	0.671406	6.55e-93	2.59e-101	K01728|1|4e-70|260|ath:AT1G67750|pectate lyase [EC:4.2.2.2]	-	GO:0016837	-	F12A21.12 [Arabidopsis thaliana]	ath:AT1G67750
Unigene12634_NAU-YH	224	18	16	513	24.8382	20.8378	106.807	-0.253353	2.10437	2.35773	Down	Up	Up	0.729043	1.85e-09	5.52e-11	-	-	GO:0008168//methyltransferase activity	-	O-methyltransferase-like protein [Arabidopsis thaliana]	ath:AT1G76790
Unigene2500_NAU-YH	2069	7	6	66234	1.04576	0.846002	8605.53	-0.305821	13.0065	13.3123	Down	Up	Up	0.798161	0	0	-	-	-	-	-	None
Unigene2387_NAU-YH	491	71	57	306	44.6963	33.8668	167.532	-0.400285	1.90621	2.30649	Down	Up	Up	0.272221	1.16e-27	2.92e-36	-	GO:0043231//intracellular membrane-bounded organelle	GO:0001071//nucleic acid binding transcription factor activity;GO:0003677//DNA binding	GO:0006351//transcription, DNA-dependent;GO:0016109;GO:0006732//coenzyme metabolic process;GO:0009639//response to red or far red light;GO:0006779//porphyrin-containing compound biosynthetic process;GO:0003006//developmental process involved in reproduction;GO:0010160//formation of organ boundary;GO:0006090//pyruvate metabolic process;GO:0008283//cell proliferation;GO:0009668;GO:0009886//post-emb…	hypothetical protein ARALYDRAFT_491396 [Arabidopsis lyrata subsp. lyrata]	ath:AT4G32980	ATH1
CL1685.Contig2_NAU-YH	655	182	146	918	85.8865	65.0267	376.755	-0.401398	2.13312	2.53452	Down	Up	Up	0.0463013	1.83e-95	1.17e-121	K01238|1|5e-28|122|ath:AT5G24550|[EC:3.2.1.-];K01188|3|3e-25|113|sbi:SORBI_06g019840|beta-glucosidase [EC:3.2.1.21]	-	-	-	myrosinase, thioglucoside glucohydrolase [Brassica napus]	ath:AT1G47600	BGLU34
gi|161561608|gb|EY933519.1|EY933519	727	73	58	308	31.0373	23.2742	113.887	-0.415272	1.87553	2.2908	Down	Up	Up	0.249722	2.97e-27	3.37e-36	K01183|1|2e-29|127|ath:AT3G12500|chitinase [EC:3.2.1.14]	GO:0043231//intracellular membrane-bounded organelle;GO:0005576//extracellular region	GO:0001871;GO:0004553//hydrolase activity, hydrolyzing O-glycosyl compounds	GO:0009696//salicylic acid metabolic process;GO:0048764;GO:0043479;GO:0009414//response to water deprivation;GO:0044036//cell wall macromolecule metabolic process;GO:0030243//cellulose metabolic process;GO:0045229//external encapsulating structure organization;GO:0006007//glucose catabolic process;GO:0032535//regulation of cellular component size;GO:0009826//unidimensional cell growth;GO:0006996/…	chitinase [Brassica rapa]	ath:AT1G05850	POM1
CL4840.Contig2_NAU-YH	1289	84	65	625	20.1429	14.711	130.342	-0.453378	2.69396	3.14734	Down	Up	Up	0.157103	1.75e-85	6.84e-104	-	GO:0043231//intracellular membrane-bounded organelle	GO:0001071//nucleic acid binding transcription factor activity;GO:0003677//DNA binding	GO:0006351//transcription, DNA-dependent;GO:0016109;GO:0006732//coenzyme metabolic process;GO:0009639//response to red or far red light;GO:0006779//porphyrin-containing compound biosynthetic process;GO:0003006//developmental process involved in reproduction;GO:0010160//formation of organ boundary;GO:0006090//pyruvate metabolic process;GO:0008283//cell proliferation;GO:0009668;GO:0009886//post-emb…	hypothetical protein ARALYDRAFT_491396 [Arabidopsis lyrata subsp. lyrata]	ath:AT4G32980	ATH1
CL8049.Contig3_NAU-YH	3532	316	236	1646	27.6542	19.4927	125.276	-0.504566	2.17953	2.6841	Down	Up	Up	0.000330149	7.26e-176	8.13e-233	K11596|1|2e-126|452|ath:AT1G48410|argonaute	GO:0044424//intracellular part	GO:0003723//RNA binding	GO:0006952//defense response;GO:0002252	hypothetical protein ARALYDRAFT_473645 [Arabidopsis lyrata subsp. lyrata]	ath:AT1G31280	AGO2
CL47.Contig1_NAU-YH	1606	22701	16353	83737	4369.12	2970.52	14016.2	-0.556629	1.68168	2.2383	Down	Up	Up	0	0	0	K00430|1|0.0|651|ath:AT4G21960|peroxidase [EC:1.11.1.7]	-	GO:0043169//cation binding;GO:0046906//tetrapyrrole binding;GO:0016209//antioxidant activity;GO:0003824//catalytic activity	GO:0000097//sulfur amino acid biosynthetic process;GO:0009746;GO:0006970//response to osmotic stress;GO:0006873//cellular ion homeostasis;GO:0019758;GO:0030001//metal ion transport;GO:0042044//fluid transport	peroxidase [Eutrema halophilum]	ath:AT4G21960	PRXR1
gi|158916714|gb|EX889991.1|EX889991	775	165	116	607	65.8078	43.6653	210.545	-0.591769	1.6778	2.26957	Down	Up	Up	0.00378805	7.45e-46	1.52e-70	K07375|1|2e-125|433|aly:ARALYDRAFT_476725|tubulin beta	-	-	-	tubulin beta [Arabidopsis thaliana]	ath:AT1G75780	TUB1
CL4872.Contig1_NAU-YH	1222	69	46	1572	17.4531	10.9816	345.811	-0.668391	4.30843	4.97682	Down	Up	Up	0.0527306	0	0	K05933|1|2e-162|570|ath:AT1G77330|aminocyclopropanecarboxylate oxidase [EC:1.14.17.4]	-	GO:0016705//oxidoreductase activity, acting on paired donors, with incorporation or reduction of molecular oxygen;GO:0016641//oxidoreductase activity, acting on the CH-NH2 group of donors, oxygen as acceptor	GO:0010035//response to inorganic substance;GO:0016129;GO:0009267//cellular response to starvation;GO:0000041//transition metal ion transport;GO:0009692;GO:0015698//inorganic anion transport	aminocyclopropanecarboxylate oxidase [Arabidopsis thaliana]	ath:AT1G77330
Unigene5800_NAU-YH	1165	68	45	466	18.0417	11.2685	107.527	-0.679038	2.57529	3.25433	Down	Up	Up	0.0507021	1.17e-60	6.97e-80	K01097|1|3e-13|74.3|ppp:PHYPADRAFT_170201|N-acylneuraminate-9-phosphatase [EC:3.1.3.29];K00861|3|9e-06|49.7|aly:ARALYDRAFT_914528|riboflavin kinase [EC:2.7.1.26]	-	GO:0016791//phosphatase activity	GO:0009648//photoperiodism;GO:0042221//response to chemical stimulus	haloacid dehalogenase-like hydrolase domain-containing protein [Arabidopsis thaliana]	ath:AT2G41250
Unigene27463_NAU-YH	1901	354	216	1019	57.5594	33.1476	144.095	-0.796146	1.3239	2.12005	Down	Up	Up	1.45e-09	2.89e-54	7.3e-109	-	-	-	-	hypothetical protein ARALYDRAFT_485786 [Arabidopsis lyrata subsp. lyrata]	ath:AT3G53950
CL1841.Contig3_NAU-YH	446	5	3	232	3.46521	1.96231	139.833	-0.820394	5.33462	6.15501	Down	Up	Up	0.677431	1.15e-53	6.26e-59	K01177|1|2e-31|132|aly:ARALYDRAFT_915010|beta-amylase [EC:3.2.1.2]	GO:0009532//plastid stroma	GO:0016160//amylase activity	GO:0005982//starch metabolic process;GO:0000023//maltose metabolic process;GO:0006950//response to stress	beta-amylase [Arabidopsis thaliana]	ath:AT4G17090	CT-BMY
CL6557.Contig3_NAU-YH	327	35	21	513	33.0838	18.7349	117.556	-0.820394	1.82915	2.64955	Down	Up	Up	0.114303	1.73e-12	6.34e-20	-	-	GO:0046914//transition metal ion binding	GO:0009725//response to hormone stimulus;GO:0010243//response to organic nitrogen;GO:0006873//cellular ion homeostasis;GO:0030001//metal ion transport	brassinosteroid-responsive RING-H2 [Arabidopsis thaliana]	ath:AT3G61460	BRH1
CL4471.Contig2_NAU-YH	1341	194	112	766	44.7165	24.3652	153.553	-0.875986	1.77985	2.65584	Down	Up	Up	2.13e-06	9.2e-63	6.23e-107	K01376|1|0.0|734|ath:AT1G47128|[EC:3.4.22.-];K01365|4|8e-115|412|smo:SELMODRAFT_183539|cathepsin L [EC:3.4.22.15]	GO:0005576//extracellular region;GO:0009536//plastid	GO:0016628//oxidoreductase activity, acting on the CH-CH group of donors, NAD or NADP as acceptor;GO:0070011//peptidase activity, acting on L-amino acid peptides	GO:0019538//protein metabolic process;GO:0006970//response to osmotic stress;GO:0044710	senescence-associated cysteine protease [Brassica oleracea]	ath:AT1G47128	RD21
Unigene24287_NAU-YH	794	68	39	387	26.4718	14.3293	131.023	-0.885489	2.30729	3.19278	Down	Up	Up	0.00960358	2.23e-44	3.93e-65	-	-	-	-	-	None
Unigene30381_NAU-YH	1178	293	167	1792	76.8807	41.3572	408.931	-0.894481	2.41116	3.30564	Down	Up	Up	1.18e-09	2.32e-216	0	-	-	-	GO:0009725//response to hormone stimulus;GO:0006950//response to stress	hypothetical protein [Arabidopsis thaliana]	ath:AT1G11210
gi|158940901|gb|EX903233.1|EX903233	792	174	98	454	67.9077	36.0979	154.095	-0.911662	1.18217	2.09383	Down	Up	Up	3.65e-06	1.63e-20	1.06e-47	K01183|1|1e-37|154|osa:4338718|chitinase [EC:3.2.1.14]	-	-	-	chitinase [Brassica rapa]	ath:AT1G05850	POM1
CL3001.Contig3_NAU-YH	437	51	28	279	36.0731	18.6921	171.625	-0.948499	2.25026	3.19876	Down	Up	Up	0.0200279	4.03e-31	5.41e-47	-	-	-	GO:0006950//response to stress;GO:0045333//cellular respiration	hypothetical protein [Arabidopsis thaliana]	ath:AT3G10020
Unigene30536_NAU-YH	862	248	125	603	88.9281	42.3042	188.047	-1.07184	1.08038	2.15222	Down	Up	Up	5.95e-11	1.59e-23	1.29e-65	-	GO:0009534//chloroplast thylakoid	GO:0005515//protein binding;GO:0001071//nucleic acid binding transcription factor activity;GO:0003676//nucleic acid binding;GO:0046906//tetrapyrrole binding	GO:0009888//tissue development;GO:0043479;GO:0009664//plant-type cell wall organization;GO:0006091//generation of precursor metabolites and energy;GO:0000904//cell morphogenesis involved in differentiation;GO:0009409//response to cold;GO:0048437//floral organ development	stress enhanced protein 2 [Arabidopsis thaliana]	ath:AT2G21970	SEP2
Unigene21705_NAU-YH	2144	6	3	39545	0.86501	0.408204	4958.2	-1.08343	12.4848	13.5682	Down	Up	Up	0.502012	0	0	K14442|1|1e-06|53.9|mtr:MTR_1g056490|ATP-dependent RNA helicase DHX36 [EC:3.6.4.13]	-	-	GO:0022402//cell cycle process;GO:0044260;GO:0071840;GO:0090304	hypothetical protein OsI_35917 [Oryza sativa Indica Group]	ath:AT1G27900
Unigene21709_NAU-YH	1004	2	1	9532	0.615731	0.290567	2552.16	-1.08343	12.0171	13.1006	Down	Up	Up	0.70852	0	0	-	-	-	-	-	None
CL5510.Contig1_NAU-YH	429	15	7	513	10.8076	4.76016	122.816	-1.18296	3.50639	4.68935	Down	Up	Up	0.186636	1.34e-34	4.91e-44	-	-	-	-	-	None
Unigene9454_NAU-YH	849	241	108	513	87.7413	37.1105	114.936	-1.24143	0.389502	1.63093	Down	Up	Up	2.46e-13	0.00520593	3.03e-27	-	-	-	-	-	None
gi|156154262|gb|EW714408.1|EW714408	786	9	4	429	3.53928	1.48463	146.721	-1.25335	5.37347	6.62683	Down	Up	Up	0.314768	7.47e-100	5.43e-112	-	-	-	-	-	None
Unigene21710_NAU-YH	1167	7	3	65166	1.85405	0.749948	15010.9	-1.30582	12.983	14.2889	Down	Up	Up	0.392794	0	0	-	-	-	-	hypothetical protein [Plantago major]	None
CL1788.Contig2_NAU-YH	1578	75	32	601	14.6909	5.91594	102.382	-1.31225	2.80097	4.11322	Down	Up	Up	6.27e-05	1.09e-85	6.71e-125	K11000|1|0.0|991|aly:ARALYDRAFT_325786|callose synthase [EC:2.4.1.-]	GO:0016020//membrane;GO:0043234//protein complex	GO:0035251//UDP-glucosyltransferase activity	GO:0007010//cytoskeleton organization;GO:0016044//cellular membrane organization;GO:0030422//production of siRNA involved in RNA interference;GO:0006342//chromatin silencing;GO:0007154//cell communication;GO:0009555//pollen development;GO:0035195//gene silencing by miRNA;GO:0033205//cell cycle cytokinesis;GO:0052386//cell wall thickening;GO:0034968//histone lysine methylation;GO:0006074//(1->3)-b…	hypothetical protein ARALYDRAFT_325786 [Arabidopsis lyrata subsp. lyrata]	ath:AT5G13000	GSL12
gi|332774693|gb|FY433004.1|FY433004	753	2979	1215	7187	1222.84	470.719	2565.72	-1.3773	1.06913	2.44643	Down	Up	Up	8.83e-189	1.38e-272	0	-	-	-	-	dormancy/auxin associated protein [Arabidopsis thaliana]	ath:AT2G33830
Unigene13031_NAU-YH	1479	464	187	1922	96.9716	36.8853	349.335	-1.39451	1.84898	3.24349	Down	Up	Up	3.79e-30	9e-166	0	K00640|1|0.0|635|aly:ARALYDRAFT_897528|serine O-acetyltransferase [EC:2.3.1.30]	GO:0009536//plastid	GO:0046914//transition metal ion binding;GO:0016412//serine O-acyltransferase activity	GO:0006563//L-serine metabolic process;GO:0006568//tryptophan metabolic process;GO:0015698//inorganic anion transport;GO:0019758;GO:0010038//response to metal ion;GO:0009683;GO:0000097//sulfur amino acid biosynthetic process;GO:0009267//cellular response to starvation	mitochondrial serine acetyltransferase [Thlaspi goesingense]	ath:AT3G13110	SERAT2;2
Unigene12531_NAU-YH	477	3	1	513	1.94401	0.611592	109.894	-1.66839	5.82093	7.48932	Down	Up	Up	0.55059	1.11e-46	6.82e-52	-	GO:0043231//intracellular membrane-bounded organelle	GO:0005488//binding	-	hypothetical protein ARALYDRAFT_894881 [Arabidopsis lyrata subsp. lyrata]	ath:AT1G70640
gi|158660068|gb|EX769959.1|EX769959	656	486	151	801	228.996	67.1512	328.236	-1.76984	0.519412	2.28925	Down	Up	Up	1.45e-44	3.36e-09	4.12e-94	K01512|1|3e-32|136|ath:AT5G03370|acylphosphatase [EC:3.6.1.7]	GO:0009536//plastid	GO:0016818//hydrolase activity, acting on acid anhydrides, in phosphorus-containing anhydrides	-	At5g03370 [Arabidopsis thaliana]	ath:AT5G03370
CL11087.Contig2_NAU-YH	1092	492	145	691	139.263	38.737	170.103	-1.84603	0.288593	2.13463	Down	Up	Up	8.34e-48	0.00337838	1.98e-74	-	-	-	-	-	None
CL10391.Contig1_NAU-YH	1588	14	4	705	2.72504	0.734835	119.343	-1.89078	5.45269	7.34347	Down	Up	Up	0.0509717	1.83e-165	3.79e-189	-	-	-	-	F5M15.26 [Arabidopsis thaliana]	None
Unigene1655_NAU-YH	855	477	135	740	172.444	46.0626	232.661	-1.90446	0.432102	2.33656	Down	Up	Up	2.36e-48	2.64e-06	4.08e-89	-	-	-	-	-	None
CL7697.Contig1_NAU-YH	992	546	152	729	170.128	44.7005	197.548	-1.92826	0.215584	2.14384	Down	Up	Up	2.94e-56	0.0301254	5.92e-79	K03686|1|6e-10|63.2|pop:POPTR_1082525|molecular chaperone DnaJ	-	GO:0005515//protein binding	GO:0044267//cellular protein metabolic process	DNAJ heat shock N-terminal domain-containing protein [Arabidopsis lyrata subsp. lyra	ath:AT3G13310
gi|161541563|gb|EY913465.1|EY913465	686	125	33	260	56.3223	14.0336	101.884	-2.00482	0.85515	2.85997	Down	Up	Up	7.96e-14	2.55e-07	3.29e-39	K13993|1|2e-09|60.5|vvi:100267696|HSP20 family protein	GO:0042579//microbody	-	GO:0005982//starch metabolic process;GO:0043094	peroxisomal small heat shock protein ACD31.2 [Brassica rapa]	ath:AT1G06460	ACD32.1
CL5796.Contig1_NAU-YH	1388	2601	685	3123	579.223	143.973	604.839	-2.00832	0.0624322	2.07075	Down	Up	Up	9.52e-283	0.227553	0	K01376|1|2e-174|610|ath:AT4G16190|[EC:3.4.22.-];K01373|3|2e-109|394|ppp:PHYPADRAFT_209158|cathepsin F [EC:3.4.22.41]	GO:0043231//intracellular membrane-bounded organelle	GO:0070011//peptidase activity, acting on L-amino acid peptides	GO:0042743//hydrogen peroxide metabolic process;GO:0009414//response to water deprivation;GO:0019538//protein metabolic process;GO:0006952//defense response;GO:0006970//response to osmotic stress	Papain family cysteine protease [Arabidopsis thaliana]	ath:AT4G16190
gi|161564059|gb|EY935288.1|EY935288	718	292	73	355	125.705	29.6605	132.911	-2.08343	0.0804167	2.16384	Down	Up	Up	2.11e-33	0.635227	6.85e-39	-	-	-	-	-	None
CL4428.Contig2_NAU-YH	1262	997	234	4747	244.192	54.0925	1011.15	-2.17451	2.04992	4.22443	Down	Up	Up	4.62e-120	0	0	K13993|1|1e-41|169|mtr:MTR_5g091960|HSP20 family protein	GO:0042579//microbody	-	GO:0005982//starch metabolic process;GO:0043094	peroxisomal small heat shock protein ACD31.2 [Brassica rapa]	ath:AT1G06460	ACD32.1
Unigene30478_NAU-YH	885	299	67	627	104.429	22.0857	190.45	-2.24134	0.866886	3.10823	Down	Up	Up	1.74e-37	3.86e-17	5.64e-103	-	GO:0044464//cell part	GO:0061135;GO:0016787//hydrolase activity	GO:0010035//response to inorganic substance;GO:0009725//response to hormone stimulus;GO:0009628//response to abiotic stimulus;GO:0044699;GO:1901700;GO:0019538//protein metabolic process;GO:0010466//negative regulation of peptidase activity;GO:0006950//response to stress	trypsin and protease inhibitor family protein [Arabidopsis lyrata subsp. lyrata]	ath:AT1G73325
Unigene26211_NAU-YH	8383	2752	456	4013	101.471	15.8689	128.685	-2.6768	0.342767	3.01957	Down	Up	Up	0	1.46e-20	0	-	-	-	-	predicted protein [Arabidopsis thaliana]	None
CL11023.Contig1_NAU-YH	509	37	6	220	22.4687	3.43886	116.188	-2.70792	2.37047	5.07839	Down	Up	Up	3.97e-06	3.67e-26	1.29e-51	K07975|1|2e-11|66.2|aly:ARALYDRAFT_895459|Rho family, other;K04392|2|2e-11|66.2|zma:542739|Ras-related C3 botulinum toxin substrate 1	-	-	GO:0046474//glycerophospholipid biosynthetic process	Wound-responsive family protein [Arabidopsis thaliana]	ath:AT4G05070
CL4653.Contig7_NAU-YH	785	759	83	987	298.859	30.8453	337.991	-3.27634	0.177516	3.45386	Down	Up	Up	6.71e-144	0.0377578	6.75e-179	K03098|1|7e-93|338|aly:ARALYDRAFT_918995|outer membrane lipoprotein Blc	GO:0005911//cell-cell junction;GO:0031090//organelle membrane;GO:0043231//intracellular membrane-bounded organelle;GO:0044444//cytoplasmic part	-	GO:0051234//establishment of localization;GO:0009314//response to radiation;GO:0006972//hyperosmotic response	temperature-induced lipocalin [Brassica rapa]	ath:AT5G58070	TIL
gi|313133829|gb|HS106938.1|HS106938	803	105	6	1670	40.4174	2.1798	559.06	-4.21271	3.78995	8.00266	Down	Up	Up	2.24e-24	0	0	-	-	-	GO:0052386//cell wall thickening;GO:0016044//cellular membrane organization;GO:0009555//pollen development;GO:0033036	cell wall-plasma membrane linker protein [Arabidopsis thaliana]	ath:AT3G22120	CWLP
gi|156159537|gb|EW719683.1|EW719683	822	991	43	1162	372.646	15.2608	380.007	-4.6099	0.0282192	4.63812	Down	Up	Up	7.83e-245	0.75041	1.19e-261	-	-	-	GO:0034285;GO:0009746	auxin-repressed protein [Brassica rapa subsp. pekinensis]	ath:AT2G33830
CL10439.Contig4_NAU-YH	1300	2733	94	4686	649.817	21.0943	968.983	-4.94511	0.576438	5.52155	Down	Up	Up	0	1.27e-61	0	-	GO:0005911//cell-cell junction	-	GO:0048646//anatomical structure formation involved in morphogenesis;GO:0000902//cell morphogenesis;GO:0009827//plant-type cell wall modification;GO:0000003//reproduction	expansin B1 [Raphanus sativus]	ath:AT4G28250	EXPB3
Unigene19599_NAU-YH	1627	994	28	1520	188.84	5.02055	251.138	-5.23318	0.41132	5.64449	Down	Up	Up	2.85e-263	3.17e-11	0	-	-	-	-	-	None
Unigene25886_NAU-YH	248	60	1	513	74.7815	1.17633	161.507	-5.99032	1.11084	7.10116	Down	Up	Up	1.38e-16	1.58e-06	4.21e-39	-	-	-	-	-	None
gi|158926039|gb|EX899768.1|EX899768	876	2	0	412	0.705701	0.01	126.43	-6.14099	7.48507	13.6261	Down	Up	Up	0.430707	3.92e-106	4.74e-115	-	-	-	-	trypsin inhibitor (Kunitz) domain-containing protein [Arabidopsis thaliana]	ath:AT1G72290
CL10953.Contig1_NAU-YH	356	1	0	217	0.86825	0.01	163.858	-6.44004	7.56012	14.0002	Down	Up	Up	0.674233	1.07e-55	4.72e-60	K15283|1|3e-11|64.7|aly:ARALYDRAFT_678848|solute carrier family 35, member E1	GO:0031224//intrinsic to membrane	-	GO:0051234//establishment of localization	glucose 6-Pi/Pi transporter [Eutrema halophilum]	None
Unigene5940_NAU-YH	620	188	2	1825	93.7262	0.941063	791.277	-6.63802	3.07766	9.71567	Down	Up	Up	4.77e-54	1.63e-286	0	-	-	-	-	-	None
CL7599.Contig3_NAU-YH	862	313	2	440	112.236	0.676867	137.215	-7.37345	0.289907	7.66335	Down	Up	Up	1.38e-92	0.0244855	1.29e-118	-	GO:0016020//membrane	GO:0015142//tricarboxylic acid transmembrane transporter activity;GO:0015291//secondary active transmembrane transporter activity	GO:0034614//cellular response to reactive oxygen species;GO:0015893//drug transport;GO:0009267//cellular response to starvation;GO:0010039//response to iron ion;GO:0000041//transition metal ion transport;GO:0006875//cellular metal ion homeostasis;GO:0015698//inorganic anion transport;GO:0045491//xylan metabolic process;GO:0009723//response to ethylene stimulus	ferric reductase defective 3 [Arabidopsis thaliana]	ath:AT3G08040	FRD3
Unigene5867_NAU-YH	1040	567	3	792	168.517	0.841528	204.715	-7.64567	0.280718	7.92639	Down	Up	Up	1.81e-169	0.00207878	1.64e-215	-	-	-	-	-	None
Unigene5941_NAU-YH	660	212	1	1994	99.2857	0.442015	812.154	-7.81135	3.0321	10.8434	Down	Up	Up	3.79e-63	0	0	-	-	-	-	-	None
CL6736.Contig1_NAU-YH	743	7	0	299	2.91209	0.01	108.178	-8.18591	5.21521	13.4011	Down	Up	Up	0.0263133	1.56e-68	3.71e-83	-	GO:0016020//membrane;GO:0009532//plastid stroma;GO:0009526//plastid envelope	GO:0005488//binding	GO:0009813//flavonoid biosynthetic process;GO:0070887//cellular response to chemical stimulus;GO:0006007//glucose catabolic process;GO:0042743//hydrogen peroxide metabolic process;GO:0006996//organelle organization;GO:0006970//response to osmotic stress;GO:0010038//response to metal ion;GO:0050794//regulation of cellular process;GO:0032502//developmental process;GO:0042044//fluid transport	salt tolerance-related protein [Arabidopsis thaliana]	ath:AT1G13930
Unigene30444_NAU-YH	947	648	1	916	211.505	0.308057	260.018	-9.42328	0.29792	9.7212	Down	Up	Up	6.84e-199	0.000347348	6.39e-255	-	-	-	-	-	None
CL5175.Contig2_NAU-YH	653	21	0	255	9.94033	0.01	104.975	-9.95715	3.4006	13.3578	Down	Up	Up	2.78e-06	8e-44	9.44e-71	-	-	GO:0046914//transition metal ion binding	GO:0030003//cellular cation homeostasis;GO:0006950//response to stress;GO:0006006//glucose metabolic process;GO:0010038//response to metal ion	metallothionein-like protein [Brassica rapa]	ath:AT3G09390	MT2A
Unigene5744_NAU-YH	330	23	0	513	21.5431	0.01	105.898	-11.073	2.29737	13.3704	Down	Up	Up	7.15e-07	4.58e-15	1.27e-35	-	-	-	-	-	None
Unigene30392_NAU-YH	911	96	0	1604	32.5722	0.01	473.307	-11.6694	3.86106	15.5305	Down	Up	Up	3.79e-29	0	0	-	-	-	-	-	None
Unigene1939_NAU-YH	1232	180	0	1504	45.1603	0.01	328.167	-12.1408	2.8613	15.0021	Down	Up	Up	3.24e-55	2.14e-219	0	-	-	-	-	-	None
Unigene19637_NAU-YH	1150	363	0	723	97.5672	0.01	169.004	-13.2522	0.792592	14.0448	Down	Up	Up	2.71e-112	5.7e-17	5.8e-203	-	-	-	-	-	None
Unigene2263_NAU-YH	948	1363	380	513	444.409	116.938	132.14	-1.92614	-1.74982	0.176325	Down	Down	Up	4.31e-140	1.04e-128	0.22192	K01703|1|3e-132|469|aly:ARALYDRAFT_682975|3-isopropylmalate/(R)-2-methylmalate dehydratase large subunit [EC:4.2.1.33 4.2.1.35]	GO:0009532//plastid stroma	GO:0051536//iron-sulfur cluster binding;GO:0016866//intramolecular transferase activity;GO:0016836//hydro-lyase activity	GO:0006007//glucose catabolic process;GO:0005984//disaccharide metabolic process;GO:0010038//response to metal ion;GO:0005982//starch metabolic process;GO:0006520//cellular amino acid metabolic process;GO:0006970//response to osmotic stress;GO:0019758	predicted protein [Arabidopsis lyrata subsp. lyrata]	ath:AT4G13430	IIL1
gi|332787032|gb|FY452756.1|FY452756	832	638	177	513	237.024	62.0627	84.0054	-1.93324	-1.49648	0.436756	Down	Down	Up	6.23e-66	4.14e-48	0.0107907	K13448|1|1e-70|264|ath:AT5G37770|calcium-binding protein CML	GO:0043231//intracellular membrane-bounded organelle;GO:0016020//membrane	GO:0046872//metal ion binding	GO:0009642//response to light intensity;GO:0006952//defense response;GO:0010038//response to metal ion;GO:0009725//response to hormone stimulus;GO:0000302//response to reactive oxygen species;GO:0009908//flower development;GO:0048571//long-day photoperiodism;GO:0051171//regulation of nitrogen compound metabolic process;GO:0043200//response to amino acid stimulus;GO:0009605//response to external s…	hypothetical protein ARALYDRAFT_493755 [Arabidopsis lyrata subsp. lyrata]	ath:AT5G37770	TCH2
CL325.Contig4_NAU-YH	1502	691	191	513	142.201	37.0974	51.5442	-1.93854	-1.46405	0.47449	Down	Down	Up	1.16e-71	2.08e-50	0.00287655	K00924|1|0.0|856|ath:AT3G57530|[EC:2.7.1.-];K13412|2|0.0|851|aly:ARALYDRAFT_907222|calcium-dependent protein kinase [EC:2.7.11.1]	GO:0005911//cell-cell junction;GO:0016020//membrane;GO:0043231//intracellular membrane-bounded organelle	GO:0032550;GO:0046872//metal ion binding;GO:0004697//protein kinase C activity	GO:0009813//flavonoid biosynthetic process;GO:0006984//ER-nucleus signaling pathway;GO:0007243//intracellular protein kinase cascade;GO:0010243//response to organic nitrogen;GO:0009755//hormone-mediated signaling pathway;GO:0006605//protein targeting;GO:0006796//phosphate-containing compound metabolic process;GO:0006972//hyperosmotic response;GO:0006464//cellular protein modification process;GO:0…	calcium-dependent protein kinase 32 [Arabidopsis thaliana]	ath:AT3G57530	CPK32
CL2682.Contig1_NAU-YH	1269	707	194	513	172.208	44.5985	51.8993	-1.94908	-1.73036	0.218719	Down	Down	Up	7.48e-74	8.79e-66	0.290649	-	GO:0009536//plastid	-	GO:0009813//flavonoid biosynthetic process;GO:0009605//response to external stimulus;GO:0010243//response to organic nitrogen;GO:0009664//plant-type cell wall organization;GO:0006928//cellular component movement;GO:0006605//protein targeting;GO:0000904//cell morphogenesis involved in differentiation;GO:0009626//plant-type hypersensitive response	hypothetical protein [Arabidopsis thaliana]	ath:AT1G18740
CL3725.Contig1_NAU-YH	1108	377	103	513	105.171	27.1193	51.1917	-1.95535	-1.03876	0.916593	Down	Down	Up	1.25e-39	2.56e-16	9.05e-07	K15777|1|2e-132|470|ath:AT4G15093|4,5-DOPA dioxygenase extradiol [EC:1.13.11.-]	-	GO:0005506//iron ion binding;GO:0016701//oxidoreductase activity, acting on single donors with incorporation of molecular oxygen	GO:0044710;GO:0044237//cellular metabolic process	hypothetical protein [Arabidopsis thaliana]	ath:AT4G15093
CL7842.Contig3_NAU-YH	1021	1386	378	513	419.597	108.006	143.492	-1.9579	-1.54803	0.409864	Down	Down	Up	1.3e-145	1.18e-109	0.000201467	K09286|1|8e-69|258|ath:AT3G15210|EREBP-like factor	GO:0044451//nucleoplasm part	GO:0001071//nucleic acid binding transcription factor activity;GO:0003676//nucleic acid binding	GO:0006351//transcription, DNA-dependent;GO:0010243//response to organic nitrogen;GO:0009873//ethylene mediated signaling pathway;GO:0002252;GO:0002218//activation of innate immune response	ethylene-responsive transcription factor 4 [Arabidopsis thaliana]	ath:AT3G15210	ERF4
Unigene5909_NAU-YH	818	411	111	513	155.304	39.5868	119.62	-1.97201	-0.376634	1.59537	Down	Down	Up	1.13e-43	0.0015551	1.78e-26	-	-	-	-	hypothetical protein ARALYDRAFT_492479 [Arabidopsis lyrata subsp. lyrata]	ath:AT4G23880
Unigene22543_NAU-YH	1447	796	214	513	170.035	43.1445	66.1361	-1.97859	-1.36233	0.616261	Down	Down	Up	8.03e-85	4.89e-52	7.71e-06	-	-	-	-	unnamed protein product [Arabidopsis thaliana]	None
CL11245.Contig1_NAU-YH	1257	643	172	513	158.114	39.9184	72.7111	-1.98584	-1.12072	0.86512	Down	Down	Up	7.24e-69	4.99e-31	1.17e-09	-	GO:0005911//cell-cell junction;GO:0016020//membrane	-	-	hypothetical protein ARALYDRAFT_471972 [Arabidopsis lyrata subsp. lyrata]	ath:AT1G17620
gi|161565300|gb|EY936952.1|EY936952	810	273	73	513	104.177	26.2917	57.0822	-1.98636	-0.867926	1.11843	Down	Down	Up	2.21e-29	4.88e-09	1.44e-07	K11251|1|5e-38|155|vvi:100241700|histone H2A	GO:0000785//chromatin;GO:0043231//intracellular membrane-bounded organelle	GO:0003676//nucleic acid binding;GO:0046983//protein dimerization activity	GO:0034728//nucleosome organization	PREDICTED: probable histone H2A.4 isoform 1 [Vitis vinifera]	ath:AT5G02560	HTA12
Unigene21223_NAU-YH	1487	551	147	513	114.534	28.8394	51.8834	-1.98966	-1.14244	0.847229	Down	Down	Up	3.48e-59	1.78e-27	5.84e-08	K01188|1|0.0|717|ath:AT5G42260|beta-glucosidase [EC:3.2.1.21]	GO:0005618//cell wall;GO:0043231//intracellular membrane-bounded organelle;GO:0005911//cell-cell junction;GO:0044444//cytoplasmic part	GO:0016798//hydrolase activity, acting on glycosyl bonds;GO:0043167//ion binding	GO:0006996//organelle organization;GO:0044238//primary metabolic process;GO:0032412//regulation of ion transmembrane transporter activity;GO:0006970//response to osmotic stress;GO:0070838//divalent metal ion transport;GO:0000904//cell morphogenesis involved in differentiation	hypothetical protein ARALYDRAFT_486479 [Arabidopsis lyrata subsp. lyrata]	ath:AT3G60130	BGLU16
gi|161546513|gb|EY918136.1|EY918136	529	173	45	513	101.085	24.8163	29.9815	-2.0262	-1.75342	0.272784	Down	Down	Up	3.16e-19	1.05e-16	0.584504	-	GO:0009536//plastid	GO:0016160//amylase activity;GO:0043167//ion binding	GO:0005982//starch metabolic process;GO:0051707//response to other organism	beta-amylase [Arabidopsis thaliana]	ath:AT4G15210	BAM5
CL662.Contig1_NAU-YH	1180	1019	264	505	266.924	65.2683	115.045	-2.03197	-1.21423	0.81774	Down	Down	Up	1.91e-112	1.25e-55	6.96e-13	K00430|1|4e-177|619|aly:ARALYDRAFT_345443|peroxidase [EC:1.11.1.7]	GO:0044444//cytoplasmic part	GO:0046906//tetrapyrrole binding;GO:0016209//antioxidant activity;GO:0043169//cation binding;GO:0003824//catalytic activity	GO:0006952//defense response;GO:0044710	peroxidase [Arabidopsis thaliana]	ath:AT2G37130
Unigene21978_NAU-YH	1266	436	112	433	106.45	25.8086	91.9415	-2.04426	-0.211395	1.83286	Down	Down	Up	1.48e-48	0.0900991	3.5e-38	K08818|1|7e-07|53.5|vvi:100246062|cell division cycle 2-like [EC:2.7.11.22]	GO:0043231//intracellular membrane-bounded organelle	-	-	hypothetical protein ARALYDRAFT_486202 [Arabidopsis lyrata subsp. lyrata]	ath:AT3G57540
CL4010.Contig3_NAU-YH	779	659	169	214	261.483	63.2892	73.8471	-2.04668	-1.8241	0.222582	Down	Down	Up	1.97e-73	5.11e-66	0.330993	-	GO:0009536//plastid	GO:0005488//binding;GO:0016783//sulfurtransferase activity	GO:0009683;GO:0006568//tryptophan metabolic process	thiosulfate sulfurtransferase [Arabidopsis thaliana]	ath:AT5G66040	STR16
gi|161578158|gb|EY949471.1|EY949471	585	437	110	123	230.898	54.8551	56.5206	-2.07356	-2.03041	0.043149	Down	Down	Up	1.43e-49	1.21e-50	0.90687	-	-	-	-	membrane-associated progesterone binding protein 2 [Arabidopsis lyrata subsp. lyrata	ath:AT2G24940	MAPR2
CL9574.Contig1_NAU-YH	1148	427	105	115	114.969	26.6826	26.9286	-2.10727	-2.09404	0.0132387	Down	Down	Up	1.86e-49	1.61e-51	0.957627	-	GO:0043231//intracellular membrane-bounded organelle	-	GO:0010243//response to organic nitrogen	hypothetical protein [Arabidopsis thaliana]	ath:AT5G44060
CL10950.Contig1_NAU-YH	1151	1699	412	560	456.261	104.424	130.789	-2.1274	-1.80262	0.324777	Down	Down	Up	5.27e-199	2.92e-167	0.00359837	K00640|1|2e-128|456|aly:ARALYDRAFT_495767|serine O-acetyltransferase [EC:2.3.1.30]	GO:0044444//cytoplasmic part	GO:0016412//serine O-acyltransferase activity	GO:0051707//response to other organism;GO:0009694//jasmonic acid metabolic process;GO:0009626//plant-type hypersensitive response;GO:0006605//protein targeting;GO:0009755//hormone-mediated signaling pathway;GO:0006563//L-serine metabolic process	serine O-acetyltransferase Sat-52 [Arabidopsis lyrata subsp. lyrata]	ath:AT5G56760	SERAT1;1
Unigene11135_NAU-YH	947	523	126	415	170.705	38.8151	117.803	-2.13682	-0.535134	1.60168	Down	Down	Up	1.25e-61	1.67e-07	2.52e-30	K03239|1|1e-09|62.0|aly:ARALYDRAFT_682509|translation initiation factor eIF-2B subunit alpha	GO:0044424//intracellular part	-	-	protein LURP-one-related 5 [Arabidopsis thaliana]	ath:AT1G80120
CL6588.Contig3_NAU-YH	909	455	108	189	154.719	34.6609	55.8927	-2.15826	-1.46891	0.689349	Down	Down	Up	2.55e-54	1.77e-33	0.000539256	K09286|1|4e-22|103|aly:ARALYDRAFT_476975|EREBP-like factor	-	-	GO:0009628//response to abiotic stimulus;GO:0050794//regulation of cellular process;GO:0051716//cellular response to stimulus;GO:0006950//response to stress	ethylene-responsive transcription factor RAP2-4 [Arabidopsis thaliana]	ath:AT1G78080	RAP2.4
CL13763.Contig1_NAU-YH	830	399	94	183	148.59	33.0393	59.2694	-2.16908	-1.32598	0.843105	Down	Down	Up	5.96e-48	3.21e-25	3.02e-05	K09286|1|1e-10|65.5|vvi:100246641|EREBP-like factor	-	-	GO:0044699;GO:0034654	hypothetical protein ARALYDRAFT_476245 [Arabidopsis lyrata subsp. lyrata]	ath:AT1G71130
CL9095.Contig3_NAU-YH	1531	685	157	332	138.296	29.9161	58.2935	-2.20877	-1.24635	0.962413	Down	Down	Up	3.88e-84	4.64e-39	3.38e-11	-	-	GO:0046914//transition metal ion binding	GO:0009072//aromatic amino acid family metabolic process;GO:0009404//toxin metabolic process;GO:0014070//response to organic cyclic compound	hypothetical protein ARALYDRAFT_482676 [Arabidopsis lyrata subsp. lyrata]	ath:AT2G36950
CL8883.Contig1_NAU-YH	1264	838	192	244	204.924	44.3134	51.8919	-2.20927	-1.9815	0.227769	Down	Down	Up	5.93e-103	6.77e-94	0.273268	K01876|1|1e-43|175|ath:AT4G26870|aspartyl-tRNA synthetase [EC:6.1.1.12];K14484|4|7e-41|166|aly:ARALYDRAFT_319024|auxin-responsive protein IAA	GO:0009536//plastid	GO:0001071//nucleic acid binding transcription factor activity;GO:0016791//phosphatase activity;GO:0005515//protein binding	GO:0006412//translation;GO:0005975//carbohydrate metabolic process;GO:0009755//hormone-mediated signaling pathway;GO:0006351//transcription, DNA-dependent;GO:0007275//multicellular organismal development;GO:0003006//developmental process involved in reproduction	phytochrome-associated protein 2 [Arabidopsis thaliana]	ath:AT4G29080	PAP2
CL8256.Contig3_NAU-YH	1265	748	170	412	182.77	39.2048	87.5516	-2.22093	-1.06183	1.1591	Down	Down	Up	1.63e-92	5.03e-33	1.55e-18	K09422|1|2e-130|464|ath:AT5G67300|myb proto-oncogene protein, plant	GO:0043231//intracellular membrane-bounded organelle	GO:0003676//nucleic acid binding;GO:0001071//nucleic acid binding transcription factor activity	GO:0006952//defense response;GO:0010038//response to metal ion;GO:0009725//response to hormone stimulus;GO:0010243//response to organic nitrogen;GO:0006970//response to osmotic stress;GO:0014070//response to organic cyclic compound;GO:0009966//regulation of signal transduction;GO:0006351//transcription, DNA-dependent;GO:0048528//post-embryonic root development	transcription factor MYB44 [Arabidopsis thaliana]	ath:AT5G67300	MYBR1
CL2563.Contig3_NAU-YH	1275	569	127	220	137.942	29.0586	46.3842	-2.24703	-1.57236	0.674669	Down	Down	Up	2.08e-71	3.52e-46	0.000212371	K08286|1|0.0|669|ath:AT3G08730|protein-serine/threonine kinase [EC:2.7.11.-];K04688|2|0.0|662|aly:ARALYDRAFT_478175|p70 ribosomal S6 kinase [EC:2.7.11.1];K08282|5|2e-155|547|osa:4332748|non-specific serine/threonine protein kinase [EC:2.7.11.1]	GO:0043231//intracellular membrane-bounded organelle	GO:0032550;GO:0004674//protein serine/threonine kinase activity	GO:0006984//ER-nucleus signaling pathway;GO:0010243//response to organic nitrogen;GO:0006412//translation;GO:0009755//hormone-mediated signaling pathway;GO:0006605//protein targeting;GO:0006796//phosphate-containing compound metabolic process;GO:0006970//response to osmotic stress;GO:0006464//cellular protein modification process;GO:0009626//plant-type hypersensitive response	serine/threonine protein kinase 2 [Arabidopsis thaliana]	ath:AT3G08720	S6K2
gi|166131535|gb|FD565327.1|FD565327	770	328	73	96	131.667	27.6575	33.5149	-2.25116	-1.97402	0.277132	Down	Down	Up	2.57e-41	1.07e-36	0.461314	K13424|1|3e-17|87.0|zma:100281160|WRKY transcription factor 33	-	-	-	WRKY transcription factor 18 [Arabidopsis thaliana]	ath:AT4G31800	WRKY18
CL4356.Contig1_NAU-YH	1852	1696	367	910	283.061	57.8103	132.086	-2.29171	-1.09963	1.19208	Down	Down	Up	4.24e-218	7.6e-79	1.81e-42	K00128|1|0.0|955|aly:ARALYDRAFT_485161|aldehyde dehydrogenase (NAD+) [EC:1.2.1.3]	GO:0009536//plastid	GO:0016620//oxidoreductase activity, acting on the aldehyde or oxo group of donors, NAD or NADP as acceptor;GO:0032550	GO:0044710;GO:0010038//response to metal ion	aldehyde dehydrogenase 2B4 [Arabidopsis thaliana]	ath:AT3G48000	ALDH2B4
CL11106.Contig3_NAU-YH	1001	664	143	204	205.035	41.6757	54.7839	-2.2986	-1.90405	0.394548	Down	Down	Up	1.09e-85	1.54e-70	0.0518319	K11275|1|2e-08|58.5|osa:4342583|histone H1/5	GO:0043229//intracellular organelle	GO:0003676//nucleic acid binding	GO:0044763	high mobility group protein IY [Brassica napus]	ath:AT1G14900	HMGA
CL2368.Contig2_NAU-YH	904	1001	213	445	342.263	68.7372	132.327	-2.31594	-1.371	0.944946	Down	Down	Up	2.27e-130	5.12e-66	1.95e-14	-	-	-	GO:0044767;GO:0051707//response to other organism	senescence associated protein 20 [Arabidopsis thaliana]	ath:AT3G10985	SAG20
CL496.Contig3_NAU-YH	564	238	49	80	130.435	25.3453	38.1301	-2.36354	-1.77432	0.589212	Down	Down	Up	7.16e-32	3.63e-23	0.0912099	K10406|1|2e-07|53.5|pop:POPTR_569144|kinesin family member C2/C3	GO:0016020//membrane	GO:0004672//protein kinase activity;GO:0032550	GO:0006464//cellular protein modification process	Putative receptor-like serinethreonine kinase - partial protein [Arabidopsis thaliana]	ath:AT1G29720
Unigene26303_NAU-YH	221	107	22	513	149.653	29.041	59.602	-2.36546	-1.32819	1.03727	Down	Down	Up	1.58e-14	3.16e-07	0.0218645	-	-	-	-	-	None
gi|158927816|gb|EX900142.1|EX900142	788	291	59	86	114.146	21.8427	29.3379	-2.38566	-1.96004	0.425616	Down	Down	Up	2.41e-39	2.7e-32	0.229973	-	-	-	-	hypothetical protein ARALYDRAFT_478145 [Arabidopsis lyrata subsp. lyrata]	ath:AT3G08030
CL635.Contig2_NAU-YH	797	296	60	254	114.796	21.9621	85.6708	-2.38599	-0.422203	1.96379	Down	Down	Up	5.06e-40	0.00309056	1.27e-24	-	GO:0043231//intracellular membrane-bounded organelle	-	GO:0009725//response to hormone stimulus;GO:0008104//protein localization	expressed protein [Arabidopsis thaliana]	ath:AT1G56220
CL3003.Contig1_NAU-YH	1304	1748	354	603	414.342	79.1965	124.307	-2.38731	-1.73691	0.650403	Down	Down	Up	3.08e-236	2.45e-163	2.06e-10	-	GO:0009536//plastid	-	-	hypothetical protein ARALYDRAFT_479805 [Arabidopsis lyrata subsp. lyrata]	ath:AT4G14620
CL8983.Contig8_NAU-YH	797	258	52	198	100.059	19.0338	66.7827	-2.39422	-0.583305	1.81091	Down	Down	Up	4.69e-35	0.000121996	2.7e-17	-	GO:0043231//intracellular membrane-bounded organelle	GO:0003676//nucleic acid binding;GO:0046914//transition metal ion binding	GO:0009626//plant-type hypersensitive response;GO:0009813//flavonoid biosynthetic process;GO:0010243//response to organic nitrogen;GO:0006605//protein targeting;GO:0007165//signal transduction;GO:0002252	zinc finger A20 and AN1 domain-containing stress-associated protein 6 [Arabidopsis thali	ath:AT2G36320
CL22.Contig3_NAU-YH	1633	732	147	174	138.554	26.261	28.6431	-2.39946	-2.27419	0.125265	Down	Down	Up	1.71e-99	6.02e-98	0.69038	K09561|1|1e-06|53.5|ath:AT3G07370|STIP1 homology and U-box containing protein 1 [EC:6.3.2.19]	GO:0043234//protein complex;GO:0044444//cytoplasmic part	GO:0019787//small conjugating protein ligase activity	GO:0007243//intracellular protein kinase cascade;GO:0010243//response to organic nitrogen;GO:0016044//cellular membrane organization;GO:0009755//hormone-mediated signaling pathway;GO:0042743//hydrogen peroxide metabolic process;GO:0006605//protein targeting;GO:0006812//cation transport;GO:0002252;GO:0016567//protein ubiquitination;GO:0046942//carboxylic acid transport;GO:0009626//plant-type hyper…	E3 ubiquitin-protein ligase PUB23 [Arabidopsis thaliana]	ath:AT2G35930	PUB23
gi|332772818|gb|FY439722.1|FY439722	844	330	64	129	120.855	22.1217	41.087	-2.44975	-1.55653	0.893221	Down	Down	Up	5.16e-46	1.49e-26	0.000327583	-	GO:0016020//membrane;GO:0009532//plastid stroma;GO:0009534//chloroplast thylakoid;GO:0009526//plastid envelope	GO:0005515//protein binding;GO:0003676//nucleic acid binding	GO:0009813//flavonoid biosynthetic process;GO:0051707//response to other organism;GO:0006007//glucose catabolic process;GO:0009755//hormone-mediated signaling pathway;GO:0042743//hydrogen peroxide metabolic process;GO:0034728//nucleosome organization;GO:0009791//post-embryonic development;GO:0006970//response to osmotic stress;GO:0010038//response to metal ion;GO:0048869//cellular developmental p…	salt tolerance-related protein [Arabidopsis thaliana]	ath:AT1G13930
gi|158944694|gb|EX906964.1|EX906964	784	373	72	298	147.058	26.7915	102.178	-2.45653	-0.525297	1.93124	Down	Down	Up	3.66e-52	2.11e-05	3.16e-28	K00799|1|2e-70|263|aly:ARALYDRAFT_482003|glutathione S-transferase [EC:2.5.1.18]	-	-	-	glutathione S-transferase ERD13 [Arabidopsis thaliana]	ath:AT2G30870	GSTF10
gnl|UG|Rsa#S42049331	1807	10978	2048	7117	1877.85	330.638	1058.76	-2.50576	-0.826708	1.67905	Down	Down	Up	0	0	0	K01188|1|1e-121|435|sbi:SORBI_06g019840|beta-glucosidase [EC:3.2.1.21]	GO:0043231//intracellular membrane-bounded organelle	GO:0004553//hydrolase activity, hydrolyzing O-glycosyl compounds;GO:0043169//cation binding	GO:0044238//primary metabolic process	myrosinase [Raphanus sativus]	ath:AT5G26000	TGG1
CL635.Contig3_NAU-YH	795	343	63	117	133.359	23.1182	39.5618	-2.52821	-1.75313	0.775079	Down	Down	Up	1.34e-49	1.18e-32	0.00341421	-	GO:0043231//intracellular membrane-bounded organelle	-	GO:0009725//response to hormone stimulus;GO:0008104//protein localization	dormancy/auxin associated protein [Arabidopsis thaliana]	ath:AT1G56220
gi|166128656|gb|FD561706.1|FD561706	716	236	43	96	101.881	17.5201	36.0425	-2.53981	-1.49911	1.04069	Down	Down	Up	2.32e-34	4.03e-18	0.000471141	K08901|1|1e-53|165|aly:ARALYDRAFT_490167|photosystem II oxygen-evolving enhancer protein 3	GO:0005576//extracellular region;GO:0009532//plastid stroma;GO:0009523//photosystem II;GO:0009534//chloroplast thylakoid	GO:0046872//metal ion binding	GO:0019684//photosynthesis, light reaction;GO:0015992//proton transport;GO:0009639//response to red or far red light;GO:0009642//response to light intensity;GO:0030001//metal ion transport;GO:0034285;GO:0043094;GO:0006996//organelle organization;GO:0006470//protein dephosphorylation;GO:0006873//cellular ion homeostasis;GO:0042254//ribosome biogenesis	photosystem II subunit Q-2 [Arabidopsis lyrata subsp. lyrata]	ath:AT4G05180	PSBQ-2
CL8983.Contig5_NAU-YH	859	958	174	417	344.721	59.0931	130.497	-2.54437	-1.40141	1.14295	Down	Down	Up	1.75e-139	2.42e-65	2.38e-18	-	GO:0043231//intracellular membrane-bounded organelle	GO:0046872//metal ion binding	GO:0009626//plant-type hypersensitive response;GO:0009813//flavonoid biosynthetic process;GO:0010243//response to organic nitrogen;GO:0006605//protein targeting;GO:0007165//signal transduction;GO:0002252	hypothetical protein ARALYDRAFT_485652 [Arabidopsis lyrata subsp. lyrata]	ath:AT2G36320
Unigene8483_NAU-YH	296	1286	229	368	1342.9	225.696	334.205	-2.5729	-2.00655	0.566352	Down	Down	Up	1.1e-189	1.8e-146	2.94e-05	-	GO:0005911//cell-cell junction;GO:0016020//membrane	-	GO:0009725//response to hormone stimulus	hypothetical protein ARALYDRAFT_473038 [Arabidopsis lyrata subsp. lyrata]	ath:AT1G28290	AGP31
CL5479.Contig1_NAU-YH	751	416	73	97	171.218	28.3572	34.7207	-2.59404	-2.30196	0.292082	Down	Down	Up	6.38e-62	1.48e-56	0.416626	K01873|1|4e-64|242|aly:ARALYDRAFT_326110|valyl-tRNA synthetase [EC:6.1.1.9];K00799|2|3e-15|77.0|ppp:PHYPADRAFT_166420|glutathione S-transferase [EC:2.5.1.18]	GO:0009532//plastid stroma;GO:0042579//microbody;GO:0005576//extracellular region;GO:0016020//membrane	GO:0015038//glutathione disulfide oxidoreductase activity;GO:0046914//transition metal ion binding;GO:0072341//modified amino acid binding	GO:0010038//response to metal ion;GO:0009725//response to hormone stimulus;GO:0000302//response to reactive oxygen species;GO:0006464//cellular protein modification process;GO:0009608//response to symbiont;GO:0014070//response to organic cyclic compound;GO:0009404//toxin metabolic process;GO:0044403//symbiosis, encompassing mutualism through parasitism	hypothetical protein ARALYDRAFT_476670 [Arabidopsis lyrata subsp. lyrata]	ath:AT1G75270	DHAR2
gi|156171905|gb|EW732051.1|EW732051	814	618	108	266	234.671	38.7061	87.8445	-2.6	-1.41761	1.18239	Down	Down	Up	3.19e-92	5.61e-43	1.78e-12	-	-	-	-	-	None
Unigene27372_NAU-YH	451	204	35	64	139.813	22.6398	38.147	-2.62657	-1.87386	0.752711	Down	Down	Up	7.03e-31	1.9e-21	0.052445	K14488|1|4e-17|85.1|ath:AT4G00880|SAUR family protein	GO:0043231//intracellular membrane-bounded organelle	-	GO:0009725//response to hormone stimulus;GO:0070838//divalent metal ion transport	SAUR-like auxin-responsive protein [Arabidopsis thaliana]	ath:AT4G00880
CL911.Contig7_NAU-YH	1266	545	93	188	133.063	21.4304	39.9192	-2.63438	-1.73696	0.897424	Down	Down	Up	1.57e-82	5.01e-51	6.64e-06	K08237|1|0.0|639|aly:ARALYDRAFT_490463|hydroquinone glucosyltransferase [EC:2.4.1.218]	GO:0009536//plastid	GO:0035251//UDP-glucosyltransferase activity	GO:0009626//plant-type hypersensitive response;GO:0009813//flavonoid biosynthetic process;GO:0006805//xenobiotic metabolic process;GO:0006605//protein targeting;GO:0006970//response to osmotic stress	UDP-glucosyltransferase 72B3 [Arabidopsis thaliana]	ath:AT1G01420	UGT72B3
gi|166105731|gb|FD537629.1|FD537629	725	393	67	76	167.552	26.9598	28.1795	-2.63572	-2.57189	0.0638325	Down	Down	Up	1.48e-59	6.05e-61	0.886534	-	GO:0005911//cell-cell junction;GO:0005618//cell wall;GO:0044444//cytoplasmic part	-	GO:0048646//anatomical structure formation involved in morphogenesis;GO:0000902//cell morphogenesis;GO:0009827//plant-type cell wall modification	expansin A1 [Raphanus sativus]	ath:AT2G39700	EXPA4
CL3247.Contig1_NAU-YH	964	411	70	157	131.783	21.1837	43.7804	-2.63714	-1.58981	1.04733	Down	Down	Up	2.54e-62	5.42e-34	2.58e-06	-	-	GO:0005488//binding	GO:0018130;GO:1901362;GO:0044238//primary metabolic process;GO:0006950//response to stress;GO:0009725//response to hormone stimulus;GO:0019438//aromatic compound biosynthetic process	myb family transcription factor [Arabidopsis thaliana]	ath:AT1G19000
Unigene12950_NAU-YH	1379	1260	211	474	282.424	44.6374	92.3998	-2.66154	-1.6119	1.04964	Down	Down	Up	4.4e-193	8.81e-106	3.48e-18	-	-	-	-	-	None
gi|167442994|gb|FD949482.1|FD949482	684	536	89	254	242.216	37.959	99.824	-2.67378	-1.27884	1.39495	Down	Down	Up	1.61e-82	6.67e-32	2.76e-15	K05283|1|5e-09|59.3|aly:ARALYDRAFT_354960|phosphatidylinositol glycan, class W [EC:2.3.-.-];K11982|2|2e-07|54.3|gmx:100787523|E3 ubiquitin-protein ligase RNF115/126 [EC:6.3.2.19]	-	-	-	RING/U-box domain-containing protein [Arabidopsis thaliana]	ath:AT1G63840
CL6644.Contig3_NAU-YH	1774	1208	200	346	210.479	32.8895	52.43	-2.67798	-2.00521	0.672766	Down	Down	Up	2.19e-186	1.79e-137	1.5e-06	K04371|1|0.0|727|aly:ARALYDRAFT_484948|extracellular signal-regulated kinase 1/2 [EC:2.7.11.24]	-	GO:0032550;GO:0004702//receptor signaling protein serine/threonine kinase activity	GO:0006091//generation of precursor metabolites and energy;GO:0006470//protein dephosphorylation;GO:0003006//developmental process involved in reproduction;GO:0010243//response to organic nitrogen;GO:0006351//transcription, DNA-dependent;GO:0009626//plant-type hypersensitive response;GO:0009411//response to UV;GO:0048580;GO:0042743//hydrogen peroxide metabolic process;GO:0006605//protein targetin…	mitogen-activated protein kinase 3 [Brassica napus]	ath:AT3G45640	MPK3
CL6119.Contig2_NAU-YH	1873	5152	844	2455	850.223	131.457	352.347	-2.69325	-1.27084	1.4224	Down	Down	Up	0	1.27e-301	1.81e-150	K01179|1|5e-161|566|vvi:100260645|endoglucanase [EC:3.2.1.4]	-	GO:0004553//hydrolase activity, hydrolyzing O-glycosyl compounds	GO:0051707//response to other organism;GO:0048437//floral organ development;GO:0044238//primary metabolic process;GO:0044260;GO:0009933//meristem structural organization;GO:0010087//phloem or xylem histogenesis;GO:0009943//adaxial/abaxial axis specification;GO:0009799//specification of symmetry	glycosyl hydrolase family 9 protein [Arabidopsis lyrata subsp. lyrata]	ath:AT4G02290	GH9B13
gi|332774837|gb|FY437110.1|FY437110	636	210	34	53	102.06	15.5956	22.4014	-2.71021	-2.18776	0.522452	Down	Down	Up	6.92e-33	5.95e-27	0.269592	-	-	-	-	VQ motif-containing protein [Arabidopsis lyrata subsp. lyrata]	ath:AT3G56880
Unigene21171_NAU-YH	957	476	77	147	153.741	23.4725	41.2917	-2.71146	-1.89658	0.81488	Down	Down	Up	2.02e-74	2.38e-50	0.000401646	-	-	-	-	hypothetical protein ARALYDRAFT_471493 [Arabidopsis lyrata subsp. lyrata]	ath:AT1G13390
gi|167476106|gb|FD959153.1|FD959153	251	596	94	138	733.952	109.253	147.796	-2.74801	-2.31208	0.43593	Down	Down	Up	1.47e-94	2.08e-81	0.090824	-	-	-	-	-	None
CL6692.Contig1_NAU-YH	874	311	49	72	109.988	16.3555	22.1451	-2.74949	-2.31228	0.437209	Down	Down	Up	2.16e-49	1.47e-42	0.273201	-	-	-	-	protein trichome birefringence-like 25 [Arabidopsis thaliana]	ath:AT1G01430	TBL25
CL11597.Contig3_NAU-YH	884	730	114	693	255.25	37.6212	210.736	-2.76229	-0.276475	2.48582	Down	Down	Up	1.77e-116	0.00165999	9.23e-90	-	GO:0044424//intracellular part	GO:0005488//binding	GO:0009642//response to light intensity;GO:0006007//glucose catabolic process;GO:0006996//organelle organization;GO:0010038//response to metal ion;GO:0006970//response to osmotic stress;GO:0042743//hydrogen peroxide metabolic process;GO:0008104//protein localization;GO:0042044//fluid transport	ERD15 protein [Brassica rapa]	ath:AT2G41430	ERD15
Unigene13842_NAU-YH	821	1435	213	463	540.261	75.6862	151.599	-2.83555	-1.8334	1.00215	Down	Down	Up	1.27e-235	1.29e-144	1.69e-16	K13448|1|3e-68|256|aly:ARALYDRAFT_889234|calcium-binding protein CML	GO:0016020//membrane;GO:0043231//intracellular membrane-bounded organelle	GO:0046872//metal ion binding	-	RecName: Full=Probable calcium-binding protein CML27; AltName: Full=Calmodulin-like protein 27	ath:AT1G18210
Unigene11800_NAU-YH	3218	4111	604	2539	394.872	54.756	212.097	-2.8503	-0.896663	1.95363	Down	Down	Up	0	5.52e-136	3.03e-244	K00058|1|0.0|988|ath:AT1G17745|D-3-phosphoglycerate dehydrogenase [EC:1.1.1.95]	GO:0009536//plastid	GO:0032550;GO:0016616//oxidoreductase activity, acting on the CH-OH group of donors, NAD or NADP as acceptor;GO:0031406//carboxylic acid binding;GO:0000166//nucleotide binding	GO:0009553//embryo sac development;GO:0006563//L-serine metabolic process	D-3-phosphoglycerate dehydrogenase [Arabidopsis thaliana]	ath:AT1G17745
Unigene30535_NAU-YH	495	464	68	164	289.739	40.076	89.0627	-2.85395	-1.70186	1.15208	Down	Down	Up	1.2e-76	3.02e-42	1.45e-07	-	GO:0043231//intracellular membrane-bounded organelle	-	-	hypothetical protein ARALYDRAFT_492020 [Arabidopsis lyrata subsp. lyrata]	ath:AT4G27657
gi|158940105|gb|EX902437.1|EX902437	581	205	30	144	109.062	15.0635	66.626	-2.85602	-0.710989	2.14503	Down	Down	Up	6.03e-34	3.82e-05	1.01e-15	-	GO:0031224//intrinsic to membrane	-	GO:0009683;GO:0006568//tryptophan metabolic process;GO:0009605//response to external stimulus	arabinogalactan protein 16 [Arabidopsis thaliana]	ath:AT2G46330	AGP16
gi|158666320|gb|EX776211.1|EX776211	821	354	47	137	133.277	16.7007	44.8575	-2.99644	-1.57101	1.42544	Down	Down	Up	1.7e-61	7.74e-29	1.08e-08	K03781|1|9e-70|261|aly:ARALYDRAFT_312977|catalase [EC:1.11.1.6]	-	-	-	catalase 2 [Brassica rapa subsp. pekinensis]	ath:AT4G35090	CAT2
CL2942.Contig1_NAU-YH	964	401	53	60	128.577	16.0391	16.7314	-3.00297	-2.942	0.0609643	Down	Down	Up	8.23e-70	5.28e-72	0.911011	K15104|1|2e-114|410|ath:AT2G22500|solute carrier family 25 (mitochondrial oxoglutarate transporter), member 11	GO:0019866//organelle inner membrane;GO:0005740//mitochondrial envelope;GO:0031224//intrinsic to membrane	GO:0046943//carboxylic acid transmembrane transporter activity	GO:0044763;GO:0010243//response to organic nitrogen;GO:0006818//hydrogen transport;GO:0006811//ion transport	putative mitochondrial dicarboxylate carrier protein [Arabidopsis thaliana]	ath:AT2G22500	UCP5
Unigene21355_NAU-YH	533	265	35	66	153.679	19.1567	33.2869	-3.00399	-2.20689	0.797105	Down	Down	Up	3.65e-46	2.78e-34	0.035769	K00430|1|1e-66|249|aly:ARALYDRAFT_917590|peroxidase [EC:1.11.1.7]	-	GO:0003824//catalytic activity;GO:0016209//antioxidant activity;GO:0043169//cation binding;GO:0046906//tetrapyrrole binding	GO:0044710;GO:0006950//response to stress	peroxidase 64 [Arabidopsis lyrata subsp. lyrata]	ath:AT5G42180
CL1594.Contig1_NAU-YH	1243	1003	130	188	249.416	30.5107	40.6578	-3.03117	-2.61695	0.414215	Down	Down	Up	2.11e-176	1.38e-158	0.0516795	K05359|1|0.0|654|aly:ARALYDRAFT_910257|arogenate/prephenate dehydratase [EC:4.2.1.91 4.2.1.51]	GO:0009536//plastid	GO:0016836//hydro-lyase activity	GO:0009813//flavonoid biosynthetic process;GO:0043479;GO:0006605//protein targeting;GO:0006558//L-phenylalanine metabolic process;GO:0009409//response to cold;GO:0009626//plant-type hypersensitive response;GO:0048437//floral organ development	prephenate dehydratase family protein [Arabidopsis lyrata subsp. lyrata]	ath:AT5G22630	ADT5
Unigene17488_NAU-YH	333	140	18	513	129.951	15.7692	19.3742	-3.04279	-2.74575	0.297032	Down	Down	Up	8.87e-25	1.62e-23	0.721723	-	-	-	-	-	None
Unigene5920_NAU-YH	571	1044	128	213	565.144	65.3965	100.277	-3.11133	-2.49463	0.616704	Down	Down	Up	1.92e-188	3.38e-156	0.000949815	-	-	-	GO:0009725//response to hormone stimulus;GO:0000160//two-component signal transduction system (phosphorelay);GO:0010243//response to organic nitrogen;GO:0006950//response to stress;GO:0009694//jasmonic acid metabolic process;GO:0051707//response to other organism	hypothetical protein ARALYDRAFT_890872 [Arabidopsis lyrata subsp. lyrata]	ath:AT1G32920
Unigene26044_NAU-YH	355	423	51	313	368.304	41.9104	237.014	-3.13552	-0.635929	2.49959	Down	Down	Up	7.38e-77	3.28e-08	9.27e-41	-	-	-	-	hypothetical protein ARALYDRAFT_905664 [Arabidopsis lyrata subsp. lyrata]	ath:AT3G45160
CL12028.Contig4_NAU-YH	898	334	40	47	114.965	12.9946	14.0695	-3.1452	-3.03055	0.114655	Down	Down	Up	7.23e-61	7.95e-62	0.818436	-	GO:0044464//cell part	GO:0046914//transition metal ion binding	GO:0071555//cell wall organization	Ran-binding zinc finger protein [Brassica rapa]	ath:AT3G15680
CL10537.Contig2_NAU-YH	629	207	24	120	101.722	11.1312	51.2847	-3.19195	-0.98803	2.20392	Down	Down	Up	2.79e-38	1.46e-08	1.37e-13	-	-	GO:0043169//cation binding	GO:0006351//transcription, DNA-dependent;GO:0009696//salicylic acid metabolic process;GO:0009605//response to external stimulus;GO:0007243//intracellular protein kinase cascade;GO:0010243//response to organic nitrogen;GO:0009755//hormone-mediated signaling pathway;GO:0042743//hydrogen peroxide metabolic process;GO:0006605//protein targeting;GO:0006812//cation transport;GO:0009626//plant-type hype…	metal ion binding [Brassica rapa]	ath:AT5G52750
Unigene20363_NAU-YH	577	205	23	43	109.818	11.6287	20.0332	-3.23935	-2.45465	0.784697	Down	Down	Up	1.93e-38	3.09e-30	0.118167	-	-	-	-	putative non-LTR retroelement reverse transcriptase [Arabidopsis thaliana]	None
CL6781.Contig4_NAU-YH	1029	975	109	612	292.876	30.9024	159.88	-3.2445	-0.873305	2.3712	Down	Down	Up	3.19e-183	4.51e-31	5.48e-75	K08488|1|3e-33|140|ath:AT1G32270|syntaxin 7	GO:0005911//cell-cell junction;GO:0031090//organelle membrane;GO:0009536//plastid	-	GO:0006952//defense response;GO:0002252;GO:0051707//response to other organism	NDR1/HIN1-Like protein 3 [Arabidopsis thaliana]	ath:AT5G06320	NHL3
Unigene968_NAU-YH	1656	1238	136	194	231.076	23.9585	31.4919	-3.26976	-2.87532	0.394444	Down	Down	Up	2.1e-234	4.51e-217	0.0605185	K09422|1|2e-145|514|aly:ARALYDRAFT_919385|myb proto-oncogene protein, plant	GO:0043231//intracellular membrane-bounded organelle	GO:0001071//nucleic acid binding transcription factor activity;GO:0003676//nucleic acid binding	GO:0006351//transcription, DNA-dependent;GO:0010675;GO:0042742//defense response to bacterium;GO:0019758;GO:0014070//response to organic cyclic compound;GO:0009725//response to hormone stimulus;GO:0015851//nucleobase transport;GO:0009267//cellular response to starvation	R2R3 DNA binding transcription factor MYB28-3 [Brassica juncea]	ath:AT5G61420	MYB28
Unigene21229_NAU-YH	1045	374	41	170	110.624	11.4458	43.731	-3.27277	-1.33894	1.93383	Down	Down	Up	8.87e-71	5.08e-24	3.09e-16	K07025|1|3e-135|479|aly:ARALYDRAFT_668954|putative hydrolase of the HAD superfamily	-	GO:0003824//catalytic activity	-	predicted protein [Arabidopsis lyrata subsp. lyrata]	ath:AT2G32150
Unigene15293_NAU-YH	981	1145	124	169	360.771	36.8751	46.31	-3.29036	-2.96169	0.328677	Down	Down	Up	4.79e-218	4.55e-207	0.168167	-	-	-	-	hypothetical protein [Arabidopsis thaliana]	ath:AT2G42760
CL5208.Contig1_NAU-YH	837	576	59	208	212.712	20.564	66.8029	-3.37071	-1.67092	1.69979	Down	Down	Up	4.63e-112	4.95e-51	1.17e-16	-	GO:0043231//intracellular membrane-bounded organelle	GO:0008194//UDP-glycosyltransferase activity	GO:0006984//ER-nucleus signaling pathway;GO:0006950//response to stress;GO:0009755//hormone-mediated signaling pathway;GO:0044723	hypothetical protein ARALYDRAFT_905093 [Arabidopsis lyrata subsp. lyrata]	ath:AT3G28340	GATL10
Unigene30715_NAU-YH	749	588	60	193	242.656	23.3695	69.268	-3.37621	-1.80865	1.56756	Down	Down	Up	1.43e-114	3.07e-58	7.78e-14	-	GO:0042579//microbody	-	-	thioesterase-like protein [Arabidopsis thaliana]	ath:AT1G48320
gi|161563036|gb|EY934175.1|EY934175	640	809	81	196	390.718	36.922	82.3253	-3.40357	-2.24672	1.15685	Down	Down	Up	7.52e-159	1.3e-106	5.29e-09	-	-	-	GO:0009725//response to hormone stimulus;GO:0007165//signal transduction	hypothetical protein ARALYDRAFT_496763 [Arabidopsis lyrata subsp. lyrata]	ath:AT5G65300
gi|166101384|gb|FD535960.1|FD535960	630	368	36	53	180.552	16.6703	22.6148	-3.43707	-2.99708	0.43999	Down	Down	Up	8.04e-73	2.37e-67	0.363259	K01602|1|1e-101|367|aly:ARALYDRAFT_494137|ribulose-bisphosphate carboxylase small chain [EC:4.1.1.39]	-	-	-	ribulose bisphosphate carboxylase [Arabidopsis lyrata subsp. lyrata]	ath:AT5G38430
Unigene21250_NAU-YH	687	354	34	197	159.273	14.4379	77.0844	-3.46357	-1.04699	2.41658	Down	Down	Up	1.6e-70	1.5e-15	1.04e-24	K11982|1|9e-25|111|mtr:MTR_6g079660|E3 ubiquitin-protein ligase RNF115/126 [EC:6.3.2.19]	-	GO:0046914//transition metal ion binding	-	C3H4 type zinc finger protein [Arabidopsis thaliana]	ath:AT3G46620
CL514.Contig2_NAU-YH	1014	921	88	265	280.748	25.3178	70.253	-3.47105	-1.99864	1.47241	Down	Down	Up	4.53e-184	2.24e-104	3.04e-17	K02717|1|7e-118|421|aly:ARALYDRAFT_470689|photosystem II oxygen-evolving enhancer protein 2	GO:0005576//extracellular region;GO:0009532//plastid stroma;GO:0009523//photosystem II;GO:0009534//chloroplast thylakoid;GO:0009526//plastid envelope	GO:0046872//metal ion binding;GO:0008187//poly-pyrimidine tract binding;GO:0016628//oxidoreductase activity, acting on the CH-CH group of donors, NAD or NADP as acceptor	GO:0009696//salicylic acid metabolic process;GO:0007243//intracellular protein kinase cascade;GO:0015992//proton transport;GO:0009639//response to red or far red light;GO:0009642//response to light intensity;GO:0010243//response to organic nitrogen;GO:0034285;GO:0009755//hormone-mediated signaling pathway;GO:0042743//hydrogen peroxide metabolic process;GO:0006605//protein targeting;GO:0009767//ph…	photosystem II subunit P-1 [Arabidopsis thaliana]	ath:AT1G06680	PSBP-1
Unigene5740_NAU-YH	886	587	56	160	204.786	18.4389	48.5449	-3.47329	-2.07672	1.39657	Down	Down	Up	2.67e-117	5.29e-70	8.62e-10	-	-	-	-	hypothetical protein [Arabidopsis thaliana]	ath:AT5G56980
CL5450.Contig2_NAU-YH	1640	921	87	269	173.584	15.4759	44.0926	-3.48754	-1.97703	1.51051	Down	Down	Up	7.73e-185	7.09e-103	3.68e-18	K08145|1|6e-89|326|vvi:100266019|MFS transporter, SP family, solute carrier family 2 (facilitated glucose transporter), member 8	GO:0000325//plant-type vacuole;GO:0031224//intrinsic to membrane	GO:0005402//cation:sugar symporter activity	GO:0006568//tryptophan metabolic process;GO:0044763;GO:0008643//carbohydrate transport;GO:0010243//response to organic nitrogen;GO:0015698//inorganic anion transport;GO:0006970//response to osmotic stress;GO:0009814//defense response, incompatible interaction;GO:0010035//response to inorganic substance;GO:0009683;GO:0009725//response to hormone stimulus	sugar transporter ERD6-like 3 [Arabidopsis thaliana]	ath:AT1G08920	ESL1
Unigene30520_NAU-YH	1363	502	47	73	113.842	10.0596	14.3974	-3.50038	-2.98315	0.51723	Down	Down	Up	5.52e-101	1.99e-91	0.168158	-	-	GO:0046914//transition metal ion binding;GO:0015002//heme-copper terminal oxidase activity	GO:0006091//generation of precursor metabolites and energy	conserved hypothetical protein [Ricinus communis]	None
gi|156158938|gb|EW719084.1|EW719084	700	834	77	149	368.267	32.0903	57.2197	-3.52055	-2.68617	0.834376	Down	Down	Up	9.68e-169	8.83e-136	0.000258432	K02721|1|2e-39|160|ath:AT2G30570|photosystem II PsbW protein	GO:0009521;GO:0009534//chloroplast thylakoid	-	GO:0006996//organelle organization;GO:0042254//ribosome biogenesis;GO:0042548//regulation of photosynthesis, light reaction	component of 6.1 kDa polypeptide of photosystem II reaction center [Brassica rapa]	ath:AT2G30570	PSBW
Unigene9003_NAU-YH	757	693	63	128	282.965	24.2787	45.4539	-3.54286	-2.63815	0.904714	Down	Down	Up	6.15e-141	1.46e-110	0.000296198	K14332|1|2e-70|263|ath:AT1G08380|photosystem I subunit PsaO	GO:0009536//plastid;GO:0009521	-	GO:0030001//metal ion transport;GO:0006007//glucose catabolic process;GO:0006996//organelle organization;GO:0009765//photosynthesis, light harvesting;GO:0000097//sulfur amino acid biosynthetic process;GO:0006470//protein dephosphorylation;GO:0006873//cellular ion homeostasis;GO:0042254//ribosome biogenesis	photosystem I subunit O [Arabidopsis thaliana]	ath:AT1G08380	PSAO
Unigene267_NAU-YH	448	167	15	513	115.221	9.76773	62.404	-3.56024	-0.884699	2.67554	Down	Down	Up	4.43e-34	5.7e-06	1.06e-14	K12449|1|2e-29|125|ath:AT2G27860|UDP-apiose/xylose synthase	GO:0043231//intracellular membrane-bounded organelle;GO:0044444//cytoplasmic part;GO:0005576//extracellular region	GO:0016831//carboxy-lyase activity;GO:0048037//cofactor binding;GO:0000166//nucleotide binding	GO:0009165//nucleotide biosynthetic process	UDP-D-apiose/UDP-D-xylose synthase 1 [Arabidopsis thaliana]	ath:AT2G27860	AXS1
Unigene21251_NAU-YH	416	225	20	155	167.18	14.0255	100.16	-3.57528	-0.739091	2.83619	Down	Down	Up	4.65e-46	6.55e-06	3.39e-23	-	-	-	-	C3H4 type zinc finger protein [Arabidopsis thaliana]	ath:AT3G46620
Unigene22032_NAU-YH	323	150	13	513	143.544	11.7414	39.1158	-3.61181	-1.87566	1.73614	Down	Down	Up	5.36e-31	6.37e-16	0.000307833	-	-	-	-	-	None
gi|161571020|gb|EY942243.1|EY942243	844	312	27	513	114.263	9.33258	16.2437	-3.61394	-2.81441	0.799532	Down	Down	Up	1.84e-64	1.72e-53	0.0752444	-	-	-	-	zinc finger CCCH domain-containing protein 29 [Arabidopsis thaliana]	ath:AT2G40140	CZF1
gi|166138792|gb|FD572703.1|FD572703	871	417	36	44	147.983	12.0577	13.5797	-3.61741	-3.44591	0.171501	Down	Down	Up	2.93e-86	3.19e-87	0.73942	-	-	-	-	class I glutamine amidotransferase domain-containing protein [Arabidopsis thaliana]	ath:AT4G30530
CL8339.Contig2_NAU-YH	867	317	27	120	113.015	9.085	37.2065	-3.63688	-1.60288	2.034	Down	Down	Up	7.67e-66	1.26e-26	2.57e-12	K11982|1|2e-30|131|osa:4332849|E3 ubiquitin-protein ligase RNF115/126 [EC:6.3.2.19]	-	GO:0046872//metal ion binding	-	ABA- and drought-induced RING-DUF1117 protein [Arabidopsis thaliana]	ath:AT5G59550
CL3671.Contig2_NAU-YH	1029	1285	109	152	385.996	30.9024	39.7087	-3.6428	-3.28106	0.361737	Down	Down	Up	7.85e-268	3.53e-257	0.151631	K02638|1|2e-62|238|aly:ARALYDRAFT_472262|plastocyanin	GO:0009532//plastid stroma;GO:0009534//chloroplast thylakoid;GO:0044436	GO:0046914//transition metal ion binding	GO:0006470//protein dephosphorylation;GO:0009639//response to red or far red light;GO:0006996//organelle organization;GO:0009767//photosynthetic electron transport chain;GO:0055080//cation homeostasis;GO:0034285;GO:0006351//transcription, DNA-dependent;GO:0030001//metal ion transport;GO:0009642//response to light intensity;GO:0043479;GO:0006873//cellular ion homeostasis;GO:0042743//hydrogen perox…	DNA-damage resistance protein DRT112 [Arabidopsis thaliana]	ath:AT1G20340	DRT112
gi|166135491|gb|FD566102.1|FD566102	783	455	38	51	179.616	14.158	17.5092	-3.66522	-3.35873	0.306492	Down	Down	Up	3.6e-95	5.45e-93	0.569887	K01507|1|6e-47|185|aly:ARALYDRAFT_888959|inorganic pyrophosphatase [EC:3.6.1.1]	GO:0000325//plant-type vacuole;GO:0009526//plastid envelope;GO:0031090//organelle membrane	GO:0016462//pyrophosphatase activity;GO:0015405	GO:0048827//phyllome development;GO:0060918//auxin transport;GO:0006818//hydrogen transport;GO:0006970//response to osmotic stress;GO:0034220//ion transmembrane transport	pyrophosphate-energized vacuolar membrane proton pump [Eutrema salsugineum]	ath:AT1G78920	VP2
Unigene8281_NAU-YH	262	109	9	513	128.594	10.0212	19.4944	-3.68169	-2.72169	0.959997	Down	Down	Up	6.63e-23	3.16e-18	0.268627	-	-	-	-	-	None
CL2881.Contig1_NAU-YH	877	772	63	138	272.09	20.9566	42.2996	-3.69861	-2.68537	1.01324	Down	Down	Up	7.95e-163	1.2e-125	2.35e-05	K09286|1|7e-21|99.4|vvi:100264172|EREBP-like factor	-	-	GO:0006351//transcription, DNA-dependent;GO:0012501//programmed cell death;GO:0051707//response to other organism;GO:0009755//hormone-mediated signaling pathway;GO:0009628//response to abiotic stimulus;GO:0033554//cellular response to stress;GO:0045087//innate immune response;GO:0035556//intracellular signal transduction	putative ethylene-responsive element binding factor [Brassica rapa subsp. pekinensis]	ath:AT1G28370	ERF11
CL4288.Contig1_NAU-YH	1085	1134	90	140	323.056	24.1988	34.6861	-3.73878	-3.21936	0.519424	Down	Down	Up	1.94e-241	7.28e-223	0.0356472	K13413|1|2e-69|261|pop:POPTR_563479|mitogen-activated protein kinase kinase 4/5, plant [EC:2.7.12.2]	GO:0043231//intracellular membrane-bounded organelle	GO:0032550;GO:0004712//protein serine/threonine/tyrosine kinase activity;GO:0019887//protein kinase regulator activity	GO:0006351//transcription, DNA-dependent;GO:0006568//tryptophan metabolic process;GO:0031325//positive regulation of cellular metabolic process;GO:0080090//regulation of primary metabolic process;GO:0010243//response to organic nitrogen;GO:0002239//response to oomycetes;GO:0010604;GO:0009692;GO:0009700//indole phytoalexin biosynthetic process;GO:0006970//response to osmotic stress;GO:0006468//pro…	MAP kinase kinase 9 [Arabidopsis thaliana]	ath:AT1G73500	MKK9
gi|156153774|gb|EW713920.1|EW713920	818	665	51	546	251.283	18.1885	179.431	-3.78821	-0.485887	3.30233	Down	Down	Up	5.68e-143	5.93e-08	6.71e-95	-	-	-	-	hypothetical protein ARALYDRAFT_493483 [Arabidopsis lyrata subsp. lyrata]	ath:AT4G14270
CL4293.Contig2_NAU-YH	1506	510	39	102	104.674	7.55475	18.2067	-3.79238	-2.52336	1.26902	Down	Down	Up	1.09e-109	2.38e-77	1.26e-05	K07213|1|4e-07|54.7|ppp:PHYPADRAFT_187462|copper chaperone	-	-	GO:0010243//response to organic nitrogen	hypothetical protein ARALYDRAFT_908205 [Arabidopsis lyrata subsp. lyrata]	ath:AT5G03380
CL6047.Contig4_NAU-YH	2031	3390	258	941	515.923	37.0587	124.548	-3.79927	-2.05045	1.74882	Down	Down	Up	0	0	9.27e-78	K15172|1|4e-29|128|vcn:VOLCADRAFT_106802|transcription elongation factor SPT5	GO:0043231//intracellular membrane-bounded organelle	GO:0046914//transition metal ion binding;GO:0001071//nucleic acid binding transcription factor activity;GO:0097159//organic cyclic compound binding	GO:0006351//transcription, DNA-dependent;GO:0006984//ER-nucleus signaling pathway;GO:0009605//response to external stimulus;GO:0009642//response to light intensity;GO:0010243//response to organic nitrogen;GO:0016044//cellular membrane organization;GO:0006605//protein targeting;GO:0009692;GO:0002252;GO:0000160//two-component signal transduction system (phosphorelay);GO:0009626//plant-type hypersen…	zinc finger CCCH domain-containing protein 47 [Arabidopsis thaliana]	ath:AT3G55980	SZF1
Unigene22033_NAU-YH	287	173	13	513	186.32	13.2142	56.1987	-3.81762	-1.72917	2.08845	Down	Down	Up	2.32e-37	2.17e-16	1.46e-06	-	-	-	-	hypothetical protein ARALYDRAFT_911767 [Arabidopsis lyrata subsp. lyrata]	ath:AT4G05010
Unigene2094_NAU-YH	826	613	46	257	229.39	16.2464	83.6393	-3.81961	-1.45555	2.36406	Down	Down	Up	1.22e-132	2.31e-44	2.25e-31	-	-	-	-	-	None
gi|166138815|gb|FD572726.1|FD572726	747	321	24	55	132.825	9.37284	19.7924	-3.8249	-2.7465	1.07839	Down	Down	Up	1.88e-69	1.35e-53	0.010063	K09757|1|4e-83|305|ath:AT2G22990|serine carboxypeptidase-like 8 [EC:3.4.16.- 2.3.1.92];K09756|2|2e-65|246|ath:AT5G09640|serine carboxypeptidase-like 19 [EC:3.4.16.- 2.3.1.91];K13289|3|7e-58|221|mtr:MTR_4g021500|cathepsin A (carboxypeptidase C) [EC:3.4.16.5]	-	-	-	serine carboxypeptidase-like 7 [Arabidopsis thaliana]	ath:AT3G10450	SCPL7
gi|158926473|gb|EX898656.1|EX898656	796	529	38	153	205.418	13.9268	51.6697	-3.88262	-1.99117	1.89145	Down	Down	Up	6.59e-116	1.04e-59	3.14e-14	-	-	-	-	C2H2 zinc finger protein 1 [Brassica carinata]	ath:AT5G59820	RHL41
Unigene28426_NAU-YH	720	976	70	129	418.998	28.3626	48.1631	-3.88488	-3.12094	0.763938	Down	Down	Up	3.62e-214	4.43e-186	0.00221851	-	GO:0043231//intracellular membrane-bounded organelle;GO:0005911//cell-cell junction;GO:0044444//cytoplasmic part;GO:0016020//membrane	GO:0046914//transition metal ion binding	GO:0044267//cellular protein metabolic process;GO:0010243//response to organic nitrogen;GO:0009692;GO:0014070//response to organic cyclic compound;GO:0009755//hormone-mediated signaling pathway;GO:0006972//hyperosmotic response;GO:0050790//regulation of catalytic activity;GO:0009605//response to external stimulus	pinoid-binding protein 1 [Arabidopsis lyrata subsp. lyrata]	ath:AT5G54490	PBP1
CL8339.Contig1_NAU-YH	796	952	65	267	369.674	23.8221	90.1686	-3.95588	-2.03556	1.92032	Down	Down	Up	8.04e-212	1.6e-110	4.02e-25	K11982|1|3e-16|83.6|mtr:MTR_6g079660|E3 ubiquitin-protein ligase RNF115/126 [EC:6.3.2.19]	-	GO:0046914//transition metal ion binding	-	hypothetical protein ARALYDRAFT_496089 [Arabidopsis lyrata subsp. lyrata]	ath:AT5G59550
gi|156176535|gb|EW736681.1|EW736681	935	309	21	45	102.151	6.55222	12.9377	-3.96257	-2.98104	0.98153	Down	Down	Up	1.08e-68	2.95e-56	0.0403539	K14484|1|5e-103|372|aly:ARALYDRAFT_470401|auxin-responsive protein IAA	-	-	-	auxin-responsive protein IAA17 [Arabidopsis thaliana]	ath:AT1G04250	AXR3
gi|161539866|gb|EY912411.1|EY912411	725	297	20	132	126.623	8.04771	48.9433	-3.97582	-1.37136	2.60446	Down	Down	Up	3.49e-66	7.09e-20	4.5e-18	-	-	-	-	hypothetical protein ARALYDRAFT_473059 [Arabidopsis lyrata subsp. lyrata]	ath:AT1G28400
CL10526.Contig2_NAU-YH	918	527	34	121	177.445	10.8048	35.4323	-4.03762	-2.32423	1.71339	Down	Down	Up	6.28e-119	1.84e-72	6.05e-10	K02692|1|4e-106|382|aly:ARALYDRAFT_490280|photosystem I subunit II	GO:0009522//photosystem I;GO:0009570//chloroplast stroma;GO:0009534//chloroplast thylakoid;GO:0009526//plastid envelope	-	GO:0019684//photosynthesis, light reaction;GO:0030001//metal ion transport;GO:0006996//organelle organization;GO:0000097//sulfur amino acid biosynthetic process;GO:0006470//protein dephosphorylation;GO:0006873//cellular ion homeostasis;GO:0042254//ribosome biogenesis	hypothetical protein ARALYDRAFT_490280 [Arabidopsis lyrata subsp. lyrata]	ath:AT4G02770	PSAD-1
gi|332771266|gb|FY429541.1|FY429541	757	403	26	36	164.552	10.0198	12.7839	-4.03762	-3.68614	0.351479	Down	Down	Up	6.61e-91	2.46e-89	0.589244	-	-	-	-	-	None
gi|158945174|gb|EX907804.1|EX907804	622	234	15	20	116.284	7.03528	8.64364	-4.0469	-3.74987	0.297032	Down	Down	Up	8.16e-53	1.37e-52	0.709722	-	-	-	-	-	None
Unigene26045_NAU-YH	279	114	7	513	126.298	7.31938	24.0876	-4.10896	-2.39047	1.7185	Down	Down	Up	5.15e-26	1.75e-16	0.0161566	-	-	-	-	-	None
CL12741.Contig1_NAU-YH	1401	749	45	90	165.249	9.37033	17.2688	-4.1404	-3.2584	0.881994	Down	Down	Up	2.83e-172	7.54e-149	0.00436388	K11819|1|0.0|655|aly:ARALYDRAFT_480895|ROOTY/SUPERROOT1 [EC:4.4.1.-];K00815|3|2e-120|430|pop:POPTR_836654|tyrosine aminotransferase [EC:2.6.1.5]	GO:0044424//intracellular part	GO:0070547;GO:0016846//carbon-sulfur lyase activity;GO:0043168	GO:0048364//root development;GO:0006568//tryptophan metabolic process;GO:0009696//salicylic acid metabolic process;GO:0006732//coenzyme metabolic process;GO:0001558//regulation of cell growth;GO:0006007//glucose catabolic process;GO:0009755//hormone-mediated signaling pathway;GO:0006090//pyruvate metabolic process;GO:0018871;GO:0006972//hyperosmotic response;GO:0006753//nucleoside phosphate metab…	SUR1 [Brassica rapa subsp. rapa]	ath:AT2G20610	SUR1
CL522.Contig2_NAU-YH	1178	666	39	44	174.753	9.65828	10.0407	-4.1774	-4.12138	0.0560236	Down	Down	Up	4.17e-154	3.8e-161	0.939387	K11821|1|2e-147|520|ath:AT1G74100|desulfoglucosinolate sulfotransferase A/B/C [EC:2.8.2.-];K01014|3|8e-10|63.2|olu:OSTLU_32551|aryl sulfotransferase [EC:2.8.2.1]	-	GO:0047364//desulfoglucosinolate sulfotransferase activity	GO:0006568//tryptophan metabolic process;GO:0009755//hormone-mediated signaling pathway;GO:0009753//response to jasmonic acid stimulus;GO:0006972//hyperosmotic response;GO:0019758;GO:0009683;GO:0000097//sulfur amino acid biosynthetic process;GO:0006952//defense response	sulfotransferase 5b [Brassica rapa subsp. pekinensis]	ath:AT1G74090	SOT18
gi|158945813|gb|EX908608.1|EX908608	653	398	23	34	188.393	10.2753	13.9966	-4.19649	-3.7506	0.445895	Down	Down	Up	2.71e-92	1.71e-89	0.496921	K02693|1|4e-37|152|aly:ARALYDRAFT_491882|photosystem I subunit IV	-	-	-	hypothetical protein ARALYDRAFT_491882 [Arabidopsis lyrata subsp. lyrata]	ath:AT4G28750	PSAE-1
gi|156173284|gb|EW733430.1|EW733430	671	510	29	56	234.932	12.6083	22.4348	-4.2198	-3.38843	0.831368	Down	Down	Up	8.94e-119	4.42e-105	0.0487626	K02695|1|6e-53|205|ath:AT3G16140|photosystem I subunit VI	-	-	-	photosystem I reaction center subunit VI-1 [Arabidopsis thaliana]	ath:AT3G16140	PSAH-1
gi|166131854|gb|FD564041.1|FD564041	722	549	31	407	235.034	12.5258	151.536	-4.22989	-0.633211	3.59668	Down	Down	Up	4.28e-128	2.23e-10	3.71e-76	-	GO:0043231//intracellular membrane-bounded organelle	GO:0046914//transition metal ion binding;GO:0001071//nucleic acid binding transcription factor activity	GO:0009642//response to light intensity;GO:0009411//response to UV;GO:0051707//response to other organism;GO:0009694//jasmonic acid metabolic process;GO:0009725//response to hormone stimulus;GO:0010243//response to organic nitrogen;GO:0009409//response to cold;GO:0040007//growth;GO:0009408//response to heat;GO:0006972//hyperosmotic response;GO:0006351//transcription, DNA-dependent;GO:0006984//ER-…	C2H2 type zinc finger protein [Brassica rapa]	ath:AT5G59820	RHL41
CL10997.Contig2_NAU-YH	1340	896	50	247	206.68	10.8854	49.5506	-4.24693	-2.06042	2.18651	Down	Down	Up	7.41e-210	1.06e-105	1.91e-27	K03541|1|4e-63|240|ath:AT1G79040|photosystem II 10kDa protein	GO:0009523//photosystem II;GO:0009534//chloroplast thylakoid	GO:0046914//transition metal ion binding	GO:0009642//response to light intensity;GO:0000097//sulfur amino acid biosynthetic process;GO:0034285;GO:0010207//photosystem II assembly;GO:0015992//proton transport;GO:0009639//response to red or far red light	Photosystem II 10 kDa polypeptide, chloroplastic; Flags: Precursor	ath:AT1G79040	PSBR
Unigene6964_NAU-YH	814	1154	63	605	438.204	22.5786	199.797	-4.27858	-1.13307	3.14551	Down	Down	Up	8.77e-272	2.21e-56	1.68e-100	K11275|1|4e-34|143|ath:AT2G18050|histone H1/5	GO:0005694//chromosome	GO:0003677//DNA binding	GO:0006950//response to stress	histone H1-3 [Arabidopsis thaliana]	ath:AT2G18050	HIS1-3
CL10244.Contig1_NAU-YH	1661	1237	67	254	230.194	11.7675	41.1075	-4.28997	-2.48538	1.80459	Down	Down	Up	6.55e-292	2.85e-184	5.3e-22	K15015|1|2e-12|72.8|aly:ARALYDRAFT_486994|solute carrier family 32 (vesicular inhibitory amino acid transporter)	GO:0016021//integral to membrane	GO:0022804;GO:0015171//amino acid transmembrane transporter activity	GO:0006865//amino acid transport;GO:0009813//flavonoid biosynthetic process;GO:0030001//metal ion transport;GO:0006605//protein targeting;GO:0006970//response to osmotic stress;GO:0009746;GO:0009626//plant-type hypersensitive response;GO:0006873//cellular ion homeostasis;GO:0042044//fluid transport	amino acid permease [Brassica napus]	ath:AT5G09220	AAP2
CL4912.Contig1_NAU-YH	1131	1114	59	79	304.451	15.2184	18.7768	-4.32232	-4.01919	0.303132	Down	Down	Up	3.68e-264	8.8e-265	0.447282	K13248|1|7e-115|412|aly:ARALYDRAFT_889181|pyridoxal phosphate phosphatase PHOSPHO2 [EC:3.1.3.74]	-	-	-	hypothetical protein ARALYDRAFT_476431 [Arabidopsis lyrata subsp. lyrata]	ath:AT1G73010	PS2
gi|332783261|gb|FY440569.1|FY440569	853	1236	65	103	447.883	22.2303	32.4598	-4.33252	-3.7864	0.546127	Down	Down	Up	1.28e-293	1.87e-280	0.0676227	-	GO:0009536//plastid	-	GO:0009725//response to hormone stimulus;GO:0006873//cellular ion homeostasis;GO:0030001//metal ion transport	MHM17_10 [Arabidopsis lyrata subsp. lyrata]	ath:AT5G56980
CL7217.Contig1_NAU-YH	894	347	18	162	119.974	5.87375	48.7119	-4.35229	-1.30038	3.05192	Down	Down	Up	1.9e-82	2.35e-21	4.39e-26	-	-	-	-	hypothetical protein ARALYDRAFT_479112 [Arabidopsis lyrata subsp. lyrata]	ath:AT3G16510
Unigene25543_NAU-YH	339	195	10	513	177.799	8.60559	22.9962	-4.36883	-2.95078	1.41805	Down	Down	Up	2.24e-46	3.44e-35	0.0262384	-	GO:0043231//intracellular membrane-bounded organelle	-	GO:0009605//response to external stimulus;GO:0000160//two-component signal transduction system (phosphorelay);GO:0010243//response to organic nitrogen;GO:0002252;GO:0009408//response to heat	hypothetical protein [Arabidopsis thaliana]	ath:AT1G23710
Unigene22351_NAU-YH	1937	774	39	285	123.511	5.87375	39.5524	-4.39422	-1.64281	2.75141	Down	Down	Up	1.98e-185	7.4e-67	2.87e-41	K10526|1|0.0|993|aly:ARALYDRAFT_472278|OPC-8:0 CoA ligase 1 [EC:6.2.1.-]	GO:0042579//microbody;GO:0009536//plastid	GO:0016703;GO:0016405//CoA-ligase activity	GO:0009725//response to hormone stimulus;GO:0006725//cellular aromatic compound metabolic process;GO:0010243//response to organic nitrogen;GO:0006950//response to stress;GO:0009694//jasmonic acid metabolic process;GO:0051707//response to other organism	opc-8:0 CoA ligase1 [Arabidopsis lyrata subsp. lyrata]	ath:AT1G20510	OPCL1
Unigene26255_NAU-YH	529	360	18	57	210.35	9.92653	28.9652	-4.40536	-2.8604	1.54496	Down	Down	Up	3.14e-86	8.97e-63	0.000238046	-	-	-	-	-	None
Unigene13113_NAU-YH	903	1885	94	157	645.236	30.3683	46.7379	-4.40919	-3.78716	0.622026	Down	Down	Up	0	0	0.00555687	K00799|1|2e-64|243|vvi:100245065|glutathione S-transferase [EC:2.5.1.18]	GO:0044424//intracellular part	GO:0016765//transferase activity, transferring alkyl or aryl (other than methyl) groups	GO:0009414//response to water deprivation;GO:0009062//fatty acid catabolic process;GO:0035966//response to topologically incorrect protein;GO:0006511//ubiquitin-dependent protein catabolic process;GO:0014070//response to organic cyclic compound;GO:0006790//sulfur compound metabolic process;GO:0010038//response to metal ion;GO:0009247//glycolipid biosynthetic process;GO:0009404//toxin metabolic pr…	glutathione S-transferase 12 [Arabidopsis lyrata subsp. lyrata]	ath:AT1G27130	GSTU13
CL11101.Contig1_NAU-YH	1111	403	20	43	112.121	5.25166	10.4043	-4.41614	-3.42981	0.986331	Down	Down	Up	1.04e-96	6.11e-84	0.045975	-	-	GO:0005488//binding	GO:0042742//defense response to bacterium;GO:0010243//response to organic nitrogen;GO:0009642//response to light intensity;GO:0002252;GO:0007165//signal transduction;GO:0014070//response to organic cyclic compound;GO:0009692	HS1 PRO-1 2-like protein [Arabidopsis thaliana]	ath:AT2G40000	HSPRO2
Unigene30804_NAU-YH	242	121	6	513	154.549	7.23296	14.4406	-4.41733	-3.41986	0.997471	Down	Down	Up	5.68e-29	3.14e-25	0.371507	-	-	-	-	-	None
CL11101.Contig2_NAU-YH	1505	2866	137	676	588.619	26.5561	120.745	-4.47022	-2.28538	2.18484	Down	Down	Up	0	0	5.69e-75	-	-	GO:0005488//binding	GO:0042742//defense response to bacterium;GO:0010243//response to organic nitrogen;GO:0009642//response to light intensity;GO:0002252;GO:0007165//signal transduction;GO:0014070//response to organic cyclic compound;GO:0009692	hypothetical protein ARALYDRAFT_483040 [Arabidopsis lyrata subsp. lyrata]	ath:AT2G40000	HSPRO2
Unigene21400_NAU-YH	518	278	13	43	165.886	7.3214	22.3149	-4.50193	-2.89411	1.60782	Down	Down	Up	1.83e-67	4.29e-49	0.00135056	K13577|1|8e-40|160|ath:AT4G24570|solute carrier family 25 (mitochondrial dicarboxylate transporter), member 10;K15104|2|1e-39|160|aly:ARALYDRAFT_914130|solute carrier family 25 (mitochondrial oxoglutarate transporter), member 11	GO:0031224//intrinsic to membrane;GO:0019866//organelle inner membrane;GO:0005740//mitochondrial envelope	GO:0046943//carboxylic acid transmembrane transporter activity	GO:0044763;GO:0010243//response to organic nitrogen;GO:0009692;GO:0044765;GO:0006950//response to stress;GO:0009605//response to external stimulus	AT4G24570 [Arabidopsis thaliana]	ath:AT4G24570	DIC2
gi|161577960|gb|EY949273.1|EY949273	685	378	17	83	170.567	7.24	32.572	-4.55821	-2.38864	2.16957	Down	Down	Up	1.55e-92	9.16e-54	2.53e-09	-	-	-	-	hypothetical protein [Arabidopsis lyrata subsp. lyrata]	ath:AT5G02160
CL9211.Contig2_NAU-YH	1198	535	24	62	138.036	5.84433	13.9121	-4.56186	-3.31063	1.25123	Down	Down	Up	3.77e-131	6.82e-108	0.00136978	K11838|1|9e-14|76.3|gmx:100337654|ubiquitin carboxyl-terminal hydrolase 7 [EC:3.1.2.15]	GO:0005911//cell-cell junction;GO:0031224//intrinsic to membrane;GO:0009536//plastid	-	GO:0030001//metal ion transport	hypothetical protein ARALYDRAFT_489472 [Arabidopsis lyrata subsp. lyrata]	ath:AT5G26260
Unigene30434_NAU-YH	570	1039	46	383	563.424	23.5431	180.626	-4.58085	-1.64121	2.93963	Down	Down	Up	9.71e-256	1.46e-89	1.92e-59	-	-	-	-	hypothetical protein ARALYDRAFT_316611 [Arabidopsis lyrata subsp. lyrata]	ath:AT1G76955
Unigene2709_NAU-YH	296	188	8	513	196.318	7.88458	27.245	-4.63802	-2.84913	1.78888	Down	Down	Up	2.12e-46	9.85e-33	0.00512378	-	GO:0044424//intracellular part	GO:0032550	GO:0044248//cellular catabolic process;GO:0009626//plant-type hypersensitive response;GO:0009692;GO:0009627//systemic acquired resistance;GO:0006605//protein targeting;GO:0009608//response to symbiont;GO:0007165//signal transduction	TIR-NBS class of disease resistance protein [Arabidopsis thaliana]	ath:AT1G72950
Unigene28425_NAU-YH	728	1156	49	314	490.819	19.6356	115.946	-4.64364	-2.08174	2.56191	Down	Down	Up	5.7e-287	3.38e-138	4.75e-42	-	GO:0043231//intracellular membrane-bounded organelle;GO:0005911//cell-cell junction;GO:0044444//cytoplasmic part;GO:0016020//membrane	GO:0046914//transition metal ion binding	GO:0044267//cellular protein metabolic process;GO:0010243//response to organic nitrogen;GO:0009692;GO:0014070//response to organic cyclic compound;GO:0009755//hormone-mediated signaling pathway;GO:0006972//hyperosmotic response;GO:0050790//regulation of catalytic activity;GO:0009605//response to external stimulus	pinoid-binding protein 1 [Arabidopsis lyrata subsp. lyrata]	ath:AT4G27280
gnl|UG|Rsa#S42049332	1810	3014	122	1561	514.706	19.6635	231.836	-4.71015	-1.15064	3.55951	Down	Down	Up	0	1.21e-150	1.13e-290	K01188|1|4e-123|440|sbi:SORBI_06g019840|beta-glucosidase [EC:3.2.1.21]	-	GO:0016798//hydrolase activity, acting on glycosyl bonds	GO:0044238//primary metabolic process	myrosinase [Raphanus sativus]	ath:AT5G26000	TGG1
CL12734.Contig2_NAU-YH	1069	820	32	135	237.1	8.73278	33.9479	-4.76291	-2.8041	1.95881	Down	Down	Up	1.78e-206	6.16e-140	3.56e-13	K14484|1|4e-109|392|aly:ARALYDRAFT_319024|auxin-responsive protein IAA	GO:0043231//intracellular membrane-bounded organelle	GO:0005515//protein binding;GO:0001071//nucleic acid binding transcription factor activity	GO:0006351//transcription, DNA-dependent;GO:0043479;GO:0009414//response to water deprivation;GO:0005976//polysaccharide metabolic process;GO:0045229//external encapsulating structure organization;GO:0009755//hormone-mediated signaling pathway;GO:0032535//regulation of cellular component size;GO:0010101;GO:0009826//unidimensional cell growth;GO:0006970//response to osmotic stress;GO:0014070//resp…	auxin-responsive protein IAA7 [Arabidopsis thaliana]	ath:AT3G23050	IAA7
gi|158928165|gb|EX900251.1|EX900251	682	300	11	31	135.966	4.70532	12.219	-4.85282	-3.47606	1.37676	Down	Down	Up	4.09e-76	3.13e-63	0.0239478	-	-	-	-	hypothetical protein ARALYDRAFT_316075 [Arabidopsis lyrata subsp. lyrata]	ath:AT1G70870
gi|156158269|gb|EW718415.1|EW718415	874	293	10	13	103.622	3.33787	3.99843	-4.95626	-4.69575	0.260506	Down	Down	Up	3.43e-75	3.87e-77	0.801234	-	GO:0043231//intracellular membrane-bounded organelle	-	-	hypothetical protein ARALYDRAFT_907078 [Arabidopsis lyrata subsp. lyrata]	ath:AT3G56360
gi|332772103|gb|FY431527.1|FY431527	830	560	19	74	208.547	6.67815	23.9668	-4.96478	-3.12126	1.84352	Down	Down	Up	3.68e-144	9.83e-107	7.25e-07	K09286|1|1e-45|181|aly:ARALYDRAFT_897795|EREBP-like factor	GO:0044451//nucleoplasm part	GO:0001071//nucleic acid binding transcription factor activity;GO:0003676//nucleic acid binding	GO:0006351//transcription, DNA-dependent;GO:0010243//response to organic nitrogen;GO:0009873//ethylene mediated signaling pathway;GO:0002252;GO:0002218//activation of innate immune response	ethylene responsive element binding factor 4-like protein [Eutrema halophilum]	ath:AT3G15210	ERF4
CL2942.Contig2_NAU-YH	490	361	12	32	227.723	7.1444	17.5554	-4.99432	-3.69729	1.29703	Down	Down	Up	4.25e-93	3.22e-80	0.0290792	K15104|1|7e-61|230|aly:ARALYDRAFT_914130|solute carrier family 25 (mitochondrial oxoglutarate transporter), member 11;K13577|2|3e-60|228|ath:AT4G24570|solute carrier family 25 (mitochondrial dicarboxylate transporter), member 10	GO:0031224//intrinsic to membrane;GO:0019866//organelle inner membrane;GO:0005740//mitochondrial envelope	GO:0046943//carboxylic acid transmembrane transporter activity	GO:0044763;GO:0010243//response to organic nitrogen;GO:0009692;GO:0044765;GO:0006950//response to stress;GO:0009605//response to external stimulus	hypothetical protein ARALYDRAFT_914130 [Arabidopsis lyrata subsp. lyrata]	ath:AT4G24570	DIC2
gi|158643221|gb|EX753112.1|EX753112	709	331	11	26	144.303	4.52613	9.8579	-4.99468	-3.87168	1.123	Down	Down	Up	2.46e-85	2.51e-76	0.100765	-	-	-	-	hypothetical protein [Brassica rapa]	None
Unigene16542_NAU-YH	745	274	9	71	113.681	3.52425	25.6188	-5.01154	-2.14972	2.86182	Down	Down	Up	1.04e-70	2.75e-34	7.87e-11	K08900|1|9e-79|291|sbi:SORBI_09g030330|mitochondrial chaperone BCS1;K13120|3|1e-69|261|vvi:100263357|protein FAM32A	GO:0043231//intracellular membrane-bounded organelle;GO:0016020//membrane	GO:0017111//nucleoside-triphosphatase activity;GO:0032550	GO:0010243//response to organic nitrogen;GO:0009696//salicylic acid metabolic process;GO:0009814//defense response, incompatible interaction;GO:0009605//response to external stimulus	cytochrome BC1 synthesis [Arabidopsis thaliana]	ath:AT3G50930	BCS1
gi|158916387|gb|EX888089.1|EX888089	635	225	7	11	109.523	3.21592	4.65668	-5.08985	-4.55578	0.534071	Down	Down	Up	1.74e-58	4.06e-58	0.656055	K03541|1|2e-62|236|ath:AT1G79040|photosystem II 10kDa protein	GO:0009523//photosystem II;GO:0009534//chloroplast thylakoid	GO:0005488//binding	GO:0009642//response to light intensity;GO:0000097//sulfur amino acid biosynthetic process;GO:0034285;GO:0010207//photosystem II assembly;GO:0015992//proton transport;GO:0009639//response to red or far red light	photosystem II 10kDa polytpeptide [Brassica rapa]	ath:AT1G79040	PSBR
gi|332777840|gb|FY441043.1|FY441043	803	404	12	22	155.511	4.3596	7.36486	-5.15668	-4.40021	0.756463	Down	Down	Up	5.93e-106	3.42e-102	0.349191	K14638|1|8e-31|132|ppp:PHYPADRAFT_189464|solute carrier family 15 (peptide/histidine transporter), member 3/4	-	-	-	RecName: Full=Probable peptide/nitrate transporter At5g62680	ath:AT5G62680
Unigene8471_NAU-YH	201	70	2	513	107.646	2.90278	6.687	-5.21271	-4.00879	1.20392	Down	Down	Up	2.45e-18	1.1e-16	0.588557	-	-	-	-	-	None
gnl|UG|Rsa#S42049260	2338	1267	35	633	167.505	4.36721	72.7807	-5.26135	-1.20257	4.05877	Down	Down	Up	0	4.67e-68	2.48e-130	K09840|1|0.0|1009|aly:ARALYDRAFT_478868|9-cis-epoxycarotenoid dioxygenase [EC:1.13.11.51]	GO:0009532//plastid stroma;GO:0009534//chloroplast thylakoid	GO:0010436//carotenoid dioxygenase activity	GO:0009687//abscisic acid metabolic process;GO:0009725//response to hormone stimulus;GO:0006972//hyperosmotic response	9-cis-epoxycarotenoid dioxygenase [Raphanus sativus]	ath:AT3G14440	NCED3
gi|156169085|gb|EW729231.1|EW729231	787	263	7	11	103.294	2.5948	3.75729	-5.31499	-4.78092	0.534071	Down	Down	Up	7.38e-70	6.06e-70	0.656555	K14484|1|6e-44|116|aly:ARALYDRAFT_887587|auxin-responsive protein IAA	GO:0043231//intracellular membrane-bounded organelle	GO:0001071//nucleic acid binding transcription factor activity;GO:0005515//protein binding	GO:0014070//response to organic cyclic compound;GO:0009755//hormone-mediated signaling pathway;GO:0006351//transcription, DNA-dependent;GO:0048528//post-embryonic root development	indoleacetic acid-induced protein 2 [Arabidopsis lyrata subsp. lyrata]	ath:AT3G23030	IAA2
Unigene16160_NAU-YH	886	910	24	224	317.47	7.90238	67.9628	-5.32819	-2.2238	3.10439	Down	Down	Up	4.82e-243	2.2e-118	1.17e-36	-	GO:0043231//intracellular membrane-bounded organelle	-	GO:0034285;GO:0009746	dormancy-associated protein 1 [Brassica rapa subsp. pekinensis]	ath:AT1G28330	DYL1
gi|158945854|gb|EX908649.1|EX908649	850	623	16	33	226.55	5.49138	10.4364	-5.36652	-4.44013	0.926388	Down	Down	Up	8.65e-167	1.18e-158	0.115877	K11838|1|8e-11|65.9|rcu:RCOM_0423090|ubiquitin carboxyl-terminal hydrolase 7 [EC:3.1.2.15]	-	-	-	TRAF-like family protein [Arabidopsis thaliana]	ath:AT5G26260
CL2792.Contig3_NAU-YH	1347	803	20	100	184.265	4.33155	19.9567	-5.41076	-3.20683	2.20392	Down	Down	Up	6.3e-216	3.49e-157	2.25e-11	K01051|1|3e-107|387|vvi:100255703|pectinesterase [EC:3.1.1.11]	GO:0005618//cell wall;GO:0043231//intracellular membrane-bounded organelle	GO:0030234//enzyme regulator activity;GO:0052689	GO:0071555//cell wall organization;GO:0000272//polysaccharide catabolic process;GO:0044092//negative regulation of molecular function	pectinesterase 35 [Arabidopsis thaliana]	ath:AT3G59010	PME61
gi|161570660|gb|EY942315.1|EY942315	805	284	7	47	109.048	2.53678	15.6949	-5.42582	-2.79659	2.62923	Down	Down	Up	3.54e-76	2.31e-48	1.07e-06	-	-	-	-	sulfate transporter [Brassica napus]	ath:AT5G13550	SULTR4;1
Unigene14276_NAU-YH	363	125	3	513	106.438	2.41099	11.8487	-5.46425	-3.16722	2.29703	Down	Down	Up	1.7e-33	2.73e-24	0.0241054	-	GO:0005911//cell-cell junction;GO:0016020//membrane	GO:0032550;GO:0033218//amide binding;GO:0038023//signaling receptor activity;GO:0004672//protein kinase activity;GO:0009975//cyclase activity	GO:0010243//response to organic nitrogen;GO:0009755//hormone-mediated signaling pathway;GO:0009886//post-embryonic morphogenesis;GO:0007167//enzyme linked receptor protein signaling pathway;GO:0009607//response to biotic stimulus;GO:0006464//cellular protein modification process;GO:0002376//immune system process;GO:0000160//two-component signal transduction system (phosphorelay);GO:0048437//flora…	PEP1 receptor 2 [Arabidopsis thaliana]	ath:AT1G17750	PEPR2
CL4249.Contig1_NAU-YH	524	215	5	50	126.824	2.78368	25.6505	-5.50969	-2.30577	3.20392	Down	Down	Up	5.5e-58	2.01e-29	1.5e-08	K12581|1|2e-42|169|sbi:SORBI_04g035960|CCR4-NOT transcription complex subunit 7/8	GO:0043231//intracellular membrane-bounded organelle	GO:0016787//hydrolase activity;GO:0097159//organic cyclic compound binding	-	RecName: Full=Probable CCR4-associated factor 1 homolog 11	ath:AT5G22250
gi|332791052|gb|FY449485.1|FY449485	556	190	4	513	105.627	2.09877	4.83484	-5.65328	-4.44936	1.20392	Down	Down	Up	9.27e-52	2.49e-48	0.365167	K00640|1|7e-69|257|aly:ARALYDRAFT_474662|serine O-acetyltransferase [EC:2.3.1.30]	-	-	-	chloroplast serine acetyltransferase [Thlaspi goesingense]	ath:AT1G55920	SERAT2;1
CL6590.Contig2_NAU-YH	265	297	6	78	346.422	6.6052	79.1236	-5.71278	-2.13035	3.58243	Down	Down	Up	1.88e-81	1.03e-36	1.57e-14	-	-	-	-	-	None
Unigene21825_NAU-YH	789	8977	174	677	3516.81	64.3358	230.658	-5.7725	-3.93044	1.84206	Down	Down	Up	0	0	4.44e-60	-	GO:0043231//intracellular membrane-bounded organelle;GO:0044444//cytoplasmic part	GO:0046914//transition metal ion binding	GO:0010038//response to metal ion;GO:0009267//cellular response to starvation;GO:0000041//transition metal ion transport;GO:0014070//response to organic cyclic compound;GO:0015698//inorganic anion transport;GO:0006721//terpenoid metabolic process;GO:0003006//developmental process involved in reproduction	hypothetical protein ARALYDRAFT_322644 [Arabidopsis lyrata subsp. lyrata]	ath:AT2G01520	MLP328
Unigene13505_NAU-YH	408	155	3	513	117.427	2.14507	28.9901	-5.77459	-2.01813	3.75646	Down	Down	Up	1.6e-42	4.46e-18	1.44e-08	-	-	-	-	-	None
Unigene6199_NAU-YH	649	220	4	67	104.779	1.79803	27.7516	-5.86479	-1.9167	3.94808	Down	Down	Up	7.57e-61	8.5e-24	1.9e-13	-	GO:0009536//plastid	-	GO:0009690//cytokinin metabolic process	hypothetical protein ARALYDRAFT_494551 [Arabidopsis lyrata subsp. lyrata]	ath:AT5G44350
CL10553.Contig1_NAU-YH	468	287	5	31	189.553	3.11677	17.8063	-5.92641	-3.41214	2.51426	Down	Down	Up	8.23e-80	1.7e-59	0.000224526	-	GO:0043231//intracellular membrane-bounded organelle	-	-	hypothetical protein [Arabidopsis thaliana]	ath:AT4G27657
CL4249.Contig5_NAU-YH	897	584	10	61	201.24	3.25228	18.2808	-5.95132	-3.46052	2.4908	Down	Down	Up	3.57e-163	1.22e-122	4.16e-08	K12581|1|5e-75|279|ppp:PHYPADRAFT_185698|CCR4-NOT transcription complex subunit 7/8	GO:0043231//intracellular membrane-bounded organelle	GO:0097159//organic cyclic compound binding;GO:0000175//3'-5'-exoribonuclease activity	-	hypothetical protein ARALYDRAFT_484842 [Arabidopsis lyrata subsp. lyrata]	ath:AT3G44260
Unigene23768_NAU-YH	1329	1428	24	61	332.122	5.26825	12.3385	-5.97825	-4.75048	1.22777	Down	Down	Up	0	0	0.00185777	K00815|1|2e-171|600|aly:ARALYDRAFT_493655|tyrosine aminotransferase [EC:2.6.1.5]	GO:0044444//cytoplasmic part	GO:0043168;GO:0070547;GO:0016846//carbon-sulfur lyase activity	GO:0006558//L-phenylalanine metabolic process;GO:0009058//biosynthetic process;GO:0006570//tyrosine metabolic process;GO:0018871	hypothetical protein ARALYDRAFT_493655 [Arabidopsis lyrata subsp. lyrata]	ath:AT5G36160
CL11668.Contig2_NAU-YH	2047	2730	45	843	412.23	6.41321	110.705	-6.00626	-1.89673	4.10953	Down	Down	Up	0	2.63e-288	2.69e-175	K14861|1|2e-13|76.3|gmx:100777901|nucleolar pre-ribosomal-associated protein 1	GO:0044464//cell part;GO:0016020//membrane	-	GO:0009605//response to external stimulus;GO:0000160//two-component signal transduction system (phosphorelay);GO:0010243//response to organic nitrogen	hypothetical protein [Arabidopsis thaliana]	ath:AT4G29780
CL12947.Contig1_NAU-YH	1077	1180	19	60	338.658	5.14658	14.9759	-6.04007	-4.49911	1.54096	Down	Down	Up	0	1.3e-303	0.000155594	K01179|1|3e-97|353|osa:4335944|endoglucanase [EC:3.2.1.4]	GO:0005911//cell-cell junction;GO:0016020//membrane;GO:0044444//cytoplasmic part;GO:0005618//cell wall;GO:0043231//intracellular membrane-bounded organelle	GO:0016798//hydrolase activity, acting on glycosyl bonds	GO:0044238//primary metabolic process	glycosyl hydrolase family 9 protein [Arabidopsis lyrata subsp. lyrata]	ath:AT1G71380	CEL3
gi|166112248|gb|FD544252.1|FD544252	747	320	5	67	132.411	1.95267	24.1108	-6.08343	-2.45727	3.62616	Down	Down	Up	7.01e-90	4.29e-47	1.27e-12	K13449|1|3e-54|209|rcu:RCOM_1381930|pathogenesis-related protein 1	-	-	-	AT4g33720 [Arabidopsis thaliana]	ath:AT4G33720
CL4249.Contig4_NAU-YH	921	1121	17	79	376.219	5.3848	23.0582	-6.12654	-4.02822	2.09831	Down	Down	Up	0	6.87e-267	1.51e-08	K12581|1|5e-59|226|ppp:PHYPADRAFT_185698|CCR4-NOT transcription complex subunit 7/8	GO:0043231//intracellular membrane-bounded organelle	GO:0097159//organic cyclic compound binding;GO:0000175//3'-5'-exoribonuclease activity	-	RecName: Full=Probable CCR4-associated factor 1 homolog 11	ath:AT5G22250
CL6074.Contig1_NAU-YH	598	332	5	32	171.606	2.43921	14.3849	-6.13654	-3.57647	2.56007	Down	Down	Up	1.51e-93	9.8e-72	0.000140192	-	-	-	-	-	None
gi|167479632|gb|FD964364.1|FD964364	675	374	5	332	171.263	2.16096	132.218	-6.30839	-0.373289	5.93511	Down	Down	Up	2.1e-106	0.00301429	1.51e-83	K13195|1|9e-17|85.1|pop:POPTR_712972|cold-inducible RNA-binding protein;K13201|3|8e-07|52.0|aly:ARALYDRAFT_474538|nucleolysin TIA-1/TIAR;K02965|5|1e-06|51.6|ath:AT5G47320|small subunit ribosomal protein S19	GO:0031981//nuclear lumen;GO:0005911//cell-cell junction;GO:0009536//plastid;GO:0016020//membrane;GO:0042579//microbody;GO:0005576//extracellular region;GO:0030312//external encapsulating structure	GO:0048037//cofactor binding;GO:0032550;GO:0016620//oxidoreductase activity, acting on the aldehyde or oxo group of donors, NAD or NADP as acceptor;GO:0004672//protein kinase activity;GO:0003676//nucleic acid binding;GO:0042802//identical protein binding	GO:0010243//response to organic nitrogen;GO:0006605//protein targeting;GO:0006970//response to osmotic stress;GO:0006631//fatty acid metabolic process;GO:0016129;GO:0010038//response to metal ion;GO:0006464//cellular protein modification process;GO:0009699//phenylpropanoid biosynthetic process;GO:0000398//mRNA splicing, via spliceosome;GO:0009725//response to hormone stimulus;GO:0006952//defense …	hypothetical protein ARALYDRAFT_490700 [Arabidopsis lyrata subsp. lyrata]	ath:AT4G39260	CCR1
CL13457.Contig2_NAU-YH	216	83	1	513	118.773	1.3506	11.2007	-6.45847	-3.40655	3.05192	Down	Down	Up	1.64e-23	2.41e-17	0.0698761	K00924|1|2e-10|62.4|aly:ARALYDRAFT_476729|[EC:2.7.1.-];K13430|5|4e-09|57.8|zma:100283091|serine/threonine-protein kinase PBS1 [EC:2.7.11.1]	GO:0005911//cell-cell junction;GO:0031224//intrinsic to membrane	GO:0032550;GO:0033218//amide binding;GO:0038023//signaling receptor activity;GO:0004672//protein kinase activity;GO:0009975//cyclase activity	GO:0010243//response to organic nitrogen;GO:0009755//hormone-mediated signaling pathway;GO:0009886//post-embryonic morphogenesis;GO:0006796//phosphate-containing compound metabolic process;GO:0007167//enzyme linked receptor protein signaling pathway;GO:0009607//response to biotic stimulus;GO:0006464//cellular protein modification process;GO:0002376//immune system process;GO:0000160//two-component…	hypothetical protein ARALYDRAFT_471987 [Arabidopsis lyrata subsp. lyrata]	ath:AT1G17750	PEPR2
CL3497.Contig1_NAU-YH	798	1156	13	153	447.765	4.75249	51.5402	-6.55791	-3.11897	3.43894	Down	Down	Up	0	2.78e-220	1.76e-27	-	GO:0009536//plastid	-	-	hypothetical protein ARALYDRAFT_488600 [Arabidopsis lyrata subsp. lyrata]	ath:AT5G17350
CL5270.Contig1_NAU-YH	944	630	7	24	206.283	2.16325	6.83434	-6.57528	-4.91568	1.6596	Down	Down	Up	6.31e-182	1.38e-170	0.023381	K09286|1|2e-43|174|pop:POPTR_588763|EREBP-like factor	GO:0043231//intracellular membrane-bounded organelle	GO:0003676//nucleic acid binding;GO:0001071//nucleic acid binding transcription factor activity	GO:0006952//defense response;GO:0010243//response to organic nitrogen;GO:0009692;GO:0050794//regulation of cellular process;GO:0006351//transcription, DNA-dependent;GO:0009605//response to external stimulus	hypothetical protein ARALYDRAFT_496327 [Arabidopsis lyrata subsp. lyrata]	ath:AT5G61600	ERF104
gi|167446176|gb|FD950660.1|FD950660	784	594	6	170	234.188	2.23262	58.2895	-6.71278	-2.00636	4.70642	Down	Down	Up	1.75e-172	1.05e-67	3.09e-38	K13448|1|2e-64|243|aly:ARALYDRAFT_476823|calcium-binding protein CML	GO:0043231//intracellular membrane-bounded organelle;GO:0016020//membrane	GO:0046872//metal ion binding	GO:0000160//two-component signal transduction system (phosphorelay);GO:0051707//response to other organism;GO:0009694//jasmonic acid metabolic process;GO:0010243//response to organic nitrogen;GO:0000302//response to reactive oxygen species;GO:0009755//hormone-mediated signaling pathway	calcium-binding protein CML38 [Arabidopsis thaliana]	ath:AT1G76650	CML38
Unigene4821_NAU-YH	772	416	4	14	166.56	1.51155	4.87492	-6.78387	-5.09452	1.68935	Down	Down	Up	6.27e-121	1.11e-114	0.109432	-	-	-	-	-	None
gi|167450038|gb|FD954103.1|FD954103	293	108	1	513	113.933	0.995664	37.6161	-6.83832	-1.59877	5.23955	Down	Down	Up	3.94e-31	2.09e-09	1.18e-09	-	-	-	-	-	None
gi|332778043|gb|FY442450.1|FY442450	782	332	3	20	131.228	1.11917	6.87512	-6.87351	-4.25455	2.61896	Down	Down	Up	1.04e-96	4.65e-82	0.00407715	-	GO:0009536//plastid	-	-	hypothetical protein ARALYDRAFT_488600 [Arabidopsis lyrata subsp. lyrata]	ath:AT5G17350
gi|166141490|gb|FD574861.1|FD574861	796	455	4	78	176.682	1.46598	26.3414	-6.91315	-2.74575	4.1674	Down	Down	Up	5.77e-133	6.58e-76	3.12e-16	-	GO:0043231//intracellular membrane-bounded organelle;GO:0016020//membrane	-	-	hypothetical protein ARALYDRAFT_491758 [Arabidopsis lyrata subsp. lyrata]	ath:AT4G29960
CL1297.Contig1_NAU-YH	890	455	4	16	158.022	1.31114	4.83267	-6.91315	-5.03116	1.88199	Down	Down	Up	5.78e-133	1.19e-124	0.0535161	K14484|1|6e-55|212|aly:ARALYDRAFT_887587|auxin-responsive protein IAA	GO:0043231//intracellular membrane-bounded organelle	GO:0001071//nucleic acid binding transcription factor activity;GO:0005515//protein binding	GO:0014070//response to organic cyclic compound;GO:0009755//hormone-mediated signaling pathway;GO:0006351//transcription, DNA-dependent;GO:0048528//post-embryonic root development	indoleacetic acid-induced protein 2 [Arabidopsis lyrata subsp. lyrata]	ath:AT3G23030	IAA2
CL6167.Contig1_NAU-YH	978	1384	12	53	437.413	3.5795	14.5678	-6.93309	-4.90814	2.02495	Down	Down	Up	0	0	1.19e-05	-	GO:0043231//intracellular membrane-bounded organelle	-	GO:0009267//cellular response to starvation;GO:0015698//inorganic anion transport;GO:0010647//positive regulation of cell communication;GO:0006351//transcription, DNA-dependent;GO:0009247//glycolipid biosynthetic process	SPX domain-containing protein [Arabidopsis lyrata subsp. lyrata]	ath:AT5G20150	SPX1
gi|167480254|gb|FD965166.1|FD965166	730	3716	32	77	1573.43	12.7881	28.3547	-6.94296	-5.79418	1.14878	Down	Down	Up	0	0	0.000753916	-	-	-	-	hypothetical protein ARALYDRAFT_899336 [Arabidopsis lyrata subsp. lyrata]	None
Unigene30593_NAU-YH	608	566	4	95	287.745	1.91927	42.0027	-7.22809	-2.77624	4.45185	Down	Down	Up	2.66e-167	1.49e-95	1.3e-20	-	GO:0043231//intracellular membrane-bounded organelle	-	GO:0044767	hypothetical protein ARALYDRAFT_332982 [Arabidopsis lyrata subsp. lyrata]	ath:AT4G13395	RTFL12
gnl|UG|Rsa#S58749289	892	294	2	5	101.877	0.654102	1.50682	-7.2831	-6.07918	1.20392	Down	Down	Up	1.06e-86	2.21e-87	0.585674	K09264|1|1e-10|65.1|sbi:SORBI_03g002525|MADS-box transcription factor, plant	-	-	-	flowering locus C [Raphanus sativus]	ath:AT5G10140	FLC
Unigene30443_NAU-YH	763	452	3	455	183.109	1.14704	160.304	-7.31864	-0.19189	7.12675	Down	Down	Up	8.5e-134	0.12026	5.7e-121	-	-	-	-	-	None
CL4731.Contig3_NAU-YH	647	312	2	15	149.055	0.901792	6.23224	-7.36883	-4.57995	2.78888	Down	Down	Up	2.8e-92	6.49e-81	0.0135752	K13448|1|4e-13|72.8|ath:AT3G47480|calcium-binding protein CML	-	GO:0046872//metal ion binding	-	calcium-binding EF hand family protein [Arabidopsis lyrata subsp. lyrata]	ath:AT5G39670
Unigene11928_NAU-YH	834	482	3	4	178.639	1.04939	1.28929	-7.41135	-7.11432	0.297032	Down	Down	Up	4.27e-143	2.88e-150	0.903957	K12154|1|1e-140|497|aly:ARALYDRAFT_889032|cytochrome P450, family 79, subfamily F, polypeptide 1 [EC:1.14.13.-];K12155|3|2e-137|486|ath:AT1G16400|cytochrome P450, family 79, subfamily F, polypeptide 2 [EC:1.14.13.-];K13027|4|2e-57|220|sbi:SORBI_01g001200|tyrosine N-monooxygenase [EC:1.14.13.41];K11813|5|5e-56|216|ath:AT2G22330|cytochrome P450, family 79, subfamily B, polypeptide 3 (tryptophan N-m…	GO:0009536//plastid	GO:0046906//tetrapyrrole binding;GO:0046914//transition metal ion binding;GO:0004497//monooxygenase activity	GO:0019758;GO:0051707//response to other organism	CYP79F1 [Brassica oleracea]	ath:AT1G16410	CYP79F1
gi|158921226|gb|EX893334.1|EX893334	805	809	5	9	310.633	1.81198	3.00541	-7.4215	-6.6915	0.729991	Down	Down	Up	8.55e-241	9.04e-249	0.635729	-	-	-	-	senescence-related protein [Arabidopsis thaliana]	ath:AT3G02040	SRG3
CL13416.Contig1_NAU-YH	1013	330	2	345	100.693	0.575972	91.5518	-7.44975	-0.137304	7.31245	Down	Down	Up	7.64e-98	0.384484	5.28e-92	-	-	-	-	-	None
Unigene12764_NAU-YH	1508	830	5	444	170.126	0.967273	79.1478	-7.45847	-1.10399	6.35448	Down	Down	Up	2.61e-247	5.68e-39	1.52e-114	-	-	-	-	-	None
gi|167482186|gb|FD969078.1|FD969078	728	535	3	4	227.152	1.20218	1.47702	-7.56186	-7.26483	0.297032	Down	Down	Up	1.55e-159	1.17e-167	0.906885	K00454|1|2e-60|230|ath:AT3G45140|lipoxygenase [EC:1.13.11.12]	GO:0009532//plastid stroma;GO:0009534//chloroplast thylakoid;GO:0009526//plastid envelope	GO:0046914//transition metal ion binding;GO:0016702//oxidoreductase activity, acting on single donors with incorporation of molecular oxygen, incorporation of two atoms of oxygen	GO:0016109;GO:0006732//coenzyme metabolic process;GO:0009414//response to water deprivation;GO:0006779//porphyrin-containing compound biosynthetic process;GO:0051707//response to other organism;GO:0006090//pyruvate metabolic process;GO:0005984//disaccharide metabolic process;GO:0006753//nucleoside phosphate metabolic process;GO:0006633//fatty acid biosynthetic process;GO:0006996//organelle organi…	lipoxygenase 2 [Brassica napus]	ath:AT3G45140	LOX2
Unigene6048_NAU-YH	466	376	2	251	249.4	1.25206	144.792	-7.63802	-0.784479	6.85354	Down	Down	Up	4.28e-112	2.32e-10	8.82e-66	-	-	-	-	-	None
gi|154100024|gb|EV532997.1|EV532997	552	585	3	152	327.576	1.58549	74.0221	-7.69076	-2.1458	5.54496	Down	Down	Up	4.6e-175	8.95e-73	5.35e-37	-	-	-	-	-	None
Unigene6047_NAU-YH	864	631	3	626	225.741	1.01295	194.768	-7.79996	-0.212911	7.58705	Down	Down	Up	2.38e-189	0.0324601	6.82e-169	-	-	-	-	-	None
CL11708.Contig1_NAU-YH	484	219	1	9	139.86	0.602747	4.99867	-7.85822	-4.8063	3.05192	Down	Down	Up	2.6e-65	2.17e-58	0.0699609	-	-	-	-	-	None
gi|166149859|gb|FD582667.1|FD582667	626	233	1	11	115.047	0.466022	4.72363	-7.94761	-4.60619	3.34143	Down	Down	Up	1.19e-69	1.36e-60	0.0275512	-	-	-	GO:0006952//defense response	hypothetical protein ARALYDRAFT_476631 [Arabidopsis lyrata subsp. lyrata]	ath:AT1G74930	ORA47
CL9096.Contig2_NAU-YH	1457	493	2	255	104.588	0.400452	47.0476	-8.02887	-1.15252	6.87635	Down	Down	Up	1.99e-148	5.62e-25	6.92e-67	K07975|1|1e-60|232|ath:AT2G44690|Rho family, other;K04392|2|1e-52|205|gmx:100798550|Ras-related C3 botulinum toxin substrate 1	GO:0016020//membrane;GO:0044464//cell part	GO:0032550;GO:0004620//phospholipase activity	GO:0007015//actin filament organization;GO:0000904//cell morphogenesis involved in differentiation;GO:0045184//establishment of protein localization;GO:0009154//purine ribonucleotide catabolic process;GO:0035556//intracellular signal transduction	hypothetical protein ARALYDRAFT_322132 [Arabidopsis lyrata subsp. lyrata]	ath:AT2G44690	ARAC9
Unigene21422_NAU-YH	931	1003	4	125	333.001	1.2534	36.0925	-8.05353	-3.20576	4.84778	Down	Down	Up	2.98e-303	2.73e-196	1.63e-28	K09286|1|6e-20|96.3|aly:ARALYDRAFT_470149|EREBP-like factor	GO:0043231//intracellular membrane-bounded organelle	GO:0003676//nucleic acid binding;GO:0001071//nucleic acid binding transcription factor activity	GO:0006952//defense response;GO:0006351//transcription, DNA-dependent	hypothetical protein ARALYDRAFT_476631 [Arabidopsis lyrata subsp. lyrata]	ath:AT1G74930	ORA47
gi|154263744|gb|EV574715.1|EV574715	800	286	1	9	110.502	0.364662	3.02419	-8.2433	-5.19138	3.05192	Down	Down	Up	4.28e-86	1.64e-79	0.0699794	K01058|1|2e-06|51.2|mtr:MTR_7g081620|phospholipase A1 [EC:3.1.1.32]	GO:0009536//plastid	GO:0016298//lipase activity	GO:0044238//primary metabolic process	triacylglycerol lipase-like 1 protein [Arabidopsis thaliana]	ath:AT1G45201	TLL1
CL7293.Contig1_NAU-YH	1292	868	3	5	207.66	0.677391	1.04031	-8.26002	-7.64106	0.61896	Down	Down	Up	4.02e-263	2.95e-275	0.730204	-	GO:0043231//intracellular membrane-bounded organelle	-	GO:0009414//response to water deprivation;GO:0009725//response to hormone stimulus;GO:0006970//response to osmotic stress	BURP domain-containing protein [Brassica napus]	ath:AT5G25610	RD22
gi|158946132|gb|EX908779.1|EX908779	869	291	1	2	103.507	0.335707	0.618682	-8.2683	-7.38631	0.881994	Down	Down	Up	1.2e-87	3.29e-91	0.793188	K13691|1|5e-69|259|vvi:100242294|pathogen-inducible salicylic acid glucosyltransferase [EC:2.4.1.-]	GO:0009536//plastid	GO:0035251//UDP-glucosyltransferase activity	GO:0034614//cellular response to reactive oxygen species;GO:0009414//response to water deprivation;GO:0009850//auxin metabolic process;GO:0032787//monocarboxylic acid metabolic process;GO:0042538//hyperosmotic salinity response;GO:1901360;GO:0014070//response to organic cyclic compound;GO:0009737//response to abscisic acid stimulus;GO:0009404//toxin metabolic process;GO:0019758;GO:0006725//cellul…	UDP-glucosyl transferase 74c1 [Brassica rapa subsp. pekinensis]	ath:AT2G31790
Unigene14359_NAU-YH	1074	646	2	15	185.919	0.543258	3.75443	-8.41882	-5.62993	2.78888	Down	Down	Up	4.71e-196	6.89e-187	0.0135813	-	GO:0031224//intrinsic to membrane	GO:0015103//inorganic anion transmembrane transporter activity;GO:0015291//secondary active transmembrane transporter activity	GO:0000097//sulfur amino acid biosynthetic process;GO:0009683;GO:0015698//inorganic anion transport;GO:0006873//cellular ion homeostasis;GO:0019758;GO:0030001//metal ion transport	plasma membrane sulphate transporter [Brassica oleracea var. acephala]	ath:AT5G10180	SULTR2;1
CL3444.Contig1_NAU-YH	583	330	1	11	174.961	0.500394	5.07202	-8.44975	-5.10832	3.34143	Down	Down	Up	9.12e-100	4.85e-91	0.0275403	-	-	-	GO:0006952//defense response;GO:0010243//response to organic nitrogen;GO:0009692;GO:0007165//signal transduction;GO:0002252;GO:0006351//transcription, DNA-dependent	ethylene-responsive transcription factor ERF109 [Arabidopsis thaliana]	ath:AT4G34410	RRTF1
gi|161574554|gb|EY945434.1|EY945434	834	424	1	102	157.143	0.349796	32.8769	-8.81135	-2.25693	6.55442	Down	Down	Up	5.01e-129	2.96e-56	4e-26	-	-	GO:0001071//nucleic acid binding transcription factor activity;GO:0005515//protein binding	GO:0009725//response to hormone stimulus	basic helix-loop-helix domain-containing protein [Arabidopsis thaliana]	ath:AT1G05710
Unigene23294_NAU-YH	666	580	1	2	269.184	0.438032	0.807259	-9.26334	-8.38134	0.881994	Down	Down	Up	1.12e-177	2.52e-186	0.78871	K00928|1|2e-116|416|ath:AT3G02020|aspartate kinase [EC:2.7.2.4]	GO:0009532//plastid stroma	GO:0031406//carboxylic acid binding;GO:0016774//phosphotransferase activity, carboxyl group as acceptor	GO:0009085//lysine biosynthetic process;GO:0006796//phosphate-containing compound metabolic process	aspartokinase 3 [Arabidopsis thaliana]	ath:AT3G02020	AK3
gi|161537468|gb|EY909491.1|EY909491	793	594	1	2	231.53	0.367881	0.677975	-9.29775	-8.41575	0.881994	Down	Down	Up	4.83e-182	6.18e-191	0.797954	K12154|1|2e-80|296|ath:AT1G16410|cytochrome P450, family 79, subfamily F, polypeptide 1 [EC:1.14.13.-];K12155|3|7e-77|285|ath:AT1G16400|cytochrome P450, family 79, subfamily F, polypeptide 2 [EC:1.14.13.-];K13027|4|8e-42|168|sbi:SORBI_01g001200|tyrosine N-monooxygenase [EC:1.14.13.41];K12153|5|4e-39|159|vvi:100246526|cytochrome P450, family 79, subfamily A, polypeptide 2 (phenylalanine N-monooxyg…	GO:0009536//plastid	GO:0046906//tetrapyrrole binding;GO:0046914//transition metal ion binding;GO:0004497//monooxygenase activity	GO:0019758;GO:0051707//response to other organism	cytochrome P450 79f1 [Brassica rapa subsp. pekinensis]	ath:AT1G16410	CYP79F1
CL3785.Contig2_NAU-YH	1103	1193	2	3	334.318	0.528975	0.731144	-9.30381	-8.83685	0.466957	Down	Down	Up	0	0	0.861752	K15741|1|5e-168|588|aly:ARALYDRAFT_910306|methylthioalkylmalate synthase 1 [EC:2.3.3.-];K15742|3|9e-165|577|aly:ARALYDRAFT_910307|methylthioalkylmalate synthase 3 [EC:2.3.3.-];K01649|5|4e-126|449|rcu:RCOM_1267040|2-isopropylmalate synthase [EC:2.3.3.13]	GO:0009536//plastid	GO:0046912//transferase activity, transferring acyl groups, acyl groups converted into alkyl on transfer	GO:0051707//response to other organism;GO:0000097//sulfur amino acid biosynthetic process;GO:0009683;GO:0019758;GO:0006950//response to stress	2-isopropylmalate synthase [Brassica oleracea]	ath:AT5G23010	MAM1
gi|332785211|gb|FY442152.1|FY442152	750	1240	2	85	511.04	0.777946	30.466	-9.35955	-4.06817	5.29139	Down	Down	Up	0	1.91e-297	3.63e-20	K13422|1|6e-75|278|ath:AT1G32640|transcription factor MYC2	-	-	-	MYC [Brassica oleracea var. gemmifera]	ath:AT1G32640	MYC2
gi|167486983|gb|FD972688.1|FD972688	686	855	1	3	385.245	0.425262	1.17559	-9.82321	-8.35625	1.46696	Down	Down	Up	1.43e-263	5.36e-275	0.679926	-	GO:0005576//extracellular region;GO:0030312//external encapsulating structure	-	GO:0010876//lipid localization;GO:0051234//establishment of localization;GO:0009725//response to hormone stimulus;GO:0006972//hyperosmotic response	lipid transfer protein 4-like protein [Eutrema halophilum]	ath:AT5G59310	LTP4
gi|167506254|gb|FD987530.1|FD987530	684	1861	1	4	840.979	0.426505	1.57203	-10.9453	-9.0633	1.88199	Down	Down	Up	0	0	0.496277	-	GO:0005576//extracellular region;GO:0030312//external encapsulating structure	-	GO:0010876//lipid localization;GO:0051234//establishment of localization;GO:0009725//response to hormone stimulus;GO:0006972//hyperosmotic response	nonspecific lipid-transfer protein precursor [Brassica napus]	ath:AT5G59310	LTP4
gi|161540400|gb|EY911788.1|EY911788	741	251	0	2	104.701	0.01	0.725553	-13.354	-7.17298	6.18101	Down	Down	Up	2.49e-77	4.12e-78	0.526305	-	-	-	-	myrosinase-binding protein-like protein [Arabidopsis thaliana]	ath:AT2G39310	JAL22
gi|167480867|gb|FD963379.1|FD963379	661	229	0	1	107.085	0.01	0.406683	-13.3865	-8.04064	5.34583	Down	Down	Up	1.8e-70	1.05e-72	0.718472	-	-	-	-	hypothetical protein ARALYDRAFT_472406 [Arabidopsis lyrata subsp. lyrata]	ath:AT1G21680
gi|158928699|gb|EX901651.1|EX901651	832	307	0	1	114.054	0.01	0.323098	-13.4774	-8.46353	5.0139	Down	Down	Up	8.27e-95	2.31e-98	0.729539	K00052|1|8e-109|391|ath:AT1G31180|3-isopropylmalate dehydrogenase [EC:1.1.1.85]	GO:0009532//plastid stroma;GO:0009526//plastid envelope	GO:0046872//metal ion binding;GO:0016616//oxidoreductase activity, acting on the CH-OH group of donors, NAD or NADP as acceptor;GO:0000166//nucleotide binding	GO:0006551//leucine metabolic process;GO:0006743//ubiquinone metabolic process;GO:0008652//cellular amino acid biosynthetic process;GO:0006970//response to osmotic stress;GO:0019758	3-isopropylmalate dehydrogenase 1 [Arabidopsis thaliana]	ath:AT1G31180	IMD3
Unigene13943_NAU-YH	817	304	0	1	115.013	0.01	0.32903	-13.4895	-8.44936	5.04015	Down	Down	Up	7.14e-94	2.24e-97	0.725663	-	-	-	-	-	None
gi|166150953|gb|FD582018.1|FD582018	883	343	0	1	120.068	0.01	0.304436	-13.5516	-8.6235	4.92807	Down	Down	Up	4.72e-106	3.16e-110	0.716485	K08145|1|1e-40|165|ppp:PHYPADRAFT_187073|MFS transporter, SP family, solute carrier family 2 (facilitated glucose transporter), member 8	GO:0031224//intrinsic to membrane;GO:0000325//plant-type vacuole	GO:0005402//cation:sugar symporter activity	GO:0010035//response to inorganic substance;GO:0051707//response to other organism;GO:0044763;GO:0009725//response to hormone stimulus;GO:0006970//response to osmotic stress;GO:0015698//inorganic anion transport;GO:0008643//carbohydrate transport	sugar transporter ERD6-like 17 [Arabidopsis thaliana]	ath:AT5G27350	SFP1
Unigene9051_NAU-YH	305	125	0	513	126.679	0.01	63.4585	-13.6289	-0.997293	12.6316	Down	Down	Up	4.03e-38	1.6e-05	1.89e-19	K09757|1|5e-15|77.4|ath:AT2G22990|serine carboxypeptidase-like 8 [EC:3.4.16.- 2.3.1.92];K09756|2|3e-11|64.7|ath:AT5G09640|serine carboxypeptidase-like 19 [EC:3.4.16.- 2.3.1.91];K13289|3|3e-08|54.7|mtr:MTR_4g021500|cathepsin A (carboxypeptidase C) [EC:3.4.16.5]	GO:0005618//cell wall	GO:0004180//carboxypeptidase activity;GO:0016753	GO:0000097//sulfur amino acid biosynthetic process;GO:0009683;GO:0006633//fatty acid biosynthetic process;GO:0009694//jasmonic acid metabolic process;GO:0006544//glycine metabolic process;GO:0006090//pyruvate metabolic process;GO:0019538//protein metabolic process;GO:0006753//nucleoside phosphate metabolic process;GO:0006732//coenzyme metabolic process	serine carboxypeptidase-like 12 [Arabidopsis thaliana]	ath:AT2G22920	SCPL12
gi|161562200|gb|EY933880.1|EY933880	244	102	0	513	129.213	0.01	1.10171	-13.6575	-6.87386	6.7836	Down	Down	Up	5.25e-31	3.23e-31	0.726333	-	-	-	-	-	None
gi|332787970|gb|FY445372.1|FY445372	873	372	0	3	131.711	0.01	0.923771	-13.6851	-7.15563	6.52946	Down	Down	Up	4.14e-115	5.62e-116	0.351343	K00454|1|5e-136|481|aly:ARALYDRAFT_476385|lipoxygenase [EC:1.13.11.12]	-	-	-	hypothetical protein ARALYDRAFT_476385 [Arabidopsis lyrata subsp. lyrata]	ath:AT1G72520
Unigene22670_NAU-YH	360	161	0	513	138.235	0.01	66.4576	-13.7548	-1.05662	12.6982	Down	Down	Up	2.65e-49	1.58e-07	3.57e-24	-	-	-	-	-	None
Unigene32894_NAU-YH	216	97	0	513	138.807	0.01	1.24452	-13.7608	-6.80135	6.95945	Down	Down	Up	1.86e-29	1.33e-29	0.739765	-	-	-	GO:0009683;GO:0006568//tryptophan metabolic process	hypothetical protein [Arabidopsis thaliana]	ath:AT1G49500
Unigene30452_NAU-YH	305	146	0	513	147.961	0.01	0.881368	-13.8529	-7.39126	6.46167	Down	Down	Up	1.23e-44	1.65e-45	0.728163	-	GO:0005618//cell wall	-	GO:0009725//response to hormone stimulus;GO:0014070//response to organic cyclic compound	predicted protein [Arabidopsis lyrata subsp. lyrata]	ath:AT3G20470	GRP5
gi|156165584|gb|EW725730.1|EW725730	668	343	0	3	158.713	0.01	1.20726	-13.9541	-7.03854	6.9156	Down	Down	Up	4.73e-106	1.75e-106	0.351129	-	-	-	-	putative lipid transfer protein 5 [Eutrema halophilum]	ath:AT3G51600	LTP5
Unigene31076_NAU-YH	243	128	0	513	162.817	0.01	35.3998	-13.991	-2.20143	11.7895	Down	Down	Up	4.75e-39	9.96e-17	1.76e-08	K13422|1|7e-16|80.1|aly:ARALYDRAFT_890840|transcription factor MYC2	GO:0043231//intracellular membrane-bounded organelle	GO:0005515//protein binding;GO:0003676//nucleic acid binding	GO:0009813//flavonoid biosynthetic process;GO:0009414//response to water deprivation;GO:0010243//response to organic nitrogen;GO:0051707//response to other organism;GO:0006355//regulation of transcription, DNA-dependent;GO:0009755//hormone-mediated signaling pathway;GO:0006605//protein targeting;GO:0002831;GO:0009626//plant-type hypersensitive response;GO:0034599//cellular response to oxidative s…	ATMYC2 [Arabidopsis lyrata subsp. lyrata]	ath:AT1G32640	MYC2
gi|166147672|gb|FD578516.1|FD578516	610	357	0	47	180.898	0.01	20.7122	-14.1429	-3.12663	11.0163	Down	Down	Up	2.03e-110	3.67e-68	1.45e-12	K09286|1|3e-19|92.8|aly:ARALYDRAFT_470149|EREBP-like factor	GO:0043231//intracellular membrane-bounded organelle	GO:0003676//nucleic acid binding;GO:0001071//nucleic acid binding transcription factor activity	GO:0006952//defense response;GO:0010243//response to organic nitrogen;GO:0006351//transcription, DNA-dependent	hypothetical protein ARALYDRAFT_476631 [Arabidopsis lyrata subsp. lyrata]	ath:AT1G74930	ORA47
Unigene11626_NAU-YH	204	128	0	513	193.943	0.01	25.0369	-14.2433	-2.95351	11.2898	Down	Down	Up	4.75e-39	3.19e-23	4.94e-05	K13422|1|3e-18|88.2|ath:AT1G32640|transcription factor MYC2	GO:0043231//intracellular membrane-bounded organelle	GO:0005515//protein binding;GO:0001071//nucleic acid binding transcription factor activity;GO:0003676//nucleic acid binding	GO:0009813//flavonoid biosynthetic process;GO:0009414//response to water deprivation;GO:0010243//response to organic nitrogen;GO:0051707//response to other organism;GO:0006355//regulation of transcription, DNA-dependent;GO:0009755//hormone-mediated signaling pathway;GO:0006605//protein targeting;GO:0002831;GO:0009626//plant-type hypersensitive response;GO:0034599//cellular response to oxidative s…	transcription factor MYC2, partial [Brassica napus]	ath:AT1G32640	MYC2
gi|161531503|gb|EY903412.1|EY903412	523	350	0	1	206.853	0.01	0.513991	-14.3363	-8.65265	5.68367	Down	Down	Up	3.1e-108	1.56e-112	0.729877	K15741|1|7e-17|84.7|aly:ARALYDRAFT_910306|methylthioalkylmalate synthase 1 [EC:2.3.3.-];K15742|2|2e-15|79.7|ath:AT5G23020|methylthioalkylmalate synthase 3 [EC:2.3.3.-];K01649|5|2e-10|63.2|rcu:RCOM_1267040|2-isopropylmalate synthase [EC:2.3.3.13]	GO:0009536//plastid	GO:0046912//transferase activity, transferring acyl groups, acyl groups converted into alkyl on transfer	GO:0051707//response to other organism;GO:0000097//sulfur amino acid biosynthetic process;GO:0009683;GO:0006551//leucine metabolic process;GO:0019758;GO:0006950//response to stress	2-isopropylmalate synthase, A genome specific 4 [Brassica juncea]	ath:AT5G23020	IMS2
gi|156177420|gb|EW737566.1|EW737566	856	653	0	3	235.795	0.01	0.942117	-14.5252	-7.96741	6.55783	Down	Down	Up	5.63e-203	2.34e-208	0.349338	K00826|1|8e-93|338|aly:ARALYDRAFT_898360|branched-chain amino acid aminotransferase [EC:2.6.1.42]	-	-	-	branched-chain aminotransferase 4 [Brassica rapa subsp. pekinensis]	ath:AT3G19710	BCAT4
Unigene18630_NAU-YH	916	732	0	218	247.008	0.01	63.9762	-14.5923	-1.94895	12.6433	Down	Down	Up	1.09e-227	3.1e-80	2.47e-60	-	-	-	-	-	None
Unigene31259_NAU-YH	1008	1115	0	171	341.908	0.01	45.6029	-15.0613	-2.90641	12.1549	Down	Down	Up	0	1.03e-197	4.06e-47	-	-	-	-	-	None
Unigene14290_NAU-YH	550	619	0	38	347.875	0.01	18.5728	-15.0863	-4.2273	10.859	Down	Down	Up	2.42e-192	1.75e-152	4.17e-10	K14517|1|2e-17|86.7|ath:AT5G47220|ethylene-responsive transcription factor 2;K09286|2|2e-16|83.6|ath:AT4G17500|EREBP-like factor	-	-	-	hypothetical protein ARALYDRAFT_912253 [Arabidopsis lyrata subsp. lyrata]	ath:AT2G44840	ERF13
Unigene11627_NAU-YH	344	398	0	52	357.618	0.01	40.6352	-15.1261	-3.13762	11.9885	Down	Down	Up	3.16e-123	2.97e-76	6.13e-14	K13422|1|5e-38|153|aly:ARALYDRAFT_890840|transcription factor MYC2	GO:0043231//intracellular membrane-bounded organelle	GO:0005515//protein binding;GO:0001071//nucleic acid binding transcription factor activity;GO:0003676//nucleic acid binding	GO:0009813//flavonoid biosynthetic process;GO:0009414//response to water deprivation;GO:0010243//response to organic nitrogen;GO:0051707//response to other organism;GO:0006355//regulation of transcription, DNA-dependent;GO:0009755//hormone-mediated signaling pathway;GO:0006605//protein targeting;GO:0002831;GO:0009626//plant-type hypersensitive response;GO:0034599//cellular response to oxidative s…	MYC [Brassica oleracea var. gemmifera]	ath:AT1G32640	MYC2
Unigene34331_NAU-YH	457	646	0	4	436.929	0.01	2.35289	-15.4151	-7.53682	7.87829	Down	Down	Up	8.8e-201	4.09e-204	0.224669	K00454|1|3e-85|311|aly:ARALYDRAFT_476385|lipoxygenase [EC:1.13.11.12]	-	GO:0046914//transition metal ion binding;GO:0016702//oxidoreductase activity, acting on single donors with incorporation of molecular oxygen, incorporation of two atoms of oxygen	GO:0009642//response to light intensity;GO:0051707//response to other organism;GO:0006633//fatty acid biosynthetic process;GO:0055114//oxidation-reduction process;GO:0009694//jasmonic acid metabolic process;GO:0009725//response to hormone stimulus;GO:0010243//response to organic nitrogen;GO:0048229//gametophyte development;GO:0009692;GO:0003006//developmental process involved in reproduction;GO:0…	hypothetical protein ARALYDRAFT_476385 [Arabidopsis lyrata subsp. lyrata]	ath:AT1G72520
Unigene31906_NAU-YH	358	123	0	513	106.198	0.01	0.01	-13.3745	-13.3745	0	Down	Down	unchanged	1.67e-37	7.96e-40		-	GO:0016020//membrane	-	GO:0009719;GO:0009628//response to abiotic stimulus;GO:0071310//cellular response to organic substance;GO:0007165//signal transduction;GO:0006950//response to stress	hypothetical protein [Arabidopsis thaliana]	ath:AT2G26530	AR781
Unigene18138_NAU-YH	514	180	0	513	108.244	0.01	0.01	-13.402	-13.402	0	Down	Down	unchanged	3.24e-55	1.33e-58		-	-	-	GO:0009267//cellular response to starvation;GO:0006791//sulfur utilization	male sterility MS5 family protein [Arabidopsis lyrata subsp. lyrata]	ath:AT5G48850	ATSDI1
gi|167491930|gb|FD977047.1|FD977047	799	280	0	513	108.319	0.01	0.01	-13.403	-13.403	0	Down	Down	unchanged	2.21e-86	1.21e-91		K00860|1|7e-86|315|ath:AT4G39940|adenylylsulfate kinase [EC:2.7.1.25]	GO:0009536//plastid	GO:0016301//kinase activity;GO:0032550;GO:0016628//oxidoreductase activity, acting on the CH-CH group of donors, NAD or NADP as acceptor	GO:0006568//tryptophan metabolic process;GO:0010675;GO:0006796//phosphate-containing compound metabolic process;GO:0019758;GO:0007276//gamete generation;GO:0009683;GO:0006952//defense response	Adenylyl-sulfate kinase 2 [Arabidopsis thaliana]	ath:AT4G39940	AKN2
gi|167480820|gb|FD964082.1|FD964082	776	280	0	513	111.53	0.01	0.01	-13.4451	-13.4451	0	Down	Down	unchanged	2.22e-86	1.21e-91		-	-	-	-	hypothetical protein ARALYDRAFT_492500 [Arabidopsis lyrata subsp. lyrata]	ath:AT4G23680
Unigene13942_NAU-YH	391	144	0	513	113.836	0.01	0.01	-13.4747	-13.4747	0	Down	Down	unchanged	5.11e-44	9.83e-47		-	-	-	-	-	None
gi|161552772|gb|EY924748.1|EY924748	356	134	0	513	116.346	0.01	0.01	-13.5061	-13.5061	0	Down	Down	unchanged	6.54e-41	1.95e-43		-	-	-	-	-	None
Unigene31102_NAU-YH	1055	402	0	513	117.779	0.01	0.01	-13.5238	-13.5238	0	Down	Down	unchanged	1.79e-124	5.06e-132		-	-	-	-	-	None
Unigene4929_NAU-YH	295	123	0	513	128.878	0.01	0.01	-13.6537	-13.6537	0	Down	Down	unchanged	1.67e-37	7.95e-40		K00928|1|6e-12|67.0|aly:ARALYDRAFT_896038|aspartate kinase [EC:2.7.2.4]	GO:0009532//plastid stroma	GO:0016774//phosphotransferase activity, carboxyl group as acceptor	GO:0008652//cellular amino acid biosynthetic process	aspartokinase 3 [Arabidopsis thaliana]	ath:AT3G02020	AK3
gi|332789854|gb|FY448963.1|FY448963	540	254	0	513	145.39	0.01	0.01	-13.8276	-13.8276	0	Down	Down	unchanged	2.9e-78	4.77e-83		K00454|1|1e-92|336|ath:AT1G17420|lipoxygenase [EC:1.13.11.12]	-	GO:0046914//transition metal ion binding;GO:0016702//oxidoreductase activity, acting on single donors with incorporation of molecular oxygen, incorporation of two atoms of oxygen	GO:0009642//response to light intensity;GO:0051707//response to other organism;GO:0006633//fatty acid biosynthetic process;GO:0055114//oxidation-reduction process;GO:0009694//jasmonic acid metabolic process;GO:0009725//response to hormone stimulus;GO:0010243//response to organic nitrogen;GO:0048229//gametophyte development;GO:0009692;GO:0003006//developmental process involved in reproduction;GO:0…	lipoxygenase [Arabidopsis thaliana]	ath:AT1G17420	LOX3
CL3519.Contig1_NAU-YH	213	107	0	513	155.274	0.01	0.01	-13.9225	-13.9225	0	Down	Down	unchanged	1.51e-32	1.42e-34		K01590|1|4e-36|147|ath:AT1G43710|histidine decarboxylase [EC:4.1.1.22]	GO:0044444//cytoplasmic part;GO:0016020//membrane	GO:0016831//carboxy-lyase activity;GO:0043168	GO:0042439//ethanolamine-containing compound metabolic process;GO:0003006//developmental process involved in reproduction;GO:0019752//carboxylic acid metabolic process	serine decarboxylase [Arabidopsis thaliana]	ath:AT1G43710	emb1075
gi|158927312|gb|EX899344.1|EX899344	819	421	0	513	158.889	0.01	0.01	-13.9557	-13.9557	0	Down	Down	unchanged	2.02e-130	2.63e-138		-	-	-	-	endoribonuclease L-PSP family protein [Arabidopsis lyrata subsp. lyrata]	ath:AT3G20390
CL4651.Contig1_NAU-YH	250	129	0	513	159.494	0.01	0.01	-13.9612	-13.9612	0	Down	Down	unchanged	2.33e-39	8.52e-42		-	-	-	GO:0009683;GO:0009626//plant-type hypersensitive response;GO:0009813//flavonoid biosynthetic process;GO:0006568//tryptophan metabolic process;GO:0006605//protein targeting	hypothetical protein [Arabidopsis thaliana]	ath:AT3G19030
gi|167496097|gb|FD980882.1|FD980882	583	324	0	513	171.779	0.01	0.01	-14.0683	-14.0683	0	Down	Down	unchanged	4.07e-100	3.39e-106		K01802|1|1e-43|173|rcu:RCOM_0608620|peptidylprolyl isomerase [EC:5.2.1.8]	GO:0005911//cell-cell junction;GO:0016020//membrane;GO:0009536//plastid	GO:0016859//cis-trans isomerase activity	GO:0018208//peptidyl-proline modification;GO:0007154//cell communication	clophilin, partial [Brassica napus]	ath:AT4G34870	ROC5
CL1563.Contig9_NAU-YH	248	179	0	513	223.098	0.01	0.01	-14.4454	-14.4454	0	Down	Down	unchanged	6.64e-55	2.84e-58		-	-	-	-	-	None
gi|158915623|gb|EX888592.1|EX888592	663	857	0	513	399.542	0.01	0.01	-15.2861	-15.2861	0	Down	Down	unchanged	7.84e-267	7.39e-283		-	GO:0005576//extracellular region;GO:0030312//external encapsulating structure	GO:0005488//binding	GO:0010876//lipid localization;GO:0051234//establishment of localization;GO:0009725//response to hormone stimulus;GO:0006972//hyperosmotic response	hypothetical protein ARALYDRAFT_496059 [Arabidopsis lyrata subsp. lyrata]	ath:AT5G59320	LTP3
Unigene5154_NAU-YH	410	743	0	513	560.144	0.01	0.01	-15.7735	-15.7735	0	Down	Down	unchanged	3.94e-231	4.82e-245		K00928|1|5e-11|64.3|aly:ARALYDRAFT_896038|aspartate kinase [EC:2.7.2.4]	GO:0009536//plastid	GO:0031406//carboxylic acid binding;GO:0016774//phosphotransferase activity, carboxyl group as acceptor	GO:0008652//cellular amino acid biosynthetic process;GO:0006796//phosphate-containing compound metabolic process	hypothetical protein ARALYDRAFT_896038 [Arabidopsis lyrata subsp. lyrata]	ath:AT3G02020	AK3
CL10072.Contig1_NAU-YH	873	586	612	8	207.481	204.511	2.46339	-0.0207971	-6.39619	-6.37539	Down	Down	Down	0.873513	1.23e-177	7.05e-178	-	-	-	-	-	None
Unigene30386_NAU-YH	734	910	919	176	383.213	365.258	64.4575	-0.0692298	-2.57173	-2.5025	Down	Down	Down	0.511089	5.03e-141	4.85e-133	-	-	-	GO:0006950//response to stress;GO:0009699//phenylpropanoid biosynthetic process	hypothetical protein ARALYDRAFT_480959 [Arabidopsis lyrata subsp. lyrata]	ath:AT2G21100
Unigene8024_NAU-YH	887	441	425	1	153.677	139.78	0.303063	-0.136744	-8.98607	-8.84932	Down	Down	Down	0.342334	1.47e-142	1.88e-131	-	-	-	-	-	None
CL9212.Contig1_NAU-YH	828	1107	1045	147	413.249	368.185	47.7248	-0.16658	-3.1142	-2.94762	Down	Down	Down	0.0306393	1.27e-210	3.43e-181	-	GO:0009526//plastid envelope;GO:0016020//membrane	GO:0005488//binding;GO:0016787//hydrolase activity	GO:0015698//inorganic anion transport;GO:0010876//lipid localization;GO:0019538//protein metabolic process;GO:0010035//response to inorganic substance	bifunctional inhibitorlipid-transfer proteinseed storage 2S albumin-like protein [Arab	ath:AT3G22620
gi|158641959|gb|EX751850.1|EX751850	798	270	249	31	104.582	91.0284	10.4428	-0.200242	-3.32405	-3.12381	Down	Down	Down	0.26429	1.17e-54	1.26e-45	K10999|1|4e-87|319|aly:ARALYDRAFT_496689|cellulose synthase A [EC:2.4.1.12]	GO:0043231//intracellular membrane-bounded organelle;GO:0031224//intrinsic to membrane;GO:0043234//protein complex	GO:0046914//transition metal ion binding;GO:0016759//cellulose synthase activity	GO:0043479;GO:0030243//cellulose metabolic process;GO:0010191;GO:0065008;GO:0003006//developmental process involved in reproduction;GO:0009826//unidimensional cell growth;GO:0030865//cortical cytoskeleton organization;GO:0048588//developmental cell growth;GO:0009832//plant-type cell wall biogenesis;GO:0071555//cell wall organization	cellulose synthase 6.1 catalytic subunit [Brassica napus]	ath:AT5G64740	CESA6
Unigene12998_NAU-YH	1428	25337	22639	97	5484.31	4624.98	18.26	-0.245864	-8.23048	-7.98462	Down	Down	Down	1.7e-75	0	0	-	GO:0044444//cytoplasmic part	-	GO:0010035//response to inorganic substance;GO:0010101;GO:0009850//auxin metabolic process	protein IAA-LEUCINE RESISTANT 2 [Arabidopsis thaliana]	ath:AT3G18485	ILR2
Unigene5905_NAU-YH	358	122	109	513	105.335	88.8227	0.01	-0.245981	-13.3627	-13.1167	Down	Down	Down	0.393644	1.7e-39	1.36e-33	-	-	-	-	-	None
CL10152.Contig1_NAU-YH	793	302	266	32	117.714	97.8563	10.8476	-0.26655	-3.43984	-3.17329	Down	Down	Down	0.0905353	4.6e-63	1.71e-49	K14207|1|9e-41|165|sbi:SORBI_10g024790|solute carrier family 38 (sodium-coupled neutral amino acid transporter), member 2	GO:0031224//intrinsic to membrane;GO:0031090//organelle membrane	GO:0046943//carboxylic acid transmembrane transporter activity	GO:0009746;GO:0046474//glycerophospholipid biosynthetic process;GO:0046942//carboxylic acid transport;GO:0034285	amino acid transporter family protein [Arabidopsis lyrata subsp. lyrata]	ath:AT3G56200
gi|166131224|gb|FD562571.1|FD562571	714	2052	1800	516	888.329	735.453	194.271	-0.272462	-2.19302	-1.92056	Down	Down	Down	6.61e-08	2.44e-262	9.37e-187	-	-	-	-	-	None
Unigene15921_NAU-YH	1355	646	553	165	147.363	119.06	32.7342	-0.307683	-2.1705	-1.86282	Down	Down	Down	0.00146514	1.57e-81	5.52e-55	K01501|1|8e-158|555|ath:AT3G44300|nitrilase [EC:3.5.5.1];K13035|4|2e-125|447|aly:ARALYDRAFT_662033|beta-cyano-L-alanine hydratase/nitrilase [EC:3.5.5.1 3.5.5.4]	GO:0009536//plastid;GO:0005911//cell-cell junction;GO:0005576//extracellular region;GO:0016020//membrane	GO:0018822//nitrile hydratase activity;GO:0000257//nitrilase activity	GO:0051707//response to other organism;GO:0009683;GO:0010038//response to metal ion;GO:0009267//cellular response to starvation;GO:0019759	nitrilase-like protein [Brassica napus]	ath:AT3G44300	NIT2
gi|167505589|gb|FD986805.1|FD986805	623	351	299	94	174.146	140.011	40.5599	-0.314754	-2.10217	-1.78742	Down	Down	Down	0.0237545	1.34e-42	3.78e-28	-	-	-	-	-	None
CL10006.Contig1_NAU-YH	928	307	261	80	102.255	82.0489	23.1739	-0.317617	-2.1416	-1.82398	Down	Down	Down	0.035729	3.4e-38	2.71e-25	K08967|1|8e-110|394|aly:ARALYDRAFT_915377|1,2-dihydroxy-3-keto-5-methylthiopentene dioxygenase [EC:1.13.11.53 1.13.11.54]	GO:0043231//intracellular membrane-bounded organelle;GO:0044444//cytoplasmic part	GO:0046914//transition metal ion binding;GO:0016702//oxidoreductase activity, acting on single donors with incorporation of molecular oxygen, incorporation of two atoms of oxygen	GO:0050794//regulation of cellular process;GO:0044710	ARD-like protein [Brassica juncea]	ath:AT4G14710	ATARD2
Unigene5944_NAU-YH	860	1174	987	214	421.953	334.811	66.8917	-0.333739	-2.65718	-2.32345	Down	Down	Down	9.5e-07	7.56e-189	8.97e-131	-	-	-	-	-	None
gi|161547238|gb|EY918927.1|EY918927	661	234	191	55	109.423	84.2971	22.3675	-0.376364	-2.29044	-1.91407	Down	Down	Down	0.0303364	9.84e-32	8.14e-20	-	-	-	-	-	None
Unigene23215_NAU-YH	450	203	162	33	139.437	105.023	19.7133	-0.408914	-2.82238	-2.41346	Down	Down	Down	0.0289768	5.73e-35	1.65e-22	-	GO:0043231//intracellular membrane-bounded organelle	GO:0001071//nucleic acid binding transcription factor activity;GO:0005515//protein binding	GO:0006351//transcription, DNA-dependent	transcription factor bHLH62 [Arabidopsis thaliana]	ath:AT3G07340
Unigene6027_NAU-YH	837	293	230	40	108.202	80.1646	12.8467	-0.432695	-3.07426	-2.64157	Down	Down	Down	0.00370638	4.96e-55	2.26e-35	-	-	-	-	-	None
Unigene30400_NAU-YH	1082	1759	1369	272	502.497	369.111	67.577	-0.445061	-2.89451	-2.44945	Down	Down	Down	2.36e-16	0	2.2e-193	-	-	-	-	-	None
gi|156159548|gb|EW719694.1|EW719694	111	61	47	513	169.864	123.525	0.01	-0.459577	-14.0521	-13.5925	Down	Down	Down	0.247281	1.49e-19	3.23e-14	-	-	-	-	-	None
Unigene2141_NAU-YH	1242	533	405	47	132.648	95.1292	10.1726	-0.479642	-3.70484	-3.2252	Down	Down	Down	4.36e-06	1.12e-118	1.29e-76	K01376|1|0.0|634|ath:AT4G35350|[EC:3.4.22.-];K15272|2|5e-157|552|vvi:100248746|solute carrier family 35 (UDP-sugar transporter), member A1/2/3;K01365|3|2e-147|520|mtr:MTR_3g116080|cathepsin L [EC:3.4.22.15]	GO:0030312//external encapsulating structure;GO:0009536//plastid;GO:0005773//vacuole	GO:0070011//peptidase activity, acting on L-amino acid peptides	GO:0012501//programmed cell death;GO:0010073//meristem maintenance;GO:0019538//protein metabolic process;GO:0045491//xylan metabolic process	Xylem cysteine proteinase 1 [Arabidopsis thaliana]	ath:AT4G35350	XCP1
gi|161571252|gb|EY942715.1|EY942715	828	393	294	58	146.709	103.585	18.8302	-0.502141	-2.96184	-2.4597	Down	Down	Down	5.08e-05	4.66e-71	1.16e-41	-	GO:0009526//plastid envelope	GO:0005488//binding	GO:0015698//inorganic anion transport;GO:0010876//lipid localization;GO:0010035//response to inorganic substance	bifunctional inhibitorlipid-transfer proteinseed storage 2S albumin-like protein [Arab	ath:AT3G22620
gi|166150731|gb|FD584019.1|FD584019	574	1822	1339	217	981.141	680.533	101.626	-0.527795	-3.27119	-2.74339	Down	Down	Down	6.02e-23	0	3.46e-215	-	-	-	-	-	None
CL12182.Contig1_NAU-YH	240	471	334	45	606.603	405.99	50.4032	-0.579307	-3.58916	-3.00986	Down	Down	Down	2.02e-07	4.16e-102	5.15e-59	-	-	-	-	-	ath:AT3G63052
Unigene12997_NAU-YH	370	3703	2528	8	3093.48	1993.22	5.81227	-0.634126	-9.05591	-8.42179	Down	Down	Down	2.89e-64	0	0	-	GO:0044444//cytoplasmic part	-	GO:0010035//response to inorganic substance;GO:0010101;GO:0009850//auxin metabolic process	iaa-leucine resistant 2 [Arabidopsis thaliana]	ath:AT3G18485	ILR2
CL3910.Contig1_NAU-YH	1769	7102	4754	543	1240.93	783.992	82.5143	-0.662512	-3.91064	-3.24812	Down	Down	Down	4.59e-133	0	0	K15748|1|0.0|751|aly:ARALYDRAFT_474364|beta-D-glucopyranosyl abscisate beta-glucosidase [EC:3.2.1.175];K01237|3|5e-158|556|ath:AT2G44490|myrosinase [EC:3.2.1.147];K01238|4|6e-149|526|ath:AT3G60120|[EC:3.2.1.-]	GO:0005911//cell-cell junction;GO:0009536//plastid;GO:0042579//microbody;GO:0044432//endoplasmic reticulum part	GO:0046914//transition metal ion binding;GO:0015926//glucosidase activity;GO:0016788//hydrolase activity, acting on ester bonds;GO:0019899//enzyme binding	GO:0009651//response to salt stress;GO:0009698//phenylpropanoid metabolic process;GO:0010208//pollen wall assembly;GO:0006996//organelle organization;GO:0044238//primary metabolic process;GO:0009409//response to cold;GO:0006952//defense response;GO:0009267//cellular response to starvation;GO:0009608//response to symbiont;GO:0048441//petal development	beta-glucosidase 23 [Arabidopsis thaliana]	ath:AT3G09260	PYK10
CL8289.Contig1_NAU-YH	972	1613	1079	91	512.936	323.844	25.167	-0.66348	-4.34917	-3.68569	Down	Down	Down	1.64e-30	0	1.95e-230	-	-	-	GO:0050832//defense response to fungus;GO:0006970//response to osmotic stress;GO:0042742//defense response to bacterium	osmotin-like protein OSM34 [Arabidopsis thaliana]	ath:AT4G11650	OSM34
gi|161560674|gb|EY932560.1|EY932560	511	459	298	15	277.643	170.128	7.89092	-0.70661	-5.13689	-4.43028	Down	Down	Down	4.74e-10	4.08e-127	1.32e-72	K07213|1|7e-29|124|osa:4344925|copper chaperone	GO:0009536//plastid;GO:0044427//chromosomal part;GO:0016020//membrane;GO:0005576//extracellular region	GO:0005507//copper ion binding;GO:1901981//phosphatidylinositol phosphate binding;GO:0000975//regulatory region DNA binding;GO:0016279//protein-lysine N-methyltransferase activity	GO:0034755//iron ion transmembrane transport;GO:0030003//cellular cation homeostasis;GO:0070838//divalent metal ion transport;GO:0009908//flower development;GO:0034968//histone lysine methylation;GO:0006351//transcription, DNA-dependent;GO:0006595//polyamine metabolic process;GO:0009626//plant-type hypersensitive response;GO:0006970//response to osmotic stress;GO:0016458//gene silencing;GO:000716…	homolog of anti-oxidant 1 [Arabidopsis thaliana]	ath:AT3G56240	CCH
CL4156.Contig1_NAU-YH	789	397	256	34	155.528	94.655	11.584	-0.716423	-3.74697	-3.03054	Down	Down	Down	5.69e-09	3.37e-89	1.58e-45	K00924|1|9e-11|65.5|ath:AT5G22850|[EC:2.7.1.-]	-	GO:0004175//endopeptidase activity	GO:0019538//protein metabolic process	hypothetical protein ARALYDRAFT_478632 [Arabidopsis lyrata subsp. lyrata]	ath:AT3G59080
gi|158917730|gb|EX891409.1|EX891409	584	320	206	71	169.368	102.905	32.6816	-0.718856	-2.37361	-1.65476	Down	Down	Down	2.13e-07	3.39e-45	1.67e-17	-	GO:0005911//cell-cell junction;GO:0015630//microtubule cytoskeleton;GO:0031090//organelle membrane;GO:0009534//chloroplast thylakoid	GO:0032550;GO:0017111//nucleoside-triphosphatase activity;GO:0019901//protein kinase binding	GO:0006898//receptor-mediated endocytosis;GO:0003006//developmental process involved in reproduction;GO:0003002//regionalization;GO:0008104//protein localization;GO:0000904//cell morphogenesis involved in differentiation;GO:0009154//purine ribonucleotide catabolic process;GO:0000919//cell plate assembly	MJC20_19 [Arabidopsis thaliana]	ath:AT5G42080	DL1
gi|158644220|gb|EX754111.1|EX754111	431	141	88	513	101.12	59.5643	23.0771	-0.763548	-2.13153	-1.36798	Down	Down	Down	0.000571444	1.16e-17	5.77e-06	-	GO:0043231//intracellular membrane-bounded organelle	GO:0046914//transition metal ion binding;GO:0001071//nucleic acid binding transcription factor activity;GO:0003677//DNA binding	GO:0048511//rhythmic process;GO:0006351//transcription, DNA-dependent;GO:0044707	BME3/BME3-ZF [Arabidopsis lyrata subsp. lyrata]	ath:AT3G54810	BME3
Unigene24913_NAU-YH	227	167	103	513	227.397	132.371	10.658	-0.780632	-4.41521	-3.63458	Down	Down	Down	0.000100569	2.9e-42	1.25e-21	K14157|1|2e-35|145|aly:ARALYDRAFT_491371|alpha-aminoadipic semialdehyde synthase [EC:1.5.1.8 1.5.1.9]	GO:0043231//intracellular membrane-bounded organelle;GO:0044444//cytoplasmic part	GO:0004753//saccharopine dehydrogenase activity;GO:0036094//small molecule binding	GO:0009746;GO:0009628//response to abiotic stimulus;GO:0034285;GO:0006554//lysine catabolic process;GO:0042743//hydrogen peroxide metabolic process;GO:0003006//developmental process involved in reproduction;GO:0070646//protein modification by small protein removal	lysine-ketoglutarate reductase/saccharopine dehydrogenase bifunctional enzyme [Arabidopsis thaliana]	None
CL2531.Contig1_NAU-YH	1249	1537	945	256	380.37	220.724	55.0979	-0.785159	-2.78734	-2.00218	Down	Down	Down	6.22e-39	1.03e-260	1.47e-103	K00430|1|4e-157|552|aly:ARALYDRAFT_908444|peroxidase [EC:1.11.1.7]	GO:0005576//extracellular region;GO:0030312//external encapsulating structure	GO:0003824//catalytic activity;GO:0016209//antioxidant activity;GO:0043169//cation binding;GO:0046906//tetrapyrrole binding	GO:0044710;GO:0006950//response to stress	peroxidase 52, partial [Brassica rapa]	ath:AT5G05340
CL8827.Contig2_NAU-YH	1358	2489	1489	257	566.526	319.871	50.8734	-0.824651	-3.47716	-2.65251	Down	Down	Down	2.07e-68	0	1.46e-230	-	GO:0005618//cell wall	-	GO:0009628//response to abiotic stimulus	UF642 l-GalL-responsive protein 1 [Arabidopsis thaliana]	ath:AT5G25460
CL121.Contig7_NAU-YH	209	198	116	513	292.829	161.917	68.169	-0.854804	-2.10287	-1.24807	Down	Down	Down	2.79e-06	3.36e-24	9.64e-07	-	-	-	-	-	None
CL124.Contig3_NAU-YH	1067	396	229	81	114.716	62.6111	20.4069	-0.873581	-2.49094	-1.61736	Down	Down	Down	2.29e-12	3.5e-59	8.38e-19	K10403|1|1e-70|265|ath:AT5G02370|kinesin family member 22	GO:0009536//plastid;GO:0015630//microtubule cytoskeleton	GO:0032550;GO:0043167//ion binding;GO:0003676//nucleic acid binding;GO:0003774//motor activity	GO:0009908//flower development;GO:0006928//cellular component movement;GO:0006464//cellular protein modification process;GO:0000086//G2/M transition of mitotic cell cycle;GO:0006260//DNA replication	kinesin family member 22 [Arabidopsis thaliana]	ath:AT5G02370
Unigene1588_NAU-YH	486	241	138	27	153.277	82.8368	14.9343	-0.887793	-3.35944	-2.47164	Down	Down	Down	5.86e-08	2.9e-49	9.69e-20	K00423|1|4e-23|105|ppp:PHYPADRAFT_163787|L-ascorbate oxidase [EC:1.10.3.3]	GO:0005576//extracellular region	GO:0046914//transition metal ion binding;GO:0016682//oxidoreductase activity, acting on diphenols and related substances as donors, oxygen as acceptor	GO:0009808//lignin metabolic process	hypothetical protein ARALYDRAFT_481932 [Arabidopsis lyrata subsp. lyrata]	ath:AT2G30210	LAC3
CL1181.Contig1_NAU-YH	1276	720	405	195	174.412	92.5944	41.081	-0.913503	-2.08596	-1.17245	Down	Down	Down	9.09e-24	2.46e-86	2.46e-20	K09422|1|3e-144|509|ath:AT4G37260|myb proto-oncogene protein, plant	GO:0043231//intracellular membrane-bounded organelle	GO:0003676//nucleic acid binding;GO:0001071//nucleic acid binding transcription factor activity	GO:0006952//defense response;GO:0010038//response to metal ion;GO:0009725//response to hormone stimulus;GO:0010243//response to organic nitrogen;GO:0019932//second-messenger-mediated signaling;GO:0006970//response to osmotic stress;GO:0014070//response to organic cyclic compound;GO:0009966//regulation of signal transduction;GO:0006351//transcription, DNA-dependent;GO:0009605//response to external…	myb domain protein 73 [Arabidopsis thaliana]	ath:AT4G37260	MYB73
gi|156153269|gb|EW713415.1|EW713415	758	434	242	83	176.976	93.1379	29.4351	-0.926116	-2.58795	-1.66183	Down	Down	Down	7.58e-15	8.97e-68	1.26e-20	-	-	-	-	hypothetical protein ARALYDRAFT_327563 [Arabidopsis lyrata subsp. lyrata]	ath:AT1G02820
gi|158928054|gb|EX900860.1|EX900860	376	140	78	513	115.089	60.5184	22.1631	-0.927309	-2.37652	-1.44921	Down	Down	Down	3.2e-05	5.34e-20	8.76e-06	K00797|1|5e-17|84.0|aly:ARALYDRAFT_909990|spermidine synthase [EC:2.5.1.16]	-	-	-	spermine synthase [Arabidopsis halleri subsp. gemmifera]	ath:AT5G19530	ACL5
gi|154164597|gb|EV535871.1|EV535871	758	6355	3448	1050	2591.44	1327.02	372.372	-0.96556	-2.79894	-1.83338	Down	Down	Down	6.7e-228	0	0	-	-	-	-	-	None
CL1504.Contig1_NAU-YH	1109	597	323	122	166.394	84.9672	29.5723	-0.969625	-2.49228	-1.52266	Down	Down	Down	8.2e-22	3.16e-89	3.4e-24	K09286|1|9e-19|92.8|vvi:100252531|EREBP-like factor	GO:0043231//intracellular membrane-bounded organelle	GO:0003676//nucleic acid binding;GO:0001071//nucleic acid binding transcription factor activity	GO:0080090//regulation of primary metabolic process;GO:0031323//regulation of cellular metabolic process;GO:0006351//transcription, DNA-dependent	AP2 domain-containing transcription factor family protein [Arabidopsis lyrata subsp.	ath:AT1G21910
gi|161541154|gb|EY912858.1|EY912858	571	590	315	86	319.382	160.937	40.4874	-0.988791	-2.97974	-1.99095	Down	Down	Down	2.92e-22	2.51e-107	2.77e-34	-	-	-	-	arabinogalactan protein 12 [Arabidopsis thaliana]	ath:AT3G13520	AGP12
CL48.Contig2_NAU-YH	1257	1681	895	106	413.359	207.715	22.6688	-0.992788	-4.18862	-3.19583	Down	Down	Down	3.19e-63	0	3.62e-168	K00430|1|3e-164|576|ath:AT4G36430|peroxidase [EC:1.11.1.7]	GO:0030312//external encapsulating structure	GO:0003824//catalytic activity;GO:0016209//antioxidant activity;GO:0043169//cation binding;GO:0046906//tetrapyrrole binding	GO:0044710;GO:0051707//response to other organism;GO:0006950//response to stress	horseradish peroxidase isoenzyme HRP_08562.4 [Armoracia rusticana]	ath:AT4G36430
Unigene2215_NAU-YH	1510	1024	539	162	209.613	104.134	28.84	-1.00929	-2.86158	-1.8523	Down	Down	Down	1.13e-39	1.26e-178	3.54e-53	-	-	-	-	-	None
CL441.Contig1_NAU-YH	1745	1267	662	275	224.427	110.673	42.3638	-1.01994	-2.40535	-1.38541	Down	Down	Down	7.14e-50	1.53e-181	7.24e-43	K05907|1|0.0|754|ath:AT1G62180|adenylyl-sulfate reductase (glutathione) [EC:1.8.4.9]	GO:0009532//plastid stroma;GO:0031976	GO:0016671//oxidoreductase activity, acting on a sulfur group of donors, disulfide as acceptor	GO:0000097//sulfur amino acid biosynthetic process;GO:0009683;GO:0000103//sulfate assimilation;GO:0019725//cellular homeostasis;GO:0019758	APS reductase [Brassica juncea]	ath:AT1G62180	APR2
CL8144.Contig2_NAU-YH	1062	1750	908	336	509.341	249.426	85.0495	-1.03002	-2.58226	-1.55224	Down	Down	Down	6.39e-70	1.42e-272	1.14e-69	K09338|1|2e-122|437|aly:ARALYDRAFT_490793|homeobox-leucine zipper protein	GO:0043231//intracellular membrane-bounded organelle	GO:0005515//protein binding;GO:0001071//nucleic acid binding transcription factor activity;GO:0044212//transcription regulatory region DNA binding	GO:0006351//transcription, DNA-dependent;GO:0009414//response to water deprivation;GO:0042743//hydrogen peroxide metabolic process;GO:0009648//photoperiodism;GO:0006970//response to osmotic stress;GO:0048506;GO:0009738//abscisic acid mediated signaling pathway;GO:0016049//cell growth	homeobox-leucine zipper protein ATHB-16 [Arabidopsis thaliana]	ath:AT4G40060	HB16
Unigene24602_NAU-YH	1305	427	221	0	101.137	49.404	0.01	-1.03362	-13.304	-12.2704	Down	Down	Down	1.95e-17	2.71e-140	5.31e-69	-	-	-	-	-	None
Unigene16513_NAU-YH	933	370	189	57	122.579	59.0963	16.4229	-1.05257	-2.89993	-1.84736	Down	Down	Down	1.27e-15	1.88e-65	1.04e-18	-	-	-	-	-	None
Unigene24305_NAU-YH	423	144	73	513	105.225	50.3458	0.01	-1.06353	-13.3612	-12.2977	Down	Down	Down	1.54e-06	9.84e-47	2.66e-22	-	-	-	-	-	None
CL7816.Contig2_NAU-YH	1552	753	381	139	149.968	71.6166	24.0758	-1.06629	-2.639	-1.57271	Down	Down	Down	5.3e-32	3.56e-120	7.17e-30	-	GO:0016020//membrane;GO:0009536//plastid	-	GO:0015833//peptide transport;GO:0048588//developmental cell growth	hypothetical protein [Arabidopsis thaliana]	ath:AT5G11000
Unigene20126_NAU-YH	949	1748	883	433	569.338	271.441	122.653	-1.06865	-2.2147	-1.14605	Down	Down	Down	3.54e-74	2.95e-226	1.81e-42	K00799|1|4e-97|352|aly:ARALYDRAFT_482003|glutathione S-transferase [EC:2.5.1.18]	GO:0005911//cell-cell junction;GO:0016020//membrane;GO:0005576//extracellular region;GO:0009532//plastid stroma;GO:0030312//external encapsulating structure	GO:0016765//transferase activity, transferring alkyl or aryl (other than methyl) groups;GO:0046914//transition metal ion binding;GO:0004601//peroxidase activity;GO:0072341//modified amino acid binding	GO:0006568//tryptophan metabolic process;GO:0006732//coenzyme metabolic process;GO:0009414//response to water deprivation;GO:0030001//metal ion transport;GO:0006007//glucose catabolic process;GO:0006090//pyruvate metabolic process;GO:0015698//inorganic anion transport;GO:0006753//nucleoside phosphate metabolic process;GO:0006633//fatty acid biosynthetic process;GO:0006970//response to osmotic str…	glutathione S-transferase ERD13 [Arabidopsis thaliana]	ath:AT2G30870	GSTF10
Unigene30538_NAU-YH	439	425	214	0	299.24	142.21	0.01	-1.07328	-14.869	-13.7957	Down	Down	Down	1.98e-18	1.24e-139	8.81e-67	-	-	-	-	-	None
Unigene20013_NAU-YH	954	1850	919	475	599.402	281.027	133.845	-1.09282	-2.16296	-1.07014	Down	Down	Down	2.07e-81	2.24e-232	1.46e-39	K00264|1|3e-108|389|ath:AT5G53460|glutamate synthase (NADPH/NADH) [EC:1.4.1.13 1.4.1.14]	GO:0009532//plastid stroma	GO:0032553;GO:0046914//transition metal ion binding;GO:0045181//glutamate synthase activity, NAD(P)H as acceptor;GO:0051540	GO:0006007//glucose catabolic process;GO:0010038//response to metal ion;GO:0040007//growth;GO:0042126//nitrate metabolic process;GO:0006970//response to osmotic stress;GO:0006536//glutamate metabolic process	glutamate synthase 1 [NADH] [Arabidopsis thaliana]	ath:AT5G53460	GLT1
CL6513.Contig1_NAU-YH	811	350	171	79	133.396	61.5114	26.1857	-1.11679	-2.34886	-1.23208	Down	Down	Down	3e-16	8.59e-49	1.64e-09	-	GO:0005911//cell-cell junction;GO:0031225//anchored to membrane	GO:0046914//transition metal ion binding	GO:0006468//protein phosphorylation;GO:0033205//cell cycle cytokinesis;GO:0006637//acyl-CoA metabolic process;GO:0007010//cytoskeleton organization;GO:0010073//meristem maintenance;GO:0006461//protein complex assembly	early nodulin-like protein 15 [Arabidopsis thaliana]	ath:AT4G31840	ENODL15
CL7020.Contig2_NAU-YH	1387	651	316	84	145.077	66.4647	16.2802	-1.12616	-3.15563	-2.02947	Down	Down	Down	2.97e-30	1.94e-125	2.84e-35	K13947|1|3e-137|486|aly:ARALYDRAFT_676624|auxin efflux carrier family	GO:0005911//cell-cell junction;GO:0031224//intrinsic to membrane;GO:0012505//endomembrane system;GO:0044459//plasma membrane part	GO:0015562//efflux transmembrane transporter activity;GO:0015294//solute:cation symporter activity	GO:0009630//gravitropism;GO:0048764;GO:0043479;GO:0009639//response to red or far red light;GO:0005976//polysaccharide metabolic process;GO:0045229//external encapsulating structure organization;GO:0009734//auxin mediated signaling pathway;GO:0032535//regulation of cellular component size;GO:0051301//cell division;GO:0009826//unidimensional cell growth;GO:0000904//cell morphogenesis involved in d…	efflux carrier of polar auxin transport [Brassica juncea]	ath:AT1G70940	PIN3
Unigene30746_NAU-YH	309	108	52	513	108.034	49.0937	21.749	-1.13788	-2.31247	-1.17459	Down	Down	Down	1.42e-05	4.78e-15	0.00406212	-	-	-	-	-	None
Unigene23212_NAU-YH	372	234	112	17	194.432	87.8326	12.2847	-1.14644	-3.98434	-2.8379	Down	Down	Down	1.72e-11	3.84e-55	1.11e-18	-	-	-	-	-	None
CL6109.Contig2_NAU-YH	1496	499	235	52	103.101	45.8265	9.34392	-1.16981	-3.46389	-2.29408	Down	Down	Down	1.03e-24	7.13e-105	1.18e-30	K03327|1|0.0|728|aly:ARALYDRAFT_475142|multidrug resistance protein, MATE family	GO:0009536//plastid;GO:0016020//membrane	GO:0015291//secondary active transmembrane transporter activity	GO:0015893//drug transport;GO:0044763;GO:0009725//response to hormone stimulus;GO:0010243//response to organic nitrogen;GO:0032787//monocarboxylic acid metabolic process;GO:0006970//response to osmotic stress;GO:0006812//cation transport	MATE efflux family protein [Arabidopsis thaliana]	ath:AT1G61890
CL11619.Contig3_NAU-YH	1104	394	185	30	110.312	48.8858	7.30482	-1.1741	-3.9166	-2.7425	Down	Down	Down	1.03e-19	1.1e-91	1.16e-29	K11821|1|1e-57|221|ath:AT1G74100|desulfoglucosinolate sulfotransferase A/B/C [EC:2.8.2.-];K01014|3|4e-10|63.9|olu:OSTLU_32551|aryl sulfotransferase [EC:2.8.2.1]	-	GO:0008146//sulfotransferase activity	GO:0006468//protein phosphorylation;GO:0009698//phenylpropanoid metabolic process;GO:0016128;GO:0009755//hormone-mediated signaling pathway	sulfotransferase family protein [Arabidopsis thaliana]	ath:AT5G43690
CL7842.Contig2_NAU-YH	1136	475	223	52	129.244	57.2673	12.305	-1.17431	-3.39278	-2.21847	Down	Down	Down	1.1e-23	5.64e-98	6.32e-28	K09286|1|9e-78|288|ath:AT3G15210|EREBP-like factor	GO:0044451//nucleoplasm part	GO:0001071//nucleic acid binding transcription factor activity;GO:0003676//nucleic acid binding	GO:0006351//transcription, DNA-dependent;GO:0010243//response to organic nitrogen;GO:0009873//ethylene mediated signaling pathway;GO:0002252;GO:0002218//activation of innate immune response	ethylene-responsive transcription factor 4 [Arabidopsis thaliana]	ath:AT3G15210	ERF4
CL4779.Contig7_NAU-YH	1240	475	222	53	118.404	52.229	11.4898	-1.1808	-3.3653	-2.1845	Down	Down	Down	6.86e-24	2.97e-97	2.84e-27	K01915|1|0.0|691|aly:ARALYDRAFT_915897|glutamine synthetase [EC:6.3.1.2]	GO:0005911//cell-cell junction;GO:0016020//membrane;GO:0005840//ribosome;GO:0005576//extracellular region;GO:0009532//plastid stroma;GO:0030312//external encapsulating structure;GO:0009526//plastid envelope	GO:0046914//transition metal ion binding;GO:0032550;GO:0016211	GO:0006541//glutamine metabolic process;GO:0006575//cellular modified amino acid metabolic process;GO:0010260//organ senescence;GO:0034285;GO:0006007//glucose catabolic process;GO:0042743//hydrogen peroxide metabolic process;GO:0006996//organelle organization;GO:0006970//response to osmotic stress;GO:0010038//response to metal ion;GO:0070838//divalent metal ion transport;GO:0009746;GO:0006725//ce…	glutamine synthetase [Raphanus sativus]	ath:AT5G37600	GSR_1
gi|167449311|gb|FD958295.1|FD958295	546	201	93	42	113.788	49.6902	20.6783	-1.19532	-2.46017	-1.26485	Down	Down	Down	1.36e-10	9.91e-30	1.27e-05	-	GO:0043231//intracellular membrane-bounded organelle	-	GO:0033205//cell cycle cytokinesis;GO:0007010//cytoskeleton organization;GO:0014070//response to organic cyclic compound	predicted protein [Arabidopsis lyrata subsp. lyrata]	ath:AT3G02120
gi|166100352|gb|FD528938.1|FD528938	604	252	115	42	128.961	55.5445	18.6926	-1.21522	-2.7864	-1.57118	Down	Down	Down	1.77e-13	9.21e-43	2.95e-09	-	GO:0043231//intracellular membrane-bounded organelle	-	GO:0022610	beta-Ig-H3 domain-containing protein [Arabidopsis lyrata subsp. lyrata]	ath:AT5G06390	FLA17
Unigene23482_NAU-YH	365	293	133	15	248.124	106.301	11.0473	-1.2229	-4.4893	-3.2664	Down	Down	Down	9.75e-16	4.95e-75	1.96e-25	-	-	GO:0003824//catalytic activity	GO:0044238//primary metabolic process;GO:0010073//meristem maintenance	putative protein [Arabidopsis thaliana]	ath:AT3G63200	PLP9
Unigene19021_NAU-YH	338	113	51	513	103.337	44.0184	17.497	-1.23118	-2.56218	-1.331	Down	Down	Down	1.73e-06	1.11e-17	0.00138081	K00423|1|1e-06|49.3|aly:ARALYDRAFT_892557|L-ascorbate oxidase [EC:1.10.3.3]	GO:0005618//cell wall;GO:0005911//cell-cell junction;GO:0044444//cytoplasmic part;GO:0005576//extracellular region	GO:0046914//transition metal ion binding;GO:0052689	GO:0006694//steroid biosynthetic process;GO:0009664//plant-type cell wall organization;GO:0042546//cell wall biogenesis	Putative pectinesterase [Arabidopsis thaliana]	ath:AT1G41830	SKS6
CL7784.Contig1_NAU-YH	651	405	179	92	192.295	80.2144	37.9895	-1.26139	-2.33965	-1.07826	Down	Down	Down	1.25e-22	3.6e-56	4.05e-08	-	GO:0005911//cell-cell junction;GO:0005618//cell wall;GO:0005576//extracellular region	GO:0060089	GO:0009725//response to hormone stimulus;GO:0006873//cellular ion homeostasis;GO:0040007//growth;GO:0030001//metal ion transport;GO:0007154//cell communication	hypothetical protein ARALYDRAFT_897975 [Arabidopsis lyrata subsp. lyrata]	ath:AT3G16570	RALF23
gi|166111200|gb|FD541835.1|FD541835	384	299	130	16	240.677	98.7626	11.2007	-1.28506	-4.42544	-3.14037	Down	Down	Down	2.64e-17	7.18e-76	5.88e-24	-	-	-	-	polygalacturonase isoenzyme 1 beta subunit homolog [Arabidopsis thaliana]	ath:AT1G70370	PG2
CL4726.Contig1_NAU-YH	1286	440	189	75	105.756	42.8747	15.6775	-1.30255	-2.75397	-1.45143	Down	Down	Down	8.56e-26	1.2e-73	2.42e-13	-	GO:0043231//intracellular membrane-bounded organelle	GO:0004175//endopeptidase activity	GO:0019538//protein metabolic process	metacaspase 3 [Arabidopsis thaliana]	ath:AT5G64240	MC3
gi|161571652|gb|EY942827.1|EY942827	758	340	146	0	138.645	56.1907	0.01	-1.30299	-13.7591	-12.4561	Down	Down	Down	4.94e-20	1.72e-111	2.89e-45	K02267|1|4e-34|75.1|ath:AT4G28060|cytochrome c oxidase subunit 6b	-	-	-	putative protein [Arabidopsis thaliana]	ath:AT1G22450	COX6B
Unigene5799_NAU-YH	869	702	301	0	249.696	101.048	0.01	-1.30514	-14.6079	-13.3028	Down	Down	Down	4.53e-41	1.9e-231	2.24e-94	-	-	-	-	-	None
CL3696.Contig1_NAU-YH	1309	1328	565	78	313.584	125.918	16.0181	-1.31636	-4.29107	-2.97471	Down	Down	Down	1.57e-78	0	9.5e-99	K05894|1|0.0|720|aly:ARALYDRAFT_476828|12-oxophytodienoic acid reductase [EC:1.3.1.42]	GO:0044444//cytoplasmic part	GO:0032553;GO:0016628//oxidoreductase activity, acting on the CH-CH group of donors, NAD or NADP as acceptor	GO:0006631//fatty acid metabolic process;GO:0010038//response to metal ion;GO:0009694//jasmonic acid metabolic process;GO:0014070//response to organic cyclic compound;GO:0010260//organ senescence;GO:0006950//response to stress	12-oxophytodienoate reductase 1 [Arabidopsis thaliana]	ath:AT1G76680	OPR1
gi|161578389|gb|EY950008.1|EY950008	633	820	347	227	400.41	159.921	96.4005	-1.32412	-2.05437	-0.730249	Down	Down	Down	5.18e-49	2.26e-96	3.82e-08	-	-	-	-	protease inhibitor II [Brassica rapa]	ath:AT2G02100	LCR69
CL10426.Contig2_NAU-YH	852	596	251	96	216.223	85.9438	30.2893	-1.33105	-2.83564	-1.50459	Down	Down	Down	5.5e-36	6.11e-103	1.51e-18	K14504|1|5e-101|365|aly:ARALYDRAFT_918931|xyloglucan:xyloglucosyl transferase TCH4 [EC:2.4.1.207];K08235|3|5e-96|348|aly:ARALYDRAFT_354208|xyloglucan:xyloglucosyl transferase [EC:2.4.1.207]	GO:0005618//cell wall;GO:0009536//plastid;GO:0005576//extracellular region;GO:0016020//membrane	GO:0016798//hydrolase activity, acting on glycosyl bonds;GO:0016758//transferase activity, transferring hexosyl groups	GO:0044042//glucan metabolic process;GO:0010243//response to organic nitrogen;GO:0044767;GO:0010476//gibberellin mediated signaling pathway;GO:0009827//plant-type cell wall modification;GO:0006950//response to stress;GO:0009605//response to external stimulus	xyloglucan endotransglucosylase/hydrolase protein 22 [Arabidopsis thaliana]	ath:AT5G57560	TCH4
Unigene28130_NAU-YH	751	966	403	132	397.587	156.547	47.2488	-1.34467	-3.07292	-1.72825	Down	Down	Down	4.44e-59	2.32e-181	3.85e-36	K13065|1|6e-14|75.9|ath:AT5G48930|shikimate O-hydroxycinnamoyltransferase [EC:2.3.1.133]	-	GO:0016747//transferase activity, transferring acyl groups other than amino-acyl groups	GO:0009628//response to abiotic stimulus	HXXXD-type acyl-transferase-like protein [Arabidopsis thaliana]	ath:AT5G01210
gi|167493022|gb|FD976738.1|FD976738	794	260	106	47	101.216	38.9463	15.9124	-1.37788	-2.66921	-1.29134	Down	Down	Down	9.06e-17	4.28e-42	1.62e-06	K00360|1|2e-08|57.8|ppp:PHYPADRAFT_184973|nitrate reductase (NADH) [EC:1.7.1.1];K13076|2|5e-06|49.7|bdi:100826592|delta8-fatty-acid desaturase [EC:1.14.19.4]	GO:0031090//organelle membrane;GO:0043231//intracellular membrane-bounded organelle;GO:0031224//intrinsic to membrane	GO:0046906//tetrapyrrole binding;GO:0043169//cation binding;GO:0008940//nitrate reductase activity	GO:0006952//defense response;GO:0044710;GO:0006091//generation of precursor metabolites and energy	B5 #4 [Arabidopsis lyrata subsp. lyrata]	ath:AT2G32720	CB5-B
gi|166138663|gb|FD572349.1|FD572349	649	288	116	72	137.165	52.1427	29.8226	-1.39537	-2.20143	-0.806062	Down	Down	Down	7.12e-19	4.1e-37	0.00131545	-	-	-	-	predicted protein [Arabidopsis lyrata subsp. lyrata]	ath:AT3G15950	NAI2
Unigene18656_NAU-YH	701	239	93	62	105.384	38.7031	23.7756	-1.44514	-2.1481	-0.702968	Down	Down	Down	1.43e-16	6.29e-30	0.0153703	K13448|1|4e-06|49.7|pop:POPTR_726467|calcium-binding protein CML;K02183|2|7e-06|48.9|bdi:100835472|calmodulin	GO:0043231//intracellular membrane-bounded organelle;GO:0005911//cell-cell junction;GO:0044444//cytoplasmic part;GO:0016020//membrane	GO:0046914//transition metal ion binding	GO:0044267//cellular protein metabolic process;GO:0010243//response to organic nitrogen;GO:0009692;GO:0014070//response to organic cyclic compound;GO:0009755//hormone-mediated signaling pathway;GO:0006972//hyperosmotic response;GO:0050790//regulation of catalytic activity;GO:0009605//response to external stimulus	calcium-binding EF hand family protein [Arabidopsis lyrata subsp. lyrata]	ath:AT4G27280
Unigene24915_NAU-YH	1469	646	249	64	135.927	49.4491	11.7116	-1.45882	-3.53682	-2.07801	Down	Down	Down	9.08e-45	2.62e-138	1.09e-28	K14157|1|0.0|855|aly:ARALYDRAFT_491371|alpha-aminoadipic semialdehyde synthase [EC:1.5.1.8 1.5.1.9]	GO:0043231//intracellular membrane-bounded organelle;GO:0044444//cytoplasmic part	GO:0004753//saccharopine dehydrogenase activity;GO:0036094//small molecule binding	GO:0009746;GO:0009628//response to abiotic stimulus;GO:0034285;GO:0006554//lysine catabolic process;GO:0042743//hydrogen peroxide metabolic process;GO:0003006//developmental process involved in reproduction;GO:0070646//protein modification by small protein removal	lysine-ketoglutarate reductasesaccharopine dehydrogenase bifunctional enzyme [Arabidopsis lyr	ath:AT4G33150
CL6755.Contig2_NAU-YH	1827	593	228	30	100.325	36.4063	4.41408	-1.46243	-4.50643	-3.04401	Down	Down	Down	2.88e-41	1.89e-152	1.01e-40	K09755|1|0.0|926|aly:ARALYDRAFT_912739|ferulate-5-hydroxylase [EC:1.14.-.-]	GO:0043231//intracellular membrane-bounded organelle	GO:0046906//tetrapyrrole binding;GO:0046914//transition metal ion binding;GO:0004497//monooxygenase activity	GO:0009411//response to UV;GO:0012501//programmed cell death;GO:0006631//fatty acid metabolic process;GO:0016044//cellular membrane organization;GO:0009699//phenylpropanoid biosynthetic process;GO:0048193//Golgi vesicle transport	cytochrome p450-dependent monooxygenase [Brassica napus]	ath:AT4G36220	FAH1
CL4823.Contig4_NAU-YH	1597	4280	1639	344	828.388	299.402	57.9043	-1.46822	-3.83856	-2.37034	Down	Down	Down	7.47e-299	0	1.18e-222	-	GO:0009536//plastid;GO:0005911//cell-cell junction	GO:0046914//transition metal ion binding	GO:0044267//cellular protein metabolic process;GO:0009692;GO:0014070//response to organic cyclic compound;GO:0009755//hormone-mediated signaling pathway;GO:0006972//hyperosmotic response;GO:0050790//regulation of catalytic activity	jasmonate inducible protein [Brassica napus]	ath:AT3G16460
Unigene22557_NAU-YH	717	915	347	132	394.454	141.186	49.4894	-1.48226	-2.99467	-1.5124	Down	Down	Down	7.61e-65	2.36e-167	1.02e-25	-	-	-	-	-	None
Unigene30373_NAU-YH	897	594	225	96	204.686	73.1763	28.7697	-1.48397	-2.83079	-1.34682	Down	Down	Down	3.04e-42	2.08e-102	3.71e-14	-	GO:0009536//plastid;GO:0044391	GO:0005198//structural molecule activity	GO:0010467//gene expression	hypothetical protein VITISV_009275 [Vitis vinifera]	None
Unigene8258_NAU-YH	732	399	150	69	168.483	59.7807	25.3393	-1.49485	-2.73315	-1.2383	Down	Down	Down	8.6e-29	3.09e-66	1.83e-08	-	GO:0005618//cell wall;GO:0005911//cell-cell junction;GO:0005576//extracellular region	GO:0060089;GO:0005102//receptor binding	GO:0006575//cellular modified amino acid metabolic process;GO:0009725//response to hormone stimulus;GO:0019932//second-messenger-mediated signaling;GO:0048588//developmental cell growth;GO:0006873//cellular ion homeostasis;GO:0006595//polyamine metabolic process;GO:0006725//cellular aromatic compound metabolic process;GO:0030001//metal ion transport	hypothetical protein ARALYDRAFT_477838 [Arabidopsis lyrata subsp. lyrata]	ath:AT3G05490	RALFL22
gi|158652065|gb|EX761956.1|EX761956	691	6847	2561	616	3062.79	1081.21	239.64	-1.50219	-3.6759	-2.17371	Down	Down	Down	0	0	0	-	-	-	-	predicted protein [Populus trichocarpa]	None
CL2167.Contig3_NAU-YH	827	298	109	69	111.38	38.4505	22.4285	-1.53441	-2.31208	-0.777666	Down	Down	Down	1.99e-22	8.61e-41	0.00290132	-	-	-	GO:0009628//response to abiotic stimulus	hypothetical protein [Arabidopsis thaliana]	ath:AT5G48500
gi|167445579|gb|FD952987.1|FD952987	730	441	159	47	186.728	63.5411	17.3074	-1.55518	-3.43148	-1.8763	Down	Down	Down	1.12e-33	6.76e-92	4.02e-16	-	-	-	-	F12M16.12 [Arabidopsis thaliana]	ath:AT1G53210
CL7101.Contig3_NAU-YH	359	131	47	513	112.79	38.193	15.7247	-1.56226	-2.84254	-1.28028	Down	Down	Down	2.18e-10	7.61e-23	0.00334544	-	-	-	-	-	None
CL48.Contig3_NAU-YH	1284	2527	887	140	608.324	201.53	29.3103	-1.59385	-4.37536	-2.78151	Down	Down	Down	3.75e-199	0	1.36e-144	K00430|1|9e-170|594|ath:AT4G36430|peroxidase [EC:1.11.1.7]	GO:0030312//external encapsulating structure	GO:0003824//catalytic activity;GO:0016209//antioxidant activity;GO:0043169//cation binding;GO:0046906//tetrapyrrole binding	GO:0044710;GO:0051707//response to other organism;GO:0006950//response to stress	horseradish peroxidase isoenzyme HRP_08562.4 [Armoracia rusticana]	ath:AT4G36430
Unigene27284_NAU-YH	1210	1842	645	106	470.543	155.509	23.5493	-1.59733	-4.32057	-2.72324	Down	Down	Down	1.27e-145	0	1.13e-102	K01802|1|2e-80|298|ath:AT4G38740|peptidylprolyl isomerase [EC:5.2.1.8]	GO:0016020//membrane;GO:0005576//extracellular region;GO:0044444//cytoplasmic part	GO:0016859//cis-trans isomerase activity	GO:0048511//rhythmic process;GO:0007602//phototransduction;GO:0018208//peptidyl-proline modification;GO:0006468//protein phosphorylation;GO:0043401//steroid hormone mediated signaling pathway;GO:0010038//response to metal ion;GO:0030522//intracellular receptor mediated signaling pathway;GO:0000097//sulfur amino acid biosynthetic process;GO:0006950//response to stress	Peptidyl-prolyl cis-trans isomerase CYP18-3 [Arabidopsis thaliana]	ath:AT4G38740	ROC1
CL2054.Contig1_NAU-YH	3205	4373	1523	513	421.741	138.628	104.843	-1.60514	-2.00813	-0.402994	Down	Down	Down	0	0	6.01e-12	-	GO:0043231//intracellular membrane-bounded organelle	-	GO:0051234//establishment of localization	Mitochondrial protein, putative [Medicago truncatula]	ath:ArthMp003
gi|156175729|gb|EW735875.1|EW735875	835	848	294	84	313.909	102.717	27.0427	-1.61168	-3.53704	-1.92536	Down	Down	Down	5.77e-68	1.25e-181	1.28e-30	-	-	-	-	blue copper-binding protein II [Arabidopsis thaliana]	ath:AT3G60280	UCC3
gi|154096711|gb|EV529684.1|EV529684	798	470	162	87	182.05	59.2233	29.3071	-1.6201	-2.63501	-1.01491	Down	Down	Down	4.73e-38	6.62e-75	9.36e-07	-	-	-	-	hypothetical protein ARALYDRAFT_904347 [Arabidopsis lyrata subsp. lyrata]	ath:AT2G01520	MLP328
gi|154164657|gb|EV535931.1|EV535931	695	1940	667	151	862.803	279.976	58.4049	-1.62373	-3.88487	-2.26114	Down	Down	Down	4.55e-157	0	2.05e-85	-	-	-	-	-	None
Unigene15498_NAU-YH	746	1657	566	342	686.56	221.339	123.238	-1.63313	-2.47794	-0.844812	Down	Down	Down	2.85e-135	5.45e-246	1.38e-16	-	-	-	-	-	None
CL6593.Contig1_NAU-YH	492	259	88	64	162.716	52.1793	34.9681	-1.6408	-2.21824	-0.577437	Down	Down	Down	1.67e-21	9.87e-34	0.0611742	K05277|1|3e-08|55.8|ath:AT4G22870|leucoanthocyanidin dioxygenase [EC:1.14.11.19]	-	GO:0016705//oxidoreductase activity, acting on paired donors, with incorporation or reduction of molecular oxygen	GO:0044710	anthocyanidin synthase [Brassica juncea]	ath:AT4G22870
CL8256.Contig1_NAU-YH	965	599	202	75	191.864	61.0667	20.8925	-1.65163	-3.19903	-1.5474	Down	Down	Down	8.83e-50	6.08e-117	1.31e-15	K09422|1|4e-89|326|ath:AT3G50060|myb proto-oncogene protein, plant	GO:0043231//intracellular membrane-bounded organelle	GO:0001071//nucleic acid binding transcription factor activity;GO:0005488//binding	GO:0010243//response to organic nitrogen;GO:0006970//response to osmotic stress;GO:0014070//response to organic cyclic compound;GO:0010038//response to metal ion;GO:0009966//regulation of signal transduction;GO:0048528//post-embryonic root development;GO:0009725//response to hormone stimulus;GO:0006952//defense response	R2R3-MYB transcription factor [Brassica rapa]	ath:AT3G50060	MYB77
gi|156160974|gb|EW721120.1|EW721120	246	558	186	80	701.123	220.576	87.4203	-1.66839	-3.00363	-1.33524	Down	Down	Down	4.61e-47	2.41e-102	1.27e-11	-	-	-	-	-	None
CL5488.Contig1_NAU-YH	1022	687	228	28	207.779	65.0825	7.36486	-1.6747	-4.81825	-3.14354	Down	Down	Down	3.26e-58	5.77e-184	4.93e-42	K05907|1|3e-148|522|ath:AT4G21990|adenylyl-sulfate reductase (glutathione) [EC:1.8.4.9]	GO:0009532//plastid stroma;GO:0031976	GO:0016667//oxidoreductase activity, acting on a sulfur group of donors	GO:0000097//sulfur amino acid biosynthetic process;GO:0009683;GO:0019725//cellular homeostasis;GO:0019758	APS reductase [Brassica juncea]	ath:AT4G04610	APR1
gi|154259332|gb|EV570351.1|EV570351	562	791	256	154	435.046	132.887	73.6617	-1.71096	-2.56218	-0.851219	Down	Down	Down	4.62e-69	4.58e-122	7.52e-08	-	-	GO:0005488//binding;GO:0016787//hydrolase activity	GO:0007243//intracellular protein kinase cascade;GO:0009626//plant-type hypersensitive response;GO:0010243//response to organic nitrogen;GO:0009627//systemic acquired resistance;GO:0006605//protein targeting;GO:0009696//salicylic acid metabolic process;GO:0019538//protein metabolic process;GO:0009755//hormone-mediated signaling pathway;GO:0010876//lipid localization;GO:0042743//hydrogen peroxide …	protease inhibitor/seed storage/lipid transfer protein family protein [Arabidopsis l	ath:AT5G55450
gi|167502812|gb|FD986155.1|FD986155	750	479	155	101	197.41	60.2908	36.2007	-1.71119	-2.4471	-0.735919	Down	Down	Down	6.61e-42	4.44e-70	0.000511444	K03671|1|1e-33|141|ppp:PHYPADRAFT_150511|thioredoxin 1	-	-	-	RecName: Full=Thioredoxin M-type, chloroplastic; Short=Trx-M; Flags: Precursor	ath:AT1G03680	THM1
gi|166142534|gb|FD574585.1|FD574585	848	447	139	24	162.932	47.8189	7.60804	-1.76862	-4.4206	-2.65198	Down	Down	Down	5.75e-41	2e-113	1.61e-21	-	GO:0043231//intracellular membrane-bounded organelle	GO:0061135	GO:0006952//defense response;GO:0000302//response to reactive oxygen species;GO:0008219//cell death;GO:0006970//response to osmotic stress;GO:0014070//response to organic cyclic compound;GO:0010466//negative regulation of peptidase activity	trypsin inhibitor propeptide [Brassica oleracea]	ath:AT1G73260	KTI1
gi|166135789|gb|FD567821.1|FD567821	724	256	79	72	109.294	31.8324	26.7332	-1.77965	-2.03151	-0.251862	Down	Down	Down	8.51e-24	8.01e-30	0.509958	K08360|1|1e-76|284|gmx:100306179|cytochrome b-561	GO:0031224//intrinsic to membrane;GO:0009536//plastid	GO:0005488//binding;GO:0016622	GO:0065008;GO:0000097//sulfur amino acid biosynthetic process;GO:0043479;GO:0045229//external encapsulating structure organization;GO:0048588//developmental cell growth;GO:0005976//polysaccharide metabolic process;GO:0009826//unidimensional cell growth	cytochrome b561 [Arabidopsis thaliana]	ath:AT4G25570	ACYB-2
CL9832.Contig1_NAU-YH	898	474	146	116	163.154	47.4304	34.7247	-1.78235	-2.2322	-0.449849	Down	Down	Down	6.76e-44	5.19e-62	0.0520653	-	GO:0043231//intracellular membrane-bounded organelle	-	GO:0008283//cell proliferation;GO:0043401//steroid hormone mediated signaling pathway;GO:0035265//organ growth;GO:0040008//regulation of growth	ARGOS-like protein [Arabidopsis thaliana]	ath:AT2G44080	ARL
gi|161565751|gb|EY937182.1|EY937182	680	270	83	5	122.73	35.6082	1.9766	-1.7852	-5.95632	-4.17112	Down	Down	Down	3.44e-25	1.26e-79	2.46e-19	K02605|1|4e-09|59.7|smo:SELMODRAFT_427211|origin recognition complex subunit 3	-	GO:0005488//binding	GO:0010876//lipid localization	bifunctional inhibitor/lipid-transfer protein/seed storage 2S albumin-like protein [Arabidopsis thaliana]	ath:AT4G33550
Unigene22617_NAU-YH	580	326	100	77	173.734	50.2982	35.6878	-1.7883	-2.28338	-0.495075	Down	Down	Down	2e-30	6.44e-44	0.0899998	K01187|1|3e-65|245|ath:AT5G11720|alpha-glucosidase [EC:3.2.1.20]	GO:0005618//cell wall;GO:0043231//intracellular membrane-bounded organelle;GO:0044444//cytoplasmic part;GO:0005576//extracellular region	GO:0005488//binding;GO:0016798//hydrolase activity, acting on glycosyl bonds	GO:0000097//sulfur amino acid biosynthetic process;GO:0008380//RNA splicing	alpha-glucosidase 1 [Arabidopsis thaliana]	ath:AT5G11720
gi|161553926|gb|EY926013.1|EY926013	772	456	139	104	182.575	52.5264	36.2137	-1.79738	-2.33388	-0.536507	Down	Down	Down	9.94e-43	4.92e-63	0.0213869	K01728|1|7e-45|178|aly:ARALYDRAFT_887643|pectate lyase [EC:4.2.2.2]	-	-	-	pectate lyase family protein [Arabidopsis lyrata subsp. lyrata]	ath:AT1G04680
CL3624.Contig1_NAU-YH	1610	1381	419	207	265.132	75.9222	34.5622	-1.80412	-2.93944	-1.13533	Down	Down	Down	8.33e-130	7.83e-248	5.53e-20	-	GO:0000325//plant-type vacuole;GO:0031090//organelle membrane	-	GO:0043479;GO:0005976//polysaccharide metabolic process;GO:0045764;GO:0045229//external encapsulating structure organization;GO:0032535//regulation of cellular component size;GO:0009826//unidimensional cell growth;GO:0006970//response to osmotic stress;GO:0009746;GO:0048588//developmental cell growth;GO:0009832//plant-type cell wall biogenesis;GO:0010073//meristem maintenance;GO:0060918//auxin tr…	protein walls are thin 1 [Arabidopsis thaliana]	ath:AT1G75500	WAT1
Unigene15676_NAU-YH	900	1014	306	198	348.249	99.1881	59.1398	-1.81188	-2.55792	-0.746037	Down	Down	Down	6.86e-96	3.39e-156	1.68e-07	-	GO:0009536//plastid	-	GO:0006625//protein targeting to peroxisome;GO:0009062//fatty acid catabolic process	hypothetical protein [Arabidopsis thaliana]	ath:AT5G19590
gi|156169637|gb|EW729783.1|EW729783	752	497	149	81	204.284	57.8028	28.9551	-1.82136	-2.81869	-0.997324	Down	Down	Down	2.08e-47	2.7e-85	4.22e-06	-	-	-	-	-	None
CL5935.Contig1_NAU-YH	1023	874	262	79	264.077	74.7147	20.7591	-1.82149	-3.66914	-1.84765	Down	Down	Down	2.89e-83	3.74e-193	7.73e-26	K14157|1|2e-109|393|aly:ARALYDRAFT_491371|alpha-aminoadipic semialdehyde synthase [EC:1.5.1.8 1.5.1.9]	GO:0043231//intracellular membrane-bounded organelle;GO:0044444//cytoplasmic part	GO:0004753//saccharopine dehydrogenase activity;GO:0036094//small molecule binding	GO:0009746;GO:0009628//response to abiotic stimulus;GO:0034285;GO:0006554//lysine catabolic process;GO:0042743//hydrogen peroxide metabolic process;GO:0003006//developmental process involved in reproduction;GO:0070646//protein modification by small protein removal	lysine-ketoglutarate reductase/saccharopine dehydrogenase bifunctional enzyme [Arabidopsis thaliana]	ath:AT4G33150
gi|166102754|gb|FD535485.1|FD535485	384	440	131	78	354.174	99.5223	54.6035	-1.83136	-2.69739	-0.866027	Down	Down	Down	2.61e-42	5.51e-72	0.000204005	-	-	-	-	-	None
Unigene22059_NAU-YH	1707	724	215	193	131.099	36.7439	30.3935	-1.83508	-2.10882	-0.273742	Down	Down	Down	1.06e-69	4.73e-88	0.170647	K00924|1|4e-86|317|osa:4342410|[EC:2.7.1.-];K07198|3|8e-52|203|ppp:PHYPADRAFT_228852|5'-AMP-activated protein kinase, catalytic alpha subunit [EC:2.7.11.11]	GO:0043231//intracellular membrane-bounded organelle;GO:0005911//cell-cell junction;GO:0016020//membrane	GO:0032550;GO:0004672//protein kinase activity;GO:0005515//protein binding	GO:0006952//defense response;GO:0019932//second-messenger-mediated signaling;GO:0006464//cellular protein modification process;GO:0006796//phosphate-containing compound metabolic process;GO:0006351//transcription, DNA-dependent;GO:0010260//organ senescence	hypothetical protein ARALYDRAFT_486886 [Arabidopsis lyrata subsp. lyrata]	ath:AT5G01820	SR1
gi|166150965|gb|FD582855.1|FD582855	800	277	82	77	107.025	29.9023	25.8737	-1.83962	-2.04839	-0.208771	Down	Down	Down	6.51e-27	1.38e-32	0.605002	K00391|1|5e-35|145|olu:OSTLU_9083|[EC:1.8.4.-];K07305|2|1e-30|131|vcn:VOLCADRAFT_76054|peptide-methionine (R)-S-oxide reductase [EC:1.8.4.12]	GO:0009532//plastid stroma	GO:0043169//cation binding;GO:0016671//oxidoreductase activity, acting on a sulfur group of donors, disulfide as acceptor	GO:0006950//response to stress;GO:0044710;GO:0006091//generation of precursor metabolites and energy	peptide methionine sulfoxide reductase B3 [Arabidopsis thaliana]	ath:AT4G04800	MSRB3
gi|158915856|gb|EX887904.1|EX887904	553	693	205	83	387.349	108.146	40.3469	-1.84066	-3.26311	-1.42245	Down	Down	Down	5.31e-67	6.7e-138	5.09e-14	-	-	GO:0046914//transition metal ion binding	GO:0009653//anatomical structure morphogenesis;GO:0009813//flavonoid biosynthetic process;GO:0007275//multicellular organismal development;GO:0030003//cellular cation homeostasis;GO:0006605//protein targeting;GO:0032535//regulation of cellular component size;GO:0006970//response to osmotic stress;GO:0010038//response to metal ion;GO:0009746;GO:0009626//plant-type hypersensitive response;GO:006091…	metallothionein type 3 [Brassica juncea]	ath:AT3G15353	MT3
gi|154170129|gb|EV541403.1|EV541403	774	541	160	154	216.048	60.3059	53.4856	-1.84098	-2.01413	-0.173147	Down	Down	Down	2.34e-52	5.37e-62	0.514131	-	GO:0043231//intracellular membrane-bounded organelle;GO:0044444//cytoplasmic part	GO:0046914//transition metal ion binding	GO:0010038//response to metal ion;GO:0009267//cellular response to starvation;GO:0000041//transition metal ion transport;GO:0014070//response to organic cyclic compound;GO:0015698//inorganic anion transport;GO:0006721//terpenoid metabolic process;GO:0006694//steroid biosynthetic process;GO:0003006//developmental process involved in reproduction	hypothetical protein ARALYDRAFT_904347 [Arabidopsis lyrata subsp. lyrata]	ath:AT2G01520	MLP328
CL10426.Contig1_NAU-YH	1059	1651	484	217	481.888	133.331	55.0834	-1.85369	-3.12901	-1.27532	Down	Down	Down	4.38e-161	0	1.2e-27	K14504|1|9e-159|557|aly:ARALYDRAFT_918931|xyloglucan:xyloglucosyl transferase TCH4 [EC:2.4.1.207];K08235|3|2e-147|520|aly:ARALYDRAFT_354208|xyloglucan:xyloglucosyl transferase [EC:2.4.1.207]	GO:0030312//external encapsulating structure;GO:0009536//plastid;GO:0005576//extracellular region	GO:0016798//hydrolase activity, acting on glycosyl bonds;GO:0016758//transferase activity, transferring hexosyl groups	GO:0044042//glucan metabolic process;GO:0009725//response to hormone stimulus;GO:0010243//response to organic nitrogen;GO:0071555//cell wall organization;GO:0006950//response to stress;GO:0009605//response to external stimulus	xyloglucosyl transferase 1, partial [Brassica juncea]	ath:AT5G57560	TCH4
gi|166138033|gb|FD569469.1|FD569469	737	484	141	33	202.989	55.8126	12.0366	-1.86274	-4.0759	-2.21316	Down	Down	Down	1.3e-47	4.26e-116	1.08e-17	K06689|1|3e-78|289|aly:ARALYDRAFT_480557|ubiquitin-conjugating enzyme E2 D/E [EC:6.3.2.19]	GO:0043231//intracellular membrane-bounded organelle	GO:0044389;GO:0019787//small conjugating protein ligase activity	GO:0006810//transport;GO:0006511//ubiquitin-dependent protein catabolic process;GO:0001558//regulation of cell growth;GO:0006261//DNA-dependent DNA replication;GO:0043623//cellular protein complex assembly;GO:0003006//developmental process involved in reproduction;GO:0035966//response to topologically incorrect protein	ubiquitin-conjugating enzyme 27 [Arabidopsis lyrata subsp. lyrata]	ath:AT2G16740	UBC29
CL5870.Contig1_NAU-YH	1036	572	164	52	170.66	46.1811	13.4928	-1.88575	-3.66087	-1.77512	Down	Down	Down	3.46e-57	4.05e-126	2.01e-15	K08235|1|1e-138|490|aly:ARALYDRAFT_491722|xyloglucan:xyloglucosyl transferase [EC:2.4.1.207]	GO:0005618//cell wall;GO:0009536//plastid;GO:0005576//extracellular region	GO:0052736;GO:0046527//glucosyltransferase activity	GO:0006073//cellular glucan metabolic process;GO:0009725//response to hormone stimulus;GO:0010243//response to organic nitrogen;GO:0071555//cell wall organization;GO:0010087//phloem or xylem histogenesis;GO:0006950//response to stress;GO:0009605//response to external stimulus	ATXTH18/XTH18 [Arabidopsis lyrata subsp. lyrata]	ath:AT4G30280	XTH18
Unigene28748_NAU-YH	1011	666	190	19	203.619	54.8255	5.05196	-1.89295	-5.33288	-3.43993	Down	Down	Down	6.72e-67	4.8e-188	4.55e-38	K12126|1|9e-12|69.3|aly:ARALYDRAFT_471048|phytochrome-interacting factor 3;K10863|3|3e-06|51.2|aly:ARALYDRAFT_486946|aprataxin [EC:3.-.-.-]	GO:0043231//intracellular membrane-bounded organelle	GO:0003676//nucleic acid binding;GO:0001071//nucleic acid binding transcription factor activity;GO:0005515//protein binding	GO:0009908//flower development;GO:0010467//gene expression	transcription factor bHLH63 [Arabidopsis thaliana]	ath:AT4G34530	CIB1
Unigene8726_NAU-YH	482	194	55	513	124.408	33.2886	30.6742	-1.90198	-2.01999	-0.118006	Down	Down	Down	8.14e-20	1.56e-22	0.790586	-	-	-	-	-	None
gi|158941067|gb|EX903399.1|EX903399	757	319	90	8	130.254	34.6838	2.84087	-1.90899	-5.51885	-3.60986	Down	Down	Down	1.59e-32	2.74e-91	8.26e-19	K01251|1|6e-140|494|ath:AT3G23810|adenosylhomocysteinase [EC:3.3.1.1]	GO:0016020//membrane;GO:0043231//intracellular membrane-bounded organelle;GO:0044444//cytoplasmic part	GO:0046914//transition metal ion binding;GO:0016802;GO:0036094//small molecule binding	GO:0006342//chromatin silencing;GO:0006996//organelle organization;GO:0006970//response to osmotic stress;GO:0070838//divalent metal ion transport;GO:0010608//posttranscriptional regulation of gene expression;GO:0000097//sulfur amino acid biosynthetic process	AT3g23810/MYM9_15 [Arabidopsis thaliana]	ath:AT3G23810	SAHH2
CL396.Contig4_NAU-YH	1739	867	244	241	154.104	40.9327	37.2541	-1.91258	-2.04843	-0.135854	Down	Down	Down	2.77e-88	1.65e-101	0.532684	K08238|1|0.0|806|ath:AT3G62720|xyloglucan 6-xylosyltransferase [EC:2.4.2.39]	GO:0031224//intrinsic to membrane;GO:0043231//intracellular membrane-bounded organelle	GO:0005488//binding;GO:0008194//UDP-glycosyltransferase activity;GO:0042285//xylosyltransferase activity	GO:0065008;GO:0010243//response to organic nitrogen;GO:0043479;GO:0045229//external encapsulating structure organization;GO:0048588//developmental cell growth;GO:0009250//glucan biosynthetic process;GO:0019758;GO:0009826//unidimensional cell growth	xyloglucan 6-xylosyltransferase [Arabidopsis thaliana]	ath:AT3G62720	XT1
CL14029.Contig2_NAU-YH	669	261	73	63	120.589	31.833	25.3146	-1.92151	-2.25206	-0.33055	Down	Down	Down	6.7e-27	1.26e-34	0.405681	K00660|1|1e-63|240|ath:AT5G13930|chalcone synthase [EC:2.3.1.74]	-	GO:0016746//transferase activity, transferring acyl groups	GO:0008152//metabolic process	chalcone synthase 1 protein [Brassica rapa subsp. rapa]	ath:AT5G13930	TT4
CL4823.Contig1_NAU-YH	1132	751	209	103	205.063	53.8617	24.4595	-1.92874	-3.0676	-1.13886	Down	Down	Down	2.4e-77	1.03e-140	3.19e-10	-	GO:0005911//cell-cell junction;GO:0043231//intracellular membrane-bounded organelle;GO:0044444//cytoplasmic part	GO:0046914//transition metal ion binding	GO:0030001//metal ion transport;GO:0003006//developmental process involved in reproduction;GO:0009755//hormone-mediated signaling pathway;GO:0044267//cellular protein metabolic process;GO:0006972//hyperosmotic response;GO:0009692;GO:0044271//cellular nitrogen compound biosynthetic process;GO:0019759;GO:0014070//response to organic cyclic compound;GO:0050790//regulation of catalytic activity	hypothetical protein ARALYDRAFT_897956 [Arabidopsis lyrata subsp. lyrata]	ath:AT3G16430	JAL31
CL8192.Contig1_NAU-YH	5419	23202	6448	4921	1323.43	347.125	244.113	-1.93075	-2.43866	-0.507906	Down	Down	Down	0	0	1.06e-75	-	-	-	-	hypothetical protein MTR_5g051130 [Medicago truncatula]	ath:AT2G01021
CL7598.Contig1_NAU-YH	1592	3697	1027	1061	717.796	188.195	179.155	-1.93135	-2.00236	-0.0710174	Down	Down	Down	0	0	0.497974	K05681|1|5e-40|164|cme:CMS467C|ATP-binding cassette, subfamily G (WHITE), member 2;K12843|2|7e-36|150|vvi:100248403|U4/U6 small nuclear ribonucleoprotein PRP3;K05643|4|8e-09|60.5|olu:OSTLU_42103|ATP-binding cassette, subfamily A (ABC1), member 3	GO:0009526//plastid envelope;GO:0031090//organelle membrane;GO:0005911//cell-cell junction	GO:0046915//transition metal ion transmembrane transporter activity;GO:0016866//intramolecular transferase activity;GO:0017111//nucleoside-triphosphatase activity;GO:0016791//phosphatase activity	GO:0052482;GO:0016104//triterpenoid biosynthetic process;GO:0043405//regulation of MAP kinase activity;GO:0050832//defense response to fungus;GO:0010243//response to organic nitrogen;GO:0009626//plant-type hypersensitive response;GO:0071365//cellular response to auxin stimulus;GO:0006873//cellular ion homeostasis;GO:0042743//hydrogen peroxide metabolic process;GO:0006605//protein targeting;GO:000…	ATPDR7/PDR7 [Arabidopsis lyrata subsp. lyrata]	ath:AT1G15210	PDR7
Unigene24307_NAU-YH	290	126	35	513	134.297	35.2087	0.01	-1.93143	-13.7131	-11.7817	Down	Down	Down	2.76e-13	8.18e-41	1.63e-10	-	-	-	-	hypothetical protein 26.t00003 [Brassica oleracea]	None
Unigene214_NAU-YH	1398	532	146	145	117.625	30.4668	27.8816	-1.94889	-2.07681	-0.127921	Down	Down	Down	1.33e-55	1.84e-63	0.701514	-	GO:0043231//intracellular membrane-bounded organelle	GO:0001071//nucleic acid binding transcription factor activity;GO:0003677//DNA binding	GO:0009725//response to hormone stimulus;GO:0033554//cellular response to stress;GO:0014070//response to organic cyclic compound;GO:0006972//hyperosmotic response;GO:0009404//toxin metabolic process;GO:0006351//transcription, DNA-dependent;GO:0006984//ER-nucleus signaling pathway	heat shock factor 4 [Brassica rapa]	ath:AT4G36990	HSF4
CL3378.Contig2_NAU-YH	714	562	153	111	243.295	62.5135	41.7909	-1.96047	-2.54144	-0.580978	Down	Down	Down	3.43e-59	6.23e-86	0.00746955	K14515|1|5e-26|115|ath:AT5G25350|EIN3-binding F-box protein	-	-	-	EIN3-binding F-box protein 2 [Arabidopsis thaliana]	ath:AT5G25350	EBF2
gnl|UG|Rsa#S42049284	1961	4569	1222	513	720.176	181.792	111.173	-1.98606	-2.69554	-0.709476	Down	Down	Down	0	0	3e-26	K02112|1|0.0|953|aly:ARALYDRAFT_675806|F-type H+-transporting ATPase subunit beta [EC:3.6.3.14]	GO:0033178//proton-transporting two-sector ATPase complex, catalytic domain;GO:0009534//chloroplast thylakoid	GO:0032550;GO:0019829//cation-transporting ATPase activity	GO:0015988//energy coupled proton transmembrane transport, against electrochemical gradient;GO:0015986//ATP synthesis coupled proton transport	H+-transporting two-sector ATPase, alphabeta subunit, central region [Arabidopsis lyrata subs	ath:ArthCp029	atpB
Unigene20474_NAU-YH	1561	2110	560	158	417.806	104.656	27.2089	-1.99717	-3.94068	-1.94351	Down	Down	Down	1.21e-227	0	5.72e-59	-	-	-	-	-	None
Unigene22506_NAU-YH	384	144	38	513	115.911	28.8691	16.8011	-2.00543	-2.7864	-0.780971	Down	Down	Down	7.25e-16	1.46e-24	0.127156	-	GO:0043231//intracellular membrane-bounded organelle	-	-	hypothetical protein [Arabidopsis thaliana]	ath:AT1G14630
Unigene17975_NAU-YH	874	487	128	12	172.231	42.7247	3.69086	-2.01121	-5.54425	-3.53304	Down	Down	Down	4.46e-53	7.64e-140	3.03e-26	-	GO:0005911//cell-cell junction	GO:0005488//binding	GO:0012501//programmed cell death;GO:0071702;GO:0006820//anion transport;GO:0042221//response to chemical stimulus;GO:0010876//lipid localization;GO:0050794//regulation of cellular process;GO:0051716//cellular response to stimulus;GO:0044237//cellular metabolic process;GO:0009814//defense response, incompatible interaction	hypothetical protein ARALYDRAFT_490053 [Arabidopsis lyrata subsp. lyrata]	ath:AT4G12490
gi|167498675|gb|FD980385.1|FD980385	595	569	149	100	295.59	73.055	45.1794	-2.01654	-2.70986	-0.693318	Down	Down	Down	3.35e-62	1.5e-93	0.00142304	-	-	GO:0005488//binding;GO:0016787//hydrolase activity	GO:0007243//intracellular protein kinase cascade;GO:0009626//plant-type hypersensitive response;GO:0010243//response to organic nitrogen;GO:0009627//systemic acquired resistance;GO:0006605//protein targeting;GO:0009696//salicylic acid metabolic process;GO:0019538//protein metabolic process;GO:0009755//hormone-mediated signaling pathway;GO:0010876//lipid localization;GO:0042743//hydrogen peroxide …	protease inhibitor/seed storage/lipid transfer protein family protein [Arabidopsis lyrata subsp. lyrata]	ath:AT5G55450
gi|158945328|gb|EX907868.1|EX907868	699	241	63	11	106.57	26.2932	4.23031	-2.01904	-4.65489	-2.63585	Down	Down	Down	1.58e-26	4.4e-63	7.7e-10	K01626|1|1e-81|300|aly:ARALYDRAFT_472481|3-deoxy-7-phosphoheptulonate synthase [EC:2.5.1.54]	GO:0009536//plastid	GO:0016765//transferase activity, transferring alkyl or aryl (other than methyl) groups	GO:0033554//cellular response to stress;GO:0008652//cellular amino acid biosynthetic process;GO:0009699//phenylpropanoid biosynthetic process;GO:0019632//shikimate metabolic process;GO:0043650;GO:0009814//defense response, incompatible interaction	hypothetical protein ARALYDRAFT_472481 [Arabidopsis lyrata subsp. lyrata]	ath:AT1G22410
CL10542.Contig1_NAU-YH	827	580	151	127	216.779	53.2662	41.2815	-2.02493	-2.39266	-0.367726	Down	Down	Down	9.52e-64	1.37e-82	0.119624	K13648|1|2e-23|107|rcu:RCOM_1468040|alpha-1,4-galacturonosyltransferase [EC:2.4.1.43]	GO:0043231//intracellular membrane-bounded organelle	GO:0008194//UDP-glycosyltransferase activity	GO:0006568//tryptophan metabolic process;GO:0000003//reproduction;GO:0048827//phyllome development;GO:0009755//hormone-mediated signaling pathway;GO:0006605//protein targeting;GO:0003002//regionalization;GO:0010413//glucuronoxylan metabolic process;GO:0009626//plant-type hypersensitive response;GO:0009683;GO:0000097//sulfur amino acid biosynthetic process;GO:0042545//cell wall modification	RecName: Full=Probable galacturonosyltransferase-like 1; AltName: Full=Protein GAOLAOZHUANGREN 1; AltName: Full=Protein PARVUS	ath:AT1G19300	PARVUS
CL10677.Contig2_NAU-YH	804	293	76	21	112.644	27.5764	7.02135	-2.03026	-4.00387	-1.97362	Down	Down	Down	2.02e-32	2.62e-69	1.98e-08	K01530|1|4e-115|298|ath:AT3G25610|phospholipid-translocating ATPase [EC:3.6.3.1]	GO:0031224//intrinsic to membrane;GO:0009526//plastid envelope	GO:0032550;GO:0042625//ATPase activity, coupled to transmembrane movement of ions;GO:0046872//metal ion binding;GO:0005548//phospholipid transporter activity;GO:0008324//cation transmembrane transporter activity;GO:0005515//protein binding	GO:0006811//ion transport;GO:0006869//lipid transport	phospholipid-transporting ATPase 10 [Arabidopsis thaliana]	ath:AT3G25610
CL3855.Contig2_NAU-YH	822	2310	585	114	868.63	207.618	37.2812	-2.06481	-4.54222	-2.47741	Down	Down	Down	2.13e-260	0	1.25e-83	-	-	-	-	hypothetical protein ARALYDRAFT_487523 [Arabidopsis lyrata subsp. lyrata]	ath:AT5G07030
CL1992.Contig1_NAU-YH	1566	1288	325	306	254.225	60.5441	52.5275	-2.07005	-2.27496	-0.204914	Down	Down	Down	1.28e-145	2.08e-172	0.219914	K05280|1|3e-81|301|rcu:RCOM_1469920|flavonoid 3'-monooxygenase [EC:1.14.13.21];K00517|2|3e-80|297|osa:4348172|[EC:1.14.-.-]	GO:0005911//cell-cell junction;GO:0031090//organelle membrane;GO:0030312//external encapsulating structure;GO:0009536//plastid	GO:0046906//tetrapyrrole binding;GO:0046914//transition metal ion binding;GO:0004497//monooxygenase activity;GO:0016705//oxidoreductase activity, acting on paired donors, with incorporation or reduction of molecular oxygen	GO:0044710	hypothetical protein ARALYDRAFT_354499 [Arabidopsis lyrata subsp. lyrata]	ath:AT4G22690	CYP706A1
gi|161531618|gb|EY903641.1|EY903641	650	2134	538	319	1014.79	241.462	131.927	-2.07131	-2.94337	-0.872056	Down	Down	Down	1.63e-241	0	1.21e-16	-	GO:0005911//cell-cell junction;GO:0009536//plastid;GO:0005576//extracellular region;GO:0031090//organelle membrane;GO:0042995//cell projection	GO:0015631//tubulin binding	GO:0010119//regulation of stomatal movement;GO:0009414//response to water deprivation;GO:0009755//hormone-mediated signaling pathway;GO:0048878//chemical homeostasis;GO:0000904//cell morphogenesis involved in differentiation;GO:0010038//response to metal ion;GO:0007019//microtubule depolymerization;GO:0016049//cell growth;GO:0000087//M phase of mitotic cell cycle;GO:0035264//multicellular organis…	RecName: Full=Translationally-controlled tumor protein homolog; Short=TCTP	ath:AT3G16640	TCTP
gi|166097946|gb|FD530489.1|FD530489	752	303	76	26	124.543	29.4833	9.29421	-2.07867	-3.74417	-1.66549	Down	Down	Down	1.5e-34	5.09e-68	8.63e-07	K07374|1|3e-96|349|aly:ARALYDRAFT_474136|tubulin alpha	GO:0031981//nuclear lumen;GO:0005911//cell-cell junction;GO:0015630//microtubule cytoskeleton;GO:0009532//plastid stroma;GO:0043234//protein complex;GO:0031090//organelle membrane;GO:0030312//external encapsulating structure	GO:0005198//structural molecule activity;GO:0032550;GO:0017111//nucleoside-triphosphatase activity	GO:0007010//cytoskeleton organization;GO:0051603//proteolysis involved in cellular protein catabolic process;GO:0032989;GO:0040007//growth;GO:0006928//cellular component movement;GO:0009629//response to gravity;GO:0016192//vesicle-mediated transport;GO:0006970//response to osmotic stress;GO:0006637//acyl-CoA metabolic process;GO:0010038//response to metal ion;GO:0006006//glucose metabolic process…	tubulin alpha-6 chain [Arabidopsis thaliana]	ath:AT1G50010	TUA2
Unigene30481_NAU-YH	703	628	157	158	276.121	65.1516	60.417	-2.08343	-2.19227	-0.108846	Down	Down	Down	1.3e-71	2.85e-80	0.701034	-	-	-	-	hypothetical protein [Arabidopsis thaliana]	ath:AT3G23170
Unigene12793_NAU-YH	832	649	162	105	241.111	56.8031	33.9253	-2.08565	-2.82926	-0.74361	Down	Down	Down	4.15e-74	8.08e-112	0.000309494	-	GO:0043231//intracellular membrane-bounded organelle	-	-	hypothetical protein ARALYDRAFT_496217 [Arabidopsis lyrata subsp. lyrata]	ath:AT5G60680
Unigene15549_NAU-YH	319	331	82	42	320.725	74.99	35.3929	-2.09656	-3.1798	-1.08324	Down	Down	Down	3.92e-38	3.04e-64	0.000458856	-	-	-	-	-	None
Unigene21446_NAU-YH	883	563	137	13	197.08	45.2627	3.95767	-2.12239	-5.63799	-3.5156	Down	Down	Down	9.25e-66	6.36e-163	5.72e-28	K07304|1|6e-80|295|gmx:100804748|peptide-methionine (S)-S-oxide reductase [EC:1.8.4.11]	GO:0009536//plastid	GO:0016671//oxidoreductase activity, acting on a sulfur group of donors, disulfide as acceptor	GO:0006979//response to oxidative stress;GO:0036211;GO:0009628//response to abiotic stimulus;GO:0044710	peptide methionine sulfoxide reductase [Arabidopsis arenosa]	ath:AT5G07460	PMSR2
gi|161570651|gb|EY942306.1|EY942306	830	793	191	183	295.318	67.133	59.2694	-2.13718	-2.31691	-0.179735	Down	Down	Down	2e-93	1.45e-108	0.454647	K02997|1|2e-92|336|aly:ARALYDRAFT_494005|small subunit ribosomal protein S9e	-	-	-	40S ribosomal protein S9 [Arabidopsis lyrata subsp. lyrata]	ath:AT5G39850
CL234.Contig1_NAU-YH	1148	587	140	95	158.049	35.5768	22.2453	-2.15136	-2.8288	-0.677433	Down	Down	Down	9.39e-70	3.97e-101	0.00273312	K09338|1|4e-104|376|aly:ARALYDRAFT_494245|homeobox-leucine zipper protein	GO:0043231//intracellular membrane-bounded organelle	GO:0001071//nucleic acid binding transcription factor activity;GO:0042802//identical protein binding;GO:0003677//DNA binding	GO:0006351//transcription, DNA-dependent;GO:0009888//tissue development;GO:0048438//floral whorl development;GO:0009639//response to red or far red light;GO:0009755//hormone-mediated signaling pathway;GO:0000902//cell morphogenesis;GO:0022622//root system development	homeobox-leucine zipper protein, putative [Brassica oleracea]	ath:AT5G47370	HAT2
Unigene25654_NAU-YH	1230	442	105	24	111.074	24.9037	5.24522	-2.15709	-4.40437	-2.24729	Down	Down	Down	9.76e-53	6.94e-112	1.68e-13	K06892|1|6e-149|525|aly:ARALYDRAFT_473661|	GO:0044424//intracellular part	GO:0046914//transition metal ion binding;GO:0016705//oxidoreductase activity, acting on paired donors, with incorporation or reduction of molecular oxygen	GO:0009820//alkaloid metabolic process;GO:0044710	oxidoreductase [Arabidopsis lyrata subsp. lyrata]	ath:AT3G46490
CL7961.Contig1_NAU-YH	889	593	140	97	206.181	45.9417	29.331	-2.16603	-2.81341	-0.647376	Down	Down	Down	4.49e-71	1.45e-101	0.0043503	-	-	-	-	hypothetical protein [Arabidopsis thaliana]	ath:AT1G70780
gi|167499699|gb|FD984842.1|FD984842	684	382	89	75	172.624	37.959	29.4756	-2.18512	-2.55004	-0.364921	Down	Down	Down	2.43e-46	1.15e-58	0.272365	-	GO:0005911//cell-cell junction;GO:0005618//cell wall;GO:0044444//cytoplasmic part	-	GO:0048646//anatomical structure formation involved in morphogenesis;GO:0000902//cell morphogenesis;GO:0009827//plant-type cell wall modification	expansin A1 [Raphanus sativus]	ath:AT2G39700	EXPA4
CL1925.Contig1_NAU-YH	1165	1225	285	272	325.016	71.3673	62.7625	-2.18718	-2.37254	-0.185361	Down	Down	Down	1.31e-148	1.22e-172	0.320933	K01183|1|2e-174|610|ath:AT3G12500|chitinase [EC:3.2.1.14]	GO:0043231//intracellular membrane-bounded organelle;GO:0044444//cytoplasmic part;GO:0031090//organelle membrane	GO:0004553//hydrolase activity, hydrolyzing O-glycosyl compounds;GO:0097367//carbohydrate derivative binding	GO:0044238//primary metabolic process;GO:0010038//response to metal ion;GO:0006026;GO:0009861//jasmonic acid and ethylene-dependent systemic resistance;GO:0015698//inorganic anion transport;GO:0044036//cell wall macromolecule metabolic process	RecName: Full=Endochitinase CH25; Flags: Precursor	ath:AT3G12500	HCHIB
Unigene24520_NAU-YH	1687	682	157	62	124.958	27.1497	9.87947	-2.20244	-3.66087	-1.45843	Down	Down	Down	1.82e-83	2.13e-150	3.16e-11	K09874|1|8e-131|465|aly:ARALYDRAFT_911337|aquaporin NIP	GO:0031224//intrinsic to membrane;GO:0044459//plasma membrane part	GO:0015103//inorganic anion transmembrane transporter activity;GO:0005372//water transmembrane transporter activity;GO:0015563	GO:0010035//response to inorganic substance;GO:0009267//cellular response to starvation;GO:0071702;GO:0000041//transition metal ion transport;GO:0010036//response to boron-containing substance;GO:0071705;GO:0015698//inorganic anion transport;GO:0034220//ion transmembrane transport	hypothetical protein ARALYDRAFT_911337 [Arabidopsis lyrata subsp. lyrata]	ath:AT4G10380	NIP5;1
Unigene19392_NAU-YH	599	272	61	53	140.358	29.7087	23.7852	-2.24015	-2.56098	-0.320823	Down	Down	Down	4.25e-34	5.03e-42	0.465472	K05658|1|2e-70|262|aly:ARALYDRAFT_484610|ATP-binding cassette, subfamily B (MDR/TAP), member 1	GO:0031224//intrinsic to membrane	GO:0032550;GO:0042626//ATPase activity, coupled to transmembrane movement of substances	GO:0009154//purine ribonucleotide catabolic process;GO:0044763;GO:0051234//establishment of localization	abc transporter family protein [Arabidopsis lyrata subsp. lyrata]	ath:AT3G28415
CL8119.Contig2_NAU-YH	1023	1451	325	256	438.416	92.6805	67.27	-2.24196	-2.70427	-0.462302	Down	Down	Down	1.34e-181	4.62e-238	0.00100829	-	-	-	-	glycine-rich_protein_(aa1-291) [Brassica napus]	None
gi|154094348|gb|EV527321.1|EV527321	636	864	190	171	419.905	87.1519	72.2763	-2.26846	-2.53847	-0.270009	Down	Down	Down	1.08e-109	6.54e-132	0.223073	-	-	-	-	Methyltransferase-related protein [Arabidopsis thaliana]	ath:AT5G58375
Unigene1975_NAU-YH	818	549	117	21	207.45	41.7266	6.90118	-2.31373	-4.90978	-2.59605	Down	Down	Down	2.01e-71	1.7e-148	9.89e-18	-	-	-	-	-	None
CL8800.Contig1_NAU-YH	614	770	164	120	387.63	77.9213	52.5376	-2.31459	-2.88326	-0.568667	Down	Down	Down	3.3e-100	2.28e-135	0.00637027	-	-	-	-	hypothetical protein [Arabidopsis thaliana]	ath:AT2G01580
gi|332786951|gb|FY442089.1|FY442089	853	307	65	1	111.246	22.2303	0.315143	-2.32316	-8.46353	-6.14037	Down	Down	Down	3.38e-40	2.3e-98	2.69e-18	-	GO:0009532//plastid stroma;GO:0009526//plastid envelope	-	GO:0006007//glucose catabolic process;GO:0010038//response to metal ion;GO:0006970//response to osmotic stress;GO:0019758	translational inhibitor protein like [Arabidopsis thaliana]	ath:AT3G20390
CL7645.Contig3_NAU-YH	1504	4201	880	241	863.375	170.693	43.0751	-2.33859	-4.32506	-1.98648	Down	Down	Down	0	0	1.99e-95	K00430|1|9e-161|565|ath:AT2G38390|peroxidase [EC:1.11.1.7]	GO:0005618//cell wall;GO:0043231//intracellular membrane-bounded organelle;GO:0044444//cytoplasmic part;GO:0031090//organelle membrane;GO:0005576//extracellular region	GO:0043169//cation binding;GO:0046906//tetrapyrrole binding;GO:0016209//antioxidant activity;GO:0003824//catalytic activity	GO:0009314//response to radiation;GO:0010038//response to metal ion;GO:0044710;GO:0052166;GO:0000902//cell morphogenesis;GO:0006970//response to osmotic stress;GO:0044237//cellular metabolic process	peroxidase precursor [Raphanus sativus var. niger]	ath:AT2G38390
gi|167452259|gb|FD954899.1|FD954899	366	206	43	29	173.973	34.2742	21.2997	-2.34366	-3.02995	-0.68629	Down	Down	Down	2.41e-27	3.58e-38	0.154915	-	-	-	-	-	None
CL48.Contig1_NAU-YH	607	461	96	8	234.751	46.1385	3.5429	-2.34709	-6.05006	-3.70297	Down	Down	Down	4.86e-61	4.93e-137	1.8e-20	K00430|1|3e-76|282|ath:AT2G18150|peroxidase [EC:1.11.1.7]	GO:0030312//external encapsulating structure	GO:0003824//catalytic activity;GO:0016209//antioxidant activity;GO:0043169//cation binding;GO:0046906//tetrapyrrole binding	GO:0044710;GO:0051707//response to other organism;GO:0006950//response to stress	putative peroxidase [Arabidopsis thaliana]	ath:AT2G18150
gi|166151194|gb|FD582499.1|FD582499	823	3137	649	503	1178.17	230.052	164.295	-2.35652	-2.84219	-0.485666	Down	Down	Down	0	0	2.17e-07	-	GO:0005911//cell-cell junction;GO:0009536//plastid;GO:0005576//extracellular region;GO:0031090//organelle membrane;GO:0042995//cell projection	GO:0015631//tubulin binding	GO:0010119//regulation of stomatal movement;GO:0009414//response to water deprivation;GO:0009755//hormone-mediated signaling pathway;GO:0048878//chemical homeostasis;GO:0000904//cell morphogenesis involved in differentiation;GO:0010038//response to metal ion;GO:0007019//microtubule depolymerization;GO:0016049//cell growth;GO:0000087//M phase of mitotic cell cycle;GO:0035264//multicellular organis…	RecName: Full=Translationally-controlled tumor protein homolog; Short=TCTP	ath:AT3G16640	TCTP
gi|167442185|gb|FD945367.1|FD945367	746	911	188	94	377.463	73.519	33.8724	-2.36015	-3.47815	-1.11801	Down	Down	Down	2.14e-121	2.95e-192	5.5e-09	K13680|1|6e-15|79.3|bdi:100837081|beta-mannan synthase [EC:2.4.1.32]	GO:0016020//membrane;GO:0043231//intracellular membrane-bounded organelle	GO:0046527//glucosyltransferase activity;GO:0005488//binding	-	xyloglucan glycosyltransferase 4 [Arabidopsis thaliana]	ath:AT3G28180	CSLC04
gi|156157508|gb|EW717654.1|EW717654	452	548	113	12	374.746	72.9324	7.13674	-2.36128	-5.7145	-3.35322	Down	Down	Down	4.48e-73	1.85e-159	3.84e-22	K15748|1|2e-25|105|aly:ARALYDRAFT_474364|beta-D-glucopyranosyl abscisate beta-glucosidase [EC:3.2.1.175];K01238|3|7e-17|84.3|ath:AT5G24550|[EC:3.2.1.-];K01188|4|1e-15|80.1|rcu:RCOM_1621030|beta-glucosidase [EC:3.2.1.21]	GO:0005911//cell-cell junction;GO:0009536//plastid;GO:0042579//microbody	GO:0046914//transition metal ion binding;GO:0008422//beta-glucosidase activity;GO:0019899//enzyme binding	GO:0006066//alcohol metabolic process;GO:0009651//response to salt stress;GO:0010118//stomatal movement;GO:0048878//chemical homeostasis;GO:0009698//phenylpropanoid metabolic process;GO:0006996//organelle organization;GO:0044238//primary metabolic process;GO:0043623//cellular protein complex assembly;GO:0009409//response to cold;GO:0009738//abscisic acid mediated signaling pathway;GO:0006952//def…	beta-glucosidase, partial [Brassica nigra]	ath:AT3G09260	PYK10
Unigene14616_NAU-YH	254	103	21	513	125.342	24.1194	20.1084	-2.37761	-2.64001	-0.262396	Down	Down	Down	4.39e-14	1.08e-16	0.701636	-	-	-	GO:0001666//response to hypoxia	TIR-NBS-LRR class disease resistance protein [Arabidopsis thaliana]	ath:AT4G19520
CL1834.Contig4_NAU-YH	573	257	52	54	138.635	26.4746	25.3336	-2.38861	-2.45217	-0.063558	Down	Down	Down	7.97e-35	8.89e-38	0.906929	K14488|1|4e-46|182|ath:AT3G12830|SAUR family protein	-	-	GO:0009725//response to hormone stimulus	SAUR-like auxin-responsive protein [Arabidopsis thaliana]	ath:AT3G12830
Unigene5953_NAU-YH	592	4028	811	3	2103.11	399.65	1.36225	-2.39572	-10.5923	-8.1966	Down	Down	Down	0	0	1.56e-249	-	-	-	-	defensin-like protein 197 [Arabidopsis thaliana]	ath:AT2G43550
CL1674.Contig1_NAU-YH	1210	768	143	88	196.187	34.4771	19.5503	-2.50852	-3.32696	-0.818446	Down	Down	Down	5.47e-110	1.18e-155	0.000220235	K01507|1|4e-153|539|ath:AT5G09650|inorganic pyrophosphatase [EC:3.6.1.1]	GO:0009532//plastid stroma;GO:0009526//plastid envelope	GO:0016462//pyrophosphatase activity;GO:0046872//metal ion binding	GO:0009696//salicylic acid metabolic process;GO:0007243//intracellular protein kinase cascade;GO:0006793//phosphorus metabolic process;GO:0010243//response to organic nitrogen;GO:0009755//hormone-mediated signaling pathway;GO:0042743//hydrogen peroxide metabolic process;GO:0006605//protein targeting;GO:0006091//generation of precursor metabolites and energy;GO:0006970//response to osmotic stress;…	soluble inorganic pyrophosphatase 1 [Arabidopsis thaliana]	ath:AT5G09650	PPa6
Unigene30483_NAU-YH	1401	1274	237	73	281.078	49.3504	14.0069	-2.50983	-4.32676	-1.81692	Down	Down	Down	1.26e-182	0	7.23e-23	K00514|1|1e-19|96.3|rcu:RCOM_1428040|zeta-carotene desaturase [EC:1.3.5.6];K01206|2|3e-15|81.6|ath:AT1G67830|alpha-L-fucosidase [EC:3.2.1.51]	GO:0005911//cell-cell junction;GO:0005840//ribosome;GO:0042579//microbody;GO:0005576//extracellular region;GO:0031090//organelle membrane;GO:0009526//plastid envelope	GO:0016787//hydrolase activity	GO:0051707//response to other organism;GO:0006007//glucose catabolic process;GO:0006090//pyruvate metabolic process;GO:0019758;GO:0005982//starch metabolic process;GO:0019759;GO:0006952//defense response	hypothetical protein ARALYDRAFT_474528 [Arabidopsis lyrata subsp. lyrata]	ath:AT1G54010
gi|332778009|gb|FY442416.1|FY442416	800	2691	499	170	1039.73	181.966	57.1237	-2.51446	-4.18597	-1.67151	Down	Down	Down	0	0	1.18e-42	-	GO:0043231//intracellular membrane-bounded organelle;GO:0044444//cytoplasmic part	GO:0046914//transition metal ion binding	GO:0010038//response to metal ion;GO:0009267//cellular response to starvation;GO:0000041//transition metal ion transport;GO:0014070//response to organic cyclic compound;GO:0015698//inorganic anion transport;GO:0006694//steroid biosynthetic process;GO:0003006//developmental process involved in reproduction	hypothetical protein ARALYDRAFT_904347 [Arabidopsis lyrata subsp. lyrata]	ath:AT2G01520	MLP328
Unigene30391_NAU-YH	886	6370	1179	132	2222.29	388.204	40.0495	-2.51716	-5.79412	-3.27696	Down	Down	Down	0	0	5.77e-227	-	GO:0005773//vacuole	GO:0004553//hydrolase activity, hydrolyzing O-glycosyl compounds;GO:0004518//nuclease activity;GO:0097367//carbohydrate derivative binding	GO:0010035//response to inorganic substance;GO:0009725//response to hormone stimulus;GO:0006970//response to osmotic stress;GO:0015698//inorganic anion transport;GO:0050832//defense response to fungus;GO:0044036//cell wall macromolecule metabolic process;GO:0009814//defense response, incompatible interaction	hypothetical protein ARALYDRAFT_477741 [Arabidopsis lyrata subsp. lyrata]	ath:AT3G04720	PR4
CL13925.Contig3_NAU-YH	412	479	87	32	359.363	61.6031	20.879	-2.54437	-4.10532	-1.56095	Down	Down	Down	9.76e-70	1.68e-115	4.64e-07	K09757|1|2e-07|52.4|ath:AT2G22990|serine carboxypeptidase-like 8 [EC:3.4.16.- 2.3.1.92]	-	-	-	serine carboxypeptidase-like 13 [Arabidopsis thaliana]	None
gi|332770554|gb|FY430574.1|FY430574	852	674	121	22	244.52	41.4311	6.94129	-2.56117	-5.13861	-2.57744	Down	Down	Down	7.29e-99	7.21e-187	3.48e-18	K05907|1|8e-122|434|ath:AT4G21990|adenylyl-sulfate reductase (glutathione) [EC:1.8.4.9]	GO:0009532//plastid stroma;GO:0031976	GO:0016671//oxidoreductase activity, acting on a sulfur group of donors, disulfide as acceptor	GO:0000097//sulfur amino acid biosynthetic process;GO:0009683;GO:0000103//sulfate assimilation;GO:0019725//cellular homeostasis;GO:0019758	APS reductase [Brassica juncea]	ath:AT4G04610	APR1
Unigene5878_NAU-YH	1262	1629	285	217	398.985	65.8819	46.2229	-2.59838	-3.10965	-0.511273	Down	Down	Down	4.97e-243	0	0.000687117	K00430|1|2e-143|506|ath:AT5G58390|peroxidase [EC:1.11.1.7]	GO:0005576//extracellular region;GO:0030312//external encapsulating structure	GO:0003824//catalytic activity;GO:0016209//antioxidant activity;GO:0043169//cation binding;GO:0046906//tetrapyrrole binding	GO:0044710;GO:0006950//response to stress	peroxidase 67 [Arabidopsis thaliana]	ath:AT5G58390
gi|332770530|gb|FY430550.1|FY430550	750	335	58	15	138.063	22.5604	5.37635	-2.61346	-4.68256	-2.0691	Down	Down	Down	2.65e-50	4.47e-88	6.31e-07	K01802|1|1e-82|304|ath:AT4G38740|peptidylprolyl isomerase [EC:5.2.1.8]	GO:0016020//membrane;GO:0005576//extracellular region;GO:0044444//cytoplasmic part	GO:0016859//cis-trans isomerase activity	GO:0048511//rhythmic process;GO:0007602//phototransduction;GO:0018208//peptidyl-proline modification;GO:0006468//protein phosphorylation;GO:0043401//steroid hormone mediated signaling pathway;GO:0010038//response to metal ion;GO:0030522//intracellular receptor mediated signaling pathway;GO:0000097//sulfur amino acid biosynthetic process;GO:0006950//response to stress	hypothetical protein ARALYDRAFT_490638 [Arabidopsis lyrata subsp. lyrata]	ath:AT4G38740	ROC1
CL13762.Contig1_NAU-YH	776	324	54	24	129.056	20.3008	8.31394	-2.66839	-3.95632	-1.28793	Down	Down	Down	8.61e-50	5.73e-76	0.00131437	K00924|1|2e-30|130|ath:AT1G28440|[EC:2.7.1.-];K08286|3|3e-29|126|ath:AT4G28490|protein-serine/threonine kinase [EC:2.7.11.-]	GO:0031224//intrinsic to membrane	GO:0032550;GO:0004672//protein kinase activity;GO:0016628//oxidoreductase activity, acting on the CH-CH group of donors, NAD or NADP as acceptor	GO:0044710;GO:0009725//response to hormone stimulus;GO:0007167//enzyme linked receptor protein signaling pathway;GO:0006464//cellular protein modification process	hypothetical protein ARALYDRAFT_483263 [Arabidopsis lyrata subsp. lyrata]	ath:AT2G41820
CL8144.Contig1_NAU-YH	289	182	30	513	194.656	30.2833	25.1144	-2.68433	-2.95434	-0.270009	Down	Down	Down	3.08e-28	6.62e-33	0.677257	K09338|1|5e-25|110|ath:AT4G40060|homeobox-leucine zipper protein	GO:0043231//intracellular membrane-bounded organelle	GO:0001071//nucleic acid binding transcription factor activity;GO:0042802//identical protein binding;GO:0003677//DNA binding	GO:0006351//transcription, DNA-dependent;GO:0009414//response to water deprivation;GO:0042743//hydrogen peroxide metabolic process;GO:0009648//photoperiodism;GO:0006970//response to osmotic stress;GO:0048506;GO:0009738//abscisic acid mediated signaling pathway;GO:0016049//cell growth	homeobox-leucine zipper protein ATHB-16 [Arabidopsis thaliana]	ath:AT4G40060	HB16
gi|166124288|gb|FD558331.1|FD558331	366	202	33	0	170.595	26.3035	0.01	-2.69725	-14.0583	-11.361	Down	Down	Down	1.75e-31	7.27e-66	6.63e-10	K01051|1|3e-13|71.6|vvi:100255703|pectinesterase [EC:3.1.1.11]	GO:0043231//intracellular membrane-bounded organelle;GO:0030312//external encapsulating structure	GO:0052689;GO:0030234//enzyme regulator activity	GO:0009813//flavonoid biosynthetic process;GO:0006605//protein targeting;GO:0006970//response to osmotic stress;GO:0044092//negative regulation of molecular function;GO:0009746;GO:0009626//plant-type hypersensitive response;GO:0000272//polysaccharide catabolic process;GO:0042044//fluid transport;GO:0071555//cell wall organization	RecName: Full=Probable pectinesterase/pectinesterase inhibitor 61; Includes: RecName: Full=Pectinesterase inhibitor 61; AltName: Full=Pectin methylesterase inhibitor 61; Includes: RecName: Full=Pectinesterase 61; Short=PE 61; AltName: Full=AtPMEpcrF; AltName: Full=Pectin methylesterase 61; Short=AtPME61	ath:AT5G53370	PMEPCRF
CL11471.Contig1_NAU-YH	1380	842	133	0	188.594	28.116	0.01	-2.74582	-14.203	-11.4572	Down	Down	Down	1.7e-133	7.06e-278	3.66e-41	K12811|1|9e-06|50.1|ppp:PHYPADRAFT_149955|ATP-dependent RNA helicase DDX46/PRP5 [EC:3.6.4.13]	-	-	-	-	None
Unigene19242_NAU-YH	1234	1008	159	108	252.488	37.5891	23.527	-2.74783	-3.42383	-0.676001	Down	Down	Down	5.78e-160	8.89e-210	0.00123315	-	-	-	-	F-box family protein [Arabidopsis lyrata subsp. lyrata]	ath:AT1G78100
CL3370.Contig1_NAU-YH	1000	637	100	76	196.895	29.173	20.4301	-2.75472	-3.26866	-0.513935	Down	Down	Down	2.46e-101	5.88e-127	0.076666	K09286|1|4e-81|299|ath:AT4G17500|EREBP-like factor;K14517|2|6e-53|206|ath:AT5G47220|ethylene-responsive transcription factor 2	GO:0005635//nuclear envelope	GO:0001071//nucleic acid binding transcription factor activity;GO:0003676//nucleic acid binding	GO:0006351//transcription, DNA-dependent;GO:0010243//response to organic nitrogen;GO:0009755//hormone-mediated signaling pathway;GO:0006972//hyperosmotic response;GO:0009692;GO:0002252;GO:0000160//two-component signal transduction system (phosphorelay);GO:0002218//activation of innate immune response	ethylene responsive element binding factor 1 [Arabidopsis thaliana]	ath:AT4G17500	ERF-1
gi|166135297|gb|FD567168.1|FD567168	772	301	47	25	120.516	17.7607	8.70522	-2.76246	-3.7912	-1.02874	Down	Down	Down	4.79e-48	2.97e-68	0.0180083	K03263|1|2e-84|310|ath:AT1G69410|translation initiation factor 5A	GO:0044424//intracellular part	GO:0043021//ribonucleoprotein complex binding;GO:0008135//translation factor activity, nucleic acid binding	GO:0010087//phloem or xylem histogenesis;GO:0006414//translational elongation;GO:0006415//translational termination;GO:0018205//peptidyl-lysine modification	translation initiation factor eIF-5A [Arabidopsis thaliana]	ath:AT1G69410	ELF5A-3
CL5028.Contig1_NAU-YH	270	90	14	513	103.032	15.1267	4.9781	-2.76793	-4.37136	-1.60343	Down	Down	Down	1.39e-14	1.13e-22	0.098217	-	-	-	-	-	None
Unigene15534_NAU-YH	282	195	30	513	213.737	31.0351	5.71952	-2.78387	-5.2238	-2.43993	Down	Down	Down	1.9e-31	2.66e-54	0.000150038	-	-	-	-	-	None
Unigene22900_NAU-YH	2245	1226	187	89	168.799	24.3	10.6569	-2.79628	-3.98544	-1.18917	Down	Down	Down	2.63e-198	1.37e-289	8.07e-10	K05349|1|0.0|1249|aly:ARALYDRAFT_470222|beta-glucosidase [EC:3.2.1.21]	GO:0005618//cell wall;GO:0005576//extracellular region	GO:0015926//glucosidase activity	GO:0003006//developmental process involved in reproduction;GO:0042221//response to chemical stimulus;GO:0044238//primary metabolic process	hypothetical protein ARALYDRAFT_470222 [Arabidopsis lyrata subsp. lyrata]	ath:AT1G02640	BXL2
gi|161563271|gb|EY935034.1|EY935034	879	611	93	66	214.856	30.8656	20.1842	-2.7993	-3.41207	-0.612771	Down	Down	Down	6.84e-99	1.05e-126	0.0380417	-	-	-	-	hypothetical protein [Arabidopsis thaliana]	ath:AT1G28400
gi|158923484|gb|EX896206.1|EX896206	505	165	25	513	100.992	14.4421	4.7908	-2.80589	-4.39783	-1.59194	Down	Down	Down	7.3e-27	1.18e-41	0.0158852	-	-	-	-	-	None
Unigene15568_NAU-YH	420	139	21	513	102.296	14.5865	1.92012	-2.81005	-5.73541	-2.92536	Down	Down	Down	1.07e-22	2.87e-40	0.000628407	-	GO:0005576//extracellular region;GO:0030312//external encapsulating structure	GO:0004553//hydrolase activity, hydrolyzing O-glycosyl compounds	GO:0009696//salicylic acid metabolic process;GO:0007243//intracellular protein kinase cascade;GO:0010243//response to organic nitrogen;GO:0009755//hormone-mediated signaling pathway;GO:0042743//hydrogen peroxide metabolic process;GO:0006605//protein targeting;GO:0006091//generation of precursor metabolites and energy;GO:0044238//primary metabolic process;GO:0009626//plant-type hypersensitive resp…	glucanase 1 [Brassica rapa subsp. pekinensis]	ath:AT3G57240	BG3
Unigene938_NAU-YH	879	292	44	21	102.681	14.6031	6.42226	-2.81382	-3.99894	-1.18512	Down	Down	Down	1.54e-47	5.24e-69	0.00893836	K11821|1|3e-134|476|ath:AT1G74100|desulfoglucosinolate sulfotransferase A/B/C [EC:2.8.2.-];K01014|3|2e-10|64.3|olu:OSTLU_32551|aryl sulfotransferase [EC:2.8.2.1]	-	GO:0047364//desulfoglucosinolate sulfotransferase activity	GO:0006568//tryptophan metabolic process;GO:0009755//hormone-mediated signaling pathway;GO:0009753//response to jasmonic acid stimulus;GO:0006972//hyperosmotic response;GO:0019758;GO:0009683;GO:0000097//sulfur amino acid biosynthetic process;GO:0006952//defense response	ST5a [Brassica rapa subsp. chinensis]	ath:AT1G74100	SOT16
CL8625.Contig1_NAU-YH	826	2947	412	261	1102.8	145.512	84.9411	-2.92196	-3.69856	-0.7766	Down	Down	Down	0	0	1.33e-10	-	-	-	-	hypothetical protein [Arabidopsis thaliana]	ath:AT1G78020
Unigene30103_NAU-YH	323	111	15	513	106.222	13.5478	0.01	-2.97095	-13.3748	-10.4038	Down	Down	Down	3.08e-19	6.95e-36	0.000164455	-	GO:0005911//cell-cell junction;GO:0043231//intracellular membrane-bounded organelle	GO:0005488//binding	GO:0044699;GO:0006950//response to stress	jacalin lectin family protein [Arabidopsis lyrata subsp. lyrata]	ath:AT2G39310	JAL22
CL496.Contig1_NAU-YH	1655	721	96	69	134.658	16.9221	11.2075	-2.99232	-3.58676	-0.594444	Down	Down	Down	4.12e-125	2.79e-156	0.0406851	K04733|1|5e-67|253|smo:SELMODRAFT_159261|interleukin-1 receptor-associated kinase 4 [EC:2.7.11.1];K13416|3|3e-64|244|ath:AT4G33430|brassinosteroid insensitive 1-associated receptor kinase 1 [EC:2.7.10.1 2.7.11.1];K05658|5|3e-63|241|vvi:100262734|ATP-binding cassette, subfamily B (MDR/TAP), member 1	GO:0016020//membrane	GO:0004672//protein kinase activity;GO:0032550	GO:0006464//cellular protein modification process	Leucine-rich repeat transmembrane protein kinase [Arabidopsis thaliana]	ath:AT1G29720	LRR
gi|332780746|gb|FY444322.1|FY444322	792	347	46	11	135.425	16.9439	3.73357	-2.99866	-5.18079	-2.18214	Down	Down	Down	2.52e-60	1.97e-96	5.97e-06	-	-	-	-	germin-like protein subfamily 2 member 4 [Arabidopsis thaliana]	ath:AT3G62020	GLP10
CL3212.Contig1_NAU-YH	1045	468	59	28	138.428	16.4709	7.20276	-3.07115	-4.26444	-1.19329	Down	Down	Down	2.49e-83	6.26e-116	0.001618	-	GO:0043231//intracellular membrane-bounded organelle	-	GO:0000302//response to reactive oxygen species;GO:0006972//hyperosmotic response;GO:0009642//response to light intensity	HSP20-like chaperone [Arabidopsis thaliana]	ath:AT5G02480
gi|156160681|gb|EW720827.1|EW720827	745	787	97	25	326.523	37.9836	9.02071	-3.10374	-5.1778	-2.07406	Down	Down	Down	1.15e-141	4.09e-219	2.49e-11	-	-	-	-	hypothetical protein ARALYDRAFT_470261 [Arabidopsis lyrata subsp. lyrata]	ath:AT1G02900	RALF1
gi|166102193|gb|FD533934.1|FD533934	726	794	93	61	338.048	37.3703	22.5866	-3.17726	-3.90369	-0.726427	Down	Down	Down	3.26e-146	1.76e-184	0.0120638	-	GO:0009536//plastid	GO:0005488//binding	GO:0007243//intracellular protein kinase cascade;GO:0009267//cellular response to starvation;GO:0042742//defense response to bacterium;GO:0009416//response to light stimulus;GO:0009627//systemic acquired resistance;GO:0009696//salicylic acid metabolic process;GO:0042743//hydrogen peroxide metabolic process;GO:0031347//regulation of defense response	hypothetical protein ARALYDRAFT_486111 [Arabidopsis lyrata subsp. lyrata]	ath:AT3G56710	SIB1
CL10268.Contig1_NAU-YH	422	311	36	37	227.794	24.8869	23.5693	-3.19427	-3.27275	-0.0784775	Down	Down	Down	1.56e-57	4.79e-62	0.902535	K15104|1|3e-11|65.5|aly:ARALYDRAFT_481111|solute carrier family 25 (mitochondrial oxoglutarate transporter), member 11	-	-	-	PREDICTED: mitochondrial uncoupling protein 4-like [Cucumis sativus]	ath:AT2G22500	UCP5
CL13777.Contig2_NAU-YH	513	193	22	513	116.288	12.5108	8.38416	-3.21645	-3.79389	-0.577437	Down	Down	Down	5.83e-36	8.8e-44	0.446789	K09843|1|8e-60|227|ath:AT5G45340|(+)-abscisic acid 8'-hydroxylase [EC:1.14.13.93]	-	GO:0046906//tetrapyrrole binding;GO:0046914//transition metal ion binding;GO:0016709//oxidoreductase activity, acting on paired donors, with incorporation or reduction of molecular oxygen, NAD(P)H as one donor, and incorporation of one atom of oxygen	GO:0010162//seed dormancy process;GO:0006952//defense response;GO:0009687//abscisic acid metabolic process;GO:0009725//response to hormone stimulus;GO:0010243//response to organic nitrogen;GO:0046903//secretion;GO:0009416//response to light stimulus;GO:0006091//generation of precursor metabolites and energy;GO:0009415//response to water stimulus	abscisic acid 8'-hydroxylase 3 [Arabidopsis thaliana]	ath:AT5G45340	CYP707A3
gi|166131175|gb|FD562552.1|FD562552	792	359	40	14	140.108	14.7338	4.75182	-3.24934	-4.88192	-1.63258	Down	Down	Down	1.73e-67	1.07e-96	0.000938076	-	-	-	GO:0045491//xylan metabolic process	hypothetical protein [Arabidopsis thaliana]	ath:AT4G27435
CL3649.Contig1_NAU-YH	223	99	11	513	137.222	14.3902	0.01	-3.25335	-13.7442	-10.4909	Down	Down	Down	9.86e-19	5.91e-32	0.00226997	-	GO:0005911//cell-cell junction;GO:0043234//protein complex;GO:0043231//intracellular membrane-bounded organelle	GO:0019899//enzyme binding	GO:0006950//response to stress;GO:0009791//post-embryonic development;GO:0022610	jacalin lectin family protein [Arabidopsis lyrata subsp. lyrata]	ath:AT2G39330	JAL23
CL4912.Contig2_NAU-YH	1171	641	70	4	169.198	17.439	0.918249	-3.27833	-7.52561	-4.24729	Down	Down	Down	1.43e-121	1.81e-202	1.63e-16	K13248|1|5e-118|422|aly:ARALYDRAFT_889181|pyridoxal phosphate phosphatase PHOSPHO2 [EC:3.1.3.74]	-	-	-	hypothetical protein ARALYDRAFT_476431 [Arabidopsis lyrata subsp. lyrata]	ath:AT1G73010	PS2
Unigene25241_NAU-YH	1469	512	55	46	107.732	10.9225	8.4177	-3.30207	-3.67787	-0.375804	Down	Down	Down	9.78e-98	2.62e-113	0.416272	K01657|1|0.0|814|aly:ARALYDRAFT_487374|anthranilate synthase component I [EC:4.1.3.27]	GO:0009532//plastid stroma;GO:0043234//protein complex	GO:0016833//oxo-acid-lyase activity	GO:0006568//tryptophan metabolic process;GO:0009696//salicylic acid metabolic process;GO:0007243//intracellular protein kinase cascade;GO:0010243//response to organic nitrogen;GO:0009755//hormone-mediated signaling pathway;GO:0042743//hydrogen peroxide metabolic process;GO:0006605//protein targeting;GO:0009791//post-embryonic development;GO:0006091//generation of precursor metabolites and energy;…	hypothetical protein ARALYDRAFT_487374 [Arabidopsis lyrata subsp. lyrata]	ath:AT5G05730	ASA1
gi|161570771|gb|EY942066.1|EY942066	570	237	25	25	128.519	12.7952	11.7902	-3.32832	-3.44632	-0.118006	Down	Down	Down	1.47e-45	1.42e-49	0.86029	-	-	-	-	PREDICTED: uncharacterized protein LOC100853563 [Vitis vinifera]	None
gi|166146392|gb|FD580446.1|FD580446	527	1024	106	86	600.598	58.6781	43.8677	-3.35551	-3.77517	-0.419662	Down	Down	Down	1.51e-198	9.71e-232	0.149132	-	-	-	-	AT5G05960 [Arabidopsis thaliana]	ath:AT5G05960
gi|166128526|gb|FD564111.1|FD564111	531	1396	142	45	812.617	78.0143	22.7811	-3.38076	-5.15666	-1.7759	Down	Down	Down	1.21e-272	0	2.05e-13	-	-	-	GO:0009628//response to abiotic stimulus;GO:0009814//defense response, incompatible interaction	hypothetical protein [Arabidopsis thaliana]	ath:AT1G25275
gi|167428815|gb|FD937772.1|FD937772	767	265	26	10	106.794	9.88914	3.50479	-3.43284	-4.92935	-1.49652	Down	Down	Down	2.24e-52	1.07e-71	0.0194152	-	-	-	-	-	None
Unigene7440_NAU-YH	259	144	14	513	171.853	15.7692	0.01	-3.446	-14.0689	-10.6229	Down	Down	Down	1.35e-28	9.86e-47	0.000318875	-	GO:0005911//cell-cell junction;GO:0043234//protein complex;GO:0043231//intracellular membrane-bounded organelle	GO:0019899//enzyme binding	GO:0006950//response to stress;GO:0009791//post-embryonic development;GO:0022610	myrosinase-binding protein-like protein [Arabidopsis thaliana]	ath:AT2G39330	JAL23
gi|154164780|gb|EV536054.1|EV536054	708	258	25	0	112.637	10.3012	0.01	-3.4508	-13.4594	-10.0086	Down	Down	Down	3.18e-51	2.28e-84	1.78e-07	K10999|1|2e-95|346|aly:ARALYDRAFT_494593|cellulose synthase A [EC:2.4.1.12]	-	-	-	cellulose synthase 4.2 catalytic subunit [Brassica napus]	ath:AT5G44030	CESA4
Unigene23273_NAU-YH	1077	426	41	44	122.261	11.1058	10.9823	-3.46059	-3.47671	-0.0161262	Down	Down	Down	8.01e-85	8.19e-90	0.961623	K00224|1|3e-87|320|aly:ARALYDRAFT_476671|[EC:1.3.1.-];K13081|3|2e-50|197|vvi:100233112|leucoanthocyanidin reductase [EC:1.17.1.3]	GO:0016020//membrane;GO:0044424//intracellular part	GO:0036094//small molecule binding;GO:0016491//oxidoreductase activity	GO:0044710;GO:0006950//response to stress;GO:0010038//response to metal ion	F18O14.30 [Arabidopsis thaliana]	ath:AT1G19540
gi|332769799|gb|FY429891.1|FY429891	726	773	74	62	329.107	29.7355	22.9568	-3.4683	-3.84156	-0.373263	Down	Down	Down	2.45e-154	2.39e-177	0.327477	K15104|1|6e-75|278|ath:AT2G22500|solute carrier family 25 (mitochondrial oxoglutarate transporter), member 11	-	-	-	putative mitochondrial dicarboxylate carrier protein [Arabidopsis thaliana]	ath:AT2G22500	UCP5
Unigene1980_NAU-YH	1735	878	84	63	156.419	14.1241	9.76109	-3.46919	-4.00223	-0.533043	Down	Down	Down	2.2e-175	5.88e-208	0.0974487	K11820|1|0.0|748|aly:ARALYDRAFT_889955|N-hydroxythioamide S-beta-glucosyltransferase [EC:2.4.1.195];K13691|3|8e-103|372|rcu:RCOM_0100870|pathogen-inducible salicylic acid glucosyltransferase [EC:2.4.1.-]	-	GO:0035251//UDP-glucosyltransferase activity	GO:0006568//tryptophan metabolic process;GO:0019758;GO:0048588//developmental cell growth;GO:0009683;GO:0052482	thiohydroximate S-glucosyltransferase [Brassica napus]	ath:AT1G24100	UGT74B1
gi|332782536|gb|FY443555.1|FY443555	168	105	10	513	193.186	17.3649	12.8008	-3.47575	-3.91568	-0.439934	Down	Down	Down	4.8e-21	1.77e-24	0.720337	-	-	-	-	-	None
gi|161571259|gb|EY942722.1|EY942722	695	296	28	12	131.644	11.7531	4.64145	-3.48553	-4.82592	-1.3404	Down	Down	Down	2.74e-59	3.58e-79	0.0275607	K14490|1|2e-73|273|aly:ARALYDRAFT_898599|histidine-containing phosphotransfer peotein	GO:0043231//intracellular membrane-bounded organelle	GO:0004871//signal transducer activity;GO:0016628//oxidoreductase activity, acting on the CH-CH group of donors, NAD or NADP as acceptor;GO:0019901//protein kinase binding	GO:0009845//seed germination;GO:0010565//regulation of cellular ketone metabolic process;GO:0048229//gametophyte development;GO:0040007//growth;GO:0048367//shoot system development;GO:0006820//anion transport;GO:0009755//hormone-mediated signaling pathway;GO:0009966//regulation of signal transduction;GO:0030001//metal ion transport	histidine-containing phosphotransmitter 3 [Arabidopsis lyrata subsp. lyrata]	ath:AT3G21510	AHP1
gi|167437973|gb|FD942988.1|FD942988	823	747	70	46	280.553	24.813	15.025	-3.49911	-4.22284	-0.723727	Down	Down	Down	2.65e-150	6.08e-184	0.0370038	K00799|1|4e-103|372|aly:ARALYDRAFT_482003|glutathione S-transferase [EC:2.5.1.18]	-	-	-	glutathione S-transferase [Arabidopsis thaliana]	ath:AT2G30870	GSTF10
CL13205.Contig2_NAU-YH	252	202	18	6	247.768	20.8378	6.40041	-3.57171	-5.27468	-1.70297	Down	Down	Down	2.57e-41	1.61e-56	0.0389569	-	-	-	-	-	None
gi|332781398|gb|FY435893.1|FY435893	848	597	53	55	217.607	18.2331	17.4351	-3.57709	-3.64166	-0.0645666	Down	Down	Down	2.18e-122	4.67e-131	0.902425	-	-	GO:0004518//nuclease activity	-	hypothetical protein ARALYDRAFT_483187 [Arabidopsis lyrata subsp. lyrata]	ath:AT2G41180
Unigene9382_NAU-YH	1414	2229	190	27	487.254	39.1999	5.133	-3.63575	-6.56873	-2.93297	Down	Down	Down	0	0	1.1e-32	K11818|1|0.0|756|ath:AT4G31500|cytochrome P450, family 83, subfamily B, polypeptide 1 [EC:1.14.-.-];K12156|3|8e-145|511|ath:AT4G13770|cytochrome P450, family 83, subfamily A, polypeptide 1 [EC:1.14.-.-];K00517|5|5e-87|320|ath:AT3G26310|[EC:1.14.-.-]	GO:0016020//membrane;GO:0043231//intracellular membrane-bounded organelle	GO:0046914//transition metal ion binding;GO:0046906//tetrapyrrole binding;GO:0016709//oxidoreductase activity, acting on paired donors, with incorporation or reduction of molecular oxygen, NAD(P)H as one donor, and incorporation of one atom of oxygen	GO:0048364//root development;GO:0006568//tryptophan metabolic process;GO:0006732//coenzyme metabolic process;GO:0009639//response to red or far red light;GO:0006007//glucose catabolic process;GO:0006090//pyruvate metabolic process;GO:0042742//defense response to bacterium;GO:0006753//nucleoside phosphate metabolic process;GO:0006633//fatty acid biosynthetic process;GO:0005982//starch metabolic pr…	CYP83B1 [Brassica rapa subsp. chinensis]	ath:AT4G31500	CYP83B1
Unigene18964_NAU-YH	872	493	42	10	174.753	14.0512	3.08277	-3.63655	-5.82495	-2.1884	Down	Down	Down	1.85e-102	1.69e-144	1.71e-05	-	-	-	-	hypothetical protein ARALYDRAFT_903775 [Arabidopsis lyrata subsp. lyrata]	ath:AT2G43740
gi|158919446|gb|EX891629.1|EX891629	539	427	36	15	244.869	19.4847	7.481	-3.6516	-5.03264	-1.38104	Down	Down	Down	4.94e-89	5.7e-117	0.0076629	-	-	-	-	-	None
CL522.Contig3_NAU-YH	1183	918	77	18	239.857	18.9883	4.0902	-3.65899	-5.87386	-2.21487	Down	Down	Down	5.87e-192	1.99e-270	8.05e-10	K11821|1|0.0|645|ath:AT1G74100|desulfoglucosinolate sulfotransferase A/B/C [EC:2.8.2.-];K01014|3|2e-10|65.1|olu:OSTLU_32551|aryl sulfotransferase [EC:2.8.2.1]	-	GO:0047364//desulfoglucosinolate sulfotransferase activity	GO:0006568//tryptophan metabolic process;GO:0009755//hormone-mediated signaling pathway;GO:0009753//response to jasmonic acid stimulus;GO:0006972//hyperosmotic response;GO:0019758;GO:0009683;GO:0000097//sulfur amino acid biosynthetic process;GO:0006952//defense response	sulfotransferase [Brassica oleracea var. botrytis]	ath:AT1G74100	SOT16
gi|167435500|gb|FD941122.1|FD941122	726	402	33	19	171.153	13.2604	7.03516	-3.69009	-4.60456	-0.914472	Down	Down	Down	1.54e-84	1.15e-104	0.0967647	K14490|1|3e-61|233|rcu:RCOM_1489450|histidine-containing phosphotransfer peotein	GO:0043231//intracellular membrane-bounded organelle	GO:0004871//signal transducer activity;GO:0016628//oxidoreductase activity, acting on the CH-CH group of donors, NAD or NADP as acceptor;GO:0016740//transferase activity	GO:0009755//hormone-mediated signaling pathway;GO:0009966//regulation of signal transduction;GO:0044710	histidine-containing phosphotransfer protein 4 [Arabidopsis thaliana]	ath:AT3G16360	AHP4
gi|166129580|gb|FD565570.1|FD565570	310	135	11	513	134.607	10.3517	8.67153	-3.70081	-3.95632	-0.255509	Down	Down	Down	1.83e-28	1.14e-31	0.800052	K00588|1|1e-09|59.3|aly:ARALYDRAFT_912997|caffeoyl-CoA O-methyltransferase [EC:2.1.1.104]	-	-	-	putative caffeoyl-CoA O-methyltransferase protein [Isatis tinctoria]	ath:AT4G34050	CCoAOMT1
CL10156.Contig1_NAU-YH	567	319	25	15	173.901	12.8629	7.11157	-3.75698	-4.61196	-0.854971	Down	Down	Down	4.81e-68	4.32e-83	0.202322	K09286|1|4e-29|125|aly:ARALYDRAFT_493127|EREBP-like factor	GO:0043231//intracellular membrane-bounded organelle	GO:0003676//nucleic acid binding;GO:0001071//nucleic acid binding transcription factor activity	GO:0009642//response to light intensity;GO:0006979//response to oxidative stress;GO:0000160//two-component signal transduction system (phosphorelay);GO:0010243//response to organic nitrogen;GO:0002252;GO:0006351//transcription, DNA-dependent	ethylene responsive element binding factor, putative [Brassica oleracea]	ath:AT4G17490	ERF6
CL60.Contig1_NAU-YH	1164	507	38	25	134.632	9.52382	5.77357	-3.82134	-4.54342	-0.722077	Down	Down	Down	1.06e-109	5.62e-131	0.165614	K05933|1|5e-160|561|aly:ARALYDRAFT_475105|aminocyclopropanecarboxylate oxidase [EC:1.14.17.4]	GO:0005911//cell-cell junction;GO:0009536//plastid;GO:0016020//membrane;GO:0030312//external encapsulating structure	GO:0046914//transition metal ion binding;GO:0051536//iron-sulfur cluster binding;GO:0016705//oxidoreductase activity, acting on paired donors, with incorporation or reduction of molecular oxygen;GO:0016641//oxidoreductase activity, acting on the CH-NH2 group of donors, oxygen as acceptor;GO:0016836//hydro-lyase activity	GO:0051603//proteolysis involved in cellular protein catabolic process;GO:0034614//cellular response to reactive oxygen species;GO:0009720//detection of hormone stimulus;GO:0072350//tricarboxylic acid metabolic process;GO:0051707//response to other organism;GO:0006007//glucose catabolic process;GO:0015698//inorganic anion transport;GO:0070542//response to fatty acid;GO:0010039//response to iron i…	ACC oxidase [Brassica oleracea]	ath:AT1G62380	ACO2
[truncated: 82 more rows]
