# Supplementary material for: Transcriptome Profiling of Taproot Reveals Complex Regulatory Networks during Taproot Thickening in Radish (Raphanus sativus L.)
Source: Front Plant Sci. 2016 Aug 22;7:1210. doi: 10.3389/fpls.2016.01210 (PMC4992731; doi:10.3389/fpls.2016.01210)
Supplement: Table S7 — The differentially expressed transcripts encoding transcription factors during radish taproot thickening. [file Table7.XLSX]

## Sheet: Table S7 
Table S7 The differentially expressed transcripts encoding transcription factors during radish taproot thickening.
Transcript ID	Length	RPKM			Fold change			Up-Down-Regulation			Blast nr
		L1	L2	L3	log2(L2/L1)	log2(L3/L1)	log2(L3/L2)	L2/L1	L3/L1	L3/L2
1. AP2 family
gi|158917692|gb|EX891371.1|EX891371	789	0.783516	8.13441	0.340706	3.376	-1.20143	-4.57744	Up	Down	Down	AP2 domain containing protein, putative [Arabidopsis thaliana]
Unigene31831_NAU-YH	868	66.9473	0.01	4.64546	-12.7088	-3.84913	8.85968	Down	Down	Up	AP2 domain-containing protein [Arabidopsis lyrata subsp. lyrata]
Unigene17357_NAU-YH	808	81.4823	3.61051	16.9674	-4.49621	-2.26372	2.23249	Down	Down	Up	AP2-like ethylene-responsive transcription factor TOE2 [Arabidopsis thaliana]
gi|167447481|gb|FD952535.1|FD952535	463	24.7011	3.78051	12.1926	-2.70792	-1.01857	1.68935	Down	Down	Up	AP2 domain containing protein RAP2.12 [Arabidopsis thaliana]
gi|158643515|gb|EX753406.1|EX753406	832	13.7459	1.75318	4.84647	-2.97095	-1.504	1.46696	Down	Down	Up	AP2 transcription factor [Sisymbrium irio]
gi|158667351|gb|EX777242.1|EX777242	773	17.994	5.28359	4.86862	-1.76793	-1.88593	-0.118006	Down	Down	Down	AP2 transcription factor [Sisymbrium irio]
CL1533.Contig1_NAU-YH	1151	59.8859	35.2306	20.786	-0.765387	-1.5266	-0.761213	Down	Down	Down	AP2 domain containing protein RAP2.10 [Arabidopsis thaliana]
Unigene26173_NAU-YH	1030	54.9172	12.7455	6.00272	-2.10728	-3.19357	-1.0863	Down	Down	Down	AP2-like ethylene-responsive transcription factor [Arabidopsis thaliana]
CL531.Contig7_NAU-YH	228	29.8252	5.11806	2.35805	-2.54286	-3.66087	-1.11801	Down	Down	Down	AP2 domain containing protein RAP2.7 [Arabidopsis thaliana]
CL1504.Contig1_NAU-YH	1109	166.394	84.9672	29.5723	-0.969625	-2.49228	-1.52266	Down	Down	Down	AP2 domain-containing transcription factor family protein [Arabidopsis lyrata subsp.
gi|167496170|gb|FD981855.1|FD981855	558	23.2654	3.13688	0.963503	-2.89078	-4.59375	-1.70297	Down	Down	Down	AP2 domain containing protein RAP2.5 [Arabidopsis thaliana]
Unigene24928_NAU-YH	511	22.9857	18.8397	4.20849	-0.286962	-2.44936	-2.1624	Down	Down	Down	AP2/ERF and B3 domain-containing transcription factor ARF14 [Arabidopsis thaliana]
Unigene24925_NAU-YH	805	27.6459	7.61034	1.66967	-1.86104	-4.04943	-2.18839	Down	Down	Down	AP2/ERF and B3 domain-containing transcription factor RAV1 [Arabidopsis thaliana]
gi|167492830|gb|FD977536.1|FD977536	692	9.82678	2.95102	0.388464	-1.73551	-4.66087	-2.92536	Down	Down	Down	AP2 domain containing protein RAP2.5 [Arabidopsis thaliana]
2. ARF family
CL5881.Contig2_NAU-YH	1978	2.03148	11.9465	11.9595	2.55598	2.55756	0.001576	Up	Up	Up	auxin response factor 5 [Arabidopsis thaliana]	ARF
CL1404.Contig1_NAU-YH	2465	5.76814	33.7294	61.2882	2.54783	3.40943	0.861602	Up	Up	Up	auxin response factor 6 [Arabidopsis thaliana]	ARF
CL5881.Contig3_NAU-YH	976	2.85028	15.8419	19.2799	2.47457	2.75792	0.283357	Up	Up	Up	auxin response factor 5 [Arabidopsis thaliana]	ARF
CL13099.Contig3_NAU-YH	2314	13.0905	34.4175	52.3926	1.39462	2.00084	0.606221	Up	Up	Up	auxin response factor 7 [Arabidopsis thaliana]	ARF
gi|154178427|gb|EV547767.1|EV547767	710	40.9227	93.2713	106.012	1.18853	1.37326	0.184729	Up	Up	Up	auxin response factor 7-1 [Brassica rapa subsp. pekinensis]	ARF
gi|154257083|gb|EV568130.1|EV568130	798	6.97211	13.8919	20.8856	0.994574	1.58284	0.588263	Up	Up	Up	auxin responsive transcription factor [Arabidopsis thaliana]	ARF
CL11432.Contig2_NAU-YH	438	9.87981	17.3173	36.8243	0.809657	1.8981	1.08845	Up	Up	Up	auxin response factor 8-1 [Brassica rapa subsp. pekinensis]	ARF
CL8770.Contig3_NAU-YH	741	6.67416	10.6298	19.5899	0.671459	1.55345	0.881994	Up	Up	Up	auxin responsive transcription factor [Arabidopsis thaliana]	ARF
CL1404.Contig2_NAU-YH	1691	3.83858	36.574	13.9893	3.25217	1.86568	-1.3865	Up	Up	Down	auxin response factor 6 [Arabidopsis thaliana]	ARF
CL3674.Contig1_NAU-YH	1408	17.1233	48.8979	47.9213	1.51381	1.48471	-0.029105	Up	Up	Down	auxin response factor 6 [Brassica rapa subsp. pekinensis]	ARF
Unigene29830_NAU-YH	652	10.9037	30.8732	14.0181	1.50153	0.362467	-1.13907	Up	Up	Down	auxin response factor 5-1 [Brassica rapa subsp. pekinensis]	ARF
CL3674.Contig2_NAU-YH	1413	21.0002	61.9383	20.5465	1.56043	-0.031509	-1.59194	Up	Down	Down	auxin response factor 6 [Brassica rapa subsp. pekinensis]	ARF
Unigene16504_NAU-YH	957	0.01	0.01	31.7412	0	11.6321	11.6321	unchanged	Up	Up	PREDICTED: auxin response factor 11-like [Brachypodium distachyon]	ARF
Unigene14883_NAU-YH	771	0.01	0.01	21.9656	0	11.101	11.101	unchanged	Up	Up	PREDICTED: LOW QUALITY PROTEIN: auxin response factor 17-like [Vitis vinifera]	ARF
gi|332791208|gb|FY449641.1|FY449641	827	26.9105	13.7575	29.2546	-0.967951	0.120494	1.08845	Down	Up	Up	auxin response factor 8-1 [Brassica rapa subsp. pekinensis]	ARF
gi|332769020|gb|FY432256.1|FY432256	858	3.24228	0.680022	7.20606	-2.25335	1.1522	3.40556	Down	Up	Up	auxin response factor 18-1 [Brassica rapa subsp. pekinensis]	ARF
gi|332771514|gb|FY430781.1|FY430781	817	72.6397	27.4947	31.2578	-1.4016	-1.21654	0.185063	Down	Down	Up	auxin response factor 1 [Brassica rapa subsp. pekinensis]	ARF
CL8015.Contig2_NAU-YH	478	45.9119	16.4784	24.1823	-1.47829	-0.924916	0.553371	Down	Down	Up	auxin response factor 2-3 [Brassica rapa subsp. pekinensis]	ARF
CL8015.Contig1_NAU-YH	442	52.4486	13.8605	15.8128	-1.91993	-1.72981	0.190116	Down	Down	Up	auxin response factor 2-3 [Brassica rapa subsp. pekinensis]	ARF
CL481.Contig1_NAU-YH	1458	23.7441	2.80124	15.8562	-3.08343	-0.582524	2.5009	Down	Down	Up	auxin response factor 18-2 [Brassica rapa subsp. pekinensis]	ARF
gi|332783910|gb|FY434046.1|FY434046	736	27.7179	3.17097	3.28717	-3.12782	-3.0759	0.051919	Down	Down	Up	auxin response factor 8-1 [Brassica rapa subsp. pekinensis]	ARF
Unigene16761_NAU-YH	1370	23.9155	19.8035	10.2033	-0.27219	-1.22891	-0.956725	Down	Down	Down	auxin response factor 9 [Brassica rapa subsp. pekinensis]	ARF
Unigene17144_NAU-YH	425	64.0013	39.1261	24.6679	-0.70997	-1.37546	-0.665494	Down	Down	Down	auxin response factor 4 [Brassica rapa subsp. pekinensis]	ARF
gi|154172976|gb|EV544249.1|EV544249	857	28.1325	15.9992	10.3512	-0.814241	-1.44244	-0.628201	Down	Down	Down	auxin response factor 2-2 [Brassica rapa subsp. pekinensis]	ARF
gi|332779568|gb|FY438538.1|FY438538	841	39.6938	20.1193	9.90884	-0.980335	-2.00212	-1.02179	Down	Down	Down	auxin response factor 2-2 [Brassica rapa subsp. pekinensis]	ARF
3. ARR Family
B-ARR
gi|167477527|gb|FD962977.1|FD962977	700	0.441567	5.00108	12.2888	3.50153	4.79857	1.29703	Up	Up	Up	myb family transcription factor [Arabidopsis lyrata subsp. lyrata]	B-ARR
CL6560.Contig2_NAU-YH	1123	0.825727	7.27376	7.4206	3.13896	3.1678	0.028836	Up	Up	Up	DNA binding protein [Arabidopsis lyrata subsp. lyrata]	B-ARR
CL9388.Contig1_NAU-YH	4430	1.46525	4.34631	6.25015	1.56865	2.09275	0.524101	Up	Up	Up	ATSEB1 [Arabidopsis lyrata subsp. lyrata]	B-ARR
CL3281.Contig1_NAU-YH	1145	1.88968	4.58614	20.4254	1.27914	3.43416	2.15501	Up	Up	Up	homeodomain-like superfamily protein [Arabidopsis thaliana]	B-ARR
CL7519.Contig1_NAU-YH	1276	3.87582	30.6362	16.8537	2.98266	2.12049	-0.862167	Up	Up	Down	hypothetical protein ARALYDRAFT_356449 [Arabidopsis lyrata subsp. lyrata]	B-ARR
CL13899.Contig2_NAU-YH	909	1.36016	9.62804	8.87186	2.82346	2.70546	-0.118006	Up	Up	Down	hypothetical protein ARALYDRAFT_900392 [Arabidopsis lyrata subsp. lyrata]	B-ARR
CL2632.Contig5_NAU-YH	4269	4.19949	18.9976	6.61181	2.17753	0.654831	-1.5227	Up	Up	Down	hypothetical protein ARALYDRAFT_478841 [Arabidopsis lyrata subsp. lyrata]	B-ARR
CL426.Contig1_NAU-YH	1080	11.1618	33.765	22.1525	1.59695	0.988897	-0.608057	Up	Up	Down	protein GOLDEN2-like 2 [Arabidopsis thaliana]	B-ARR
CL3704.Contig4_NAU-YH	1487	6.85958	18.0492	12.1121	1.39574	0.820261	-0.575479	Up	Up	Down	hypothetical protein ARALYDRAFT_915160 [Arabidopsis lyrata subsp. lyrata]	B-ARR
gi|154263707|gb|EV574678.1|EV574678	830	35.0062	61.5092	23.9668	0.813194	-0.546569	-1.35976	Up	Down	Down	pseudo-response regulator 2 [Arabidopsis lyrata subsp. lyrata]	B-ARR
gi|156176329|gb|EW736475.1|EW736475	843	3.66663	5.53698	0.01	0.594644	-8.51831	-9.11295	Up	Down	Down	myb family transcription factor [Arabidopsis thaliana]	B-ARR
CL4241.Contig1_NAU-YH	1147	14.2826	16.5322	3.74985	0.211019	-1.92935	-2.14037	Up	Down	Down	hypothetical protein ARALYDRAFT_478672 [Arabidopsis lyrata subsp. lyrata]	B-ARR
CL12491.Contig1_NAU-YH	1456	68.1457	22.8415	38.4025	-1.57697	-0.827424	0.749544	Down	Down	Up	protein phytoclock 1 [Arabidopsis thaliana]	B-ARR
CL1318.Contig1_NAU-YH	1219	24.0888	5.50433	5.51307	-2.12972	-2.12743	0.002288	Down	Down	Up	hypothetical protein ARALYDRAFT_894522 [Arabidopsis lyrata subsp. lyrata]	B-ARR
CL8627.Contig2_NAU-YH	1182	15.6902	2.96172	3.63881	-2.40536	-2.10832	0.297032	Down	Down	Up	myb family transcription factor [Arabidopsis thaliana]	B-ARR
CL1318.Contig2_NAU-YH	1238	50.1846	5.89115	13.2454	-3.09062	-1.92175	1.16888	Down	Down	Up	hypothetical protein ARALYDRAFT_894522 [Arabidopsis lyrata subsp. lyrata]	B-ARR
CL9695.Contig2_NAU-YH	1685	25.6817	25.4506	8.77445	-0.013039	-1.54936	-1.53632	Down	Down	Down	hypothetical protein ARALYDRAFT_475994 [Arabidopsis lyrata subsp. lyrata]	B-ARR
CL1609.Contig2_NAU-YH	1065	20.6065	9.86128	5.55303	-1.06325	-1.89175	-0.828499	Down	Down	Down	hypothetical protein ARALYDRAFT_491902 [Arabidopsis lyrata subsp. lyrata]	B-ARR
gi|166148152|gb|FD579566.1|FD579566	793	12.8628	5.51821	0.01	-1.22093	-10.329	-9.10806	Down	Down	Down	myb family transcription factor [Arabidopsis thaliana]	B-ARR
CL11453.Contig2_NAU-YH	839	21.3679	7.99735	6.72844	-1.41785	-1.6671	-0.24925	Down	Down	Down	myb family transcription factor [Arabidopsis thaliana]	B-ARR
gi|166151814|gb|FD582924.1|FD582924	771	12.428	3.78378	0.697321	-1.7157	-4.15563	-2.43993	Down	Down	Down	protein kanadi2 / DNA binding / transcription factor [Arabidopsis thaliana]	B-ARR
gi|332785192|gb|FY442133.1|FY442133	591	17.7822	1.97448	0.454852	-3.17089	-5.2889	-2.11801	Down	Down	Down	hypothetical protein ARALYDRAFT_894522 [Arabidopsis lyrata subsp. lyrata]	B-ARR
gi|161529384|gb|EY901394.1|EY901394	669	10.1646	0.872136	0.40182	-3.54286	-4.66087	-1.11801	Down	Down	Down	myb family transcription factor [Arabidopsis thaliana]	B-ARR
CL8433.Contig1_NAU-YH	1307	26.9603	0.223205	0.01	-6.91632	-11.3966	-4.4803	Down	Down	Down	myb family transcription factor [Arabidopsis lyrata subsp. lyrata]	B-ARR
A-ARR
CL3597.Contig3_NAU-YH	866	8.92312	23.5809	23.5914	1.402	1.40264	0.000639	Up	Up	Up	two-component response regulator ARR4 [Arabidopsis thaliana]	A-ARR
CL381.Contig5_NAU-YH	385	2.40855	5.30417	18.1539	1.13896	2.91404	1.77508	Up	Up	Up	predicted protein [Arabidopsis lyrata subsp. lyrata]	A-ARR
CL3704.Contig5_NAU-YH	1623	4.18986	12.4026	20.8694	1.56567	2.31641	0.75075	Up	Up	Up	MUH15_1 [Arabidopsis thaliana]	A-ARR
CL3597.Contig4_NAU-YH	1303	2.3722	12.314	9.90271	2.376	2.0616	-0.314403	Up	Up	Down	two-component response regulator ARR4 [Arabidopsis thaliana]	A-ARR
gi|158942954|gb|EX905415.1|EX905415	795	2.72161	13.2104	4.05762	2.27914	0.576174	-1.70297	Up	Up	Down	two-component response regulator ARR4 [Arabidopsis thaliana]	A-ARR
CL381.Contig2_NAU-YH	1782	0.520365	6.71207	6.63746	3.68916	3.67304	-0.016126	Up	Up	Down	two-component response regulator ARR10 [Arabidopsis thaliana]	A-ARR
gi|332780483|gb|FY443066.1|FY443066	910	14.6057	43.2786	23.6323	1.56712	0.694229	-0.872893	Up	Up	Down	hypothetical protein ARALYDRAFT_486148 [Arabidopsis lyrata subsp. lyrata]	A-ARR
Unigene20642_NAU-YH	909	1.02012	26.3166	17.1523	4.68916	4.07158	-0.617577	Up	Up	Down	hypothetical protein ARALYDRAFT_889335 [Arabidopsis lyrata subsp. lyrata] two-component response regulator ARR7	A-ARR
CL11480.Contig2_NAU-YH	1045	4.14101	17.5875	11.5759	2.0865	1.48306	-0.603433	Up	Up	Down	hypothetical protein ARALYDRAFT_906046 [Arabidopsis lyrata subsp. lyrata]	A-ARR
gi|156167861|gb|EW728007.1|EW728007	849	13.1066	21.6478	6.33256	0.723927	-1.04943	-1.77336	Up	Down	Down	hypothetical protein ARALYDRAFT_889335 [Arabidopsis lyrata subsp. lyrata]	A-ARR
CL3597.Contig2_NAU-YH	1022	19.0539	49.6682	9.99516	1.38224	-0.930786	-2.31302	Up	Down	Down	hypothetical protein ARALYDRAFT_888316 [Arabidopsis lyrata subsp. lyrata]	A-ARR
CL11480.Contig1_NAU-YH	1098	8.72678	2.39123	27.6652	-1.8677	1.66455	3.53225	Down	Up	Up	hypothetical protein ARALYDRAFT_906046 [Arabidopsis lyrata subsp. lyrata]	A-ARR
4. AUX/IAA Family
Unigene27665_NAU-YH	651	0.474803	12.9956	4.95516	4.77455	3.38353	-1.39102	Up	Up	Down	phytochrome-associated protein 1 [Arabidopsis thaliana]
Unigene31772_NAU-YH	667	0.463414	8.31014	4.43327	4.1645	3.258	-0.906502	Up	Up	Down	auxin-responsive protein IAA27 [Arabidopsis thaliana]
Unigene27663_NAU-YH	452	12.993	60.6694	35.6837	2.22323	1.45753	-0.765704	Up	Up	Down	phytochrome-associated protein 1 [Arabidopsis thaliana]
CL10262.Contig1_NAU-YH	786	5.50555	13.3617	1.02602	1.27914	-2.42383	-3.70297	Up	Down	Down	indole-3-acetic acid-amido synthetase GH3.17 [Arabidopsis thaliana]
CL1259.Contig6_NAU-YH	905	31.422	35.1365	12.1785	0.161194	-1.36744	-1.52864	Up	Down	Down	phytochrome-associated protein 1 [Arabidopsis thaliana]
gi|166101885|gb|FD534691.1|FD534691	686	8.561	9.35576	1.17559	0.128076	-2.8644	-2.99248	Up	Down	Down	auxin-responsive protein IAA3 [Arabidopsis thaliana]
gi|154180104|gb|EV549444.1|EV549444	570	35.7902	9.21251	13.2051	-1.9579	-1.43847	0.519424	Down	Down	Up	hypothetical protein ARALYDRAFT_470401 [Arabidopsis lyrata subsp. lyrata]
CL8883.Contig1_NAU-YH	1264	204.924	44.3134	51.8919	-2.20927	-1.9815	0.227769	Down	Down	Up	phytochrome-associated protein 2 [Arabidopsis thaliana]
gi|167436622|gb|FD943095.1|FD943095	824	20.6315	3.18637	3.58858	-2.69486	-2.52336	0.171501	Down	Down	Up	auxin-responsive protein IAA11 [Arabidopsis thaliana]
gi|156166444|gb|EW726590.1|EW726590	718	11.1929	1.62523	1.87199	-2.78387	-2.57995	0.203922	Down	Down	Up	indoleacetic acid-induced protein 2 [Arabidopsis lyrata subsp. lyrata]
CL12734.Contig3_NAU-YH	1045	73.9467	6.42084	41.1586	-3.52565	-0.84529	2.68036	Down	Down	Up	auxin-responsive protein IAA7 [Arabidopsis thaliana]
gi|166141260|gb|FD574781.1|FD574781	767	11.6869	0.760703	1.75239	-3.94141	-2.73749	1.20392	Down	Down	Up	auxin-responsive protein IAA11 [Arabidopsis thaliana]
gi|156176535|gb|EW736681.1|EW736681	935	102.151	6.55222	12.9377	-3.96257	-2.98104	0.98153	Down	Down	Up	auxin-responsive protein IAA17 [Arabidopsis thaliana]
CL5706.Contig1_NAU-YH	1182	4.44556	0.24681	0.454852	-4.17089	-3.2889	0.881994	Down	Down	Up	auxin-responsive protein IAA8 [Arabidopsis thaliana]
gi|166096676|gb|FD528649.1|FD528649	762	9.73534	0.382847	3.52779	-4.66839	-1.46447	3.20392	Down	Down	Up	indoleacetic acid (IAA)-inducible gene (IAA7) [Arabidopsis thaliana]
CL12734.Contig2_NAU-YH	1069	237.1	8.73278	33.9479	-4.76291	-2.8041	1.95881	Down	Down	Up	auxin-responsive protein IAA7 [Arabidopsis thaliana]
gi|166142854|gb|FD575670.1|FD575670	537	17.268	0.543258	1.50177	-4.99032	-3.52336	1.46696	Down	Down	Up	indoleacetic acid (IAA)-inducible gene (IAA7) [Arabidopsis thaliana]
gi|156169085|gb|EW729231.1|EW729231	787	103.294	2.5948	3.75729	-5.31499	-4.78092	0.534071	Down	Down	Up	indoleacetic acid-induced protein 2 [Arabidopsis lyrata subsp. lyrata]
CL1297.Contig1_NAU-YH	890	158.022	1.31114	4.83267	-6.91315	-5.03116	1.88199	Down	Down	Up	indoleacetic acid-induced protein 2 [Arabidopsis lyrata subsp. lyrata]
gi|154169598|gb|EV540872.1|EV540872	792	5.85411	0.01	1.01825	-9.19331	-2.52336	6.66994	Down	Down	Up	auxin-responsive protein IAA19 [Arabidopsis thaliana]
gi|158644869|gb|EX754760.1|EX754760	759	6.92312	0.01	0.354173	-9.43528	-4.2889	5.14638	Down	Down	Up	indoleacetic acid-induced protein 2 [Arabidopsis lyrata subsp. lyrata]
gi|167442969|gb|FD950192.1|FD950192	788	8.23736	0.01	3.41139	-9.68604	-1.27182	8.41422	Down	Down	Up	auxin-responsive protein IAA11 [Arabidopsis thaliana]
CL7139.Contig1_NAU-YH	264	23.4164	0.01	2.03649	-11.1933	-3.52336	7.66994	Down	Down	Up	indole-3-acetic acid-amido synthetase GH3.5 [Arabidopsis thaliana]
gi|161572270|gb|EY943822.1|EY943822	882	33.6432	0.01	0.609563	-11.7161	-5.7864	5.9297	Down	Down	Up	indole-3-acetic acid-amido synthetase GH3.5 [Arabidopsis thaliana]
Unigene32362_NAU-YH	305	16.2149	0.01	0.01	-10.6631	-10.6631	0	Down	Down	unchanged	indole-3-acetic acid-amido synthetase GH3.5 [Arabidopsis thaliana]
Unigene27891_NAU-YH	996	133.446	116.868	51.2804	-0.191376	-1.37977	-1.1884	Down	Down	Down	indole-3-acetic acid inducible 4 [Arabidopsis thaliana]
CL4256.Contig3_NAU-YH	1259	9.32938	6.95146	0.213517	-0.424465	-5.44936	-5.0249	Down	Down	Down	indoleacetic acid-induced protein 16 [Brassica rapa]
gi|166131819|gb|FD564021.1|FD564021	696	21.7611	12.5746	3.47609	-0.791247	-2.64622	-1.85497	Down	Down	Down	auxin-responsive protein [Brassica rapa]
CL4256.Contig1_NAU-YH	1197	28.4049	16.0853	4.71609	-0.820394	-2.59048	-1.77008	Down	Down	Down	indoleacetic acid-induced protein 16 [Brassica rapa]
CL449.Contig2_NAU-YH	1117	120.927	68.4272	60.4057	-0.821495	-1.00138	-0.179885	Down	Down	Down	auxin-responsive protein IAA13 [Arabidopsis thaliana]
gi|167474452|gb|FD958954.1|FD958954	609	55.3228	25.8676	0.01	-1.09672	-12.4337	-11.3369	Down	Down	Down	auxin-responsive protein IAA9 [Arabidopsis thaliana]
gi|161564279|gb|EY935659.1|EY935659	799	11.9925	5.11166	1.34577	-1.23027	-3.15563	-1.92536	Down	Down	Down	auxin-responsive protein IAA3 [Arabidopsis thaliana]
gi|166112189|gb|FD544193.1|FD544193	759	6.10864	1.53744	0.354173	-1.99032	-4.10832	-2.11801	Down	Down	Down	auxin-responsive protein IAA3 [Arabidopsis thaliana]
gi|158656684|gb|EX766575.1|EX766575	819	18.1156	4.27443	2.29758	-2.08343	-2.97904	-0.895613	Down	Down	Down	indoleacetic acid-induced protein 13 [Arabidopsis lyrata subsp. lyrata]
gi|166134256|gb|FD565917.1|FD565917	711	11.3031	2.46185	1.13425	-2.1989	-3.31691	-1.11801	Down	Down	Down	auxin-responsive protein IAA28 [Arabidopsis thaliana]
CL1297.Contig2_NAU-YH	892	84.5512	16.6796	14.4655	-2.34174	-2.54721	-0.205469	Down	Down	Down	indoleacetic acid-induced protein 2 [Arabidopsis lyrata subsp. lyrata]
Unigene33245_NAU-YH	579	14.4139	2.51925	1.39284	-2.51639	-3.37136	-0.854971	Down	Down	Down	indole-3-acetic acid inducible 34 [Arabidopsis thaliana]
gi|161574103|gb|EY945628.1|EY945628	698	14.1706	2.08975	1.15538	-2.7615	-3.61647	-0.854971	Down	Down	Down	indoleacetic acid-induced protein 30 [Arabidopsis lyrata subsp. lyrata]
gi|167447206|gb|FD952830.1|FD952830	780	22.1916	2.9921	0.689275	-2.89078	-5.00879	-2.11801	Down	Down	Down	auxin-responsive protein IAA19 [Arabidopsis thaliana]
gi|167450956|gb|FD956866.1|FD956866	426	15.9628	2.05443	0.01	-2.9579	-10.6405	-7.6826	Down	Down	Down	indoleacetic acid-induced protein 10 [Arabidopsis lyrata subsp. lyrata]
gi|167442644|gb|FD946681.1|FD946681	792	8.19575	0.736691	0.01	-3.47575	-9.67873	-6.20299	Down	Down	Down	auxin-responsive protein IAA28 [Arabidopsis thaliana]
gi|156176595|gb|EW736741.1|EW736741	838	21.3934	1.74063	0.01	-3.61948	-11.0629	-7.44347	Down	Down	Down	auxin-responsive protein IAA19 [Arabidopsis thaliana]
gi|158926819|gb|EX898926.1|EX898926	763	5.67151	0.382345	0.01	-3.89078	-9.14759	-5.2568	Down	Down	Down	auxin-responsive protein IAA32 [Arabidopsis thaliana]
CL7139.Contig2_NAU-YH	1094	103.692	3.73329	1.96576	-4.79571	-5.72107	-0.925361	Down	Down	Down	indole-3-acetic acid-amido synthetase GH3.6 [Arabidopsis thaliana]
5. B3 family
CL12259.Contig1_NAU-YH	529	0.01	0.551474	9.1469	5.78522	9.83714	4.05192	Up	Up	Up	B3 domain-containing protein REM5 [Arabidopsis thaliana]
Unigene19750_NAU-YH	444	2.08849	17.7403	4.23811	3.0865	1.02096	-2.06554	Up	Up	Down	B3 domain-containing protein [Arabidopsis thaliana]
CL4679.Contig1_NAU-YH	602	4.62105	23.2608	8.03773	2.33161	0.798566	-1.53304	Up	Up	Down	B3 domain-containing transcription repressor VAL1 [Arabidopsis thaliana]
gi|166151221|gb|FD582511.1|FD582511	812	7.23257	9.3411	0.993167	0.369084	-2.8644	-3.23348	Up	Down	Down	B3 domain-containing protein [Arabidopsis thaliana]
gi|154262880|gb|EV573851.1|EV573851	920	17.4707	8.56163	6.72043	-1.02898	-1.37831	-0.349331	Down	Down	Down	B3 domain-containing transcription factor VRN1 [Arabidopsis thaliana]
6. bHLH Family
Unigene11149_NAU-YH	238	1.29873	24.5151	39.532	4.2385	4.92785	0.689349	Up	Up	Up	transcription factor bHLH94 [Arabidopsis thaliana]
gi|161557777|gb|EY929981.1|EY929981	601	4.11444	36.4055	54.5686	3.14539	3.7293	0.583913	Up	Up	Up	transcription factor bHLH96 [Arabidopsis thaliana]
CL5192.Contig1_NAU-YH	946	25.1591	61.0597	48.8759	1.27914	0.958044	-0.321098	Up	Up	Down	transcription factor bHLH148 [Arabidopsis thaliana]
Unigene2216_NAU-YH	1479	45.142	151.881	59.4342	1.7504	0.396825	-1.35357	Up	Up	Down	transcription factor bHLH78 [Arabidopsis thaliana]
gi|166108094|gb|FD541885.1|FD541885	621	0.01	26.7771	12.1206	11.3868	10.2432	-1.14354	Up	Up	Down	transcription factor bHLH93 [Arabidopsis thaliana]
CL2059.Contig4_NAU-YH	1437	4.30198	46.49	8.79221	3.43385	1.03123	-2.40262	Up	Up	Down	transcription factor bHLH93 [Arabidopsis thaliana]
gi|161533559|gb|EY905582.1|EY905582	764	4.85493	47.3488	26.741	3.28581	2.46153	-0.824275	Up	Up	Down	transcription factor bHLH93 [Arabidopsis thaliana]
CL730.Contig2_NAU-YH	1655	6.35003	37.3696	12.3445	2.55703	0.959031	-1.598	Up	Up	Down	transcription factor bHLH96 [Arabidopsis thaliana]
gi|154163591|gb|EV534865.1|EV534865	677	3.65255	23.7003	14.2946	2.69793	1.96849	-0.729441	Up	Up	Down	transcription factor bHLH96 [Arabidopsis thaliana]
CL1585.Contig1_NAU-YH	655	1.88762	5.79005	0.01	1.61701	-7.56042	-9.17743	Up	Down	Down	bHLH family protein [Brassica oleracea]
gi|158656573|gb|EX766464.1|EX766464	843	0.733326	9.68971	0.637763	3.72393	-0.201434	-3.92536	Up	Down	Down	transcription factor bHLH61 [Arabidopsis thaliana]
gi|161548401|gb|EY920849.1|EY920849	790	5.08641	7.75484	0.01	0.60845	-8.9905	-9.59895	Up	Down	Down	transcription factor bHLH7 [Arabidopsis thaliana]
CL7893.Contig1_NAU-YH	524	80.2237	185.95	50.788	1.21281	-0.65954	-1.87235	Up	Down	Down	transcription factor bHLH78 [Arabidopsis thaliana]
gi|167506577|gb|FD987808.1|FD987808	780	1.18883	1.12204	13.4409	-0.083428	3.49901	3.58243	Down	Up	Up	transcription factor bHLH104 [Arabidopsis thaliana]
Unigene17575_NAU-YH	958	4.51708	1.21808	12.0659	-1.89078	1.41748	3.30826	Down	Up	Up	transcription factor bHLH51 [Arabidopsis thaliana]
CL5658.Contig1_NAU-YH	1228	30.2049	13.7788	25.3932	-1.13234	-0.250344	0.881994	Down	Down	Up	transcription factor (bHLH020) [Arabidopsis thaliana]
gi|156161496|gb|EW721642.1|EW721642	865	12.1495	0.01	0.932314	-10.2467	-3.70393	6.54274	Down	Down	Up	transcription factor (bHLH020) [Arabidopsis thaliana]
gi|158922052|gb|EX894475.1|EX894475	673	14.697	2.60086	3.99431	-2.49847	-1.87951	0.61896	Down	Down	Up	transcription factor bHLH112 [Arabidopsis thaliana]
gi|166142683|gb|FD573819.1|FD573819	761	19.9024	4.21685	15.8959	-2.23871	-0.324291	1.91442	Down	Down	Up	transcription factor bHLH122 [Arabidopsis thaliana]
CL9140.Contig1_NAU-YH	524	15.9268	2.22694	3.07806	-2.83832	-2.37136	0.466957	Down	Down	Up	transcription factor bHLH123 [Arabidopsis thaliana]
CL12969.Contig1_NAU-YH	1272	33.0481	9.17389	11.8347	-1.84896	-1.48154	0.367421	Down	Down	Up	transcription factor bHLH34 [Arabidopsis thaliana]
CL3459.Contig1_NAU-YH	1239	43.4083	9.65368	23.8659	-2.16882	-0.863018	1.3058	Down	Down	Up	transcription factor bHLH60 [Arabidopsis thaliana]
gi|154182946|gb|EV552286.1|EV552286	769	4.82336	0.01	0.01	-8.91389	-8.91389	0	Down	Down	unchanged	transcription factor bHLH60 [Arabidopsis thaliana]
gi|332785683|gb|FY444615.1|FY444615	780	76.878	0.01	0.01	-12.9084	-12.9084	0	Down	Down	unchanged	transcription factor bHLH92 [Arabidopsis thaliana]
gi|166098875|gb|FD529513.1|FD529513	873	8.85158	0.334169	0.307924	-4.72728	-4.84529	-0.118006	Down	Down	Down	transcription factor bHLH35
gi|161574581|gb|EY945461.1|EY945461	754	31.5656	4.256	2.85217	-2.89078	-3.46822	-0.577437	Down	Down	Down	transcription factor bHLH110 [Arabidopsis thaliana]
gi|166122014|gb|FD553935.1|FD553935	799	50.678	1.82559	0.336442	-4.79492	-7.23486	-2.43993	Down	Down	Down	transcription factor bHLH122 [Arabidopsis thaliana]
Unigene24051_NAU-YH	1187	37.7583	16.2209	7.47344	-1.21894	-2.33695	-1.11801	Down	Down	Down	transcription factor bHLH13 [Arabidopsis thaliana]
Unigene13386_NAU-YH	899	24.7553	17.1987	2.99018	-0.525433	-3.04943	-2.524	Down	Down	Down	transcription factor bHLH149 [Arabidopsis thaliana]
Unigene31141_NAU-YH	292	26.4638	12.988	5.52364	-1.02685	-2.26033	-1.23348	Down	Down	Down	transcription factor bHLH3 [Arabidopsis thaliana]
Unigene23215_NAU-YH	450	139.437	105.023	19.7133	-0.408914	-2.82238	-2.41346	Down	Down	Down	transcription factor bHLH62 [Arabidopsis thaliana]
Unigene28748_NAU-YH	1011	203.619	54.8255	5.05196	-1.89295	-5.33289	-3.43993	Down	Down	Down	transcription factor bHLH63 [Arabidopsis thaliana]
CL10556.Contig1_NAU-YH	927	50.0157	18.2528	4.92977	-1.45427	-3.34279	-1.88852	Down	Down	Down	transcription factor bHLH99 [Arabidopsis thaliana]
7. bZIP Family
gi|158920862|gb|EX893953.1|EX893953	765	0.01	5.72019	0.01	9.15992	0	-9.15992	Up	unchanged	Down	bZIP transcription factor family protein [Arabidopsis lyrata subsp. lyrata]
CL2202.Contig4_NAU-YH	893	14.1915	15.0275	4.51541	0.082582	-1.6521	-1.73468	Up	Down	Down	bZIP transcription factor [Brassica juncea]
CL8483.Contig1_NAU-YH	1086	0.28462	12.8941	0.24753	5.50153	-0.201434	-5.70297	Up	Down	Down	bZIP transcription factor family protein [Arabidopsis lyrata subsp. lyrata]
CL3320.Contig2_NAU-YH	1208	15.3525	6.27895	18.4701	-1.28988	0.266715	1.55659	Down	Up	Up	bZIP transcription factor family protein [Arabidopsis lyrata subsp. lyrata]
gi|166150523|gb|FD581321.1|FD581321	679	16.3881	0.859292	1.18771	-4.25335	-3.7864	0.466957	Down	Down	Up	bZIP family transcription factor [Arabidopsis lyrata subsp. lyrata]
CL5353.Contig1_NAU-YH	788	43.1481	10.366	15.0101	-2.05743	-1.52336	0.534071	Down	Down	Up	bZIP transcription factor family protein [Arabidopsis lyrata subsp. lyrata]
CL2202.Contig1_NAU-YH	797	17.84	7.32069	3.37286	-1.28506	-2.40307	-1.11801	Down	Down	Down	bZIP transcription factor [Brassica juncea]
gi|156159293|gb|EW719439.1|EW719439	739	7.11049	5.13191	0.01	-0.470451	-9.4738	-9.00335	Down	Down	Down	bZIP transcription factor family protein [Arabidopsis lyrata subsp. lyrata]
gi|167429945|gb|FD935767.1|FD935767	733	14.7591	0.397994	0.01	-5.21271	-10.5274	-5.31468	Down	Down	Down	bZIP transcription factor family protein [Arabidopsis lyrata subsp. lyrata]
gi|161549260|gb|EY919349.1|EY919349	790	11.7379	1.47711	0.68055	-2.99032	-4.10832	-1.11801	Down	Down	Down	bZIP transcription factor family protein [Arabidopsis lyrata subsp. lyrata]
8. BEE Family
gi|167439429|gb|FD948203.1|FD948203	767	12.8958	2.66246	1.40192	-2.27607	-3.20143	-0.925361	Down	Down	Down	transcription factor BEE 2 [Arabidopsis thaliana]
gi|161554437|gb|EY926186.1|EY926186	848	13.851	2.40815	1.58501	-2.524	-3.12743	-0.603433	Down	Down	Down	transcription factor BEE 2 [Arabidopsis thaliana]
gi|158940257|gb|EX902589.1|EX902589	815	6.06816	3.22155	0.01	-0.913503	-9.24512	-8.33161	Down	Down	Down	transcription factor BEE 3 [Arabidopsis thaliana]
9. Zinc finger Family (C2H2, C3HC4-type, CCCH, B-box)
CL149.Contig1_NAU-YH	2264	6.55329	10.9527	13.4171	0.741	1.03378	0.292782	Up	Up	Up	C2H2-type zinc finger family protein [Arabidopsis lyrata subsp. lyrata]
CL580.Contig6_NAU-YH	660	0.936658	13.2604	5.29489	3.82346	2.49901	-1.32446	Up	Up	Down	C2H2-like zinc finger protein [Arabidopsis thaliana]
gi|156177645|gb|EW737791.1|EW737791	871	3.19388	30.8141	5.24672	3.27021	0.716104	-2.5541	Up	Up	Down	C2H2-like zinc finger protein [Arabidopsis thaliana]
CL5081.Contig3_NAU-YH	1101	21.0557	3.17961	37.3561	-2.72728	0.827135	3.55442	Down	Up	Up	C2H2 zinc finger protein 1 [Eutrema halophilum]
Unigene11736_NAU-YH	396	6.24438	2.21007	26.4744	-1.49847	2.08397	3.58243	Down	Up	Up	C2H2-type zinc finger protein [Arabidopsis thaliana]
gi|166131854|gb|FD564041.1|FD564041	722	235.034	12.5258	151.536	-4.22989	-0.633211	3.59668	Down	Down	Up	C2H2 type zinc finger protein [Brassica rapa]
gi|158926473|gb|EX898656.1|EX898656	796	205.418	13.9268	51.6697	-3.88262	-1.99117	1.89145	Down	Down	Up	C2H2 zinc finger protein 1 [Brassica carinata]
gi|332793972|gb|FY453627.1|FY453627	886	32.0959	1.64633	5.7647	-4.28506	-2.47707	1.80799	Down	Down	Up	C2H2 zinc finger protein 1 [Eutrema halophilum]
Unigene20792_NAU-YH	304	19.3186	0.01	4.42134	-10.9158	-2.12743	8.78834	Down	Down	Up	C2H2 zinc finger protein 1 [Eutrema halophilum]
gi|154176566|gb|EV545907.1|EV545907	886	9.41944	4.60972	2.12384	-1.03096	-2.14897	-1.11801	Down	Down	Down	C2H2 type zinc finger protein [Brassica rapa]
CL8328.Contig1_NAU-YH	863	26.8624	18.5923	4.67237	-0.530887	-2.52336	-1.99247	Down	Down	Down	C2H2-like zinc finger protein [Arabidopsis thaliana]
CL13612.Contig2_NAU-YH	909	31.9638	22.4654	10.3505	-0.508734	-1.62674	-1.11801	Down	Down	Down	C2H2-like zinc finger protein [Arabidopsis thaliana]
gi|161572318|gb|EY944110.1|EY944110	898	11.0146	4.54812	2.39481	-1.27607	-2.20143	-0.925361	Down	Down	Down	C2H2-like zinc finger protein [Arabidopsis thaliana]
CL10102.Contig1_NAU-YH	898	8.60515	5.84759	0.598702	-0.557359	-3.84529	-3.28793	Down	Down	Down	C2H2-type zinc finger domain-containing protein [Arabidopsis thaliana]
CL9940.Contig2_NAU-YH	1159	4.26709	8.05466	13.2205	0.916572	1.63146	0.714884	Up	Up	Up	zinc finger (CCCH-type) family protein [Arabidopsis lyrata subsp. lyrata]
CL10274.Contig1_NAU-YH	1842	3.52391	6.65181	1.75125	0.916572	-1.00879	-1.92536	Up	Down	Down	zinc finger (CCCH-type) family protein [Arabidopsis lyrata subsp. lyrata]
gi|158928672|gb|EX901624.1|EX901624	806	43.3349	52.8443	19.6777	0.286217	-1.13897	-1.42519	Up	Down	Down	zinc finger (CCCH-type) family protein [Arabidopsis lyrata subsp. lyrata]
Unigene30043_NAU-YH	578	29.9471	20.1889	67.9019	-0.568855	1.18104	1.74989	Down	Up	Up	zinc finger (CCCH-type) family protein [Arabidopsis lyrata subsp. lyrata]
CL7514.Contig2_NAU-YH	1685	14.1249	7.61786	16.7512	-0.890783	0.246025	1.13681	Down	Up	Up	zinc finger (CCCH-type) family protein [Arabidopsis lyrata subsp. lyrata]
CL7514.Contig1_NAU-YH	1042	17.7983	3.07968	20.1226	-2.53089	0.177078	2.70797	Down	Up	Up	zinc finger (CCCH-type) family protein [Arabidopsis lyrata subsp. lyrata]
gi|156169078|gb|EW729224.1|EW729224	845	23.4109	18.6431	8.58943	-0.328541	-1.44655	-1.11801	Down	Down	Down	zinc finger (CCCH-type) family protein [Arabidopsis lyrata subsp. lyrata]
gi|167445586|gb|FD952994.1|FD952994	774	23.5617	12.0612	7.6408	-0.966071	-1.62464	-0.658574	Down	Down	Down	zinc finger (CCCH-type) family protein [Arabidopsis lyrata subsp. lyrata]
Unigene5191_NAU-YH	477	0.648002	15.2898	1.12712	4.56043	0.798566	-3.76186	Up	Up	Down	zinc finger (B-box type) family protein [Arabidopsis lyrata subsp. lyrata]
CL11580.Contig3_NAU-YH	1596	13.7506	4.20412	15.4957	-1.70961	0.172381	1.88199	Down	Up	Up	zinc finger (B-box type) family protein [Arabidopsis lyrata subsp. lyrata]
Unigene30727_NAU-YH	1294	44.1908	4.28351	49.4424	-3.36688	0.162002	3.52888	Down	Up	Up	zinc finger (B-box type) family protein [Arabidopsis lyrata subsp. lyrata]
CL11946.Contig1_NAU-YH	923	9.37672	8.21773	42.2302	-0.190343	2.17112	2.36146	Down	Up	Up	zinc finger (B-box type) family protein [Arabidopsis lyrata subsp. lyrata]
CL11580.Contig2_NAU-YH	1445	20.7491	8.47934	17.115	-1.29102	-0.277785	1.01324	Down	Down	Up	zinc finger (B-box type) family protein [Arabidopsis lyrata subsp. lyrata]
Unigene31074_NAU-YH	956	0.646647	4.57735	20.5268	2.82346	4.98839	2.16493	Up	Up	Up	C3HC4-type RING finger-containing protein [Arabidopsis thaliana]
Unigene5079_NAU-YH	471	1.31251	6.19383	19.4051	2.2385	3.88603	1.64753	Up	Up	Up	C3HC4-type RING finger-containing protein [Arabidopsis thaliana]
gi|332780555|gb|FY443138.1|FY443138	856	3.24985	7.83853	16.6441	1.27021	2.35656	1.08635	Up	Up	Up	C3HC4-type RING finger-containing protein [Arabidopsis thaliana]
Unigene29143_NAU-YH	276	2.23983	13.7409	20.4535	2.61701	3.19088	0.573872	Up	Up	Up	C3HC4-type RING finger domain-containing protein [Arabidopsis thaliana]
CL13988.Contig1_NAU-YH	1261	19.6096	25.2169	47.3255	0.362828	1.27105	0.908226	Up	Up	Up	C3HC4-type RING finger domain-containing protein [Arabidopsis thaliana]
Unigene29146_NAU-YH	775	1.59534	15.4334	32.6049	3.27412	4.35316	1.07903	Up	Up	Up	C3HC4-type RING finger domain-containing protein [Arabidopsis thaliana]
CL3171.Contig2_NAU-YH	1562	28.4955	42.2093	84.5002	0.566826	1.56822	1.00139	Up	Up	Up	C3HC4 type zinc finger protein [Brassica rapa]
Unigene9612_NAU-YH	995	125.192	50.4296	87.8046	-1.3118	-0.511774	0.800025	Down	Down	Up	C3HC4 type zinc finger protein [Brassica rapa]
gi|166138331|gb|FD572032.1|FD572032	632	11.2488	1.84639	5.95481	-2.60699	-0.917641	1.68935	Down	Down	Up	C3HC4 type zinc finger protein [Brassica rapa]
gi|156158833|gb|EW718979.1|EW718979	752	9.8648	0.01	0.01	-9.94615	-9.94615	0	Down	Down	unchanged	C3HC4 type zinc finger protein [Brassica rapa]
Unigene21520_NAU-YH	1648	48.7653	24.4288	21.3684	-0.997271	-1.19038	-0.193107	Down	Down	Down	C3HC4-type RING finger-containing protein [Arabidopsis thaliana]
Unigene17063_NAU-YH	2335	73.998	21.2394	18.8805	-1.80074	-1.97059	-0.169845	Down	Down	Down	C3HC4-type RING finger domain-containing protein [Arabidopsis thaliana]
gi|161556615|gb|EY928589.1|EY928589	596	25.4123	14.6844	1.35311	-0.791247	-4.23118	-3.43993	Down	Down	Down	C3HC4 type zinc finger protein [Brassica rapa]
gi|154165950|gb|EV537224.1|EV537224	838	6.63932	8.35502	17.9639	0.331609	1.436	1.10439	Up	Up	Up	C3H4 type zinc finger protein [Arabidopsis thaliana]
CL6212.Contig1_NAU-YH	925	13.0322	14.5076	26.4458	0.154732	1.02096	0.866227	Up	Up	Up	C3H4 type zinc finger protein [Arabidopsis thaliana]
Unigene27088_NAU-YH	1968	79.7872	38.6897	45.8956	-1.04421	-0.797801	0.246406	Down	Down	Up	C3H4 type zinc finger protein [Arabidopsis thaliana]
gi|166115873|gb|FD547383.1|FD547383	768	43.0643	6.83741	7.70049	-2.65497	-2.48347	0.171501	Down	Down	Up	C3H4 type zinc finger protein [Arabidopsis thaliana]
Unigene4050_NAU-YH	336	60.7155	1.73649	5.60036	-5.12782	-3.43847	1.68935	Down	Down	Up	C3H4 type zinc finger protein [Arabidopsis thaliana]
Unigene2017_NAU-YH	327	19.8503	0.01	10.6869	-10.9549	-0.893312	10.0616	Down	Down	Up	C3H4 type zinc finger protein [Arabidopsis thaliana]
Unigene36640_NAU-YH	461	26.1492	0.01	5.24806	-11.3526	-2.31691	9.03564	Down	Down	Up	C3H4 type zinc finger protein [Arabidopsis thaliana]
Unigene36404_NAU-YH	235	26.3061	0.01	3.43171	-11.3612	-2.9384	8.42278	Down	Down	Up	C3H4 type zinc finger protein [Arabidopsis thaliana]
CL8339.Contig3_NAU-YH	1355	41.289	5.16717	20.6325	-2.99831	-1.00084	1.99747	Down	Down	Up	C3H4 type zinc finger protein [Arabidopsis thaliana]
gi|332771969|gb|FY431391.1|FY431391	756	24.9404	2.31531	4.9781	-3.4292	-2.32482	1.10439	Down	Down	Up	C3H4 type zinc finger protein [Arabidopsis thaliana]
Unigene21250_NAU-YH	687	159.273	14.4379	77.0844	-3.46357	-1.04699	2.41658	Down	Down	Up	C3H4 type zinc finger protein [Arabidopsis thaliana]
Unigene21251_NAU-YH	416	167.18	14.0255	100.16	-3.57528	-0.739091	2.83619	Down	Down	Up	C3H4 type zinc finger protein [Arabidopsis thaliana]
10. CAMTA family
Unigene22158_NAU-YH	329	0.01	6.20701	11.439	9.27776	10.1597	0.881994	Up	Up	Up	calmodulin-binding transcription activator [Brassica napus]
CL9027.Contig2_NAU-YH	447	4.84045	7.17903	37.2856	0.568649	2.94541	2.37676	Up	Up	Up	calmodulin-binding transcription activator 4 [Arabidopsis thaliana]
Unigene29108_NAU-YH	490	4.41567	40.4849	68.5758	3.19668	3.957	0.760316	Up	Up	Up	calmodulin-binding transcription activator 5 [Arabidopsis lyrata subsp. lyrata]
Unigene29107_NAU-YH	884	16.4339	70.2923	107.344	2.09669	2.7075	0.610809	Up	Up	Up	calmodulin-binding transcription activator 5 [Arabidopsis thaliana]
CL6971.Contig1_NAU-YH	1846	12.2232	41.7208	46.8901	1.77114	1.93966	0.168517	Up	Up	Up	calmodulin-binding transcription activator 5 [Arabidopsis thaliana]
Unigene1675_NAU-YH	1243	6.71409	9.62262	25.303	0.519236	1.91404	1.39481	Up	Up	Up	calmodulin binding protein [Arabidopsis lyrata subsp. lyrata]
CL9027.Contig1_NAU-YH	2118	12.9885	14.6003	28.3032	0.168759	1.12373	0.954974	Up	Up	Up	calmodulin binding protein [Arabidopsis lyrata subsp. lyrata]
gi|156166130|gb|EW726276.1|EW726276	750	0.412129	1.16692	12.5448	1.50153	4.92785	3.42632	Up	Up	Up	calmodulin binding protein IQ [Brassica rapa]
gi|167478453|gb|FD963858.1|FD963858	523	2.95504	7.8092	102.798	1.402	5.12049	3.71849	Up	Up	Up	calmodulin-binding protein [Arabidopsis lyrata subsp. lyrata]
CL6971.Contig2_NAU-YH	3013	9.2329	19.1711	28.907	1.05408	1.64656	0.592488	Up	Up	Up	calmodulin-binding protein [Arabidopsis lyrata subsp. lyrata]
CL9927.Contig1_NAU-YH	759	5.29415	18.8337	7.43763	1.83084	0.490444	-1.3404	Up	Up	Down	calmodulin-binding protein [Arabidopsis lyrata subsp. lyrata]
CL1766.Contig2_NAU-YH	2105	7.04829	20.0954	17.4955	1.51152	1.31164	-0.199883	Up	Up	Down	calmodulin-binding protein [Arabidopsis lyrata subsp. lyrata]
CL3854.Contig2_NAU-YH	621	16.9232	45.5681	28.1371	1.42902	0.733471	-0.695551	Up	Up	Down	calmodulin-binding protein [Arabidopsis lyrata subsp. lyrata]
CL11902.Contig2_NAU-YH	1001	4.94061	20.9835	13.4274	2.0865	1.44242	-0.644075	Up	Up	Down	Calmodulin-binding protein [Arabidopsis thaliana]
gi|154258985|gb|EV570006.1|EV570006	652	11.8519	26.3988	7.83363	1.15536	-0.597363	-1.75272	Up	Down	Down	calmodulin-binding protein [Arabidopsis lyrata subsp. lyrata]
Unigene2062_NAU-YH	1172	39.2965	6.47182	39.6804	-2.60216	0.014026	2.61618	Down	Up	Up	calmodulin-binding protein [Arabidopsis lyrata subsp. lyrata]
Unigene19492_NAU-YH	934	75.1232	17.8036	38.5669	-2.07709	-0.961893	1.11519	Down	Down	Up	calmodulin binding protein 25 [Arabidopsis thaliana]
CL1766.Contig3_NAU-YH	274	77.8383	21.2941	21.5839	-1.87002	-1.85053	0.019498	Down	Down	Up	Calmodulin-binding protein [Arabidopsis thaliana]
Unigene3957_NAU-YH	507	15.2415	4.02782	1.06042	-1.91993	-3.84529	-1.92536	Down	Down	Down	calmodulin binding protein [Arabidopsis lyrata subsp. lyrata]
Unigene9581_NAU-YH	342	73.2072	37.5325	35.3707	-0.963847	-1.04943	-0.085584	Down	Down	Down	Calmodulin-binding protein [Arabidopsis thaliana]
12. ERF Family
gi|332773952|gb|FY430824.1|FY430824	910	1.35867	41.6757	44.3105	4.93894	5.02738	0.088445	Up	Up	Up	ethylene-responsive transcription factor RAP2-3 [Arabidopsis thaliana]
gi|167485922|gb|FD972542.1|FD972542	722	0.856224	19.7988	20.8501	4.53128	4.60592	0.074639	Up	Up	Up	ethylene-responsive transcription factor RAP2-3 [Arabidopsis thaliana]
CL1435.Contig2_NAU-YH	1113	16.6629	84.1376	91.2964	2.33611	2.45392	0.117807	Up	Up	Up	ethylene-responsive transcription factor RAP2-3 [Arabidopsis thaliana]
CL12742.Contig1_NAU-YH	796	0.01	9.52886	6.41649	9.89616	9.32564	-0.570518	Up	Up	Down	ethylene-responsive transcription factor ERF027 [Arabidopsis thaliana]
CL542.Contig1_NAU-YH	660	1.40499	49.5056	5.29489	5.13896	1.91404	-3.22492	Up	Up	Down	ethylene-responsive transcription factor ERF113 [Arabidopsis thaliana]
gi|332790590|gb|FY448078.1|FY448078	826	0.374209	20.1315	6.18345	5.74946	4.04649	-1.70297	Up	Up	Down	ethylene-responsive transcription factor ERF113 [Arabidopsis thaliana]
gi|156172429|gb|EW732575.1|EW732575	701	15.4328	48.2748	21.8582	1.64527	0.502173	-1.1431	Up	Up	Down	ethylene-responsive transcription factor ERF119 [Arabidopsis thaliana]
CL1503.Contig2_NAU-YH	1325	0.233281	7.26572	6.49219	4.96097	4.79857	-0.1624	Up	Up	Down	ethylene-responsive transcription factor RAP2-12 [Arabidopsis thaliana]
CL1503.Contig1_NAU-YH	1321	0.233987	6.18352	2.84893	4.72393	3.60592	-1.11801	Up	Up	Down	ethylene-responsive transcription factor RAP2-12 [Arabidopsis thaliana]
gi|167473974|gb|FD961971.1|FD961971	697	1.77387	17.1606	9.64194	3.27412	2.44242	-0.831702	Up	Up	Down	ethylene-responsive transcription factor RAP2-2 [Arabidopsis thaliana]
gi|154163755|gb|EV535029.1|EV535029	768	1.20741	19.3727	10.8507	4.00404	3.1678	-0.836235	Up	Up	Down	ethylene-responsive transcription factor RAP2-2 [Arabidopsis thaliana]
CL1503.Contig11_NAU-YH	853	126.103	308.146	243.921	1.28901	0.951812	-0.337199	Up	Up	Down	ethylene-responsive transcription factor RAP2-2 [Arabidopsis thaliana]
gi|158945268|gb|EX908978.1|EX908978	800	0.386371	12.3985	7.7285	5.00404	4.32213	-0.681907	Up	Up	Down	ethylene-responsive transcription factor RAP2-3 [Arabidopsis thaliana]
CL1435.Contig3_NAU-YH	933	3.64423	81.6092	74.0472	4.48505	4.34476	-0.140287	Up	Up	Down	ethylene-responsive transcription factor RAP2-3 [Arabidopsis thaliana]
Unigene8709_NAU-YH	818	15.8705	51.7125	3.6149	1.70416	-2.13432	-3.83848	Up	Down	Down	ethylene-responsive transcription factor CRF4 [Arabidopsis thaliana]
Unigene23421_NAU-YH	1259	15.9581	25.7204	8.11363	0.68862	-0.975874	-1.66449	Up	Down	Down	ethylene-responsive transcription factor ERF010 [Arabidopsis thaliana]
CL542.Contig4_NAU-YH	566	27.3054	63.3971	5.69931	1.21523	-2.26033	-3.47556	Up	Down	Down	ethylene-responsive transcription factor ERF113 [Arabidopsis thaliana]
CL4604.Contig1_NAU-YH	829	33.1841	10.5572	48.64	-1.65227	0.551651	2.20392	Down	Up	Up	ethylene-responsive transcription factor ERF039 [Arabidopsis thaliana]
Unigene34740_NAU-YH	274	43.9956	3.19412	4.90542	-3.78387	-3.16491	0.61896	Down	Down	Up	ethylene responsive element binding factor [Brassica oleracea]
gi|332772103|gb|FY431527.1|FY431527	830	208.547	6.67815	23.9668	-4.96478	-3.12126	1.84352	Down	Down	Up	ethylene responsive element binding factor 4-like protein [Eutrema halophilum]
CL3781.Contig1_NAU-YH	364	54.3467	2.40436	2.95404	-4.49847	-4.20143	0.297032	Down	Down	Up	ethylene responsive element binding factor 5 (ATERF5) [Arabidopsis thaliana]
gi|332786122|gb|FY445832.1|FY445832	780	61.8194	3.36611	6.54811	-4.1989	-3.23891	0.959997	Down	Down	Up	ethylene responsive element binding factor, putative [Brassica oleracea]
Unigene37072_NAU-YH	243	34.3441	0.01	2.21249	-11.7458	-3.95632	7.78953	Down	Down	Up	ethylene responsive element binding factor, putative [Brassica oleracea]
CL7842.Contig3_NAU-YH	1021	419.597	108.006	143.492	-1.9579	-1.54803	0.409864	Down	Down	Up	ethylene-responsive transcription factor 4 [Arabidopsis thaliana]
gi|158663718|gb|EX773609.1|EX773609	796	14.3676	0.01	0.33771	-10.4886	-5.41089	5.07771	Down	Down	Up	ethylene-responsive transcription factor ERF107 [Arabidopsis thaliana]
CL3444.Contig1_NAU-YH	583	174.961	0.500394	5.07202	-8.44975	-5.10832	3.34143	Down	Down	Up	ethylene-responsive transcription factor ERF109 [Arabidopsis thaliana]
CL3444.Contig2_NAU-YH	592	7.30973	0.01	2.7245	-9.51367	-1.42383	8.08985	Down	Down	Up	ethylene-responsive transcription factor ERF109 [Arabidopsis thaliana]
CL6588.Contig3_NAU-YH	909	154.719	34.6609	55.8927	-2.15826	-1.46891	0.689349	Down	Down	Up	ethylene-responsive transcription factor RAP2-4 [Arabidopsis thaliana]
CL6588.Contig4_NAU-YH	1679	64.2495	10.4251	18.0919	-2.62362	-1.82834	0.795283	Down	Down	Up	ethylene-responsive transcription factor RAP2-4 [Arabidopsis thaliana]
Unigene8264_NAU-YH	1203	58.8389	13.5801	52.0652	-2.11528	-0.176452	1.93883	Down	Down	Up	ethylene-responsive transcription factor TINY [Arabidopsis thaliana]
Unigene12724_NAU-YH	235	26.3061	0.01	0.01	-11.3612	-11.3612	0	Down	Down	unchanged	ethylene-responsive transcription factor ERF021 [Arabidopsis thaliana]
Unigene23841_NAU-YH	915	83.4393	11.7967	7.63852	-2.82234	-3.44936	-0.627019	Down	Down	Down	ERF2 transcription factor [Brassica carinata]
gi|332782366|gb|FY443385.1|FY443385	908	47.6581	0.963864	0.592109	-5.62775	-6.33072	-0.702968	Down	Down	Down	ethylene responsive element binding factor [Brassica oleracea]
CL3370.Contig1_NAU-YH	1000	196.895	29.173	20.4301	-2.75472	-3.26866	-0.513935	Down	Down	Down	ethylene responsive element binding factor 1 [Arabidopsis thaliana]
Unigene1446_NAU-YH	909	23.4628	13.4793	7.09749	-0.799635	-1.725	-0.925361	Down	Down	Down	ethylene responsive element binding factor, putative [Brassica oleracea]
CL10156.Contig1_NAU-YH	567	173.901	12.8629	7.11157	-3.75698	-4.61196	-0.854971	Down	Down	Down	ethylene responsive element binding factor, putative [Brassica oleracea]
gi|332784808|gb|FY450167.1|FY450167	842	183.916	12.8195	7.66225	-3.84264	-4.58514	-0.742497	Down	Down	Down	ethylene responsive element binding factor, putative [Brassica oleracea]
CL7842.Contig2_NAU-YH	1136	129.244	57.2673	12.305	-1.17431	-3.39278	-2.21847	Down	Down	Down	ethylene-responsive transcription factor 4 [Arabidopsis thaliana]
CL1750.Contig2_NAU-YH	1417	10.6886	5.14696	2.65592	-1.05428	-2.00879	-0.954507	Down	Down	Down	ethylene-responsive transcription factor ERF008 [Arabidopsis thaliana]
Unigene15423_NAU-YH	1009	83.9372	47.706	2.6642	-0.815138	-4.97754	-4.1624	Down	Down	Down	ethylene-responsive transcription factor ERF013 [Arabidopsis thaliana]
CL13606.Contig2_NAU-YH	441	28.7369	1.32304	1.21913	-4.44098	-4.55899	-0.118006	Down	Down	Down	ethylene-responsive transcription factor ERF034 [Arabidopsis thaliana]
gi|154092123|gb|EV525096.1|EV525096	831	34.2201	2.10635	0.970459	-4.02203	-5.14003	-1.11801	Down	Down	Down	ethylene-responsive transcription factor ERF035 [Arabidopsis thaliana]
gi|332793339|gb|FY448669.1|FY448669	700	7.94821	1.66703	0.768049	-2.25335	-3.37136	-1.11801	Down	Down	Down	ethylene-responsive transcription factor ERF061 [Arabidopsis thaliana]
CL6588.Contig1_NAU-YH	1737	233.825	194.99	101.987	-0.262025	-1.19705	-0.935023	Down	Down	Down	ethylene-responsive transcription factor RAP2-4 [Arabidopsis thaliana]
gi|332795137|gb|FY453201.1|FY453201	848	77.2743	50.571	32.6512	-0.611676	-1.24285	-0.631178	Down	Down	Down	ethylene-responsive transcription factor RAP2-ABC transporter of the mitochondrion 3 [Arabidopsis thaliana]
Unigene18775_NAU-YH	558	8.30906	6.79657	0.01	-0.289879	-9.69854	-9.40866	Down	Down	Down	Ethylene-responsive transcription factor-like protein [Arabidopsis thaliana]
Unigene18776_NAU-YH	529	16.3605	11.0295	4.06529	-0.568855	-2.00879	-1.43993	Down	Down	Down	Ethylene-responsive transcription factor-like protein [Arabidopsis thaliana]
13. GATA Family
Unigene20370_NAU-YH	1010	46.8236	22.2408	60.9497	-1.07403	0.380382	1.45441	Down	Up	Up	GATA transcription factor 12 [Arabidopsis thaliana]
Unigene21099_NAU-YH	656	78.6878	16.899	69.2532	-2.21921	-0.184259	2.03495	Down	Down	Up	GATA transcription factor 17 [Arabidopsis thaliana]
gi|166098055|gb|FD530898.1|FD530898	747	7.86191	0.390535	1.07959	-4.33136	-2.8644	1.46696	Down	Down	Up	GATA transcription factor 3 [Arabidopsis thaliana]
gi|332787129|gb|FY452853.1|FY452853	846	19.3642	2.41384	5.71952	-3.00399	-1.75943	1.24456	Down	Down	Up	GATA transcription factor 6 [Arabidopsis thaliana]
Unigene21097_NAU-YH	535	7.51077	2.72644	0.01	-1.46194	-9.55282	-8.09088	Down	Down	Down	GATA transcription factor 17 [Arabidopsis thaliana]
Unigene7464_NAU-YH	295	33.5292	7.91131	4.55623	-2.08343	-2.87951	-0.796078	Down	Down	Down	GATA transcription factor 4 [Arabidopsis thaliana]
Unigene7463_NAU-YH	702	25.5379	4.57126	2.68051	-2.48198	-3.25206	-0.770083	Down	Down	Down	GATA transcription factor 4 [Arabidopsis thaliana]
gi|167475534|gb|FD959406.1|FD959406	616	6.02137	0.473587	0.01	-3.66839	-9.23395	-5.56556	Down	Down	Down	GATA transcription factor 7 [Arabidopsis thaliana]
gi|332783163|gb|FY440471.1|FY440471	836	25.5116	8.37501	4.50172	-1.60699	-2.5026	-0.895613	Down	Down	Down	GATA transcription factor 8 [Arabidopsis thaliana]
14. GRAS Family
Unigene25597_NAU-YH	435	4.97398	12.0716	30.8985	1.27914	2.63507	1.35593	Up	Up	Up	GRAS family transcription factor [Arabidopsis thaliana]
Unigene28161_NAU-YH	663	9.7904	7.92026	45.0056	-0.305821	2.20066	2.50649	Down	Up	Up	GRAS family transcription factor SCL14 [Arabidopsis thaliana]
Unigene28166_NAU-YH	479	10.97	7.30847	39.2844	-0.585928	1.84039	2.42632	Down	Up	Up	GRAS family transcription factor SCL14 [Arabidopsis thaliana]
CL7574.Contig1_NAU-YH	1479	37.2003	15.5826	45.439	-1.25538	0.288617	1.544	Down	Up	Up	GRAS family transcription factor SCL14 [Arabidopsis thaliana]
CL689.Contig2_NAU-YH	2117	90.8164	25.907	49.2684	-1.80961	-0.882292	0.927318	Down	Down	Up	GRAS family transcription factor [Arabidopsis thaliana]
CL2758.Contig4_NAU-YH	2011	5.99442	0.01	4.5449	-9.22748	-0.399373	8.8281	Down	Down	Up	GRAS family transcription factor [Brassica oleracea]
gi|161574294|gb|EY946089.1|EY946089	486	14.628	0.01	0.01	-10.5145	-10.5145	0	Down	Down	unchanged	GRAS family transcription factor [Brassica oleracea]
gi|158915754|gb|EX888303.1|EX888303	744	10.8018	19.2134	32.8795	0.830842	1.60592	0.775079	Up	Up	Up	scarecrow-like protein 5 [Arabidopsis thaliana]
Unigene28167_NAU-YH	1410	5.26123	16.9658	11.2484	1.68916	1.09625	-0.592915	Up	Up	Down	scarecrow-like protein 9 [Arabidopsis thaliana]
Unigene31004_NAU-YH	761	2.43703	24.1511	12.7167	3.30889	2.38353	-0.925361	Up	Up	Down	scarecrow transcription factor family protein [Arabidopsis lyrata subsp. lyrata]
CL7517.Contig1_NAU-YH	2040	0.606073	2.00207	0.01	1.72393	-5.92142	-7.64535	Up	Down	Down	scarecrow-like protein 1 [Arabidopsis thaliana]
CL2155.Contig2_NAU-YH	439	6.33684	0.664532	11.6345	-3.25335	0.876569	4.12992	Down	Up	Up	scarecrow-like protein 1 [Arabidopsis thaliana]
CL689.Contig1_NAU-YH	1929	25.3174	12.4012	20.4853	-1.02966	-0.305542	0.724115	Down	Down	Up	scarecrow-like protein 7 [Arabidopsis thaliana]
Unigene24892_NAU-YH	1215	63.6002	19.9289	14.1599	-1.67417	-2.16722	-0.493045	Down	Down	Down	scarecrow-like 6 [Arabidopsis thaliana]
Unigene20424_NAU-YH	976	14.2514	4.18465	2.75428	-1.76793	-2.37136	-0.603433	Down	Down	Down	scarecrow transcription factor family protein [Arabidopsis lyrata subsp. lyrata]
Unigene28878_NAU-YH	1873	50.8286	34.2662	22.246	-0.568855	-1.1921	-0.623241	Down	Down	Down	scarecrow-like protein 11 [Arabidopsis thaliana]
Unigene20423_NAU-YH	619	29.4616	11.7823	6.94843	-1.32221	-2.08408	-0.761862	Down	Down	Down	scarecrow transcription factor family protein [Arabidopsis lyrata subsp. lyrata]
CL6751.Contig4_NAU-YH	1430	71.3301	41.0053	17.8585	-0.798699	-1.9979	-1.1992	Down	Down	Down	scarecrow-like protein 30 [Arabidopsis thaliana]
15. MADS Family
Unigene16007_NAU-YH	328	0.01	9.78361	11.4739	9.93422	10.1641	0.229917	Up	Up	Up	putative MADS-box transcription factor family protein [Zea mays]
CL4799.Contig2_NAU-YH	1293	0.478108	6.31742	4.98965	3.72393	3.38353	-0.340398	Up	Up	Down	MADS-box protein [Brassica rapa subsp. campestris]
Unigene5481_NAU-YH	892	8.31651	0.01	13.8628	-9.69984	0.737166	10.437	Down	Up	Up	MADS-box DNA-binding domain transcription factor [Brassica napus]
CL10845.Contig1_NAU-YH	1057	3.50914	2.75998	23.3975	-0.346463	2.73717	3.08363	Down	Up	Up	MADS-box protein AGL24 [Brassica napus]
CL9552.Contig3_NAU-YH	1084	14.2572	9.15019	20.5829	-0.639821	0.529749	1.16957	Down	Up	Up	MADS-box protein SVP [Brassica napus]
CL9552.Contig1_NAU-YH	1101	33.6891	10.0688	31.7405	-1.74239	-0.085957	1.65643	Down	Down	Up	MADS-box protein SVP [Brassica napus]
gi|166118618|gb|FD551088.1|FD551088	717	7.32866	0.01	2.24952	-9.51741	-1.70393	7.81347	Down	Down	Up	MADS-box protein SVP-a [Brassica oleracea var. botrytis]
16. MYB Family
CL8915.Contig3_NAU-YH	2367	1.43645	2.58822	5.90558	0.849458	2.03957	1.19012	Up	Up	Up	myb domain protein 3r-4 [Arabidopsis thaliana]
Unigene26378_NAU-YH	1243	9.94681	18.0717	20.9777	0.86143	1.07655	0.21512	Up	Up	Up	myb family transcription factor [Arabidopsis lyrata subsp. lyrata]
Unigene26375_NAU-YH	718	8.60995	11.7829	34.0702	0.452625	1.98443	1.53181	Up	Up	Up	myb family transcription factor [Arabidopsis lyrata subsp. lyrata]
gi|167477527|gb|FD962977.1|FD962977	700	0.441567	5.00108	12.2888	3.50153	4.79857	1.29703	Up	Up	Up	myb family transcription factor [Arabidopsis lyrata subsp. lyrata]
Unigene21872_NAU-YH	432	2.14651	11.4801	37.3357	2.41907	4.12049	1.70142	Up	Up	Up	myb family transcription factor [Arabidopsis lyrata subsp. lyrata]
Unigene26376_NAU-YH	620	2.99126	8.9401	17.7766	1.57954	2.57116	0.991619	Up	Up	Up	myb family transcription factor [Arabidopsis lyrata subsp. lyrata]
CL10825.Contig1_NAU-YH	506	9.77382	15.5666	31.8756	0.671459	1.70546	1.034	Up	Up	Up	myb family transcription factor [Brassica oleracea]
CL6324.Contig1_NAU-YH	1930	55.8937	109.134	166.026	0.965344	1.57065	0.605308	Up	Up	Up	myb transcription factor [Arabidopsis lyrata subsp. lyrata]
Unigene1690_NAU-YH	636	11.178	44.0347	28.3188	1.97797	1.34109	-0.636879	Up	Up	Down	myb domain protein 56 [Arabidopsis thaliana]
gi|158916037|gb|EX889045.1|EX889045	558	0.553937	15.1616	6.74452	4.77455	3.60592	-1.16863	Up	Up	Down	myb family transcription factor [Arabidopsis lyrata subsp. lyrata]
Unigene16867_NAU-YH	587	1.57971	14.9095	2.28976	3.2385	0.535532	-2.70297	Up	Up	Down	myb family transcription factor [Arabidopsis lyrata subsp. lyrata]
Unigene2585_NAU-YH	949	10.4227	46.4185	21.2448	2.15498	1.02738	-1.12759	Up	Up	Down	myb family transcription factor [Arabidopsis lyrata subsp. lyrata]
gi|332791068|gb|FY449501.1|FY449501	814	1.13918	39.4229	1.98145	5.11297	0.798566	-4.3144	Up	Up	Down	myb family transcription factor RVE1 [Arabidopsis thaliana]
gi|161535705|gb|EY908024.1|EY908024	680	1.36366	15.8735	0.790639	3.54106	-0.786396	-4.32746	Up	Down	Down	myb domain protein 14 [Arabidopsis thaliana]
CL10545.Contig2_NAU-YH	1103	1.96163	65.5929	0.731144	5.06341	-1.42383	-6.48724	Up	Down	Down	myb family transcription factor [Arabidopsis thaliana]
gi|156176329|gb|EW736475.1|EW736475	843	3.66663	5.53698	0.01	0.594644	-8.51831	-9.11295	Up	Down	Down	myb family transcription factor [Arabidopsis thaliana]
Unigene2893_NAU-YH	689	1.34585	9.73843	0.390156	2.85517	-1.7864	-4.64157	Up	Down	Down	myb107 [Arabidopsis lyrata subsp. lyrata]
CL6128.Contig2_NAU-YH	886	6.62849	6.91458	0.01	0.060962	-9.37254	-9.4335	Up	Down	Down	myb-like transcription factor-like protein [Arabidopsis thaliana]
gi|166131280|gb|FD562942.1|FD562942	690	7.16747	2.11398	14.8044	-1.7615	1.04649	2.80799	Down	Up	Up	myb family transcription factor [Arabidopsis lyrata subsp. lyrata]
gi|313133817|gb|HS106926.1|HS106926	810	17.9353	6.12272	19.2486	-1.55055	0.101958	1.65251	Down	Up	Up	myb family transcription factor [Arabidopsis thaliana]
CL6128.Contig1_NAU-YH	921	4.36293	0.01	21.015	-8.76915	2.26805	11.0372	Down	Up	Up	myb-like transcription factor-like protein [Arabidopsis thaliana]
gi|156160725|gb|EW720871.1|EW720871	657	7.99794	0.01	0.409159	-9.64349	-4.2889	5.35459	Down	Down	Up	myb domain protein 30 [Arabidopsis thaliana]
CL8934.Contig1_NAU-YH	756	14.31	1.92943	3.20021	-2.89078	-2.16079	0.729991	Down	Down	Up	myb domain protein 63 [Arabidopsis thaliana]
gi|332795309|gb|FY454170.1|FY454170	308	19.0677	1.89435	6.10948	-3.33136	-1.64201	1.68935	Down	Down	Up	myb family transcription factor [Arabidopsis lyrata subsp. lyrata]
CL3247.Contig1_NAU-YH	964	131.783	21.1837	43.7804	-2.63714	-1.58981	1.04733	Down	Down	Up	myb family transcription factor [Arabidopsis thaliana]
CL8627.Contig2_NAU-YH	1182	15.6902	2.96172	3.63881	-2.40536	-2.10832	0.297032	Down	Down	Up	myb family transcription factor [Arabidopsis thaliana]
Unigene16563_NAU-YH	287	17.2319	1.01648	4.68323	-4.08343	-1.87951	2.20392	Down	Down	Up	myb transcription factor Atmyb2 [Arabidopsis lyrata subsp. lyrata]
CL11038.Contig1_NAU-YH	617	41.5803	17.0215	33.5477	-1.28854	-0.309687	0.978856	Down	Down	Up	myb2 [Brassica oleracea var. botrytis]
gi|166099371|gb|FD530264.1|FD530264	722	6.8498	0.01	0.01	-9.41992	-9.41992	0	Down	Down	unchanged	myb domain protein 43 [Arabidopsis thaliana]
CL8433.Contig2_NAU-YH	325	30.4342	0.01	0.01	-11.5715	-11.5715	0	Down	Down	unchanged	myb family transcription factor [Arabidopsis lyrata subsp. lyrata]
gi|161572623|gb|EY944278.1|EY944278	812	10.6585	0.01	0.01	-10.0578	-10.0578	0	Down	Down	unchanged	myb transcription factor [Arabidopsis thaliana]
Unigene18447_NAU-YH	285	22.7756	0.01	0.01	-11.1533	-11.1533	0	Down	Down	unchanged	myb-like transcription factor family protein [Arabidopsis thaliana]
gi|161575397|gb|EY946515.1|EY946515	769	73.5563	2.65554	0.349567	-4.79177	-7.71713	-2.92536	Down	Down	Down	myb domain protein 28-2 [Brassica rapa subsp. pekinensis]
gi|167498120|gb|FD979935.1|FD979935	747	18.6203	0.390535	0.359862	-5.57528	-5.69329	-0.118006	Down	Down	Down	myb domain protein 30 [Arabidopsis thaliana]
gi|158929105|gb|EX901337.1|EX901337	810	76.7019	1.44064	0.01	-5.73448	-12.905	-7.17057	Down	Down	Down	myb domain protein 51-2 [Brassica rapa subsp. pekinensis]
CL1181.Contig1_NAU-YH	1276	174.412	92.5944	41.081	-0.913503	-2.08596	-1.17245	Down	Down	Down	myb domain protein 73 [Arabidopsis thaliana]
gi|158919463|gb|EX891646.1|EX891646	738	7.12012	1.58119	0.728502	-2.17089	-3.2889	-1.11801	Down	Down	Down	myb domain protein 88 [Arabidopsis thaliana]
gi|332782511|gb|FY443530.1|FY443530	828	15.6788	0.35233	0.01	-5.47575	-10.6146	-5.13886	Down	Down	Down	myb domain protein 92 [Arabidopsis thaliana]
CL3489.Contig1_NAU-YH	536	21.9136	15.7839	0.501525	-0.473375	-5.44936	-4.97599	Down	Down	Down	myb family transcription factor [Arabidopsis lyrata subsp. lyrata]
CL8433.Contig1_NAU-YH	1307	26.9603	0.223205	0.01	-6.91632	-11.3966	-4.4803	Down	Down	Down	myb family transcription factor [Arabidopsis lyrata subsp. lyrata]
CL11453.Contig2_NAU-YH	839	21.3679	7.99735	6.72844	-1.41785	-1.6671	-0.24925	Down	Down	Down	myb family transcription factor [Arabidopsis thaliana]
gi|161529384|gb|EY901394.1|EY901394	669	10.1646	0.872136	0.40182	-3.54286	-4.66087	-1.11801	Down	Down	Down	myb family transcription factor [Arabidopsis thaliana]
gi|166148152|gb|FD579566.1|FD579566	793	12.8628	5.51821	0.01	-1.22093	-10.329	-9.10806	Down	Down	Down	myb family transcription factor [Arabidopsis thaliana]
CL13768.Contig2_NAU-YH	1011	54.4206	45.5918	5.84963	-0.255381	-3.21774	-2.96236	Down	Down	Down	myb transcription factor [Arabidopsis thaliana]
gi|161539474|gb|EY911359.1|EY911359	565	15.8652	5.67969	0.951566	-1.48198	-4.05942	-2.57744	Down	Down	Down	myb-like protein [Brassica oleracea var. botrytis]
17. HSP Family
gi|166145196|gb|FD577894.1|FD577894	771	0.01	1.89189	15.3411	7.56369	10.5832	3.0195	Up	Up	Up	heat stress transcription factor A-8 [Arabidopsis thaliana]
Unigene6145_NAU-YH	228	0.01	28.1493	1.17902	11.4589	6.88145	-4.57744	Up	Up	Down	heat stress transcription factor B-4 [Arabidopsis thaliana]
CL3667.Contig2_NAU-YH	825	15.7358	48.4448	24.4379	1.62229	0.635067	-0.987219	Up	Up	Down	heat shock-related protein [Arabidopsis thaliana]
gi|158918757|gb|EX891278.1|EX891278	805	0.01	0.01	6.01082	0	9.23142	9.23142	unchanged	Up	Up	heat shock transcription factor A2 [Brassica napus]
gi|161558161|gb|EY930135.1|EY930135	633	0.01	0.01	6.79475	0	9.40828	9.40828	unchanged	Up	Up	heat shock transcription factor A2 [Brassica napus]
CL2971.Contig1_NAU-YH	1065	7.2558	1.36962	10.0964	-2.40536	0.476638	2.88199	Down	Up	Up	heat shock-related protein [Arabidopsis thaliana]
Unigene2376_NAU-YH	1056	42.735	13.2604	21.3832	-1.68829	-0.998941	0.689349	Down	Down	Up	heat stress transcription factor B-2b [Arabidopsis thaliana]
Unigene30721_NAU-YH	885	60.7716	0.329638	17.3137	-7.52637	-1.81149	5.71488	Down	Down	Up	heat stress transcription factor B-2a [Arabidopsis thaliana]
Unigene21266_NAU-YH	868	20.2978	1.68047	7.12304	-3.59439	-1.51076	2.08363	Down	Down	Up	heat stress transcription factor A-8 [Arabidopsis thaliana]
CL50.Contig4_NAU-YH	1319	8.20197	1.54822	1.63043	-2.40536	-2.33072	0.074639	Down	Down	Up	heat shock-related protein [Arabidopsis thaliana]
CL5170.Contig1_NAU-YH	1520	97.8129	3.45469	19.1002	-4.8234	-2.35644	2.46696	Down	Down	Up	heat shock transcription factor A4a [Brassica napus]
gi|156154588|gb|EW714734.1|EW714734	601	18.515	0.01	0.01	-10.8545	-10.8545	0	Down	Down	unchanged	heat stress transcription factor B-3 [Arabidopsis thaliana]
CL7729.Contig2_NAU-YH	270	20.6065	8.64384	0.99562	-1.25335	-4.37136	-3.11801	Down	Down	Down	heat stress transcription factor C-1 [Arabidopsis thaliana]
gi|332785159|gb|FY441691.1|FY441691	790	36.7786	2.21567	0.68055	-4.05305	-5.75602	-1.70297	Down	Down	Down	heat stress transcription factor B-2a [Arabidopsis thaliana]
gi|161548843|gb|EY920492.1|EY920492	628	7.38289	0.464538	0.428053	-3.99032	-4.10832	-0.118006	Down	Down	Down	heat stress transcription factor A-4a [Arabidopsis thaliana]
18. NAC Family
CL8699.Contig1_NAU-YH	994	2.17674	12.0331	13.522	2.46677	2.63507	0.168298	Up	Up	Up	NAC domain containing protein 17 [Arabidopsis thaliana]
CL275.Contig1_NAU-YH	335	0.01	2.6125	45.7391	8.02929	12.1592	4.12992	Up	Up	Up	NAC domain containing protein 74 [Arabidopsis thaliana]
Unigene17284_NAU-YH	256	1.20741	2.27914	48.3031	0.916572	5.32213	4.40556	Up	Up	Up	NAC domain containing protein 74 [Arabidopsis thaliana]
gi|156164069|gb|EW724215.1|EW724215	699	0.442199	7.51235	8.46063	4.0865	4.258	0.171501	Up	Up	Up	NAC domain containing protein 87 [Arabidopsis thaliana]
CL2678.Contig3_NAU-YH	1203	10.5345	31.7677	58.0985	1.59244	2.46338	0.870939	Up	Up	Up	NAC domain-containing protein 69 [Arabidopsis thaliana]
CL2678.Contig2_NAU-YH	1217	12.1912	22.2932	30.9239	0.870768	1.34289	0.472118	Up	Up	Up	NAC domain-containing protein 69 [Arabidopsis thaliana]
gi|158640188|gb|EX750079.1|EX750079	627	0.985955	4.65278	9.00345	2.2385	3.19088	0.952383	Up	Up	Up	NAC family transcriptional activator [Arabidopsis thaliana]
CL7939.Contig1_NAU-YH	831	8.92699	29.1379	19.4092	1.70665	1.12049	-0.586155	Up	Up	Down	NAC domain containing protein 87 [Arabidopsis thaliana]
gi|166098708|gb|FD532271.1|FD532271	734	2.10557	15.8981	2.92989	2.91657	0.476638	-2.43993	Up	Up	Down	NAC5 [Brassica napus]
Unigene10202_NAU-YH	472	2.61947	13.5976	1.13906	2.376	-1.20143	-3.57744	Up	Down	Down	NAC domain containing protein 35 [Arabidopsis thaliana]
CL2001.Contig1_NAU-YH	761	3.24938	14.5673	3.17918	2.1645	-0.031509	-2.19601	Up	Down	Down	NAC domain containing protein 58 [Arabidopsis thaliana]
Unigene17245_NAU-YH	809	1.91036	9.01513	0.01	2.2385	-7.5777	-9.8162	Up	Down	Down	NAC domain-containing protein 1 [Arabidopsis thaliana]
CL8478.Contig4_NAU-YH	396	3.12219	18.4173	1.35766	2.56043	-1.20143	-3.76186	Up	Down	Down	NAC5 [Brassica napus]
gi|156177083|gb|EW737229.1|EW737229	903	9.9267	27.7838	9.2285	1.48486	-0.105219	-1.59007	Up	Down	Down	NAC5 [Brassica napus]
gi|156162605|gb|EW722751.1|EW722751	871	23.0669	31.1491	11.4193	0.433363	-1.01435	-1.44771	Up	Down	Down	NAC5 [Brassica napus]
Unigene18231_NAU-YH	1015	17.3582	17.5325	5.56174	0.014419	-1.64201	-1.65643	Up	Down	Down	NAC-domain protein 14 [Brassica napus]
gi|166139117|gb|FD570538.1|FD570538	756	13.0835	2.7012	8.1783	-2.27607	-0.677872	1.5982	Down	Down	Up	NAC domain containing protein 17 [Arabidopsis thaliana]
gi|332785469|gb|FY444001.1|FY444001	907	21.8106	0.964927	8.89142	-4.49847	-1.29454	3.20392	Down	Down	Up	NAC domain containing protein 2 [Arabidopsis thaliana]
Unigene32456_NAU-YH	584	12.7026	0.499537	3.22212	-4.66839	-1.97904	2.68935	Down	Down	Up	NAC domain containing protein 20 [Arabidopsis thaliana]
CL859.Contig1_NAU-YH	947	24.8061	0.92417	10.5029	-4.74639	-1.23991	3.50649	Down	Down	Up	NAC domain containing protein 41 [Arabidopsis thaliana]
CL4419.Contig2_NAU-YH	1218	10.9123	3.1137	3.53126	-1.80925	-1.6277	0.181554	Down	Down	Up	NAC domain containing protein 73 [Arabidopsis thaliana]
gi|332775523|gb|FY436025.1|FY436025	880	20.7236	3.97813	15.2737	-2.38111	-0.440221	1.94089	Down	Down	Up	NAC transcription factor family protein NAC036 [Arabidopsis thaliana]
gi|166112562|gb|FD544793.1|FD544793	592	6.7876	0.01	0.908166	-9.40676	-2.90187	6.50488	Down	Down	Up	NAC042 [Arabidopsis lyrata subsp. lyrata]
Unigene6792_NAU-YH	825	7.1186	0.707223	0.977517	-3.33136	-2.8644	0.466957	Down	Down	Up	NAC105 [Eutrema parvulum]
gi|166122143|gb|FD555684.1|FD555684	859	26.6277	0.339615	1.25177	-6.29288	-4.41089	1.88199	Down	Down	Up	NAC-domain protein 1-1 [Brassica napus]
gi|332787099|gb|FY452823.1|FY452823	832	8.17324	0.01	0.01	-9.67476	-9.67476	0	Down	Down	unchanged	NAC domain containing protein 2 [Arabidopsis thaliana]
gi|156154887|gb|EW715033.1|EW715033	751	8.64319	0.01	0.01	-9.75542	-9.75542	0	Down	Down	unchanged	NAC domain containing protein 35 [Arabidopsis thaliana]
gi|158917716|gb|EX891395.1|EX891395	886	6.62849	0.01	0.01	-9.37254	-9.37254	0	Down	Down	unchanged	NAC domain-containing protein 72 [Arabidopsis thaliana]
Unigene16152_NAU-YH	1152	48.2964	20.0058	8.16719	-1.2715	-2.564	-1.2925	Down	Down	Down	NAC domain containing protein 10 [Arabidopsis thaliana]
Unigene16025_NAU-YH	424	24.0571	10.3206	5.70603	-1.22093	-2.0759	-0.854971	Down	Down	Down	NAC domain containing protein 57 [Arabidopsis thaliana]
CL4419.Contig1_NAU-YH	1329	35.1194	3.73168	2.62951	-3.23437	-3.7394	-0.505029	Down	Down	Down	NAC domain containing protein 73 [Arabidopsis thaliana]
CL8478.Contig1_NAU-YH	403	82.8349	22.4407	18.0101	-1.88412	-2.20143	-0.317315	Down	Down	Down	NAC5 [Brassica napus]
gi|166124955|gb|FD560066.1|FD560066	764	5.2595	0.381845	0.01	-3.78387	-9.03878	-5.25491	Down	Down	Down	NAC-domain protein 1-1 [Brassica napus]
Unigene20912_NAU-YH	1275	63.0316	50.5665	10.331	-0.317893	-2.60909	-2.2912	Down	Down	Down	NAC-domain protein 18 [Brassica napus]
gi|154172112|gb|EV543385.1|EV543385	827	41.1133	11.2882	1.3002	-1.86479	-4.98279	-3.11801	Down	Down	Down	NAC-domain protein 5-1 [Brassica napus]
gi|167445230|gb|FD951918.1|FD951918	742	6.66517	5.11117	0.01	-0.382988	-9.3805	-8.99751	Down	Down	Down	NAC-domain protein 5-7 [Brassica napus]
gi|156172309|gb|EW732455.1|EW732455	846	39.8246	8.96568	3.81301	-2.15117	-3.38466	-1.23348	Down	Down	Down	NAC-domain protein 5-8 [Brassica napus]
19. NF-YA Family
Unigene30281_NAU-YH	944	21.2832	37.7023	100.522	0.824941	2.23972	1.41478	Up	Up	Up	nuclear transcription factor Y subunit A-3 [Arabidopsis thaliana]
CL8023.Contig1_NAU-YH	775	6.78019	30.114	25.6677	2.15104	1.92056	-0.230481	Up	Up	Down	nuclear transcription factor Y subunit A-3 [Arabidopsis thaliana]
gi|156176146|gb|EW736292.1|EW736292	892	4.50478	16.3526	15.3696	1.85999	1.77055	-0.089437	Up	Up	Down	nuclear transcription factor Y subunit A-4 [Arabidopsis thaliana]
gi|154096026|gb|EV528999.1|EV528999	866	7.49542	1.01061	9.31238	-2.89078	0.313139	3.20392	Down	Up	Up	nuclear transcription factor Y subunit A-2 [Arabidopsis thaliana]
20. NF-YB Family
gi|332774636|gb|FY432169.1|FY432169	829	15.6599	7.39001	31.1296	-1.08343	0.991211	2.07464	Down	Up	Up	nuclear transcription factor Y subunit B-10 [Arabidopsis thaliana]
Unigene16060_NAU-YH	767	67.3001	27.005	62.3852	-1.31739	-0.109405	1.20798	Down	Down	Up	nuclear transcription factor Y subunit B-3 [Arabidopsis thaliana]
gi|166147708|gb|FD578552.1|FD578552	569	15.2104	3.07623	14.1731	-2.30582	-0.101898	2.20392	Down	Down	Up	nuclear transcription factor Y subunit B-3 [Arabidopsis thaliana]
Unigene16061_NAU-YH	586	12.6593	1.4935	8.71592	-3.08343	-0.538469	2.54496	Down	Down	Up	nuclear transcription factor Y subunit B-3 [Arabidopsis thaliana]
21. R2R3-MYB
gi|167439095|gb|FD947809.1|FD947809	685	38.8063	1.27765	1.56974	-4.92473	-4.6277	0.297032	Down	Down	Up	R2R3 DNA binding transcription factor MYB28-2 [Brassica juncea]
Unigene968_NAU-YH	1656	231.076	23.9585	31.4919	-3.26976	-2.87532	0.394444	Down	Down	Up	R2R3 DNA binding transcription factor MYB28-3 [Brassica juncea]
gi|332780513|gb|FY443096.1|FY443096	735	19.3448	0.396911	2.9259	-5.60699	-2.725	2.88199	Down	Down	Up	R2R3-MYB transcription factor [Arabidopsis thaliana]
CL8256.Contig2_NAU-YH	945	96.1635	9.87867	13.6542	-3.2831	-2.81614	0.466957	Down	Down	Up	R2R3-MYB transcription factor [Brassica rapa]
gi|154263723|gb|EV574694.1|EV574694	805	46.4605	4.34876	5.67689	-3.41733	-3.03283	0.384495	Down	Down	Up	R2R3-MYB transcription factor [Brassica rapa]
gi|161571878|gb|EY942590.1|EY942590	781	95.7765	2.2412	2.06518	-5.41733	-5.53533	-0.118006	Down	Down	Down	R2R3 DNA binding transcription factor MYB28-2 [Brassica juncea]
CL8256.Contig1_NAU-YH	965	191.864	61.0667	20.8925	-1.65163	-3.19903	-1.5474	Down	Down	Down	R2R3-MYB transcription factor [Brassica rapa]
gi|158924613|gb|EX897609.1|EX897609	684	44.7377	1.27952	0.393008	-5.12782	-6.83079	-1.70297	Down	Down	Down	R2R3-MYB transcription family protein [Brassica oleracea]
22. SPL family
Unigene24876_NAU-YH	529	11.1018	21.5075	30.9978	0.954047	1.48138	0.527329	Up	Up	Up	squamosa promoter binding-like protein 14 [Arabidopsis thaliana]
Unigene15981_NAU-YH	680	7.72743	18.4476	35.1834	1.25537	2.18684	0.931463	Up	Up	Up	squamosa promoter-binding-like protein 11 [Arabidopsis thaliana]
CL13547.Contig2_NAU-YH	982	9.12812	23.4691	22.4471	1.36237	1.29814	-0.064235	Up	Up	Down	squamosa promoter binding-like protein 14 [Arabidopsis thaliana]
Unigene6227_NAU-YH	451	1.37072	13.5839	9.53675	3.30889	2.79857	-0.510323	Up	Up	Down	squamosa promoter-binding-like protein 2 [Arabidopsis thaliana]
CL9530.Contig1_NAU-YH	683	39.8251	37.5874	17.7112	-0.083428	-1.16901	-1.08558	Down	Down	Down	squamosa promoter-binding-like protein 7 [Arabidopsis thaliana]
23. TCP Family
Unigene5781_NAU-YH	1030	11.1035	39.6526	12.0054	1.8364	0.112675	-1.72373	Up	Up	Down	transcription factor TCP9 [Arabidopsis thaliana]
gi|332769199|gb|FY432435.1|FY432435	827	6.72763	15.5213	1.3002	1.20608	-2.37136	-3.57744	Up	Down	Down	transcription factor TCP15 [Arabidopsis thaliana]
CL6646.Contig5_NAU-YH	882	4.9063	7.93822	0.304781	0.694179	-4.00879	-4.70297	Up	Down	Down	transcription factor TCP7 [Arabidopsis thaliana]
Unigene5782_NAU-YH	577	20.3565	47.5261	11.1813	1.22323	-0.864399	-2.08763	Up	Down	Down	transcription factor TCP9 [Arabidopsis thaliana]
gi|158944155|gb|EX907161.1|EX907161	776	5.57649	0.01	1.38566	-9.12321	-2.00879	7.11442	Down	Down	Up	transcription factor TCP7 [Arabidopsis thaliana]
CL5855.Contig1_NAU-YH	334	36.0922	35.8111	7.24358	-0.011278	-2.31691	-2.30563	Down	Down	Down	transcription factor TCP15 [Arabidopsis thaliana]
gi|167484774|gb|FD967236.1|FD967236	534	16.2073	5.4631	2.01361	-1.56886	-3.00879	-1.43993	Down	Down	Down	transcription factor TCP15 [Arabidopsis thaliana]
gi|167452398|gb|FD953523.1|FD953523	697	21.7299	7.11536	5.01381	-1.61068	-2.1157	-0.505029	Down	Down	Down	transcription factor TCP15 [Arabidopsis thaliana]
gi|166097736|gb|FD533189.1|FD533189	581	12.7682	1.50635	1.38804	-3.08343	-3.20143	-0.118006	Down	Down	Down	transcription factor TCP15 [Arabidopsis thaliana]
gi|158924451|gb|EX895992.1|EX895992	741	6.67416	0.787394	0.01	-3.08343	-9.38244	-6.29901	Down	Down	Down	transcription factor TCP15 [Arabidopsis thaliana]
gi|166133042|gb|FD565514.1|FD565514	581	26.0684	1.00423	0.46268	-4.69814	-5.81614	-1.11801	Down	Down	Down	transcription factor TCP15 [Arabidopsis thaliana]
CL6646.Contig3_NAU-YH	964	14.4288	9.07872	3.06742	-0.668391	-2.23386	-1.56547	Down	Down	Down	transcription factor TCP21 [Arabidopsis thaliana]
gi|166112198|gb|FD544202.1|FD544202	652	22.2815	18.7924	2.88608	-0.2457	-2.94867	-2.70297	Down	Down	Down	transcription factor TCP7 [Arabidopsis thaliana]
CL6646.Contig6_NAU-YH	829	19.3885	14.4281	0.972801	-0.426316	-4.31691	-3.89059	Down	Down	Down	transcription factor TCP7 [Arabidopsis thaliana]
24. TGA Family
gi|166107168|gb|FD540884.1|FD540884	787	0.785507	4.81891	9.22245	2.61701	3.55345	0.936442	Up	Up	Up	transcription factor TGA7 [Arabidopsis thaliana]
CL2202.Contig3_NAU-YH	905	46.7915	7.09177	43.0702	-2.72203	-0.119557	2.60247	Down	Down	Up	transcription factor TGA7 [Arabidopsis thaliana]
CL13641.Contig1_NAU-YH	849	16.3832	2.74892	3.79954	-2.57528	-2.10832	0.466957	Down	Down	Up	TGA2 protein [Brassica rapa subsp. pekinensis]
gi|166100584|gb|FD530010.1|FD530010	762	13.7917	3.44562	0.705557	-2.00097	-4.2889	-2.28793	Down	Down	Down	TGA2 protein [Brassica rapa subsp. pekinensis]
25. WRKY Family
CL2920.Contig1_NAU-YH	703	0.01	5.39471	6.50056	9.0754	9.34442	0.269017	Up	Up	Up	WRKY DNA-binding protein 14 [Arabidopsis lyrata subsp. lyrata]
gi|332787204|gb|FY452928.1|FY452928	842	6.24068	16.2842	19.7941	1.3837	1.6653	0.281602	Up	Up	Up	WRKY DNA-binding protein 21 [Arabidopsis thaliana]
CL2933.Contig2_NAU-YH	981	3.15084	9.21877	13.4272	1.54884	2.09135	0.542508	Up	Up	Up	WRKY transcription factor 2 [Brassica napus]
Unigene28591_NAU-YH	550	5.61995	22.2775	26.8817	1.98696	2.258	0.271036	Up	Up	Up	WRKY2 transcription factor [Brassica napus]
gi|158648156|gb|EX758047.1|EX758047	679	0.455224	5.15575	7.12623	3.50153	3.96849	0.466957	Up	Up	Up	WRKY21-1 transcription factor [Brassica napus]
Unigene13326_NAU-YH	726	1.27726	2.81282	9.62707	1.13896	2.91404	1.77508	Up	Up	Up	WRKY50 transcription factor [Brassica napus]
gi|332780584|gb|FY443167.1|FY443167	801	10.419	24.7661	15.7733	1.24915	0.598267	-0.65088	Up	Up	Down	WRKY DNA-binding protein 23 [Arabidopsis thaliana]
gi|167435503|gb|FD941125.1|FD941125	778	7.54864	16.8738	3.80076	1.1605	-0.98993	-2.15043	Up	Down	Down	WRKY6-1 transcription factor [Brassica napus]
Unigene12523_NAU-YH	845	35.1163	11.7382	70.6242	-1.58093	1.00802	2.58895	Down	Up	Up	WRKY46 [Brassica rapa subsp. chinensis]
Unigene12522_NAU-YH	320	33.8075	8.20489	75.6049	-2.04279	1.16114	3.20392	Down	Up	Up	WRKY46 [Brassica rapa subsp. chinensis]
gi|158659135|gb|EX769026.1|EX769026	786	10.6178	0.01	0.342007	-10.0523	-4.95632	5.09595	Down	Down	Up	WRKY DNA-binding protein 40 [Arabidopsis lyrata subsp. lyrata]
CL1285.Contig3_NAU-YH	1356	11.1694	1.29084	1.3877	-3.11318	-3.00879	0.104387	Down	Down	Up	WRKY transcription factor 11 [Brassica napus]
gi|166131535|gb|FD565327.1|FD565327	770	131.667	27.6575	33.5149	-2.25116	-1.97402	0.277132	Down	Down	Up	WRKY transcription factor 18 [Arabidopsis thaliana]
gi|332786442|gb|FY444966.1|FY444966	643	9.61422	0.453701	1.2542	-4.40536	-2.9384	1.46696	Down	Down	Up	WRKY transcription factor 40 [Brassica napus]
gi|332787000|gb|FY452724.1|FY452724	857	5.4101	0.01	2.82305	-9.07951	-0.9384	8.14111	Down	Down	Up	WRKY transcription factor 40 [Brassica napus]
gi|158660464|gb|EX770355.1|EX770355	614	8.05465	0.01	0.875626	-9.65368	-3.20143	6.45224	Down	Down	Up	WRKY transcription factor 40 [Brassica napus]
gi|158926994|gb|EX899026.1|EX899026	794	29.9754	2.93934	7.10978	-3.35021	-2.0759	1.27431	Down	Down	Up	WRKY transcription factor 70 [Brassica napus]
gi|332793043|gb|FY447976.1|FY447976	823	34.5528	0.708942	1.63315	-5.60699	-4.40307	1.20392	Down	Down	Up	WRKY40-1 transcription factor [Brassica napus]
gi|158656235|gb|EX766126.1|EX766126	730	5.92789	0.01	0.01	-9.21137	-9.21137	0	Down	Down	unchanged	WRKY15-1 transcription factor [Brassica napus]
gi|158929302|gb|EX901894.1|EX901894	804	68.4319	5.07987	0.6687	-3.75181	-6.67717	-2.92536	Down	Down	Down	WRKY transcription factor [Brassica napus]
Unigene24246_NAU-YH	1152	38.6371	25.3237	13.3009	-0.609497	-1.53847	-0.928972	Down	Down	Down	WRKY DNA-binding protein 15 [Arabidopsis thaliana]
CL13518.Contig1_NAU-YH	1214	9.16597	1.92244	1.55002	-2.25335	-2.564	-0.310651	Down	Down	Down	WRKY transcription factor 22 [Arabidopsis lyrata subsp. lyrata]
CL1206.Contig2_NAU-YH	1395	15.5102	9.82888	7.12992	-0.658122	-1.12126	-0.463141	Down	Down	Down	WRKY transcription factor 24 [Brassica napus]
gi|158924830|gb|EX897826.1|EX897826	704	74.6399	2.48633	1.52737	-4.90786	-5.61083	-0.702968	Down	Down	Down	WRKY transcription factor 33 [Arabidopsis lyrata subsp. lyrata]
CL7855.Contig1_NAU-YH	239	31.039	1.22063	1.12476	-4.66839	-4.7864	-0.118006	Down	Down	Down	WRKY transcription factor 36 [Brassica napus]
gi|167483074|gb|FD966424.1|FD966424	769	8.03893	0.379362	0.01	-4.40536	-9.65086	-5.2455	Down	Down	Down	WRKY transcription factor 40 [Brassica napus]
CL443.Contig1_NAU-YH	881	11.9288	1.32454	0.305127	-3.17089	-5.2889	-2.11801	Down	Down	Down	WRKY transcription factor 42 [Brassica napus]
CL1118.Contig3_NAU-YH	1414	18.7994	8.2526	3.61211	-1.18776	-2.37977	-1.19201	Down	Down	Down	WRKY transcription factor 7 [Brassica napus]
Unigene30978_NAU-YH	329	35.7012	23.0546	2.45122	-0.630916	-3.8644	-3.23348	Down	Down	Down	WRKY1 [Brassica rapa subsp. chinensis]
gi|332785188|gb|FY442129.1|FY442129	884	24.8257	12.5404	6.69002	-0.985248	-1.89175	-0.906502	Down	Down	Down	WRKY11-1 transcription factor [Brassica napus]
Unigene12058_NAU-YH	387	53.5129	19.5994	11.1139	-1.44908	-2.26752	-0.818446	Down	Down	Down	WRKY44 transcription factor [Brassica napus]
Unigene15176_NAU-YH	1209	39.1165	26.3015	3.55755	-0.572632	-3.45882	-2.88619	Down	Down	Down	WRKY6-1 transcription factor [Brassica napus]
gi|161572208|gb|EY943760.1|EY943760	833	5.56597	1.75108	0.01	-1.66839	-9.12049	-7.4521	Down	Down	Down	WRKY65-1 transcription factor [Brassica napus]
gi|167450474|gb|FD956429.1|FD956429	730	7.62157	0.799259	0.736486	-3.25335	-3.37136	-0.118006	Down	Down	Down	WRKY65-1 transcription factor [Brassica napus]
Unigene20816_NAU-YH	250	68.0013	9.33535	4.30108	-2.86479	-3.98279	-1.11801	Down	Down	Down	WRKY7 [Brassica rapa subsp. pekinensis]
CL1118.Contig1_NAU-YH	1430	16.2114	9.79232	2.81976	-0.727284	-2.52336	-1.79608	Down	Down	Down	WRKY7 [Brassica rapa subsp. pekinensis]
